# Supplementary material for: LEO1 Is Required for Efficient Entry into Quiescence, Control of H3K9 Methylation and Gene Expression in Human Fibroblasts
Source: MDPI journal article supplement (doi:10.3390/biom13111662), 2023-11-17

## A) MTT assay with four replicates

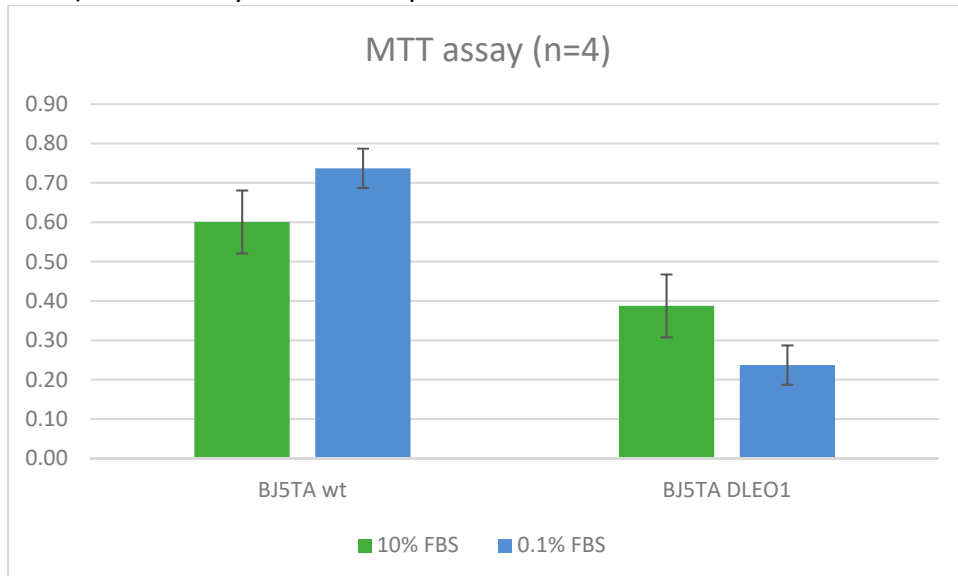

## B) FACS analysis in triplicates

T-0

WT

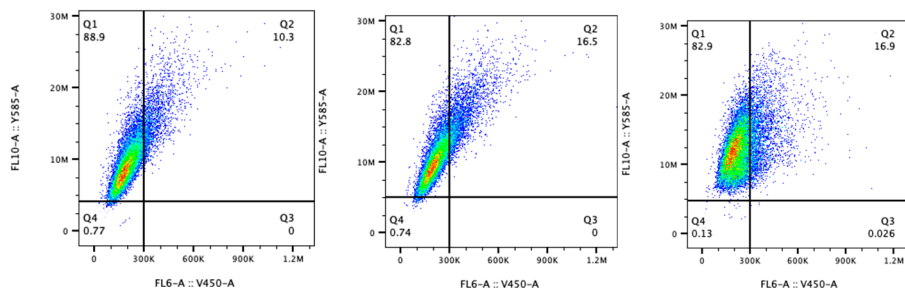

T-0

Leo1

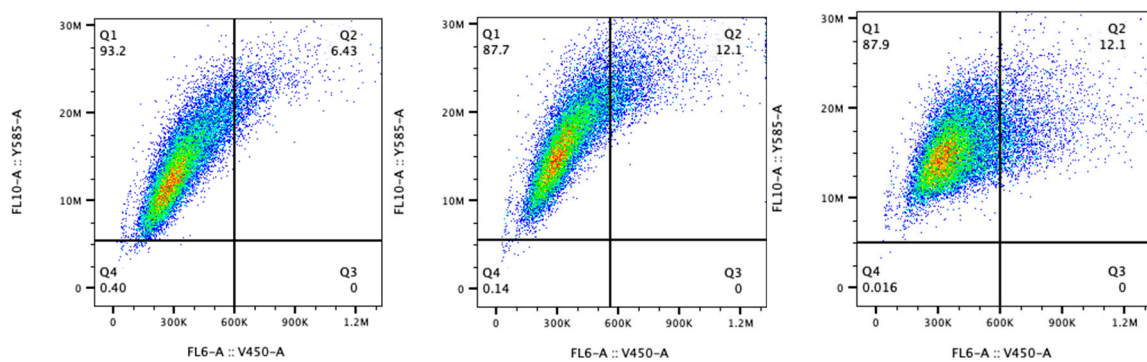

T-1D  
WT

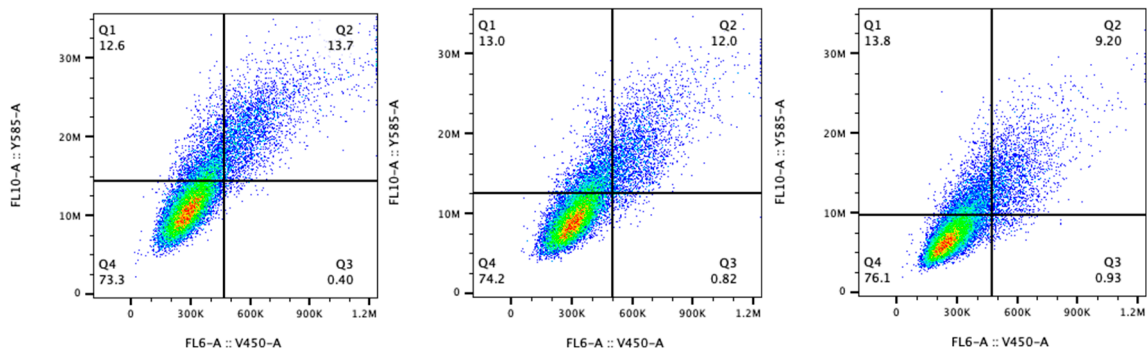

T1-D  
Leo1

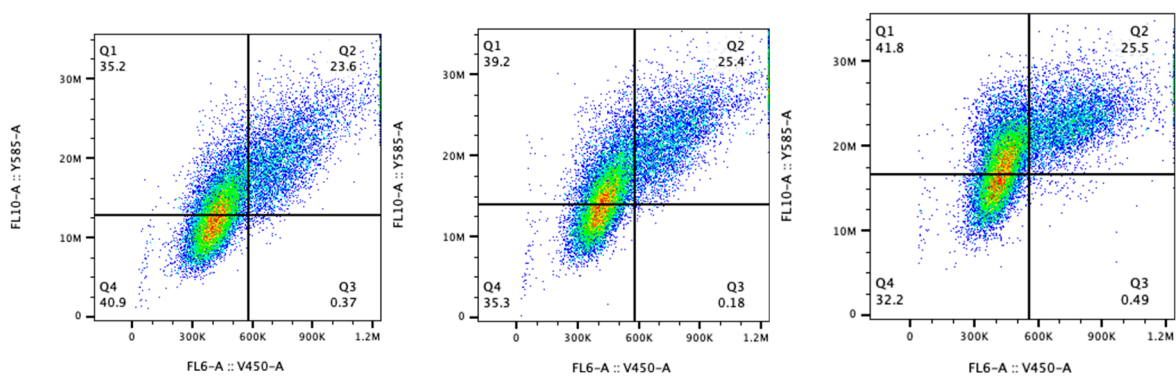

T-3D  
WT

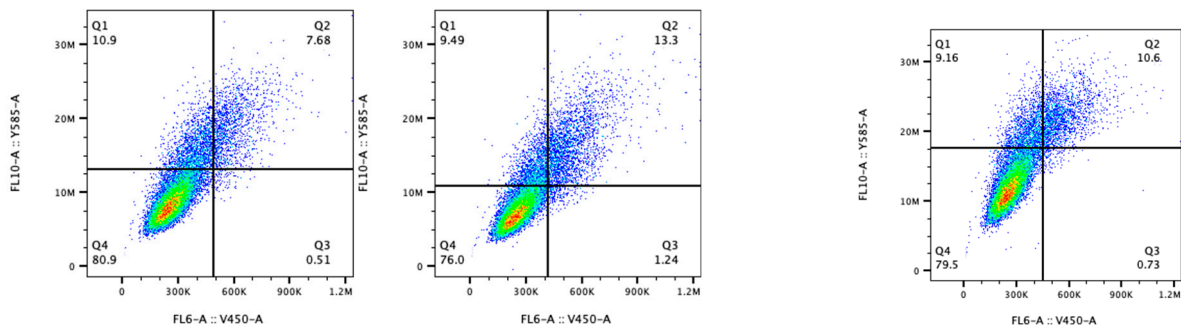

T3-D  
Leo1

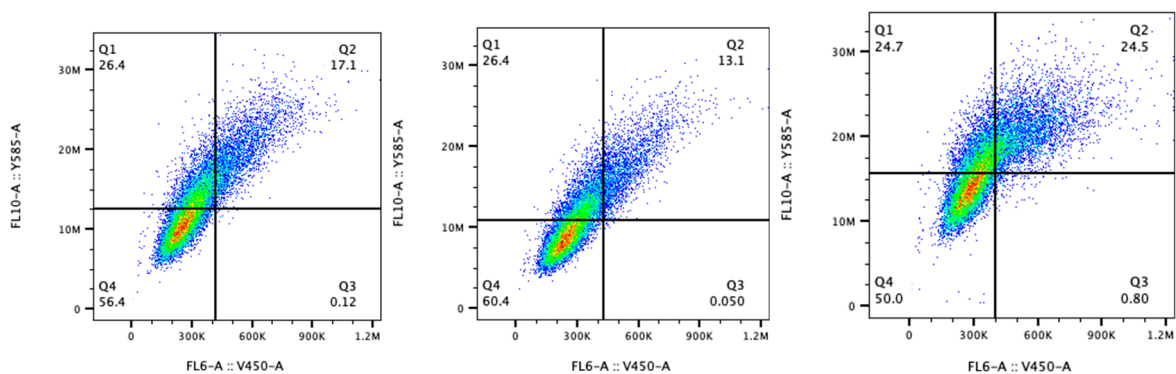

T-6D

WT

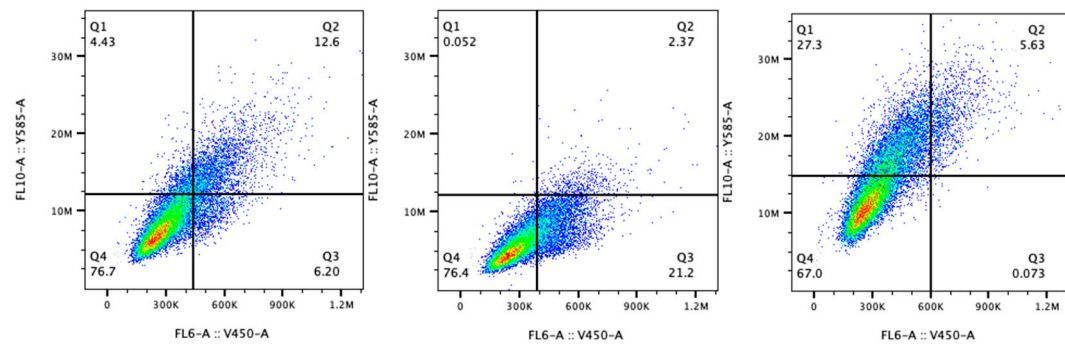

T6-D Leo1

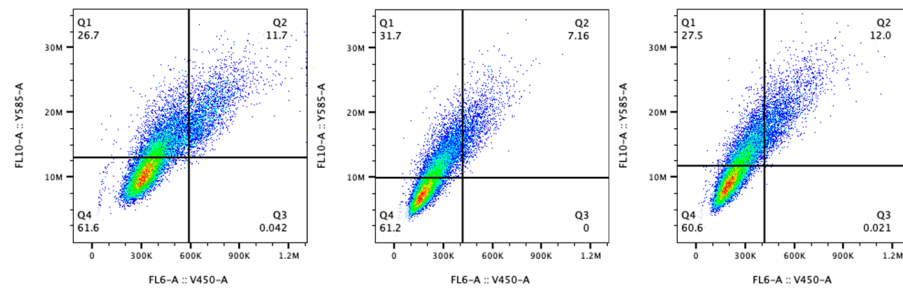

T-9D

WT

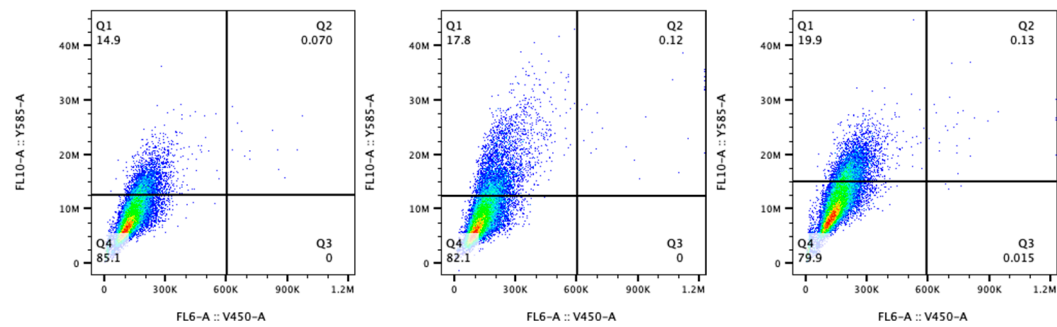

T9-D Leo1

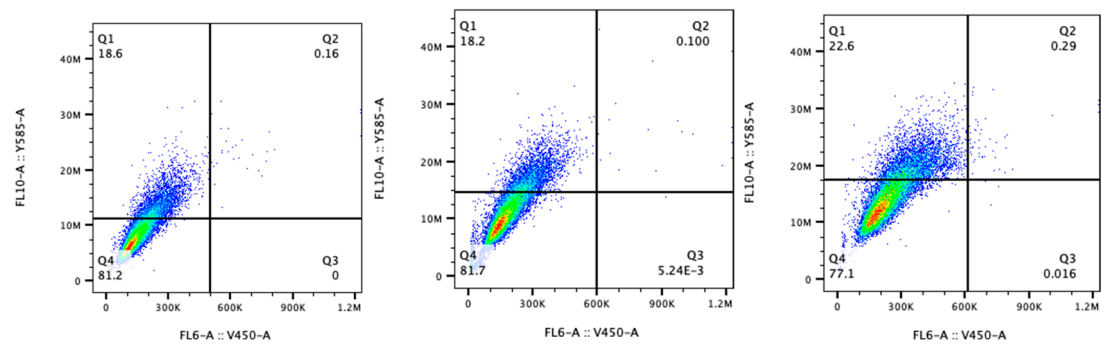

### C) Cell morphology change statistics

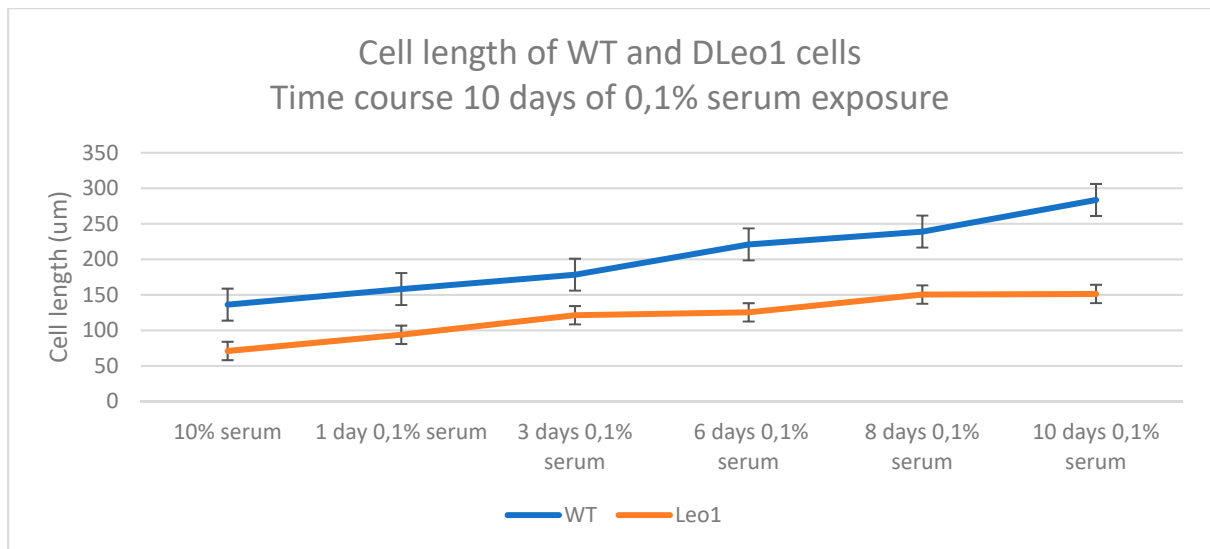

Supplement: s1 [file s1]
