# Supplementary material for: LEO1 Is Required for Efficient Entry into Quiescence, Control of H3K9 Methylation and Gene Expression in Human Fibroblasts
Source: MDPI journal article supplement (doi:10.3390/biom13111662), 2023-11-17
Supplement: s1 [file s1]

**Filename: BEA20P105\_LC library QC 2020-08-17-01.HSD1000**
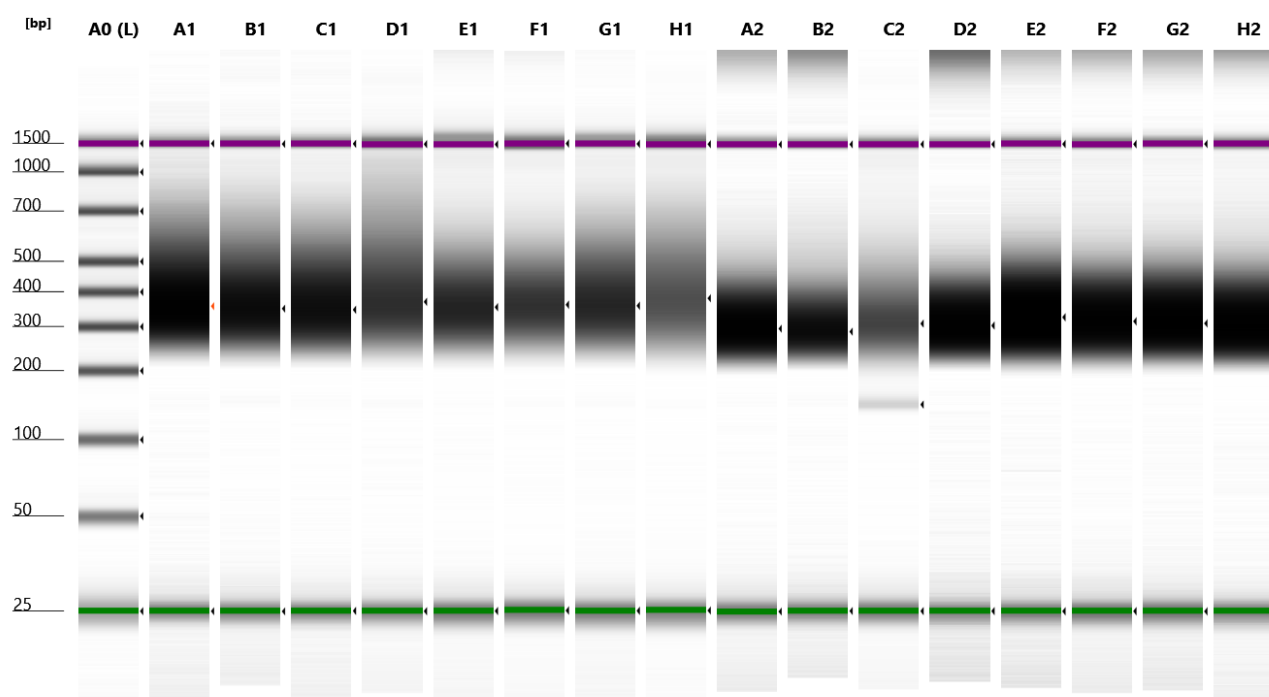

Default image (Contrast 100%)

**Sample Info**

| Well | Conc. [pg/ul] | Sample Description                  | Alert | Observations |
|------|---------------|-------------------------------------|-------|--------------|
| A0   | 2350          | Electronic Ladder                   |       | Ladder       |
| A1   | 5120          | BEA20P105_LC1_H3K9Me2               |       |              |
| B1   | 4090          | BEA20P105_LC2_H3K9Me2               |       |              |
| C1   | 4320          | BEA20P105_LC3_H3K9Me2               |       |              |
| D1   | 2340          | BEA20P105_LC4_H3K9Me2               |       |              |
| E1   | 2470          | BEA20P105_LC5_H3K9Me2               |       |              |
| F1   | 1870          | BEA20P105_LC6_H3K9Me2               |       |              |
| G1   | 2810          | BEA20P105_LC7_H3K9Me2               |       |              |
| H1   | 1120          | BEA20P105_LC8_H3K9Me2               |       |              |
| A2   | 4890          | BEA20P105_LC9_Input1                |       |              |
| B2   | 3720          | BEA20P105_LC10_Input2               |       |              |
| C2   | 2160          | BEA20P105_LC11_Input3 (non-diluted) |       |              |
| D2   | 5560          | BEA20P105_LC12_Input4               |       |              |
| E2   | 6850          | BEA20P105_LC13_Input5               |       |              |
| F2   | 4770          | BEA20P105_LC14_Input6               |       |              |
| G2   | 5610          | BEA20P105_LC15_Input7               |       |              |
| H2   | 4980          | BEA20P105_LC16_Input8               |       |              |

**A0: Electronic Ladder**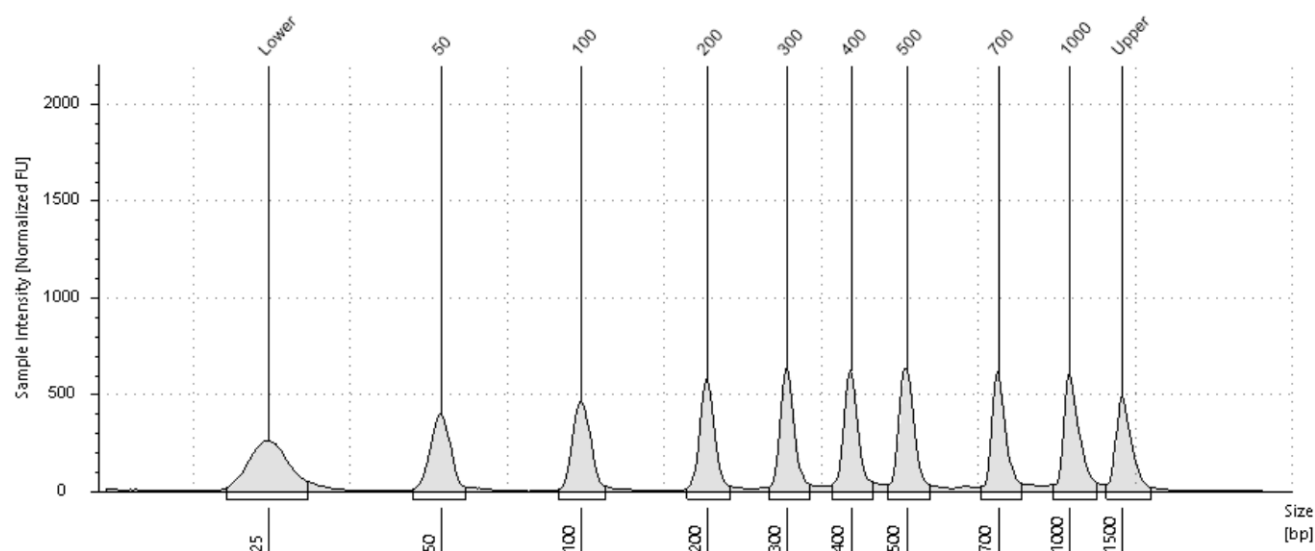**Sample Table**

| Well | Conc. [pg/ul] | Sample Description | Alert | Observations |
|------|---------------|--------------------|-------|--------------|
| A0   | 2350          | Electronic Ladder  |       | Ladder       |

**Peak Table**

| Size [bp] | Calibrated Conc. [pg/ul] | Assigned Conc. [pg/ul] | Peak Molarity [pmol/l] | % Integrated Area | Peak Comment | Observations |
|-----------|--------------------------|------------------------|------------------------|-------------------|--------------|--------------|
| 25        | 340                      | -                      | 20900                  | -                 |              | Lower Marker |
| 50        | 265                      | -                      | 8160                   | 11.28             |              |              |
| 100       | 278                      | -                      | 4270                   | 11.82             |              |              |
| 200       | 290                      | -                      | 2230                   | 12.32             |              |              |
| 300       | 304                      | -                      | 1560                   | 12.95             |              |              |
| 400       | 306                      | -                      | 1180                   | 13.00             |              |              |
| 500       | 312                      | -                      | 961                    | 13.29             |              |              |
| 700       | 286                      | -                      | 629                    | 12.19             |              |              |
| 1000      | 309                      | -                      | 476                    | 13.15             |              |              |
| 1500      | 250                      | 250                    | 256                    | -                 |              | Upper Marker |

## A1: BEA20P105\_LC1\_H3K9Me2

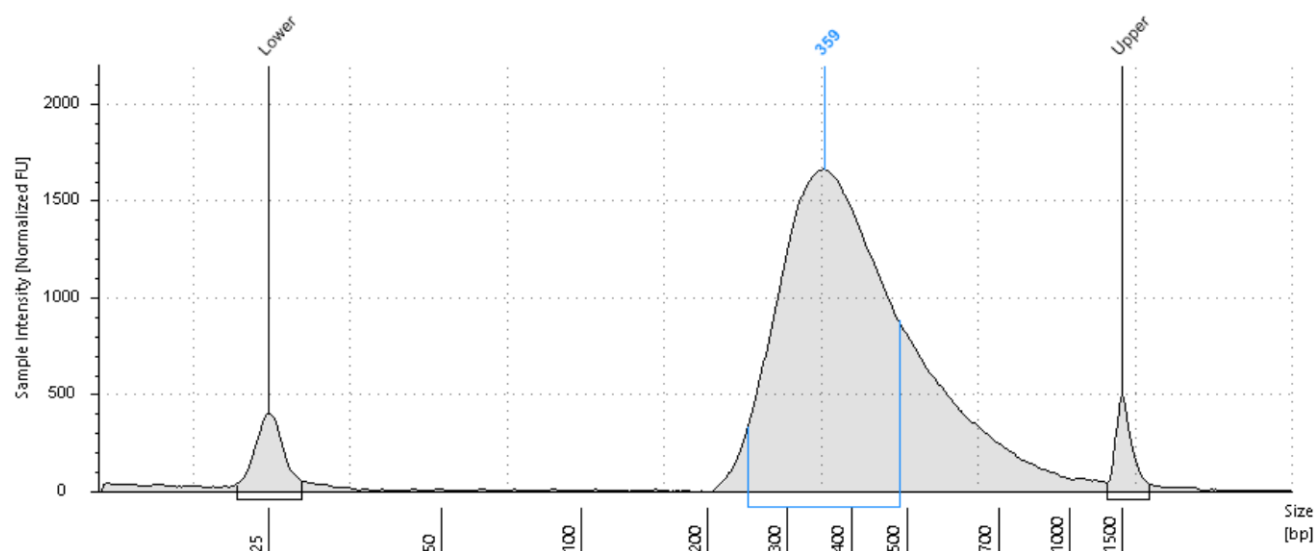

Sample Table

| Well | Conc. [pg/ul] | Sample Description    | Alert | Observations |
|------|---------------|-----------------------|-------|--------------|
| A1   | 5120          | BEA20P105_LC1_H3K9Me2 |       |              |

Peak Table

| Size [bp] | Calibrated Conc. [pg/ul] | Assigned Conc. [pg/ul] | Peak Molarity [pmol/l] | % Integrated Area | Peak Comment | Observations |
|-----------|--------------------------|------------------------|------------------------|-------------------|--------------|--------------|
| 25        | 367                      | -                      | 22600                  | -                 |              | Lower Marker |
| 359       | 5120                     | -                      | 21900                  | 100.00            |              |              |
| 1500      | 250                      | 250                    | 256                    | -                 |              | Upper Marker |

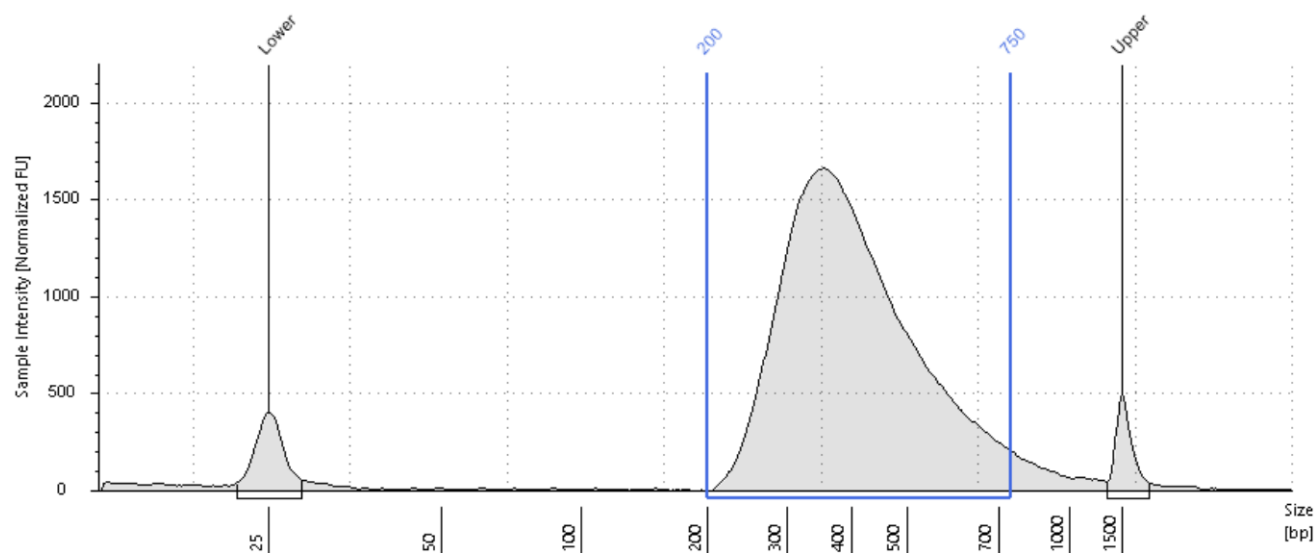

Region Table

| From [bp] | To [bp] | Average Size [bp] | Conc. [pg/ul] | Region Molarity [pmol/l] | % of Total | Region Comment | Color |
|-----------|---------|-------------------|---------------|--------------------------|------------|----------------|-------|
| 200       | 750     | 412               | 6710          | 26900                    | 94.14      |                |       |

**B1: BEA20P105\_LC2\_H3K9Me2**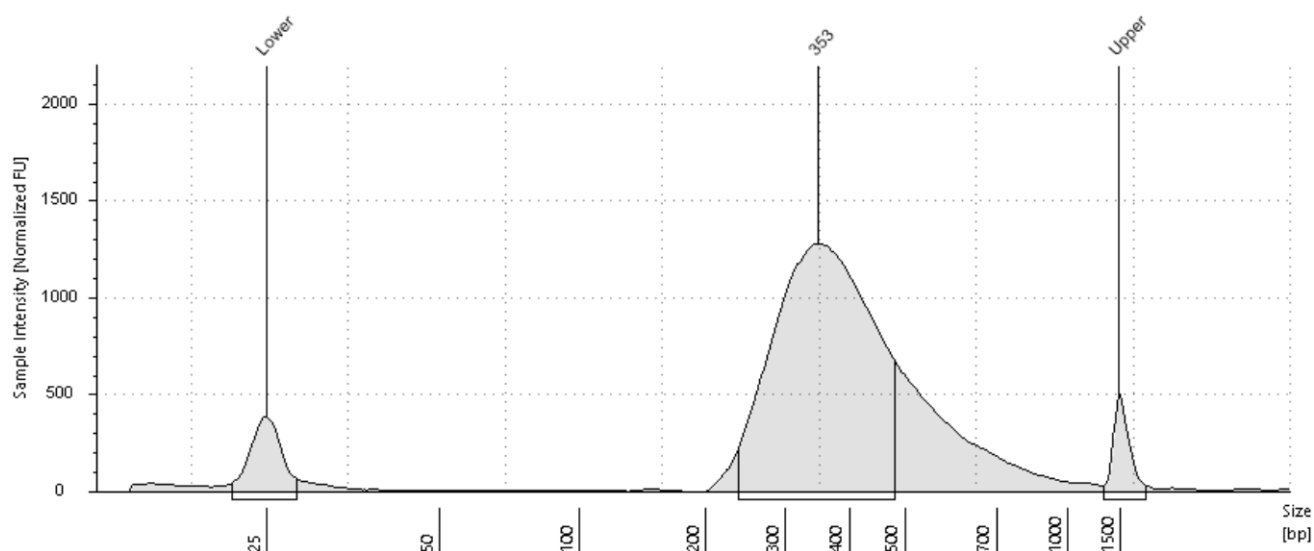**Sample Table**

| Well | Conc. [pg/ul] | Sample Description    | Alert | Observations |
|------|---------------|-----------------------|-------|--------------|
| B1   | 4090          | BEA20P105_LC2_H3K9Me2 |       |              |

**Peak Table**

| Size [bp] | Calibrated Conc. [pg/ul] | Assigned Conc. [pg/ul] | Peak Molarity [pmol/l] | % Integrated Area | Peak Comment | Observations |
|-----------|--------------------------|------------------------|------------------------|-------------------|--------------|--------------|
| 25        | 381                      | -                      | 23500                  | -                 |              | Lower Marker |
| 353       | 4090                     | -                      | 17800                  | 100.00            |              |              |
| 1500      | 250                      | 250                    | 256                    | -                 |              | Upper Marker |

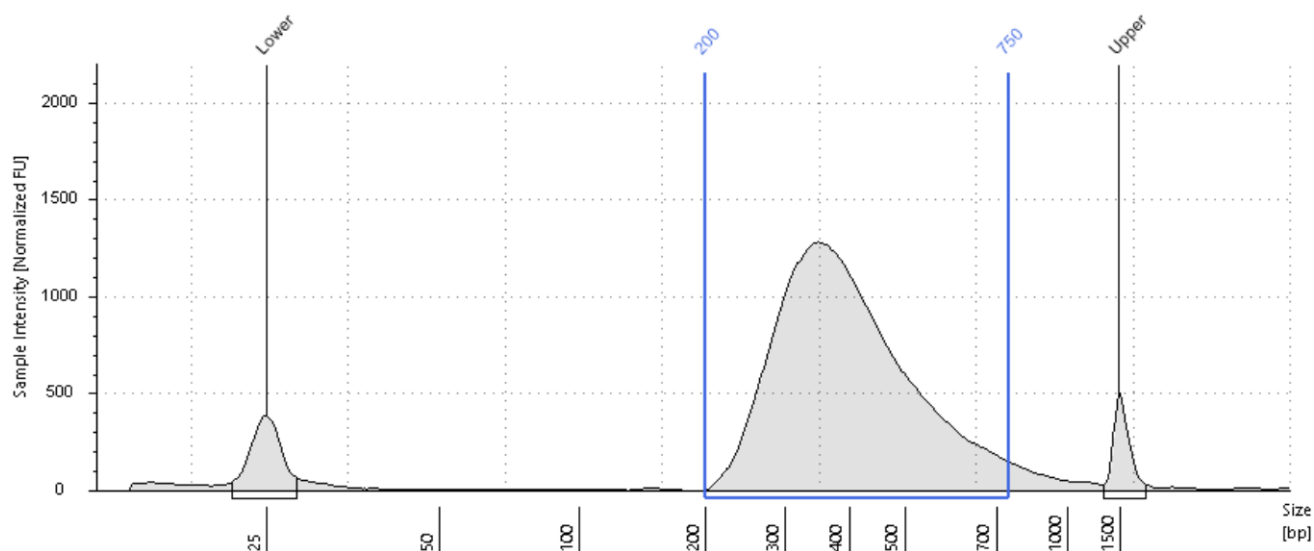**Region Table**

| From [bp] | To [bp] | Average Size [bp] | Conc. [pg/ul] | Region Molarity [pmol/l] | % of Total | Region Comment | Color |
|-----------|---------|-------------------|---------------|--------------------------|------------|----------------|-------|
| 200       | 750     | 406               | 5280          | 21400                    | 93.67      |                |       |

## C1: BEA20P105\_LC3\_H3K9Me2

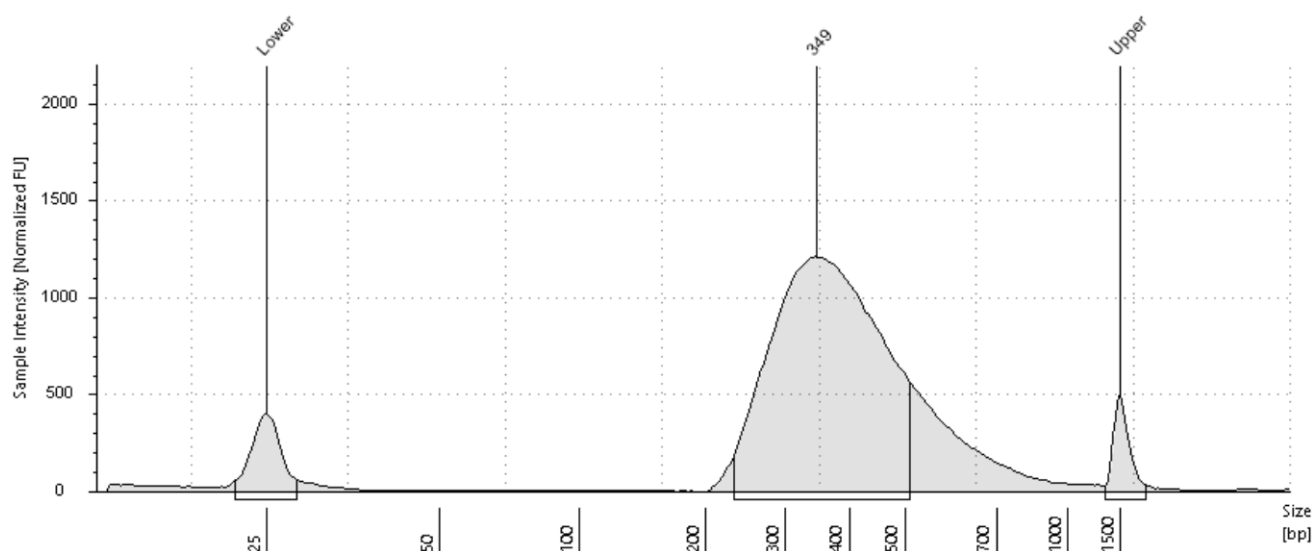

Sample Table

| Well | Conc. [pg/ul] | Sample Description    | Alert | Observations |
|------|---------------|-----------------------|-------|--------------|
| C1   | 4320          | BEA20P105_LC3_H3K9Me2 |       |              |

Peak Table

| Size [bp] | Calibrated Conc. [pg/ul] | Assigned Conc. [pg/ul] | Peak Molarity [pmol/l] | % Integrated Area | Peak Comment | Observations |
|-----------|--------------------------|------------------------|------------------------|-------------------|--------------|--------------|
| 25        | 379                      | -                      | 23400                  | -                 |              | Lower Marker |
| 349       | 4320                     | -                      | 19000                  | 100.00            |              |              |
| 1500      | 250                      | 250                    | 256                    | -                 |              | Upper Marker |

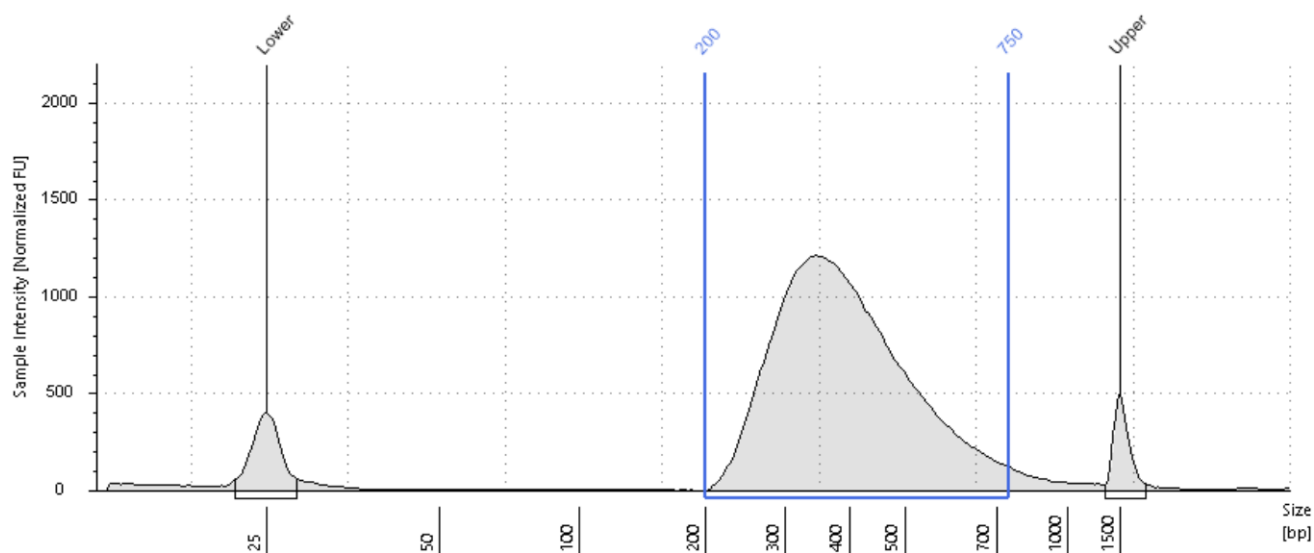

Region Table

| From [bp] | To [bp] | Average Size [bp] | Conc. [pg/ul] | Region Molarity [pmol/l] | % of Total | Region Comment | Color |
|-----------|---------|-------------------|---------------|--------------------------|------------|----------------|-------|
| 200       | 750     | 403               | 5200          | 21300                    | 94.64      |                |       |

**D1: BEA20P105\_LC4\_H3K9Me2**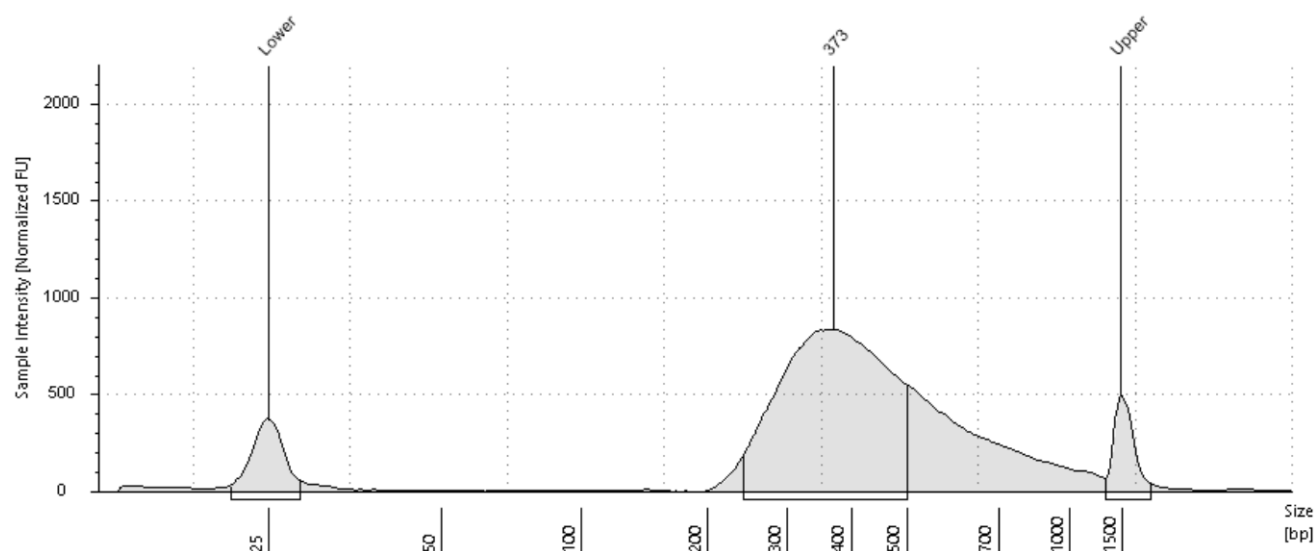**Sample Table**

| Well | Conc. [pg/ul] | Sample Description    | Alert | Observations |
|------|---------------|-----------------------|-------|--------------|
| D1   | 2340          | BEA20P105_LC4_H3K9Me2 |       |              |

**Peak Table**

| Size [bp] | Calibrated Conc. [pg/ul] | Assigned Conc. [pg/ul] | Peak Molarity [pmol/l] | % Integrated Area | Peak Comment | Observations |
|-----------|--------------------------|------------------------|------------------------|-------------------|--------------|--------------|
| 25        | 305                      | -                      | 18800                  | -                 |              | Lower Marker |
| 373       | 2340                     | -                      | 9650                   | 100.00            |              |              |
| 1500      | 250                      | 250                    | 256                    | -                 |              | Upper Marker |

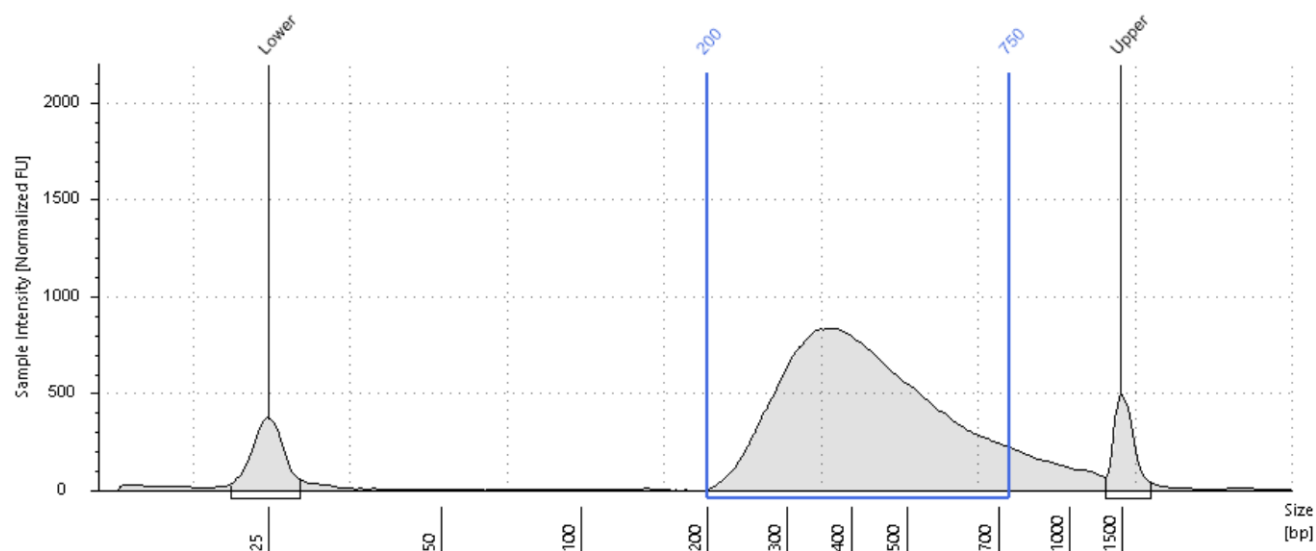**Region Table**

| From [bp] | To [bp] | Average Size [bp] | Conc. [pg/ul] | Region Molarity [pmol/l] | % of Total | Region Comment | Color |
|-----------|---------|-------------------|---------------|--------------------------|------------|----------------|-------|
| 200       | 750     | 429               | 3210          | 12500                    | 89.26      |                |       |

## E1: BEA20P105\_LC5\_H3K9Me2

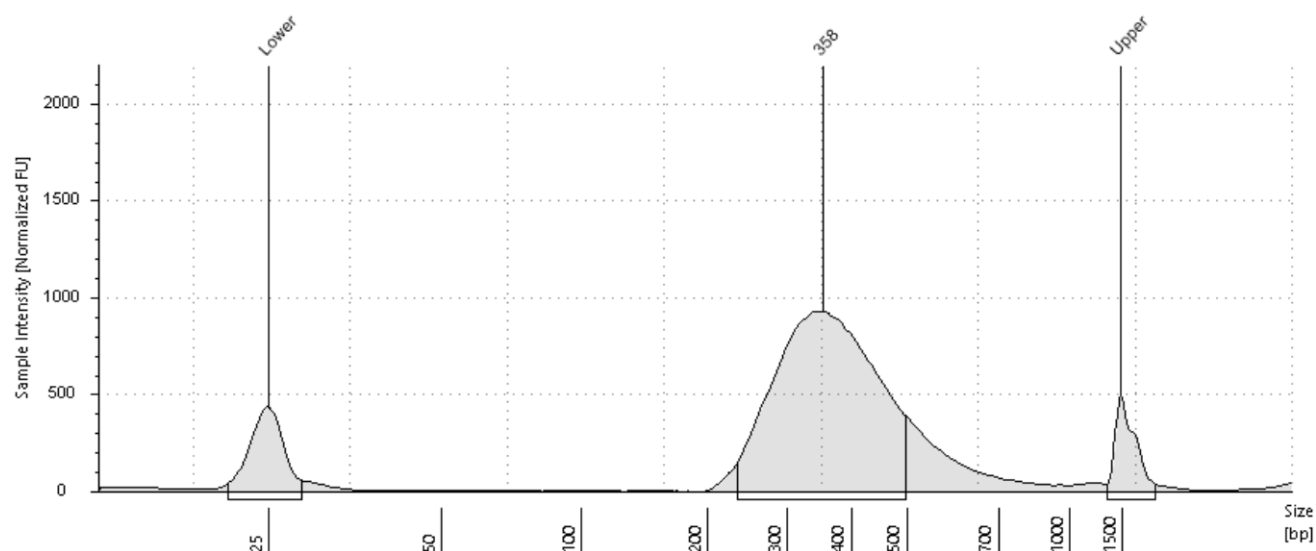

Sample Table

| Well | Conc. [pg/ul] | Sample Description    | Alert | Observations |
|------|---------------|-----------------------|-------|--------------|
| E1   | 2470          | BEA20P105_LC5_H3K9Me2 |       |              |

Peak Table

| Size [bp] | Calibrated Conc. [pg/ul] | Assigned Conc. [pg/ul] | Peak Molarity [pmol/l] | % Integrated Area | Peak Comment | Observations |
|-----------|--------------------------|------------------------|------------------------|-------------------|--------------|--------------|
| 25        | 375                      | -                      | 23100                  | -                 |              | Lower Marker |
| 358       | 2470                     | -                      | 10600                  | 100.00            |              |              |
| 1500      | 250                      | 250                    | 256                    | -                 |              | Upper Marker |

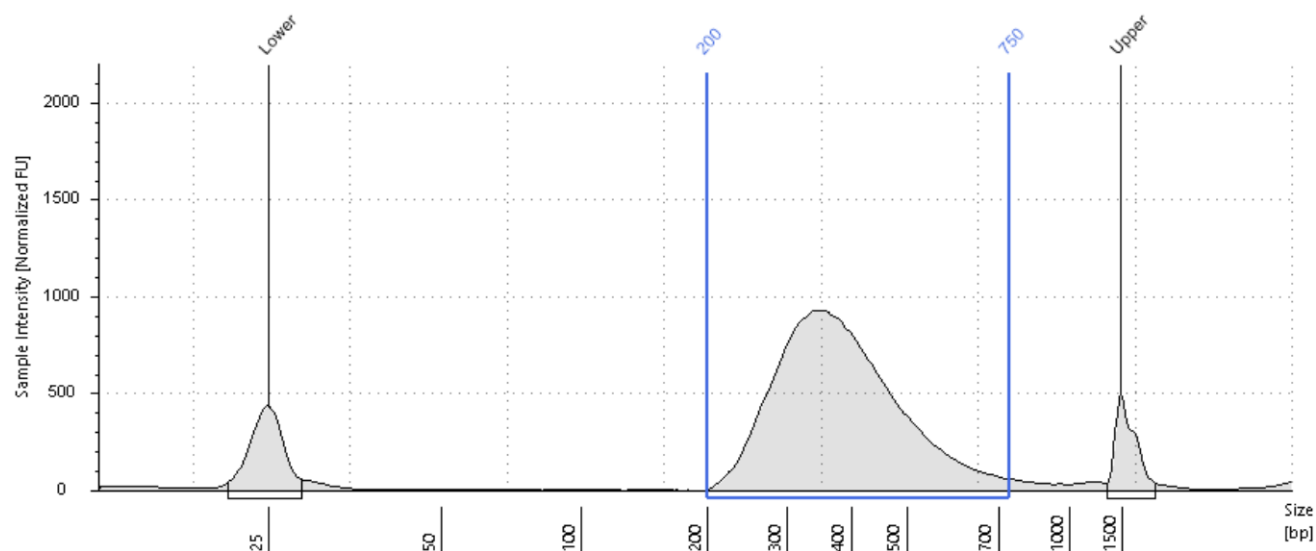

Region Table

| From [bp] | To [bp] | Average Size [bp] | Conc. [pg/ul] | Region Molarity [pmol/l] | % of Total | Region Comment | Color |
|-----------|---------|-------------------|---------------|--------------------------|------------|----------------|-------|
| 200       | 750     | 393               | 2900          | 12100                    | 93.56      |                |       |

## F1: BEA20P105\_LC6\_H3K9Me2

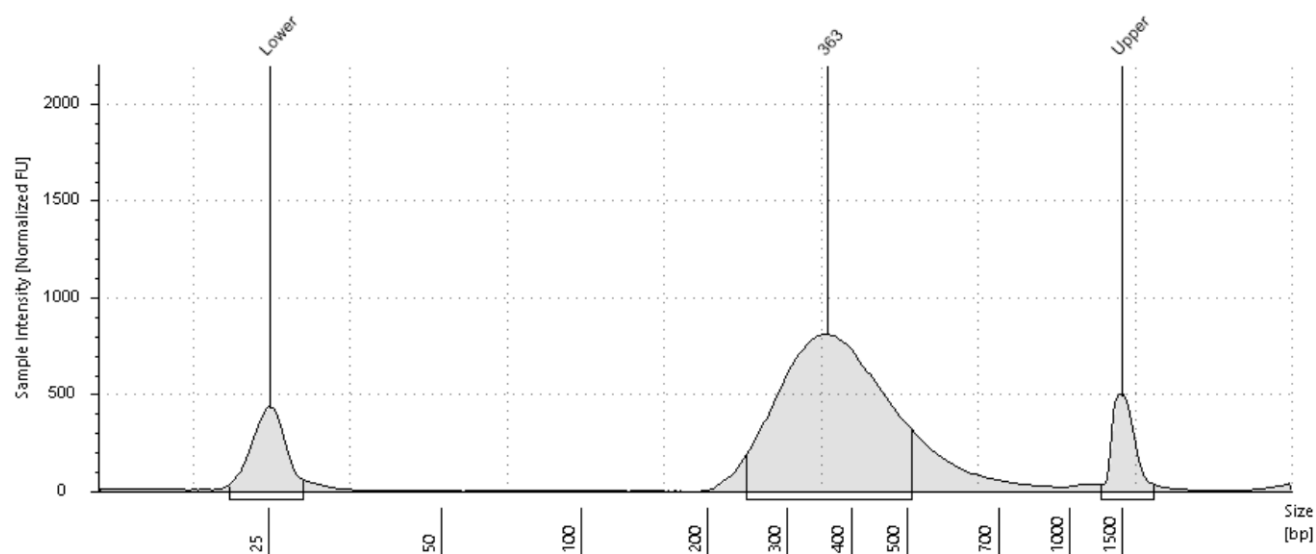

Sample Table

| Well | Conc. [pg/ul] | Sample Description    | Alert | Observations |
|------|---------------|-----------------------|-------|--------------|
| F1   | 1870          | BEA20P105_LC6_H3K9Me2 |       |              |

Peak Table

| Size [bp] | Calibrated Conc. [pg/ul] | Assigned Conc. [pg/ul] | Peak Molarity [pmol/l] | % Integrated Area | Peak Comment | Observations |
|-----------|--------------------------|------------------------|------------------------|-------------------|--------------|--------------|
| 25        | 334                      | -                      | 20600                  | -                 |              | Lower Marker |
| 363       | 1870                     | -                      | 7920                   | 100.00            |              |              |
| 1500      | 250                      | 250                    | 256                    | -                 |              | Upper Marker |

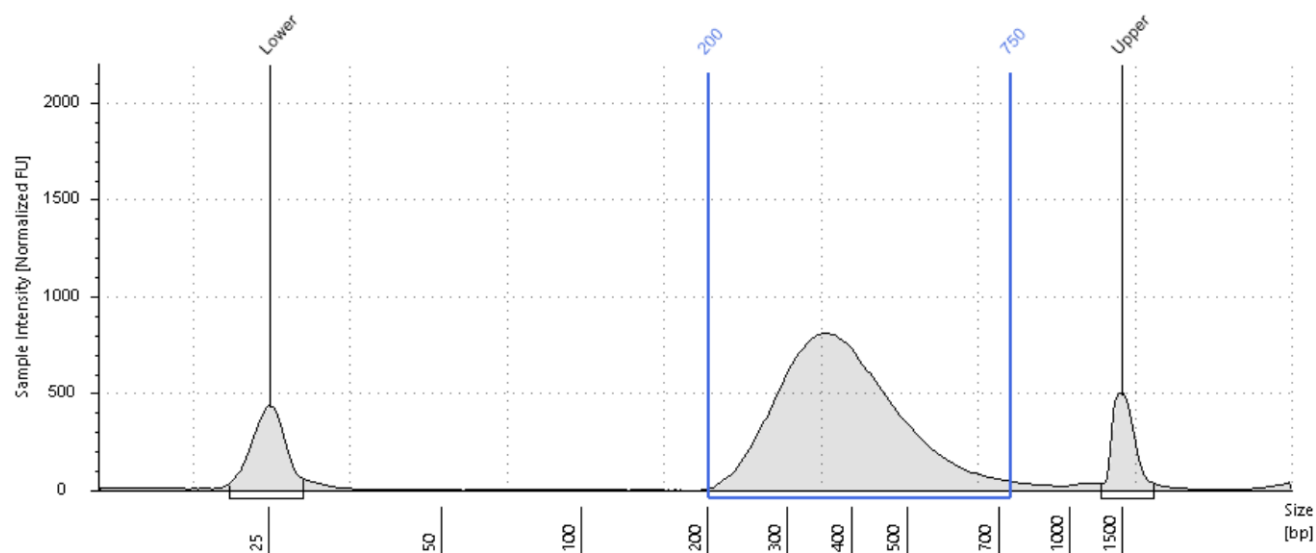

Region Table

| From [bp] | To [bp] | Average Size [bp] | Conc. [pg/ul] | Region Molarity [pmol/l] | % of Total | Region Comment | Color |
|-----------|---------|-------------------|---------------|--------------------------|------------|----------------|-------|
| 200       | 750     | 394               | 2180          | 9070                     | 94.37      |                |       |



## G1: BEA20P105\_LC7\_H3K9Me2

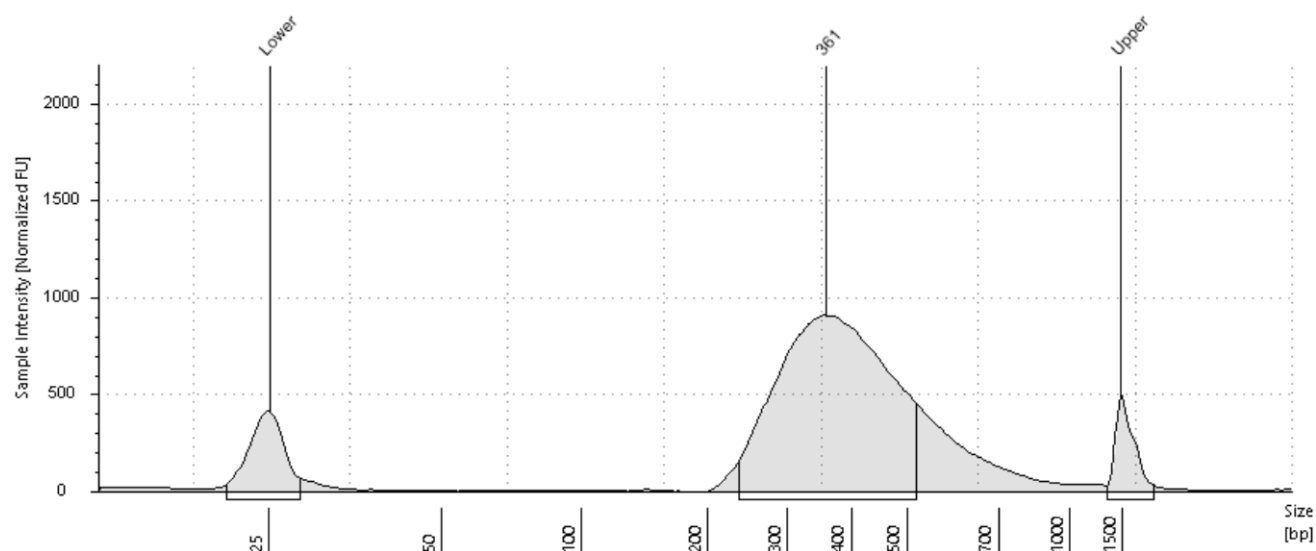

Sample Table

| Well | Conc. [pg/ul] | Sample Description    | Alert | Observations |
|------|---------------|-----------------------|-------|--------------|
| G1   | 2810          | BEA20P105_LC7_H3K9Me2 |       |              |

Peak Table

| Size [bp] | Calibrated Conc. [pg/ul] | Assigned Conc. [pg/ul] | Peak Molarity [pmol/l] | % Integrated Area | Peak Comment | Observations |
|-----------|--------------------------|------------------------|------------------------|-------------------|--------------|--------------|
| 25        | 399                      | -                      | 24600                  | -                 |              | Lower Marker |
| 361       | 2810                     | -                      | 12000                  | 100.00            |              |              |
| 1500      | 250                      | 250                    | 256                    | -                 |              | Upper Marker |

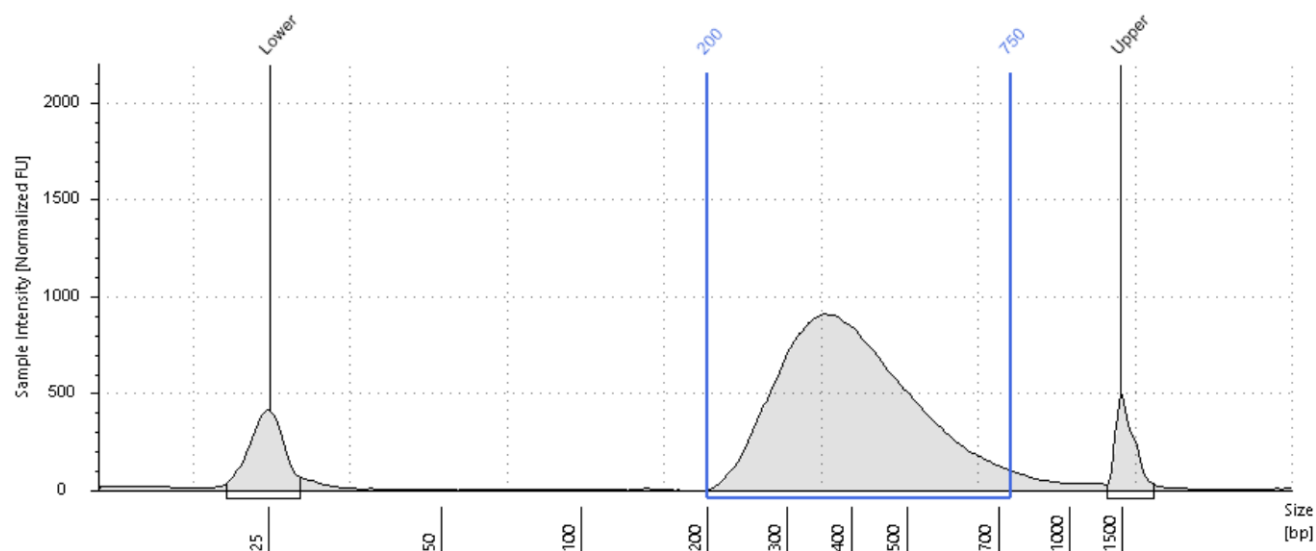

Region Table

| From [bp] | To [bp] | Average Size [bp] | Conc. [pg/ul] | Region Molarity [pmol/l] | % of Total | Region Comment | Color |
|-----------|---------|-------------------|---------------|--------------------------|------------|----------------|-------|
| 200       | 750     | 410               | 3410          | 13700                    | 93.83      |                |       |

## H1: BEA20P105\_LC8\_H3K9Me2

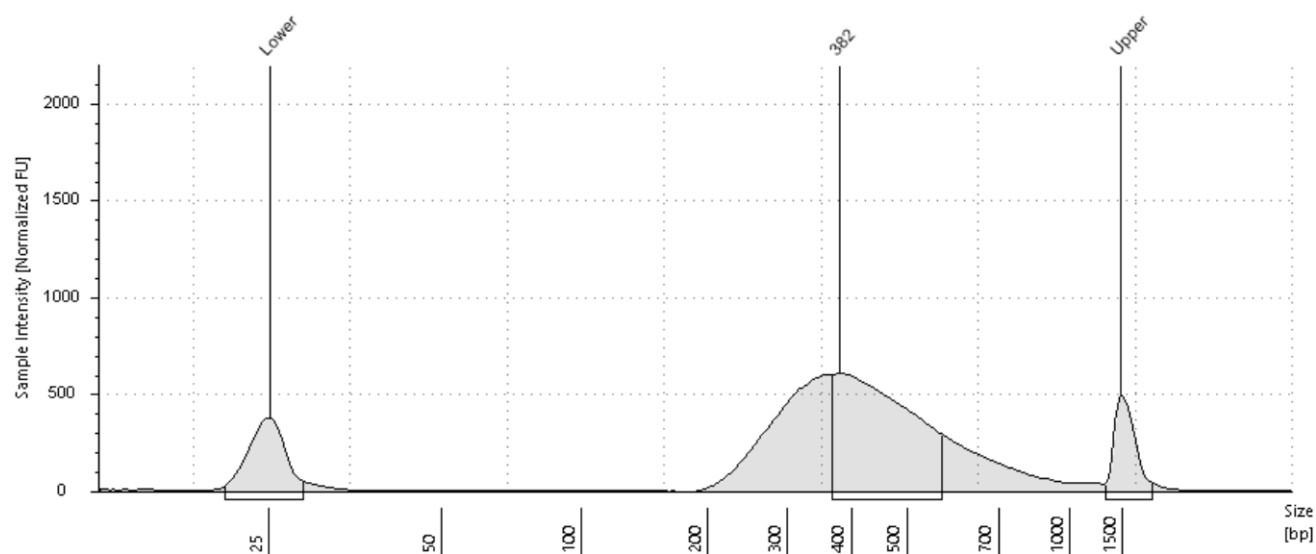

Sample Table

| Well | Conc. [pg/ul] | Sample Description    | Alert | Observations |
|------|---------------|-----------------------|-------|--------------|
| H1   | 1120          | BEA20P105_LC8_H3K9Me2 |       |              |

Peak Table

| Size [bp] | Calibrated Conc. [pg/ul] | Assigned Conc. [pg/ul] | Peak Molarity [pmol/l] | % Integrated Area | Peak Comment | Observations |
|-----------|--------------------------|------------------------|------------------------|-------------------|--------------|--------------|
| 25        | 338                      | -                      | 20800                  | -                 |              | Lower Marker |
| 382       | 1120                     | -                      | 4510                   | 100.00            |              |              |
| 1500      | 250                      | 250                    | 256                    | -                 |              | Upper Marker |

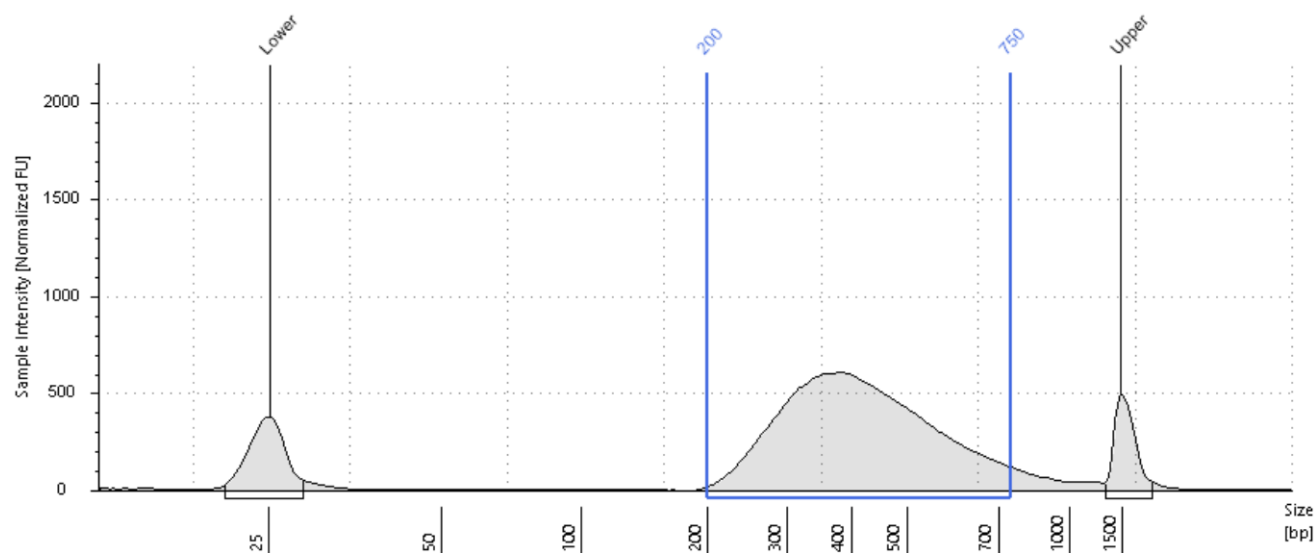

Region Table

| From [bp] | To [bp] | Average Size [bp] | Conc. [pg/ul] | Region Molarity [pmol/l] | % of Total | Region Comment | Color |
|-----------|---------|-------------------|---------------|--------------------------|------------|----------------|-------|
| 200       | 750     | 424               | 2250          | 8860                     | 92.36      |                |       |

## A2: BEA20P105\_LC9\_Input1

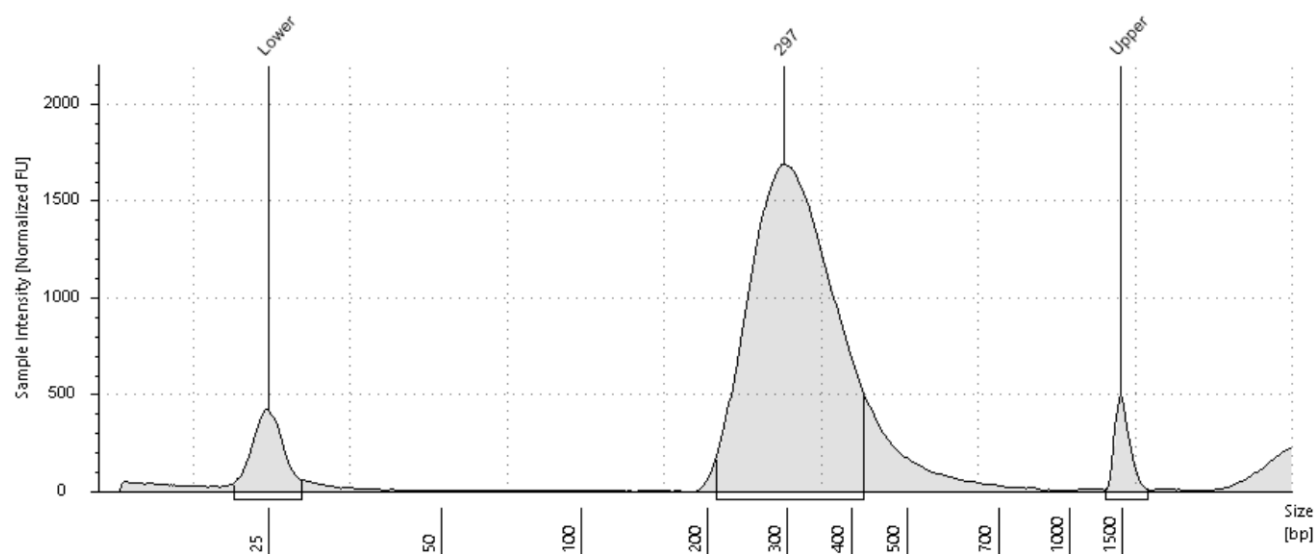

Sample Table

| Well | Conc. [pg/ul] | Sample Description   | Alert | Observations |
|------|---------------|----------------------|-------|--------------|
| A2   | 4890          | BEA20P105_LC9_Input1 |       |              |

Peak Table

| Size [bp] | Calibrated Conc. [pg/ul] | Assigned Conc. [pg/ul] | Peak Molarity [pmol/l] | % Integrated Area | Peak Comment | Observations |
|-----------|--------------------------|------------------------|------------------------|-------------------|--------------|--------------|
| 25        | 456                      | -                      | 28100                  | -                 |              | Lower Marker |
| 297       | 4890                     | -                      | 25300                  | 100.00            |              |              |
| 1500      | 250                      | 250                    | 256                    | -                 |              | Upper Marker |

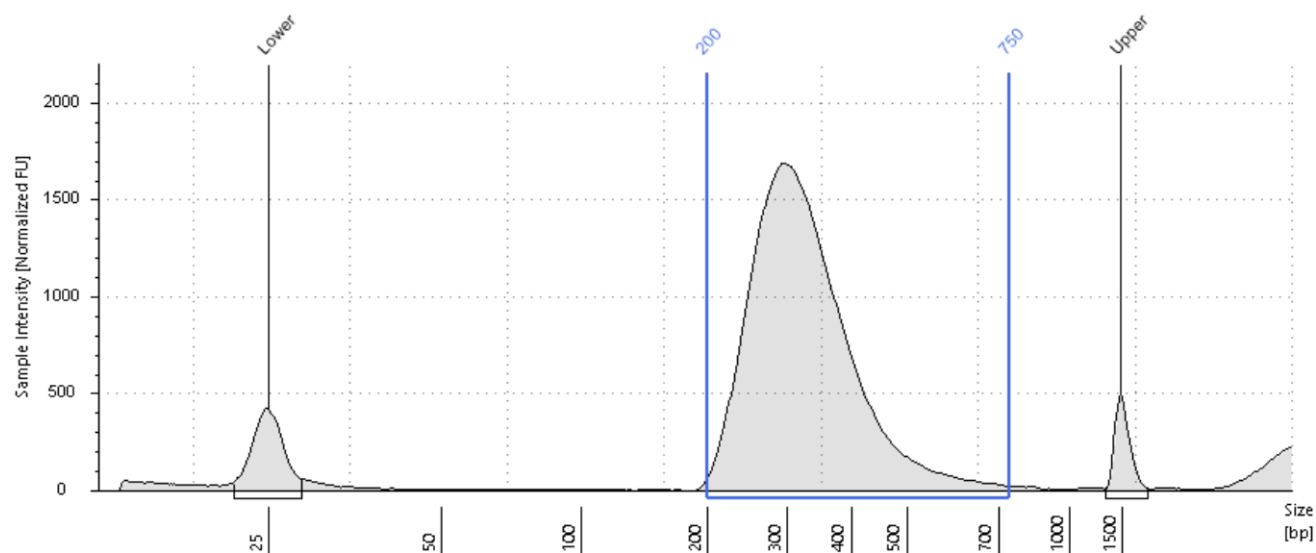

Region Table

| From [bp] | To [bp] | Average Size [bp] | Conc. [pg/ul] | Region Molarity [pmol/l] | % of Total | Region Comment | Color |
|-----------|---------|-------------------|---------------|--------------------------|------------|----------------|-------|
| 200       | 750     | 334               | 5520          | 26800                    | 91.63      |                |       |

**B2: BEA20P105\_LC10\_Input2**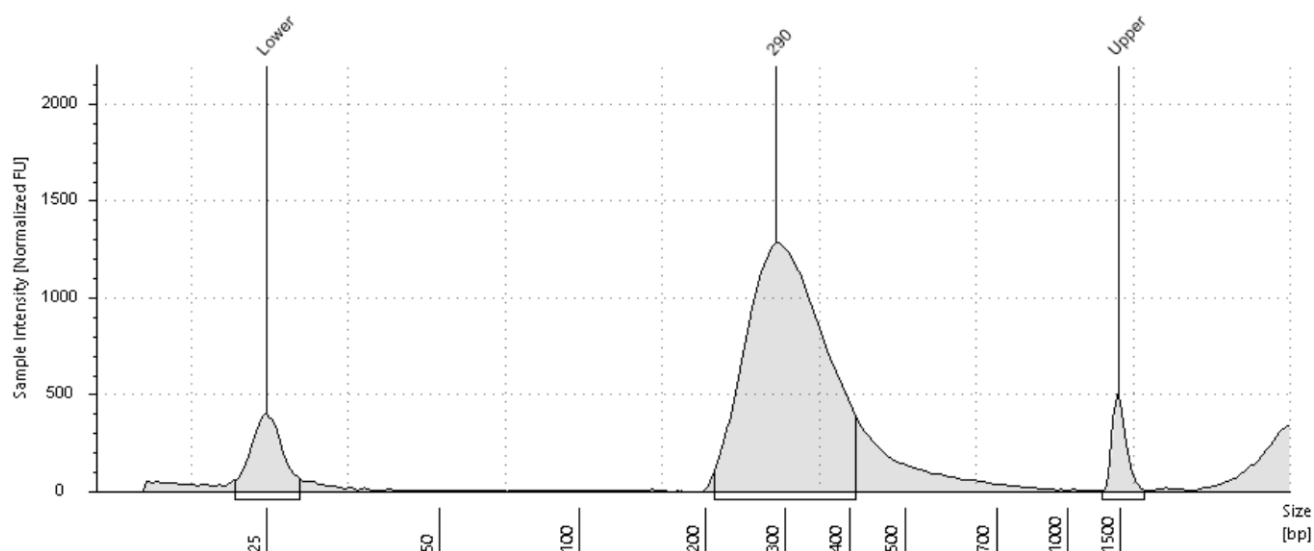**Sample Table**

| Well | Conc. [pg/ul] | Sample Description    | Alert | Observations |
|------|---------------|-----------------------|-------|--------------|
| B2   | 3720          | BEA20P105_LC10_Input2 |       |              |

**Peak Table**

| Size [bp] | Calibrated Conc. [pg/ul] | Assigned Conc. [pg/ul] | Peak Molarity [pmol/l] | % Integrated Area | Peak Comment | Observations |
|-----------|--------------------------|------------------------|------------------------|-------------------|--------------|--------------|
| 25        | 460                      | -                      | 28300                  | -                 |              | Lower Marker |
| 290       | 3720                     | -                      | 19800                  | 100.00            |              |              |
| 1500      | 250                      | 250                    | 256                    | -                 |              | Upper Marker |

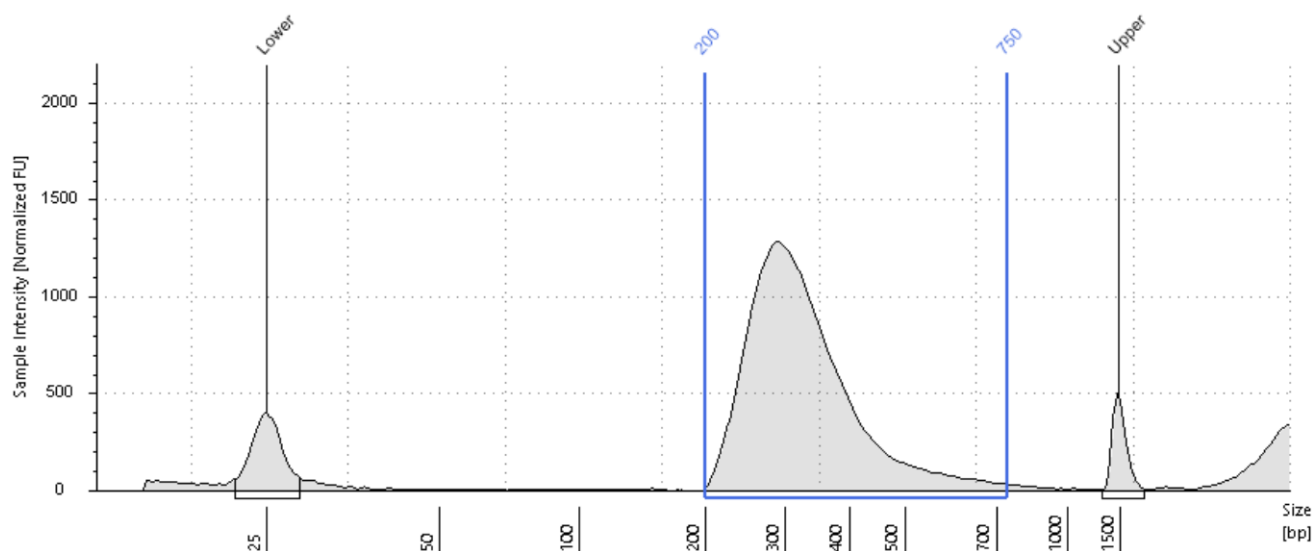**Region Table**

| From [bp] | To [bp] | Average Size [bp] | Conc. [pg/ul] | Region Molarity [pmol/l] | % of Total | Region Comment | Color |
|-----------|---------|-------------------|---------------|--------------------------|------------|----------------|-------|
| 200       | 750     | 336               | 4320          | 21000                    | 85.59      |                |       |

**C2: BEA20P105\_LC11\_Input3 (non-diluted)**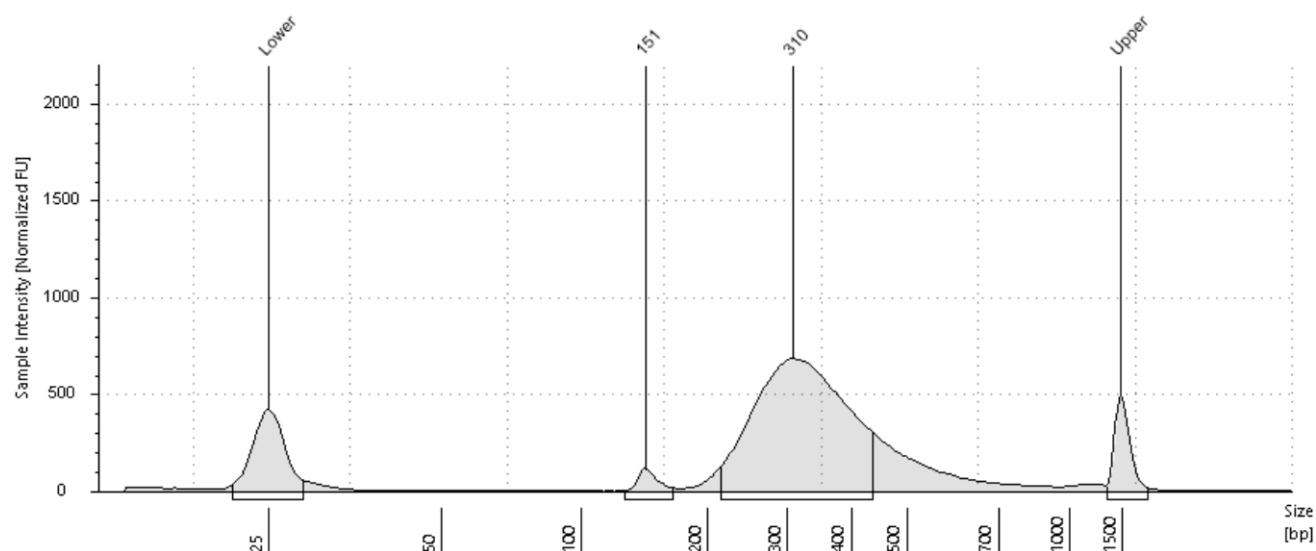**Sample Table**

| Well | Conc. [pg/ul] | Sample Description                  | Alert | Observations |
|------|---------------|-------------------------------------|-------|--------------|
| C2   | 2160          | BEA20P105_LC11_Input3 (non-diluted) |       |              |

**Peak Table**

| Size [bp] | Calibrated Conc. [pg/ul] | Assigned Conc. [pg/ul] | Peak Molarity [pmol/l] | % Integrated Area | Peak Comment | Observations |
|-----------|--------------------------|------------------------|------------------------|-------------------|--------------|--------------|
| 25        | 447                      | -                      | 27500                  | -                 |              | Lower Marker |
| 151       | 75.0                     | -                      | 762                    | 3.47              |              |              |
| 310       | 2090                     | -                      | 10400                  | 96.53             |              |              |
| 1500      | 250                      | 250                    | 256                    | -                 |              | Upper Marker |

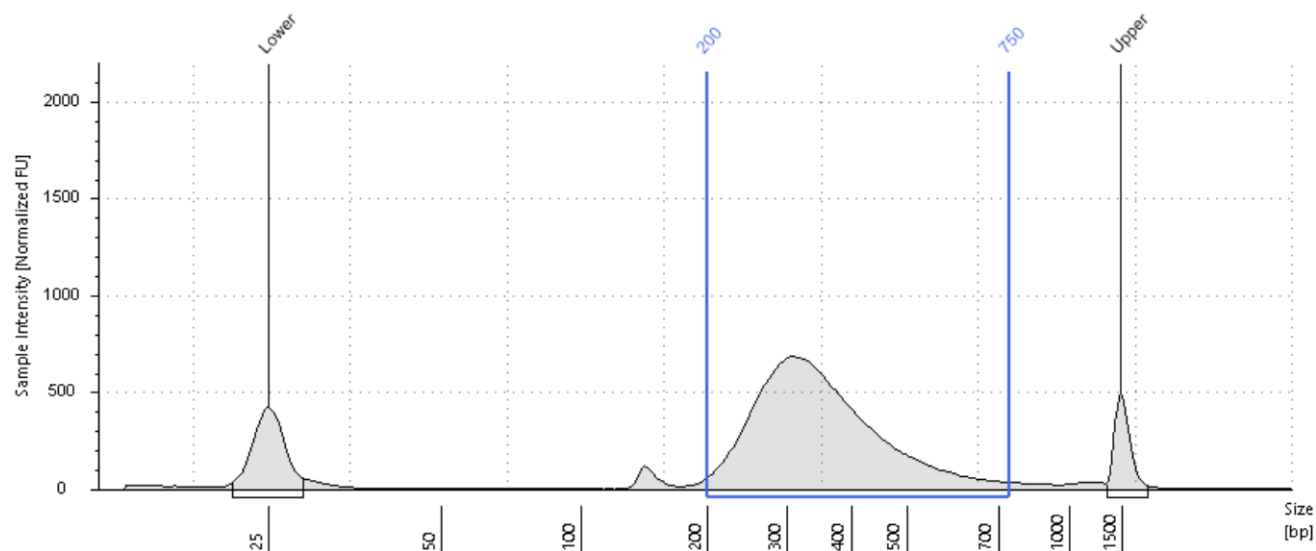**Region Table**

| From [bp] | To [bp] | Average Size [bp] | Conc. [pg/ul] | Region Molarity [pmol/l] | % of Total | Region Comment | Color |
|-----------|---------|-------------------|---------------|--------------------------|------------|----------------|-------|
| 200       | 750     | 361               | 2590          | 11900                    | 90.77      |                |       |

**D2: BEA20P105\_LC12\_Input4**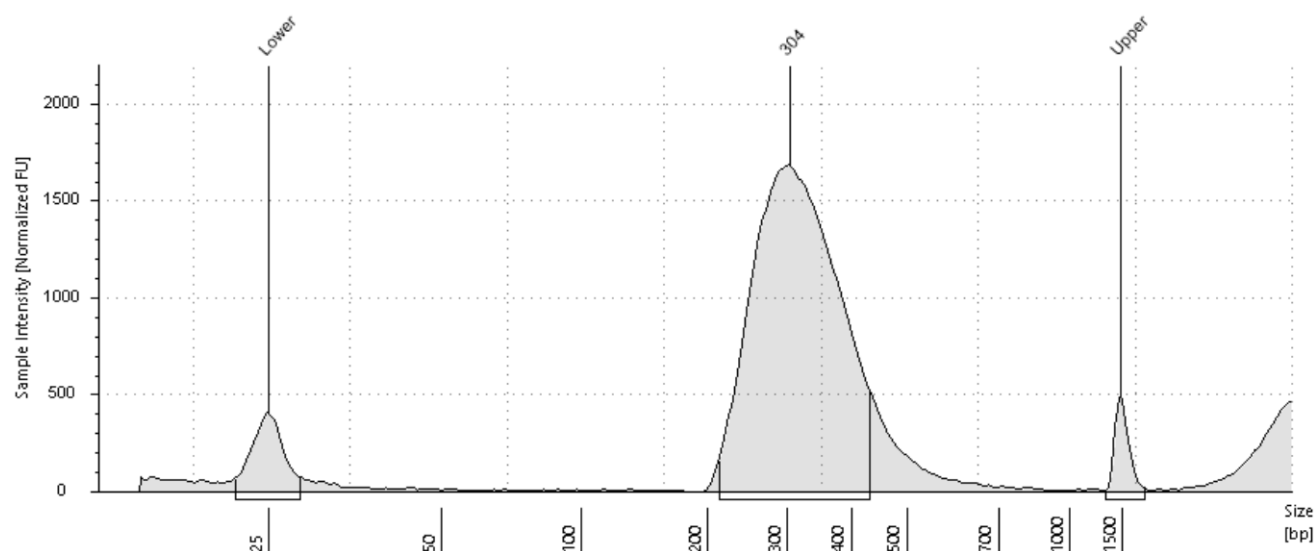**Sample Table**

| Well | Conc. [pg/ul] | Sample Description    | Alert | Observations |
|------|---------------|-----------------------|-------|--------------|
| D2   | 5560          | BEA20P105_LC12_Input4 |       |              |

**Peak Table**

| Size [bp] | Calibrated Conc. [pg/ul] | Assigned Conc. [pg/ul] | Peak Molarity [pmol/l] | % Integrated Area | Peak Comment | Observations |
|-----------|--------------------------|------------------------|------------------------|-------------------|--------------|--------------|
| 25        | 476                      | -                      | 29300                  | -                 |              | Lower Marker |
| 304       | 5560                     | -                      | 28100                  | 100.00            |              |              |
| 1500      | 250                      | 250                    | 256                    | -                 |              | Upper Marker |

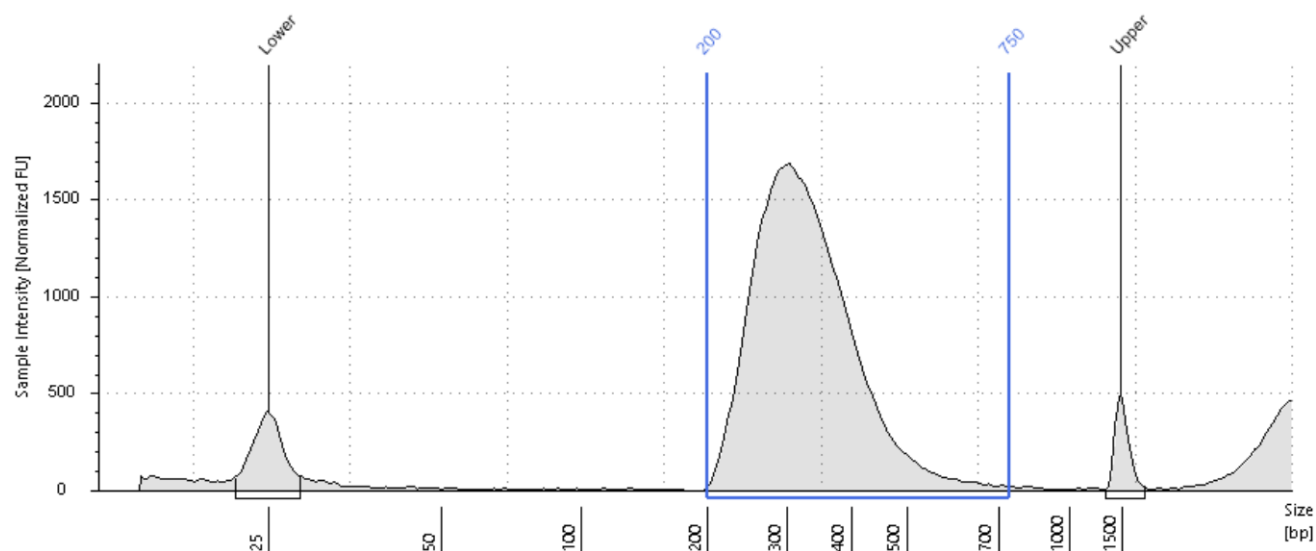**Region Table**

| From [bp] | To [bp] | Average Size [bp] | Conc. [pg/ul] | Region Molarity [pmol/l] | % of Total | Region Comment | Color |
|-----------|---------|-------------------|---------------|--------------------------|------------|----------------|-------|
| 200       | 750     | 337               | 6180          | 29700                    | 85.22      |                |       |

## E2: BEA20P105\_LC13\_Input5

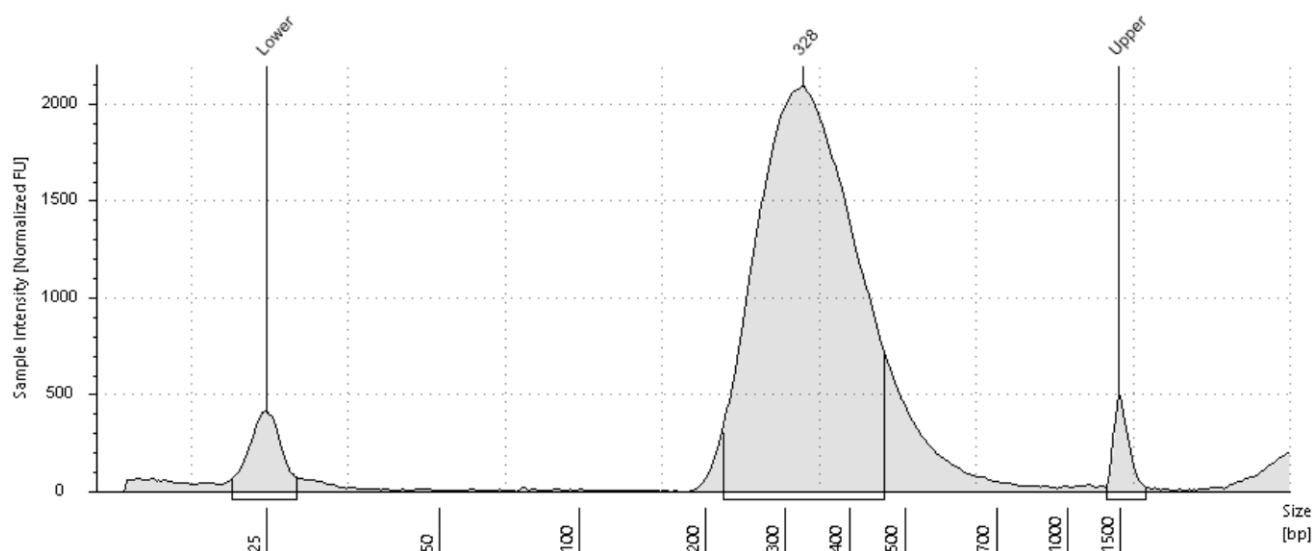

Sample Table

| Well | Conc. [pg/ul] | Sample Description    | Alert | Observations |
|------|---------------|-----------------------|-------|--------------|
| E2   | 6850          | BEA20P105_LC13_Input5 |       |              |

Peak Table

| Size [bp] | Calibrated Conc. [pg/ul] | Assigned Conc. [pg/ul] | Peak Molarity [pmol/l] | % Integrated Area | Peak Comment | Observations |
|-----------|--------------------------|------------------------|------------------------|-------------------|--------------|--------------|
| 25        | 446                      | -                      | 27500                  | -                 |              | Lower Marker |
| 328       | 6850                     | -                      | 32100                  | 100.00            |              |              |
| 1500      | 250                      | 250                    | 256                    | -                 |              | Upper Marker |

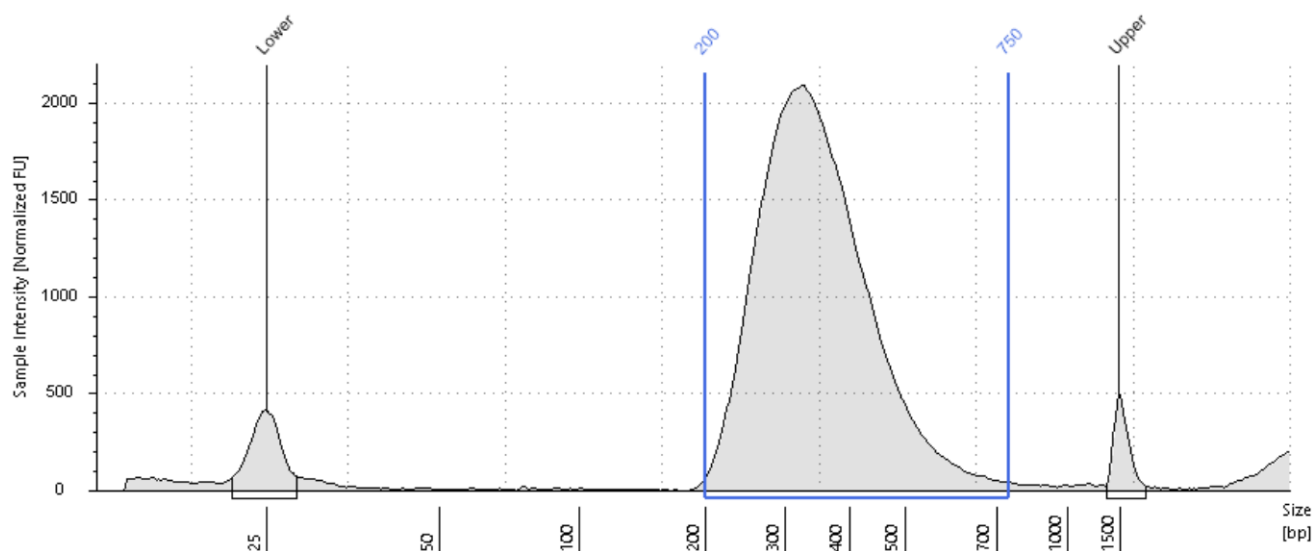

Region Table

| From [bp] | To [bp] | Average Size [bp] | Conc. [pg/ul] | Region Molarity [pmol/l] | % of Total | Region Comment | Color |
|-----------|---------|-------------------|---------------|--------------------------|------------|----------------|-------|
| 200       | 750     | 357               | 7750          | 35400                    | 93.50      |                |       |

## F2: BEA20P105\_LC14\_Input6

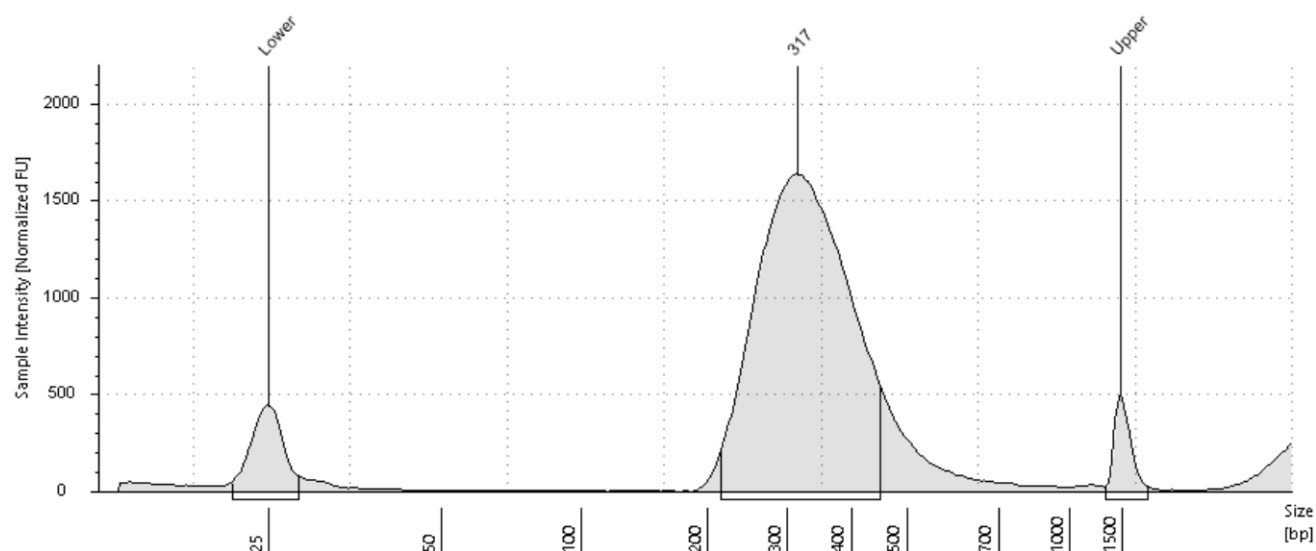

Sample Table

| Well | Conc. [pg/ul] | Sample Description    | Alert | Observations |
|------|---------------|-----------------------|-------|--------------|
| F2   | 4770          | BEA20P105_LC14_Input6 |       |              |

Peak Table

| Size [bp] | Calibrated Conc. [pg/ul] | Assigned Conc. [pg/ul] | Peak Molarity [pmol/l] | % Integrated Area | Peak Comment | Observations |
|-----------|--------------------------|------------------------|------------------------|-------------------|--------------|--------------|
| 25        | 445                      | -                      | 27400                  | -                 |              | Lower Marker |
| 317       | 4770                     | -                      | 23200                  | 100.00            |              |              |
| 1500      | 250                      | 250                    | 256                    | -                 |              | Upper Marker |

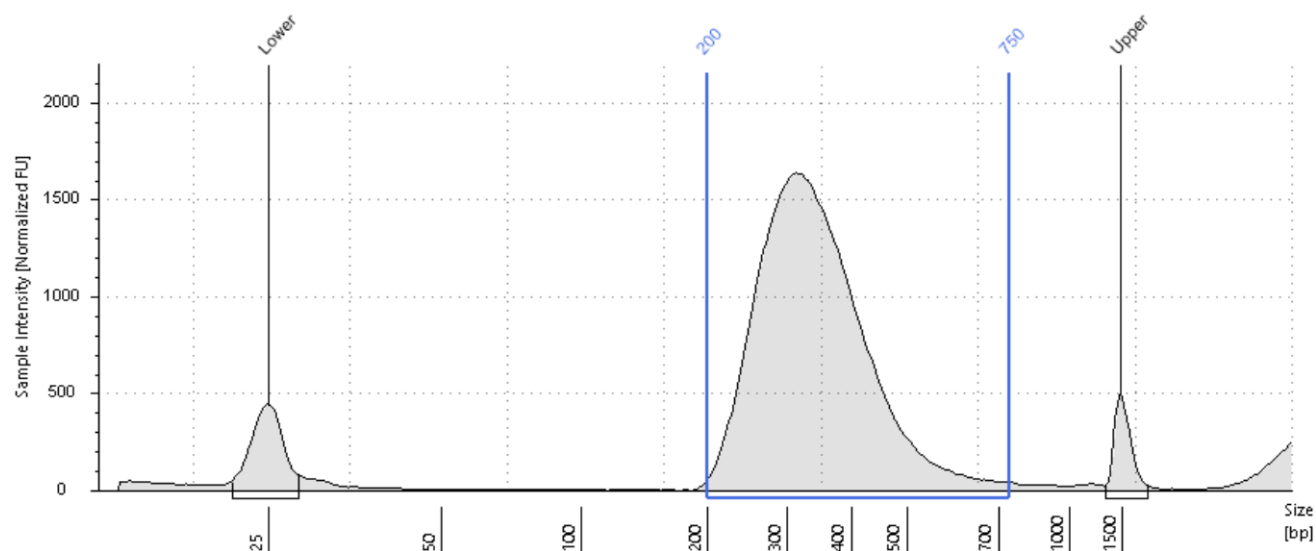

Region Table

| From [bp] | To [bp] | Average Size [bp] | Conc. [pg/ul] | Region Molarity [pmol/l] | % of Total | Region Comment | Color |
|-----------|---------|-------------------|---------------|--------------------------|------------|----------------|-------|
| 200       | 750     | 350               | 5360          | 24900                    | 91.68      |                |       |



## G2: BEA20P105\_LC15\_Input7

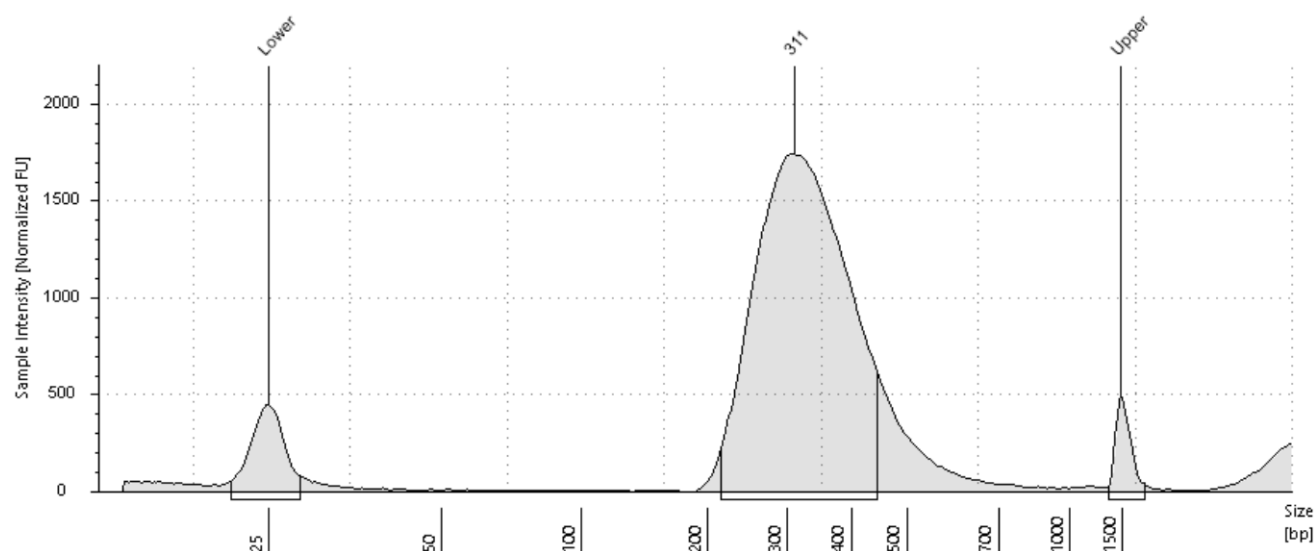

Sample Table

| Well | Conc. [pg/ul] | Sample Description    | Alert | Observations |
|------|---------------|-----------------------|-------|--------------|
| G2   | 5610          | BEA20P105_LC15_Input7 |       |              |

Peak Table

| Size [bp] | Calibrated Conc. [pg/ul] | Assigned Conc. [pg/ul] | Peak Molarity [pmol/l] | % Integrated Area | Peak Comment | Observations |
|-----------|--------------------------|------------------------|------------------------|-------------------|--------------|--------------|
| 25        | 509                      | -                      | 31300                  | -                 |              | Lower Marker |
| 311       | 5610                     | -                      | 27800                  | 100.00            |              |              |
| 1500      | 250                      | 250                    | 256                    | -                 |              | Upper Marker |

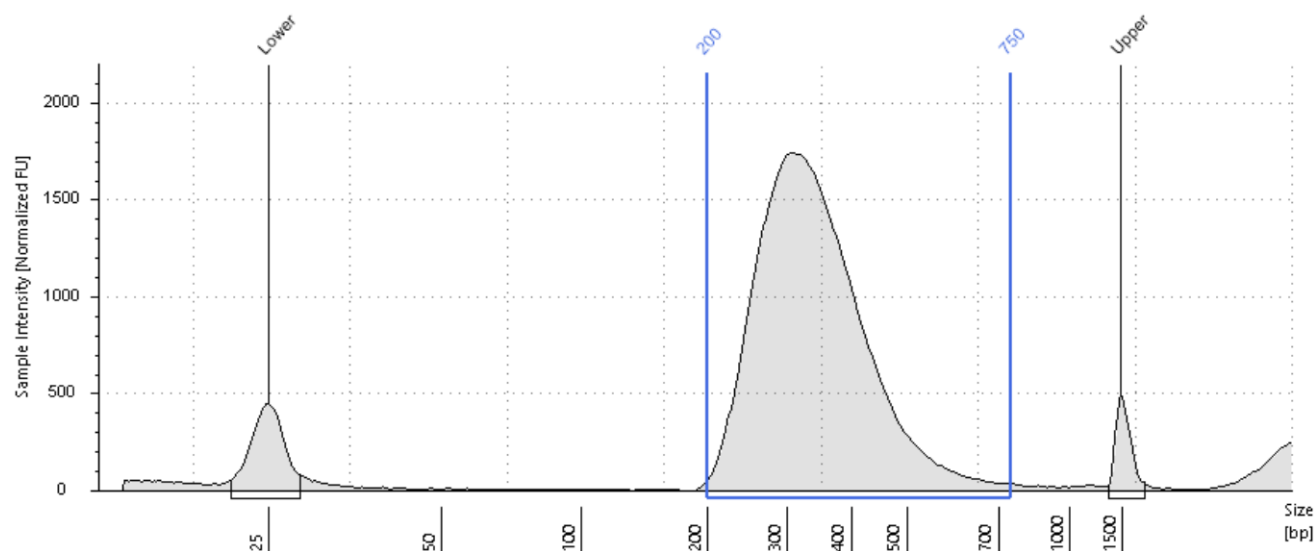

Region Table

| From [bp] | To [bp] | Average Size [bp] | Conc. [pg/ul] | Region Molarity [pmol/l] | % of Total | Region Comment | Color |
|-----------|---------|-------------------|---------------|--------------------------|------------|----------------|-------|
| 200       | 750     | 348               | 6360          | 29700                    | 91.77      |                |       |

## H2: BEA20P105\_LC16\_Input8

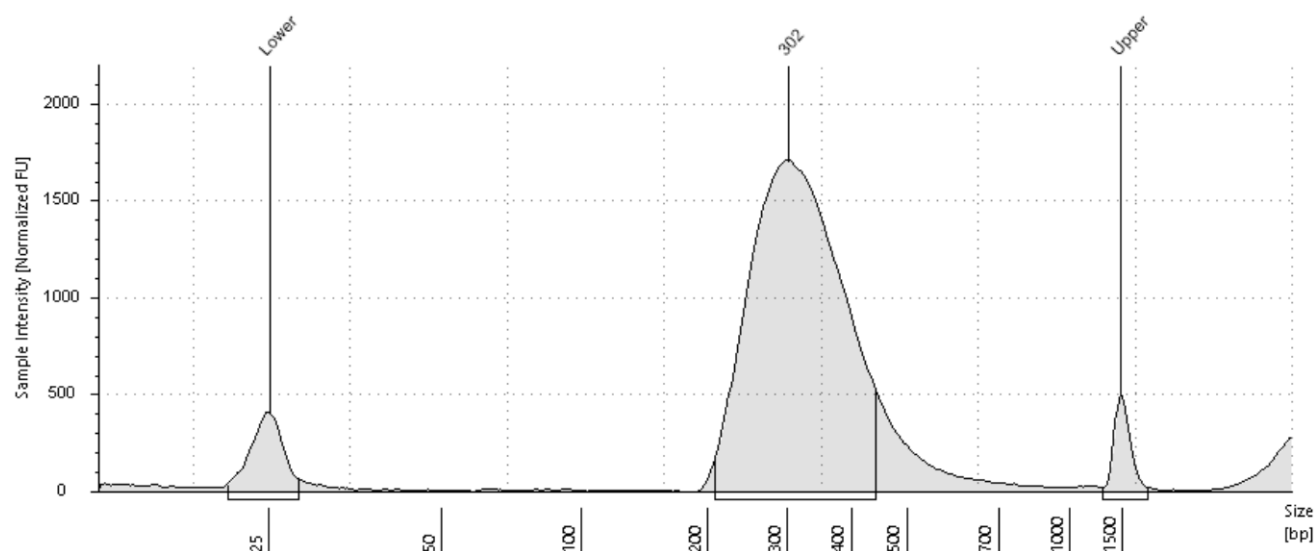

Sample Table

| Well | Conc. [pg/ul] | Sample Description    | Alert | Observations |
|------|---------------|-----------------------|-------|--------------|
| H2   | 4980          | BEA20P105_LC16_Input8 |       |              |

Peak Table

| Size [bp] | Calibrated Conc. [pg/ul] | Assigned Conc. [pg/ul] | Peak Molarity [pmol/l] | % Integrated Area | Peak Comment | Observations |
|-----------|--------------------------|------------------------|------------------------|-------------------|--------------|--------------|
| 25        | 411                      | -                      | 25300                  | -                 |              | Lower Marker |
| 302       | 4980                     | -                      | 25400                  | 100.00            |              |              |
| 1500      | 250                      | 250                    | 256                    | -                 |              | Upper Marker |

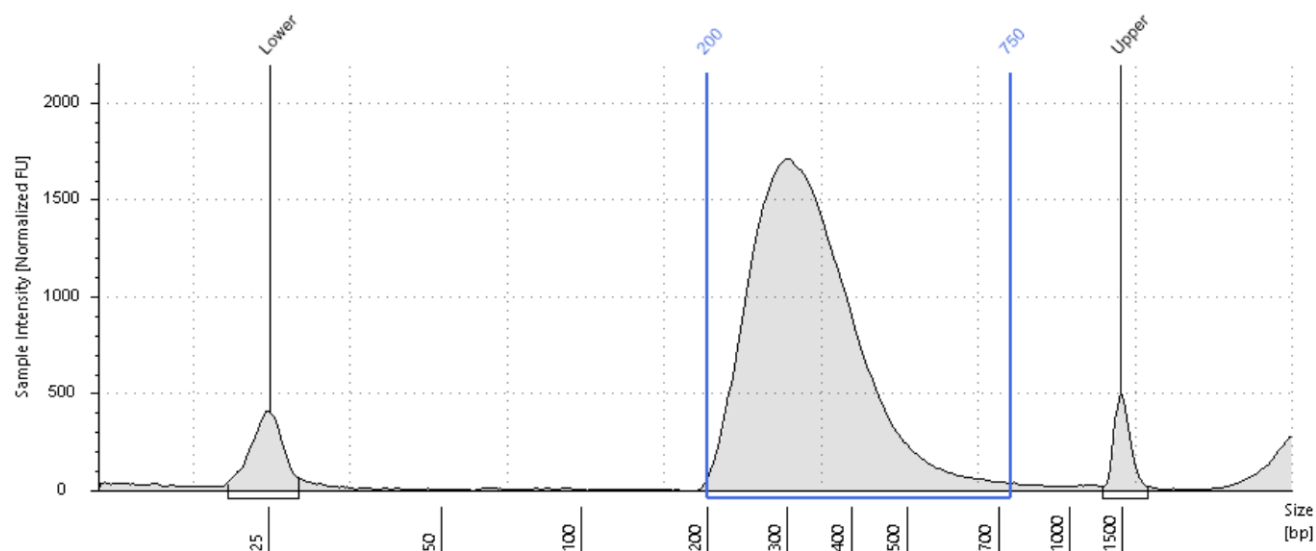

Region Table

| From [bp] | To [bp] | Average Size [bp] | Conc. [pg/ul] | Region Molarity [pmol/l] | % of Total | Region Comment | Color |
|-----------|---------|-------------------|---------------|--------------------------|------------|----------------|-------|
| 200       | 750     | 340               | 5560          | 26600                    | 92.48      |                |       |
