# Supplementary material for: LEO1 Is Required for Efficient Entry into Quiescence, Control of H3K9 Methylation and Gene Expression in Human Fibroblasts
Source: Biomolecules. 2023 Nov 17;13(11):1662. doi: 10.3390/biom13111662 (PMC10668985; doi:10.3390/biom13111662)
Supplement: Supplementary file 1 [file biomolecules-13-01662-s001.zip]

Archive with 5 entries (5 files):
- Supplementary Figure S1.pdf
- Supplementary Figure S2.pdf
- Supplementary Figure S3.pdf
- Supplementary Table S5.xlsx
- Supplementary Tables S1-S4.xlsx
