# Supplementary material for: LEO1 Is Required for Efficient Entry into Quiescence, Control of H3K9 Methylation and Gene Expression in Human Fibroblasts
Source: Biomolecules. 2023 Nov 17;13(11):1662. doi: 10.3390/biom13111662 (PMC10668985; doi:10.3390/biom13111662)
Supplement: Supplementary file 1 [file biomolecules-13-01662-s001.zip › Supplementary Table S5.xlsx]

## Sheet: Down in wt
ensembl	entrez	symbol	WT01_WT10_logFC	WT01_WT10_LR	WT01_WT10_PValue	WT01_WT10_FDR	WT01_WT10_DE
ENSG00000187583	84069	PLEKHN1	-1.46168	7.70446	0.00550846	0.0254509	-1
ENSG00000188157	375790	AGRN	-1.7426	14.8042	0.000119272	0.00181986	-1
ENSG00000224051	80772	CPTP	-1.32601	7.84641	0.00509218	0.0243287	-1
ENSG00000175756	54998	AURKAIP1	-1.13599	6.06891	0.0137582	0.0437055	-1
ENSG00000197785	55210	ATAD3A	-1.44539	9.37496	0.0021997	0.014521	-1
ENSG00000215014	NA		-2.16853	10.7018	0.00107033	0.0089846	-1
ENSG00000008130	65220	NADK	-1.12857	6.02796	0.014081	0.0441712	-1
ENSG00000078369	2782	GNB1	-1.42897	10.1149	0.00147073	0.0111124	-1
ENSG00000272449	NA		-2.52588	10.5156	0.00118371	0.00962319	-1
ENSG00000157870	127281	PRXL2B	-1.19141	6.48114	0.0109025	0.0382676	-1
ENSG00000162591	1953	MEGF6	-2.55424	29.3463	6.05315e-08	3.63443e-06	-1
ENSG00000116198	9731	CEP104	-1.42706	9.3455	0.00223534	0.0146395	-1
ENSG00000169598	1677	DFFB	-1.2211	5.6885	0.0170764	0.0493079	-1
ENSG00000069424	8514	KCNAB2	-1.1541	6.01748	0.0141648	0.0443258	-1
ENSG00000116237	23463	ICMT	-1.3962	9.43329	0.00213082	0.0142517	-1
ENSG00000097021	11332	ACOT7	-1.80512	14.7025	0.00012588	0.00188832	-1
ENSG00000049245	9341	VAMP3	-1.30521	8.26688	0.00403749	0.0212991	-1
ENSG00000116288	11315	PARK7	-1.08239	5.70475	0.0169191	0.0490787	-1
ENSG00000074800	2023	ENO1	-2.14327	22.053	2.65218e-06	8.89585e-05	-1
ENSG00000180758	80045	GPR157	-1.72193	11.566	0.000671686	0.00652965	-1
ENSG00000171612	84275	SLC25A33	-1.28156	6.17693	0.0129427	0.0422322	-1
ENSG00000171608	5293	PIK3CD	-1.67968	12.6793	0.000369718	0.00430498	-1
ENSG00000231789	101929074	PIK3CD-AS2	-1.90441	11.8423	0.000578999	0.0059489	-1
ENSG00000171603	22883	CLSTN1	-1.14439	6.52233	0.0106528	0.0377604	-1
ENSG00000178585	56998	CTNNBIP1	-1.36051	8.20855	0.00416935	0.0217215	-1
ENSG00000173614	64802	NMNAT1	-1.22074	6.20658	0.0127277	0.0418544	-1
ENSG00000054523	23095	KIF1B	-1.63208	12.496	0.000407833	0.00461224	-1
ENSG00000142657	5226	PGD	-1.27444	7.8147	0.00518228	0.0245831	-1
ENSG00000130940	54897	CASZ1	-3.71464	31.5626	1.93109e-08	1.34416e-06	-1
ENSG00000198793	2475	MTOR	-1.56675	11.5386	0.000681653	0.00658262	-1
ENSG00000116661	26232	FBXO2	-1.58792	8.56716	0.00342281	0.0191819	-1
ENSG00000116670	10459	MAD2L2	-1.21167	6.62283	0.010068	0.0365771	-1
ENSG00000215910	284498	C1orf167	-2.96202	15.7955	7.05716e-05	0.00120539	-1
ENSG00000177000	4524	MTHFR	-1.35238	8.26306	0.00404598	0.0213367	-1
ENSG00000083444	5351	PLOD1	-1.14539	6.59029	0.0102536	0.0369784	-1
ENSG00000116688	9927	MFN2	-1.20122	6.97932	0.0082457	0.0326487	-1
ENSG00000048707	55187	VPS13D	-1.19813	6.87138	0.00875869	0.033729	-1
ENSG00000132906	842	CASP9	-1.435	8.32318	0.00391424	0.0208446	-1
ENSG00000116138	23341	DNAJC16	-1.23769	6.84863	0.00887092	0.0339369	-1
ENSG00000116771	79814	AGMAT	-1.50604	7.9288	0.00486541	0.0236812	-1
ENSG00000162458	54751	FBLIM1	-1.08424	5.79917	0.0160338	0.0476832	-1
ENSG00000184908	1188	CLCNKB	-2.63447	16.3903	5.15486e-05	0.000949545	-1
ENSG00000185519	348487	FAM131C	-2.39038	12.7706	0.000352102	0.0041428	-1
ENSG00000142627	1969	EPHA2	-1.56496	11.5869	0.000664189	0.00648161	-1
ENSG00000142632	128272	ARHGEF19	-1.43885	8.19608	0.0041981	0.0218027	-1
ENSG00000132881	79363	CPLANE2	-1.48673	7.81689	0.00517601	0.024577	-1
ENSG00000037637	54455	FBXO42	-1.2493	7.20895	0.00725407	0.0300933	-1
ENSG00000157191	55707	NECAP2	-1.27757	7.76691	0.0053212	0.024913	-1
ENSG00000159363	23400	ATP13A2	-1.42005	9.05383	0.00262145	0.0161369	-1
ENSG00000117118	6390	SDHB	-1.1176	5.9294	0.0148903	0.0456181	-1
ENSG00000204362	400743	LINC02783	-4.30167	26.2031	3.07334e-07	1.46063e-05	-1
ENSG00000142623	29943	PADI1	-2.6914	19.2583	1.14173e-05	0.000292043	-1
ENSG00000159423	8659	ALDH4A1	-2.49256	23.4366	1.291e-06	4.82392e-05	-1
ENSG00000169991	126917	IFFO2	-1.13391	5.96176	0.0146195	0.0451027	-1
ENSG00000127481	23352	UBR4	-1.11755	6.212	0.0126887	0.0417586	-1
ENSG00000162542	255104	TMCO4	-1.12749	5.90574	0.0150916	0.0460372	-1
ENSG00000169914	23252	OTUD3	-1.35761	7.72614	0.00544271	0.0252262	-1
ENSG00000162545	55450	CAMK2N1	-1.63344	12.926	0.000324055	0.00390983	-1
ENSG00000183114	163933	FAM43B	-1.45209	5.69311	0.0170317	0.049251	-1
ENSG00000158825	978	CDA	-5.23925	36.8564	1.27157e-09	1.19779e-07	-1
ENSG00000158828	65018	PINK1	-1.87132	16.3363	5.30384e-05	0.000970172	-1
ENSG00000117242	100861548	PINK1-AS	-1.18358	5.9738	0.01452	0.0449191	-1
ENSG00000244038	1650	DDOST	-1.07054	5.72432	0.0167315	0.0487441	-1
ENSG00000117245	57576	KIF17	-3.41769	34.2715	4.79343e-09	3.94793e-07	-1
ENSG00000189410	400745	SH2D5	-3.02939	28.3522	1.01133e-07	5.76421e-06	-1
ENSG00000075151	8672	EIF4G3	-1.33937	8.64509	0.00327944	0.0186849	-1
ENSG00000117298	1889	ECE1	-1.21889	7.36993	0.00663235	0.0284652	-1
ENSG00000142794	84224	NBPF3	-1.39288	9.14761	0.00249044	0.0156458	-1
ENSG00000090686	84196	USP48	-1.21197	7.00829	0.00811333	0.0322426	-1
ENSG00000187942	401944	LDLRAD2	-1.48031	7.65886	0.00564941	0.0258175	-1
ENSG00000142798	3339	HSPG2	-2.45597	28.1087	1.14687e-07	6.42044e-06	-1
ENSG00000070831	998	CDC42	-1.24584	7.6662	0.00562649	0.0257634	-1
ENSG00000007968	1870	E2F2	-2.4241	20.6467	5.5232e-06	0.000163935	-1
ENSG00000117318	3399	ID3	-2.96751	37.593	8.71589e-10	8.51613e-08	-1
ENSG00000117308	2582	GALE	-2.3405	21.4867	3.56291e-06	0.000115089	-1
ENSG00000117305	3155	HMGCL	-1.27912	7.15886	0.00745946	0.0306703	-1
ENSG00000001460	90529	STPG1	-1.33042	7.22167	0.00720285	0.0299671	-1
ENSG00000001461	57185	NIPAL3	-1.80435	15.2256	9.54005e-05	0.0015267	-1
ENSG00000117602	11123	RCAN3	-1.78978	14.1138	0.000172075	0.00241043	-1
ENSG00000169504	25932	CLIC4	-1.64502	13.4051	0.000250941	0.0032327	-1
ENSG00000183726	23585	TMEM50A	-1.18858	6.86178	0.00880587	0.0338145	-1
ENSG00000204178	55219	MACO1	-1.16195	6.27651	0.0122349	0.0410203	-1
ENSG00000157978	26119	LDLRAP1	-1.67322	12.6823	0.000369128	0.0043013	-1
ENSG00000162430	57190	SELENON	-1.22741	7.40939	0.00648844	0.0280642	-1
ENSG00000228172	NA		-2.08102	11.3309	0.000762293	0.00711247	-1
ENSG00000127423	79000	AUNIP	-1.89062	12.0032	0.0005311	0.00559969	-1
ENSG00000182749	164091	PAQR7	-1.6119	11.5785	0.000667204	0.006507	-1
ENSG00000117632	3925	STMN1	-1.68968	13.607	0.000225338	0.00299293	-1
ENSG00000158006	5051	PAFAH2	-1.26775	6.40882	0.0113555	0.0392084	-1
ENSG00000158008	2134	EXTL1	-4.0832	48.0172	4.22491e-12	8.00749e-10	-1
ENSG00000130695	64793	CEP85	-1.79106	12.8737	0.00033324	0.00397739	-1
ENSG00000142669	83442	SH3BGRL3	-1.11893	6.24327	0.0124666	0.0414376	-1
ENSG00000117682	79947	DHDDS	-1.50278	10.2769	0.00134706	0.0104131	-1
ENSG00000198830	3151	HMGN2	-1.2465	7.61959	0.00577376	0.0261674	-1
ENSG00000117676	6195	RPS6KA1	-2.09752	16.1528	5.84336e-05	0.00104102	-1
ENSG00000260063	101928728	LOC101928728	-1.67776	7.77247	0.00530483	0.0248734	-1
ENSG00000158246	115572	TENT5B	-3.25961	32.0134	1.5311e-08	1.08985e-06	-1
ENSG00000142733	9064	MAP3K6	-1.43135	9.11768	0.00253151	0.0158595	-1
ENSG00000158195	10163	WASF2	-1.0664	5.64385	0.0175167	0.0499918	-1
ENSG00000130770	93974	ATP5IF1	-1.27676	7.6538	0.0056653	0.0258634	-1
ENSG00000180198	1104	RCC1	-1.35143	8.50134	0.00354885	0.0195678	-1
ENSG00000180098	54952	TRNAU1AP	-1.37304	7.81747	0.00517434	0.0245766	-1
ENSG00000159023	2035	EPB41	-1.40191	8.57656	0.00340518	0.0191311	-1
ENSG00000168528	347735	SERINC2	-2.74761	32.69	1.08092e-08	8.07419e-07	-1
ENSG00000142910	64129	TINAGL1	-5.63186	62.3134	2.92921e-15	1.18152e-12	-1
ENSG00000162517	553115	PEF1	-1.40032	9.21576	0.0023994	0.0153124	-1
ENSG00000121753	576	ADGRB2	-1.41996	9.39025	0.00218142	0.0144293	-1
ENSG00000134668	90853	SPOCD1	-1.34811	8.46686	0.00361675	0.0198379	-1
ENSG00000184007	8073	PTP4A2	-1.19628	7.10846	0.00767208	0.0311977	-1
ENSG00000025800	23633	KPNA6	-1.25129	7.53554	0.00604936	0.0268897	-1
ENSG00000084652	200081	TXLNA	-1.3645	8.93042	0.0028046	0.0168517	-1
ENSG00000160050	79140	CCDC28B	-1.24757	5.88777	0.0152464	0.0462834	-1
ENSG00000160051	55721	IQCC	-1.2328	5.64593	0.0174959	0.0499417	-1
ENSG00000084623	8668	EIF3I	-1.1182	6.1242	0.0133343	0.0430025	-1
ENSG00000183615	84734	FAM167B	-2.79843	23.8363	1.04883e-06	4.06383e-05	-1
ENSG00000176261	339487	ZBTB8OS	-1.18806	5.99241	0.0143676	0.0446938	-1
ENSG00000116497	64766	S100PBP	-1.25143	7.16739	0.00742406	0.0305665	-1
ENSG00000004455	204	AK2	-1.17246	6.64027	0.00996989	0.0363536	-1
ENSG00000163866	113444	SMIM12	-1.16373	6.11678	0.0133905	0.0430504	-1
ENSG00000197056	79830	ZMYM1	-1.21165	6.16573	0.0130248	0.0423246	-1
ENSG00000146463	9202	ZMYM4	-1.10693	5.93351	0.0148556	0.0455633	-1
ENSG00000142687	79932	KIAA0319L	-1.33324	8.19699	0.004196	0.021799	-1
ENSG00000126067	5690	PSMB2	-1.15297	6.429	0.0112272	0.038978	-1
ENSG00000092853	63967	CLSPN	-2.17176	19.0249	1.29026e-05	0.000321666	-1
ENSG00000092847	26523	AGO1	-1.15316	6.28334	0.0121878	0.0409092	-1
ENSG00000116863	54936	ADPRS	-1.23352	6.89535	0.00864201	0.0334599	-1
ENSG00000054118	9967	THRAP3	-1.14545	6.43054	0.0112174	0.0389626	-1
ENSG00000214193	79729	SH3D21	-1.7166	12.0197	0.000526412	0.00556144	-1
ENSG00000286379	NA		-1.52169	6.25063	0.0124149	0.0413331	-1
ENSG00000116885	127700	OSCP1	-1.2321	5.66473	0.0173094	0.0497149	-1
ENSG00000116898	64960	MRPS15	-1.3054	7.9042	0.00493202	0.0238432	-1
ENSG00000163874	80149	ZC3H12A	-1.6381	11.1206	0.000853747	0.00767885	-1
ENSG00000134690	55143	CDCA8	-2.01237	17.2644	3.25227e-05	0.000667905	-1
ENSG00000197982	127687	C1orf122	-1.49821	10.0911	0.00148987	0.01123	-1
ENSG00000116954	64121	RRAGC	-1.45869	9.33455	0.00224873	0.0147027	-1
ENSG00000158315	54933	RHBDL2	-2.37832	12.2979	0.000453461	0.00498839	-1
ENSG00000127603	23499	MACF1	-1.40208	9.71349	0.00182921	0.0129501	-1
ENSG00000168389	84879	MFSD2A	-3.04605	27.5211	1.55392e-07	8.25611e-06	-1
ENSG00000131236	10487	CAP1	-1.72972	14.6032	0.000132689	0.00196548	-1
ENSG00000131238	5538	PPT1	-1.08329	5.69942	0.0169706	0.0491565	-1
ENSG00000117000	6018	RLF	-1.10692	5.76123	0.0163836	0.0482281	-1
ENSG00000084073	10269	ZMPSTE24	-1.1981	6.88809	0.00867719	0.0335469	-1
ENSG00000084070	64744	SMAP2	-1.33949	8.22223	0.00413803	0.0216467	-1
ENSG00000117016	9783	RIMS3	-1.97042	11.7843	0.000597339	0.00606633	-1
ENSG00000171793	1503	CTPS1	-1.39188	9.14938	0.00248802	0.0156369	-1
ENSG00000236876	NA	TMSB4XP1	-1.98703	8.73937	0.00311413	0.0180569	-1
ENSG00000117394	6513	SLC2A1	-1.39909	9.55181	0.00199753	0.0137459	-1
ENSG00000117395	10969	EBNA1BP2	-1.32906	8.35617	0.0038438	0.0206201	-1
ENSG00000243710	149465	CFAP57	-1.46272	5.91104	0.0150463	0.0459867	-1
ENSG00000117399	991	CDC20	-2.10084	19.6831	9.14069e-06	0.000243716	-1
ENSG00000066322	64834	ELOVL1	-1.56141	11.4371	0.000719907	0.00685696	-1
ENSG00000159479	112950	MED8	-1.15581	6.25072	0.0124143	0.0413331	-1
ENSG00000178922	81888	HYI	-1.25726	6.44144	0.0111488	0.0388013	-1
ENSG00000142949	5792	PTPRF	-2.27426	23.4057	1.31189e-06	4.8788e-05	-1
ENSG00000117408	9670	IPO13	-1.39734	8.52926	0.00349483	0.0193926	-1
ENSG00000117410	533	ATP6V0B	-1.10597	5.74657	0.0165209	0.0484328	-1
ENSG00000117411	8704	B4GALT2	-1.25013	7.53429	0.00605357	0.0268932	-1
ENSG00000159214	149473	CCDC24	-1.69326	10.1499	0.00144306	0.0109984	-1
ENSG00000230615	107984948	LOC107984948	-1.53381	8.2115	0.00416256	0.0217113	-1
ENSG00000171872	128209	KLF17	-1.65813	7.28729	0.00694443	0.0292328	-1
ENSG00000126106	79639	TMEM53	-1.61677	9.70924	0.00183344	0.0129626	-1
ENSG00000142945	11004	KIF2C	-1.73493	13.55	0.00023229	0.00305389	-1
ENSG00000142959	266675	BEST4	-2.38054	11.1081	0.00085952	0.00771313	-1
ENSG00000280670	126661	CCDC163	-1.33285	5.76535	0.0163452	0.0481781	-1
ENSG00000132763	25974	MMACHC	-1.28321	6.46937	0.010975	0.0384515	-1
ENSG00000117450	5052	PRDX1	-1.40867	9.75907	0.0017844	0.0127709	-1
ENSG00000117448	10327	AKR1A1	-1.12632	6.03019	0.0140633	0.0441487	-1
ENSG00000085998	55624	POMGNT1	-1.24307	7.33417	0.00676558	0.0287733	-1
ENSG00000085999	8438	RAD54L	-1.79711	11.8284	0.000583348	0.00597828	-1
ENSG00000159658	9813	EFCAB14	-1.19425	6.93631	0.0084463	0.0330109	-1
ENSG00000123473	6491	STIL	-2.19329	19.5953	9.57048e-06	0.000253031	-1
ENSG00000162368	51727	CMPK1	-1.24819	7.59477	0.0058538	0.0264012	-1
ENSG00000225762	NA	LINC01389	-2.25216	13.4111	0.000250138	0.00322992	-1
ENSG00000085831	22996	TTC39A	-3.84751	25.4547	4.529e-07	2.04729e-05	-1
ENSG00000078618	4898	NRDC	-1.24068	7.4943	0.00618945	0.0272964	-1
ENSG00000169213	5865	RAB3B	-2.89092	37.0427	1.15571e-09	1.10857e-07	-1
ENSG00000117862	51060	TXNDC12	-1.27479	6.72437	0.00951042	0.0353684	-1
ENSG00000154222	200014	CC2D1B	-1.6647	12.2084	0.00047575	0.0051614	-1
ENSG00000085840	4998	ORC1	-2.1315	16.703	4.37121e-05	0.000841658	-1
ENSG00000116157	2882	GPX7	-1.28741	6.30239	0.0120576	0.0406898	-1
ENSG00000162378	79699	ZYG11B	-1.43334	9.7425	0.00180056	0.0128165	-1
ENSG00000203995	440590	ZYG11A	-1.85702	11.7286	0.000615462	0.00619508	-1
ENSG00000162383	6512	SLC1A7	-3.53138	25.381	4.70521e-07	2.08501e-05	-1
ENSG00000157184	1376	CPT2	-1.45872	8.82944	0.00296409	0.0174311	-1
ENSG00000157193	7804	LRP8	-2.3893	21.3426	3.84098e-06	0.000122147	-1
ENSG00000058804	55706	NDC1	-1.68249	12.7619	0.000353744	0.004159	-1
ENSG00000058799	54432	YIPF1	-1.31467	7.45472	0.00632702	0.0276865	-1
ENSG00000116212	115353	LRRC42	-1.65578	12.5054	0.000405779	0.00459892	-1
ENSG00000116205	127428	TCEANC2	-1.20958	5.94939	0.0147224	0.0453062	-1
ENSG00000116221	51253	MRPL37	-1.4955	10.4993	0.00119419	0.00967841	-1
ENSG00000116133	1718	DHCR24	-1.86121	16.3107	5.37589e-05	0.000978799	-1
ENSG00000162409	5563	PRKAA2	-1.82473	12.4827	0.000410739	0.00463178	-1
ENSG00000172456	55277	FGGY	-1.42828	7.67966	0.00558468	0.0256654	-1
ENSG00000132849	10207	PATJ	-1.38307	8.2146	0.00415547	0.0216824	-1
ENSG00000162607	7398	USP1	-1.16821	6.51451	0.0106998	0.0378255	-1
ENSG00000116641	85440	DOCK7	-1.42761	9.81263	0.00173317	0.0125296	-1
ENSG00000079739	5236	PGM1	-2.31529	23.7759	1.0823e-06	4.16275e-05	-1
ENSG00000162433	205	AK4	-2.21021	20.4402	6.15245e-06	0.00017726	-1
ENSG00000116675	9829	DNAJC6	-2.18103	20.9694	4.66675e-06	0.000142549	-1
ENSG00000213625	54741	LEPROT	-1.17137	6.7212	0.00952734	0.0354045	-1
ENSG00000116678	3953	LEPR	-1.4656	9.22032	0.00239344	0.0152805	-1
ENSG00000116704	23169	SLC35D1	-1.42079	9.2799	0.00231682	0.0149675	-1
ENSG00000142864	26135	SERBP1	-1.11556	6.20748	0.0127212	0.0418479	-1
ENSG00000116717	1647	GADD45A	-1.84903	15.5795	7.91075e-05	0.00131687	-1
ENSG00000172380	55970	GNG12	-1.31062	8.55459	0.00344652	0.0192543	-1
ENSG00000232284	100289178	GNG12-AS1	-1.53677	5.94231	0.0147816	0.0454247	-1
ENSG00000024526	55635	DEPDC1	-2.17548	20.0998	7.35046e-06	0.000204707	-1
ENSG00000066557	55631	LRRC40	-1.29814	7.53098	0.00606469	0.0269198	-1
ENSG00000116761	1491	CTH	-1.36107	6.40771	0.0113626	0.0392241	-1
ENSG00000172260	257194	NEGR1	-2.24593	20.8351	5.0057e-06	0.000150852	-1
ENSG00000116791	1429	CRYZ	-1.14615	5.97305	0.0145261	0.0449205	-1
ENSG00000117054	34	ACADM	-1.69669	13.0003	0.000311435	0.00380371	-1
ENSG00000226415	NA	TPI1P1	-1.80966	10.6851	0.00108002	0.00904195	-1
ENSG00000117069	81849	ST6GALNAC5	-2.39201	22.0843	2.60939e-06	8.80865e-05	-1
ENSG00000142892	10026	PIGK	-1.10889	5.83716	0.0156911	0.0470524	-1
ENSG00000154027	26289	AK5	-1.46622	8.50052	0.00355046	0.0195698	-1
ENSG00000180488	374986	MIGA1	-1.59383	11.1937	0.000820757	0.00745404	-1
ENSG00000219201	NA		-1.59897	7.60859	0.0058091	0.0262749	-1
ENSG00000235927	374987	NEXN-AS1	-1.54183	6.94338	0.00841302	0.0329627	-1
ENSG00000162614	91624	NEXN	-1.60884	12.2243	0.000471721	0.00514251	-1
ENSG00000162616	11080	DNAJB4	-2.18374	21.2904	3.94697e-06	0.000124929	-1
ENSG00000137941	79739	TTLL7	-1.81647	13.9113	0.000191644	0.00262837	-1
ENSG00000142875	5567	PRKACB	-1.33625	8.52647	0.00350018	0.0193955	-1
ENSG00000153904	23576	DDAH1	-1.5075	10.9691	0.000926412	0.00812925	-1
ENSG00000282057	NA		-1.64528	9.8231	0.00172334	0.0124758	-1
ENSG00000171502	255631	COL24A1	-1.94101	10.7002	0.00107122	0.0089846	-1
ENSG00000137975	9635	CLCA2	-1.98066	8.56714	0.00342285	0.0191819	-1
ENSG00000097033	51100	SH3GLB1	-1.12554	6.22296	0.0126104	0.0416577	-1
ENSG00000213516	494115	RBMXL1	-1.56793	10.7645	0.00103468	0.00876969	-1
ENSG00000234518	NA	PTGES3P1	-1.43714	6.12876	0.0133	0.0429438	-1
ENSG00000171492	55144	LRRC8D	-1.30457	8.10606	0.00441174	0.0224236	-1
ENSG00000097046	8317	CDC7	-2.13665	16.5895	4.64066e-05	0.000876243	-1
ENSG00000067208	7813	EVI5	-1.30041	7.93874	0.00483876	0.0236279	-1
ENSG00000154511	388650	DIPK1A	-1.27009	7.60301	0.00582711	0.0263036	-1
ENSG00000122483	343099	CCDC18	-1.32672	6.72791	0.00949158	0.0353067	-1
ENSG00000137936	8412	BCAR3	-1.39688	9.086	0.00257573	0.0160027	-1
ENSG00000023909	2730	GCLM	-2.40977	24.7524	6.51872e-07	2.74922e-05	-1
ENSG00000137962	9411	ARHGAP29	-1.50213	10.8353	0.00099583	0.00852771	-1
ENSG00000117528	5825	ABCD3	-1.40406	9.2026	0.00241672	0.0153917	-1
ENSG00000117525	2152	F3	-1.49619	10.8238	0.00100204	0.00856228	-1
ENSG00000143036	126969	SLC44A3	-1.91109	10.9358	0.000943235	0.00821596	-1
ENSG00000152078	148534	TLCD4	-2.07676	15.523	8.15093e-05	0.00134546	-1
ENSG00000225206	400765	MIR137HG	-2.7861	14.0578	0.00017728	0.00246796	-1
ENSG00000162627	51375	SNX7	-1.47065	10.0213	0.00154736	0.0115363	-1
ENSG00000117600	9890	PLPPR4	-3.24655	44.0935	3.13066e-11	4.64607e-09	-1
ENSG00000162688	178	AGL	-1.33698	8.0307	0.0045991	0.0229678	-1
ENSG00000117620	23443	SLC35A3	-1.54774	10.5854	0.00113981	0.00934848	-1
ENSG00000156875	64645	MFSD14A	-1.60243	9.70371	0.00183897	0.01299	-1
ENSG00000156876	163786	SASS6	-1.95463	14.5037	0.000139884	0.00204472	-1
ENSG00000137992	1629	DBT	-1.16527	6.2362	0.0125165	0.0415657	-1
ENSG00000137996	8634	RTCA	-1.44802	9.37028	0.00220532	0.014552	-1
ENSG00000079335	8556	CDC14A	-1.6948	10.4836	0.00120439	0.00973596	-1
ENSG00000162695	148867	SLC30A7	-1.34952	8.55049	0.00345428	0.0192761	-1
ENSG00000170989	1901	S1PR1	-2.18944	17.7451	2.52565e-05	0.000549529	-1
ENSG00000060718	1301	COL11A1	-3.9163	62.4576	2.72237e-15	1.12699e-12	-1
ENSG00000085491	29957	SLC25A24	-1.1222	6.02433	0.01411	0.0442161	-1
ENSG00000085433	22911	WDR47	-1.67469	12.5448	0.000397319	0.00454232	-1
ENSG00000197780	6884	TAF13	-1.34362	8.34656	0.00386418	0.020677	-1
ENSG00000116299	57535	ELAPOR1	-1.5765	8.58623	0.00338715	0.0191048	-1
ENSG00000031698	6301	SARS1	-1.1853	6.89348	0.00865108	0.0334785	-1
ENSG00000143126	1952	CELSR2	-2.59502	25.4383	4.56764e-07	2.05486e-05	-1
ENSG00000134222	84722	PSRC1	-2.1688	18.4684	1.72742e-05	0.000406189	-1
ENSG00000134243	6272	SORT1	-3.1357	41.6979	1.06523e-10	1.36237e-08	-1
ENSG00000143106	5686	PSMA5	-2.13412	21.1479	4.25175e-06	0.000132707	-1
ENSG00000143028	284612	SYPL2	-2.83563	36.1521	1.82502e-09	1.66915e-07	-1
ENSG00000162650	127002	ATXN7L2	-1.9039	16.0361	6.21454e-05	0.00109352	-1
ENSG00000174151	284613	CYB561D1	-1.22564	6.73413	0.00945853	0.0352338	-1
ENSG00000065135	2773	GNAI3	-1.18918	6.86741	0.0087782	0.0337628	-1
ENSG00000168710	10768	AHCYL1	-1.22164	7.30217	0.00688714	0.0290918	-1
ENSG00000258673	104355139	LINC01397	-1.26234	6.02769	0.0140831	0.0441712	-1
ENSG00000186150	164153	UBL4B	-1.33858	7.01221	0.00809558	0.0322083	-1
ENSG00000197106	388662	SLC6A17	-2.302	18.446	1.74786e-05	0.000408553	-1
ENSG00000224699	101410535	LAMTOR5-AS1	-1.74559	6.94509	0.00840495	0.0329475	-1
ENSG00000168679	9122	SLC16A4	-1.54061	9.42021	0.00214606	0.0143039	-1
ENSG00000162777	79961	DENND2D	-2.56212	14.5619	0.000135632	0.00199042	-1
ENSG00000116455	79084	WDR77	-1.19634	6.15468	0.0131065	0.0425027	-1
ENSG00000116459	515	ATP5PB	-1.13804	6.27666	0.0122338	0.0410203	-1
ENSG00000116473	5906	RAP1A	-1.17741	6.65946	0.00986308	0.0361248	-1
ENSG00000116489	829	CAPZA1	-1.3815	9.32085	0.00226561	0.0147765	-1
ENSG00000155363	4343	MOV10	-1.37507	8.88978	0.00286771	0.0170814	-1
ENSG00000155366	389	RHOC	-1.54303	11.3956	0.00073617	0.00695537	-1
ENSG00000155380	6566	SLC16A1	-1.20871	7.08106	0.00779031	0.0314429	-1
ENSG00000226419	100506392	SLC16A1-AS1	-1.35902	7.09864	0.00771425	0.0312765	-1
ENSG00000134242	26191	PTPN22	-4.08382	29.0791	6.94821e-08	4.10911e-06	-1
ENSG00000118655	64858	DCLRE1B	-1.27677	6.86468	0.0087916	0.0337845	-1
ENSG00000163349	204851	HIPK1	-1.1411	6.2909	0.0121359	0.0408103	-1
ENSG00000213281	4893	NRAS	-1.24547	7.4256	0.00643024	0.0279509	-1
ENSG00000009307	7812	CSDE1	-1.11123	6.23222	0.0125446	0.0415783	-1
ENSG00000228035	112840934	NGF-AS1	-2.9912	8.89654	0.00285711	0.0170376	-1
ENSG00000173218	81839	VANGL1	-1.35998	8.56653	0.00342399	0.0191819	-1
ENSG00000163399	476	ATP1A1	-1.39632	9.6504	0.00189311	0.0132647	-1
ENSG00000198162	10905	MAN1A2	-1.08782	5.7684	0.0163169	0.0481487	-1
ENSG00000134250	4853	NOTCH2	-1.09873	6.04507	0.0139452	0.0439493	-1
ENSG00000265808	9554	SEC22B	-1.27194	7.79318	0.00524438	0.0247448	-1
ENSG00000223612	NA		-1.37299	6.62749	0.0100416	0.0365153	-1
ENSG00000265491	27246	RNF115	-1.18694	6.66141	0.0098523	0.036109	-1
ENSG00000186364	200035	NUDT17	-1.26725	5.77895	0.0162193	0.047999	-1
ENSG00000131788	10401	PIAS3	-1.37761	9.02644	0.00266103	0.0163056	-1
ENSG00000131779	8799	PEX11B	-1.2873	7.18731	0.00734208	0.0303464	-1
ENSG00000271601	128077	LIX1L	-1.14667	6.26246	0.0123323	0.0412251	-1
ENSG00000272031	284615	ANKRD34A	-2.87204	28.8532	7.80761e-08	4.54894e-06	-1
ENSG00000265972	10628	TXNIP	-1.38438	9.44257	0.00212006	0.0142359	-1
ENSG00000277406	NA	SEC22B4P	-1.90352	8.7928	0.00302422	0.0176766	-1
ENSG00000131778	9557	CHD1L	-1.56455	8.29728	0.00397046	0.0210726	-1
ENSG00000265107	2702	GJA5	-5.24426	80.8599	2.42305e-19	2.54113e-16	-1
ENSG00000178104	9659	PDE4DIP	-1.15632	6.35425	0.0117101	0.0399761	-1
ENSG00000220323	337874	H2BC19P	-1.51959	7.84865	0.00508587	0.0243179	-1
ENSG00000159164	9900	SV2A	-1.35945	8.52574	0.00350157	0.0193955	-1
ENSG00000285184	NA		-1.43616	6.43494	0.0111897	0.038892	-1
ENSG00000136631	11311	VPS45	-1.23983	6.9662	0.00830636	0.0327816	-1
ENSG00000143401	81611	ANP32E	-1.44563	9.8609	0.00168829	0.0123184	-1
ENSG00000159208	148523	CIART	-1.43569	7.57534	0.00591721	0.0265498	-1
ENSG00000143382	54507	ADAMTSL4	-1.79482	14.9292	0.000111622	0.00172657	-1
ENSG00000143457	55204	GOLPH3L	-1.11959	5.76748	0.0163254	0.0481605	-1
ENSG00000143412	8416	ANXA9	-5.39821	38.361	5.87958e-10	6.12528e-08	-1
ENSG00000143363	58497	PRUNE1	-1.23567	6.76467	0.00929802	0.0349086	-1
ENSG00000143390	5993	RFX5	-1.29945	7.58318	0.00589153	0.0264875	-1
ENSG00000196154	6275	S100A4	-1.51698	11.2849	0.00078139	0.00724052	-1
ENSG00000188643	140576	S100A16	-1.36495	8.95716	0.00276384	0.0167043	-1
ENSG00000143553	23557	SNAPIN	-1.36329	8.08351	0.00446699	0.0225708	-1
ENSG00000143621	3608	ILF2	-1.08362	5.72033	0.0167696	0.0488162	-1
ENSG00000143570	27173	SLC39A1	-1.51089	7.25626	0.00706541	0.029568	-1
ENSG00000282386	NA		-1.8281	8.3327	0.00389378	0.0207638	-1
ENSG00000143549	7170	TPM3	-1.59417	12.3749	0.000435136	0.0048273	-1
ENSG00000143612	25912	C1orf43	-1.15322	6.45093	0.0110894	0.0386974	-1
ENSG00000143575	10456	HAX1	-1.38639	8.9969	0.00270438	0.0164448	-1
ENSG00000160712	3570	IL6R	-1.7518	11.112	0.000857721	0.00770577	-1
ENSG00000160714	55585	UBE2Q1	-1.18936	6.80639	0.00908323	0.0344061	-1
ENSG00000163344	10654	PMVK	-1.28926	6.96428	0.00831531	0.0327851	-1
ENSG00000160691	6464	SHC1	-1.80366	15.6538	7.60592e-05	0.00127557	-1
ENSG00000173207	1163	CKS1B	-1.16539	5.79487	0.016073	0.0477471	-1
ENSG00000143590	1944	EFNA3	-1.9873	12.6227	0.00038109	0.0043951	-1
ENSG00000169242	1942	EFNA1	-2.3496	9.64229	0.00190148	0.0133002	-1
ENSG00000169241	55974	SLC50A1	-1.44035	9.07648	0.00258917	0.0160482	-1
ENSG00000163462	80128	TRIM46	-2.27715	18.2551	1.9321e-05	0.000444354	-1
ENSG00000185499	4582	MUC1	-2.46115	25.3215	4.85279e-07	2.13835e-05	-1
ENSG00000169231	7059	THBS3	-1.40787	8.84827	0.00293366	0.0173104	-1
ENSG00000160767	10712	ENTREP3	-1.54678	10.8935	0.000965042	0.00833785	-1
ENSG00000116521	10067	SCAMP3	-1.33893	8.39042	0.00377204	0.020391	-1
ENSG00000160752	2224	FDPS	-1.21248	7.00605	0.00812348	0.0322703	-1
ENSG00000160753	23623	RUSC1	-1.3015	7.32623	0.00679556	0.0288295	-1
ENSG00000125459	55154	MSTO1	-1.37178	7.33315	0.00676943	0.0287733	-1
ENSG00000132718	23208	SYT11	-1.19325	6.86615	0.00878436	0.0337782	-1
ENSG00000143622	6016	RIT1	-1.25456	7.18536	0.00735008	0.0303715	-1
ENSG00000116586	28956	LAMTOR2	-1.2952	7.3748	0.0066144	0.0284292	-1
ENSG00000160785	9673	SLC25A44	-1.23714	7.09582	0.00772639	0.0313015	-1
ENSG00000198952	23381	SMG5	-1.17943	6.64517	0.00994247	0.0363292	-1
ENSG00000198715	112770	GLMP	-1.21249	6.76978	0.00927144	0.0348504	-1
ENSG00000163468	7203	CCT3	-1.17659	6.8137	0.0090461	0.0343398	-1
ENSG00000183856	128239	IQGAP3	-1.40549	9.09706	0.0025602	0.0159264	-1
ENSG00000163382	128240	NAXE	-1.26117	7.39522	0.00653975	0.0282241	-1
ENSG00000229953	NA		-1.70806	6.17728	0.0129401	0.0422322	-1
ENSG00000132688	10763	NES	-1.26144	7.9467	0.00481752	0.0235937	-1
ENSG00000143320	1382	CRABP2	-1.12974	6.42505	0.0112521	0.0389935	-1
ENSG00000187800	375033	PEAR1	-2.16393	21.0846	4.39452e-06	0.000136083	-1
ENSG00000160838	149499	LRRC71	-1.90119	8.12491	0.00436612	0.0222923	-1
ENSG00000158716	54935	DUSP23	-1.23292	5.82183	0.0158285	0.0473559	-1
ENSG00000158710	8407	TAGLN2	-1.1745	6.91847	0.00853101	0.0332268	-1
ENSG00000224259	100505633	LINC01133	-1.24559	6.49076	0.0108437	0.0381358	-1
ENSG00000018625	477	ATP1A2	-7.87681	74.4895	6.09609e-18	4.35898e-15	-1
ENSG00000143318	844	CASQ1	-5.90354	38.4775	5.53896e-10	5.84787e-08	-1
ENSG00000162734	8682	PEA15	-1.62069	12.8871	0.000330855	0.00396429	-1
ENSG00000122218	1314	COPA	-1.26292	7.94427	0.00482398	0.0236111	-1
ENSG00000162755	126823	KLHDC9	-1.86913	9.31117	0.00227761	0.0148348	-1
ENSG00000158864	4720	NDUFS2	-1.18568	6.70146	0.00963339	0.0355985	-1
ENSG00000158882	84134	TOMM40L	-1.24844	6.32295	0.0119185	0.0404504	-1
ENSG00000143252	6391	SDHC	-1.15634	6.30095	0.0120674	0.0407102	-1
ENSG00000132185	84824	FCRLA	-3.61325	36.9288	1.2252e-09	1.16106e-07	-1
ENSG00000162746	127943	FCRLB	-2.72373	24.1799	8.7741e-07	3.51312e-05	-1
ENSG00000118217	22926	ATF6	-1.31801	8.32949	0.00390067	0.0207864	-1
ENSG00000152332	127933	UHMK1	-1.82563	15.6995	7.42432e-05	0.00125179	-1
ENSG00000162733	4921	DDR2	-1.27103	8.0277	0.00460673	0.0229986	-1
ENSG00000143248	8490	RGS5	-1.92758	14.1004	0.000173302	0.00242331	-1
ENSG00000143228	83540	NUF2	-1.63424	11.0324	0.00089532	0.00794824	-1
ENSG00000143183	54499	TMCO1	-1.2338	7.3323	0.00677264	0.0287792	-1
ENSG00000197965	9019	MPZL1	-1.65403	13.0989	0.000295474	0.00365704	-1
ENSG00000143158	25874	MPC2	-1.24642	7.07473	0.00781785	0.0315019	-1
ENSG00000143164	55827	DCAF6	-1.26095	7.65891	0.00564925	0.0258175	-1
ENSG00000143153	481	ATP1B1	-1.88851	15.8275	6.93853e-05	0.00119159	-1
ENSG00000000460	55732	C1orf112	-1.30693	6.68589	0.0097179	0.0358098	-1
ENSG00000007933	2328	FMO3	-2.40963	18.0078	2.19998e-05	0.000495105	-1
ENSG00000010932	2326	FMO1	-4.09563	49.6996	1.79182e-12	3.86124e-10	-1
ENSG00000076258	2329	FMO4	-1.51749	10.0638	0.00151209	0.0113649	-1
ENSG00000233328	NA	PFN1P1	-2.32532	10.5444	0.00116538	0.00950857	-1
ENSG00000010165	51603	METTL13	-1.23814	6.84139	0.00890695	0.034002	-1
ENSG00000094975	51430	SUCO	-1.24862	7.30052	0.00689346	0.0291039	-1
ENSG00000224228	NA		-4.49159	10.3392	0.00130235	0.0101826	-1
ENSG00000120337	8995	TNFSF18	-1.23184	6.90988	0.00857206	0.0333447	-1
ENSG00000117586	7292	TNFSF4	-1.36416	6.06527	0.0137866	0.0437342	-1
ENSG00000117592	9588	PRDX6	-1.54698	11.7694	0.000602129	0.0060953	-1
ENSG00000120334	91687	CENPL	-1.39017	7.98348	0.00472061	0.0233397	-1
ENSG00000117593	55157	DARS2	-1.35031	7.99878	0.00468088	0.0231994	-1
ENSG00000116161	27101	CACYBP	-1.23873	7.22249	0.00719958	0.0299671	-1
ENSG00000235750	9674	KIAA0040	-1.59195	10.2825	0.00134301	0.010392	-1
ENSG00000116183	60676	PAPPA2	-2.01097	13.5122	0.000237019	0.00310211	-1
ENSG00000224687	100302401	RASAL2-AS1	-1.90296	10.8594	0.000982974	0.00845444	-1
ENSG00000075391	9462	RASAL2	-1.9883	18.0319	2.17238e-05	0.000490298	-1
ENSG00000273062	NA	RALGPS2-AS1	-2.28877	9.75663	0.00178677	0.0127791	-1
ENSG00000116191	55103	RALGPS2	-1.23618	7.33418	0.00676554	0.0287733	-1
ENSG00000116199	9917	FAM20B	-1.53857	11.2416	0.000799841	0.00734518	-1
ENSG00000143322	27	ABL2	-1.72958	13.7527	0.000208517	0.00280837	-1
ENSG00000057252	6646	SOAT1	-1.23448	6.97709	0.00825596	0.0326646	-1
ENSG00000169905	163590	TOR1AIP2	-1.23252	7.29483	0.00691532	0.0291648	-1
ENSG00000135837	9857	CEP350	-1.34653	8.57752	0.00340339	0.0191311	-1
ENSG00000116260	5768	QSOX1	-1.22404	7.47142	0.00626861	0.0275528	-1
ENSG00000121454	89884	LHX4	-4.10144	31.2224	2.30098e-08	1.56696e-06	-1
ENSG00000143324	9213	XPR1	-1.42792	9.40458	0.00216444	0.0143605	-1
ENSG00000232586	103344928	KIAA1614-AS1	-2.15684	12.405	0.000428176	0.00476505	-1
ENSG00000135823	10228	STX6	-1.19282	6.73793	0.00943843	0.0351755	-1
ENSG00000143333	6004	RGS16	-2.34393	10.1568	0.00143772	0.0109631	-1
ENSG00000135862	3915	LAMC1	-1.89026	17.4933	2.88316e-05	0.000609588	-1
ENSG00000058085	3918	LAMC2	-1.31815	6.60536	0.0101672	0.0367749	-1
ENSG00000157064	23057	NMNAT2	-1.98999	16.4149	5.08838e-05	0.0009395	-1
ENSG00000116698	9887	SMG7	-1.17764	6.69249	0.00968201	0.0357194	-1
ENSG00000162704	10092	ARPC5	-1.74017	14.5801	0.000134326	0.0019804	-1
ENSG00000198860	116461	TSEN15	-1.41082	9.27231	0.00232645	0.0150141	-1
ENSG00000116406	80267	EDEM3	-1.25952	7.44345	0.00636676	0.0278055	-1
ENSG00000135842	116496	NIBAN1	-1.55263	11.5551	0.000675643	0.00654467	-1
ENSG00000116679	10625	IVNS1ABP	-1.28721	7.92649	0.00487163	0.0236993	-1
ENSG00000143341	83872	HMCN1	-2.89557	35.3089	2.81346e-09	2.47254e-07	-1
ENSG00000073756	5743	PTGS2	-2.56617	28.8883	7.66741e-08	4.48923e-06	-1
ENSG00000116750	51377	UCHL5	-1.20362	6.66659	0.0098237	0.0360454	-1
ENSG00000134371	79577	CDC73	-1.1668	6.49603	0.0108116	0.0380741	-1
ENSG00000162630	8707	B3GALT2	-3.14677	35.436	2.63573e-09	2.34252e-07	-1
ENSG00000232077	101929184	LINC01031	-3.86677	22.5978	1.99709e-06	7.02823e-05	-1
ENSG00000244414	3078	CFHR1	-3.32188	29.7666	4.87319e-08	3.01812e-06	-1
ENSG00000066279	259266	ASPM	-2.26272	22.9755	1.64076e-06	5.94718e-05	-1
ENSG00000177888	360023	ZBTB41	-1.48464	10.0456	0.00152713	0.0114428	-1
ENSG00000213047	163486	DENND1B	-1.84607	14.5396	0.000137246	0.00201026	-1
ENSG00000151414	140609	NEK7	-1.64905	13.2019	0.00027966	0.00349708	-1
ENSG00000203721	554279	LINC00862	-3.84847	29.4108	5.85515e-08	3.54259e-06	-1
ENSG00000282849	NA		-5.34627	42.392	7.46944e-11	9.95778e-09	-1
ENSG00000118193	9928	KIF14	-1.96139	16.3144	5.36541e-05	0.000978021	-1
ENSG00000159176	1465	CSRP1	-1.7947	15.5994	7.82779e-05	0.00130444	-1
ENSG00000198700	55705	IPO9	-1.19273	6.87323	0.00874962	0.0337106	-1
ENSG00000198892	149345	SHISA4	-1.25459	7.1531	0.00748344	0.0307288	-1
ENSG00000163431	25802	LMOD1	-1.57315	11.8044	0.000590925	0.00602062	-1
ENSG00000134375	10440	TIMM17A	-1.52775	10.8158	0.00100636	0.0085852	-1
ENSG00000176393	6051	RNPEP	-1.17148	6.61163	0.0101315	0.0366751	-1
ENSG00000077152	29089	UBE2T	-1.75805	12.3453	0.000442101	0.00488734	-1
ENSG00000077157	4660	PPP1R12B	-1.84411	13.7091	0.000213414	0.00285964	-1
ENSG00000117139	10765	KDM5B	-1.17099	6.69898	0.00964682	0.0356314	-1
ENSG00000183155	5877	RABIF	-1.2599	6.58716	0.0102717	0.0369809	-1
ENSG00000159346	51094	ADIPOR1	-1.43852	9.87044	0.00167955	0.0122734	-1
ENSG00000159348	51706	CYB5R1	-1.1316	5.87183	0.015385	0.0465324	-1
ENSG00000163444	92703	TMEM183A	-1.14154	5.97799	0.0144855	0.0448478	-1
ENSG00000143847	8497	PPFIA4	-2.61961	22.0941	2.59609e-06	8.80153e-05	-1
ENSG00000163485	134	ADORA1	-1.74435	10.3869	0.00126913	0.0100477	-1
ENSG00000188783	5549	PRELP	-1.35162	6.45996	0.0110332	0.0386039	-1
ENSG00000058668	493	ATP2B4	-2.11174	21.3721	3.78228e-06	0.000120688	-1
ENSG00000257315	100381270	ZBED6	-1.97726	13.747	0.000209158	0.00281283	-1
ENSG00000133056	5287	PIK3C2B	-1.34716	7.37143	0.00662681	0.0284569	-1
ENSG00000163531	23114	NFASC	-2.77964	25.7893	3.80794e-07	1.77227e-05	-1
ENSG00000117266	5129	CDK18	-2.17422	12.8601	0.00033566	0.00399717	-1
ENSG00000069275	64710	NUCKS1	-1.19794	7.16957	0.00741505	0.0305436	-1
ENSG00000117280	8934	RAB29	-1.69979	12.7821	0.000349951	0.00412674	-1
ENSG00000133065	254428	SLC41A1	-1.32171	8.21629	0.0041516	0.0216824	-1
ENSG00000263528	9641	IKBKE	-1.64463	10.4408	0.00123262	0.00986783	-1
ENSG00000143479	8444	DYRK3	-1.40055	8.92977	0.00280559	0.0168517	-1
ENSG00000162894	9214	FCMR	-3.51426	25.812	3.7635e-07	1.75678e-05	-1
ENSG00000123836	5208	PFKFB2	-1.6093	9.02107	0.00266885	0.0163324	-1
ENSG00000117335	4179	CD46	-1.13831	6.27405	0.0122519	0.0410511	-1
ENSG00000196878	3914	LAMB3	-1.58694	10.1851	0.00141583	0.0108171	-1
ENSG00000162757	148304	C1orf74	-1.53256	8.52854	0.00349621	0.0193926	-1
ENSG00000143473	3756	KCNH1	-3.52165	37.912	7.4008e-10	7.46295e-08	-1
ENSG00000082512	7188	TRAF5	-1.31503	7.88607	0.00498169	0.0239801	-1
ENSG00000117650	4751	NEK2	-1.58439	10.5262	0.00117692	0.00957294	-1
ENSG00000123684	9926	LPGAT1	-1.40939	9.51491	0.0020381	0.013949	-1
ENSG00000143493	25896	INTS7	-1.23804	6.85344	0.00884707	0.0339116	-1
ENSG00000143476	51514	DTL	-2.0143	17.4645	2.92721e-05	0.000616439	-1
ENSG00000065600	55248	PACC1	-1.41506	7.68555	0.00556647	0.0255966	-1
ENSG00000143499	56950	SMYD2	-1.74973	13.4027	0.000251258	0.0032327	-1
ENSG00000152104	5784	PTPN14	-1.50508	10.9991	0.000911586	0.0080337	-1
ENSG00000117724	1063	CENPF	-1.69379	13.4923	0.000239547	0.00312723	-1
ENSG00000042781	7399	USH2A	-2.35264	15.5529	8.02287e-05	0.0013299	-1
ENSG00000092969	7042	TGFB2	-2.05635	18.215	1.97323e-05	0.000451176	-1
ENSG00000143353	127018	LYPLAL1	-1.26034	6.16058	0.0130628	0.0424218	-1
ENSG00000136628	2058	EPRS1	-1.50873	11.1011	0.000862743	0.00772882	-1
ENSG00000067704	55699	IARS2	-1.18566	6.79994	0.00911607	0.034477	-1
ENSG00000118873	25782	RAB3GAP2	-1.15679	6.38033	0.0115392	0.0396253	-1
ENSG00000218283	NA	MORF4L1P1	-1.3112	6.95095	0.00837748	0.0329218	-1
ENSG00000116141	4139	MARK1	-1.40656	7.14094	0.00753439	0.0308655	-1
ENSG00000162817	79762	C1orf115	-1.53987	9.00283	0.00269562	0.0164169	-1
ENSG00000154305	375056	MIA3	-1.31153	8.25214	0.00407039	0.0214295	-1
ENSG00000186063	64853	AIDA	-1.34842	8.53476	0.00348427	0.0193747	-1
ENSG00000162819	148362	BROX	-1.1195	5.99253	0.0143666	0.0446938	-1
ENSG00000143514	7159	TP53BP2	-1.18783	6.67936	0.00975359	0.0358909	-1
ENSG00000188460	NA	ACTBP11	-1.89709	7.37383	0.00661799	0.0284292	-1
ENSG00000143753	8560	DEGS1	-1.07193	5.65186	0.0174369	0.0498938	-1
ENSG00000143771	29097	CNIH4	-1.12296	5.8618	0.0154729	0.046674	-1
ENSG00000162923	80232	WDR26	-1.14828	6.50952	0.0107299	0.0378881	-1
ENSG00000154380	55740	ENAH	-1.29816	8.25645	0.00406075	0.0214002	-1
ENSG00000143742	6726	SRP9	-1.1604	6.51415	0.010702	0.0378255	-1
ENSG00000196187	9725	TMEM63A	-1.22991	6.76927	0.00927409	0.034852	-1
ENSG00000182827	64746	ACBD3	-1.32515	8.41917	0.00371285	0.0201681	-1
ENSG00000143799	142	PARP1	-1.34367	8.67663	0.00322316	0.018431	-1
ENSG00000143801	5664	PSEN2	-1.2625	7.01965	0.00806199	0.03213	-1
ENSG00000143776	8476	CDC42BPA	-1.26752	7.85861	0.00505791	0.0242346	-1
ENSG00000143761	375	ARF1	-1.15743	6.71136	0.00958007	0.0354681	-1
ENSG00000143774	2987	GUK1	-1.33827	8.54368	0.00346725	0.019321	-1
ENSG00000198835	57165	GJC2	-1.47432	6.93879	0.00843463	0.0329898	-1
ENSG00000168159	149603	RNF187	-1.5723	11.7577	0.000605913	0.00611785	-1
ENSG00000116574	58480	RHOU	-1.30731	6.2954	0.0121052	0.0407534	-1
ENSG00000168118	5867	RAB4A	-1.10585	5.76355	0.0163619	0.0481953	-1
ENSG00000154429	126731	CCSAP	-1.63833	11.3919	0.000737653	0.00695685	-1
ENSG00000135776	23456	ABCB10	-1.78692	13.7542	0.00020835	0.00280837	-1
ENSG00000143641	2590	GALNT2	-1.47494	10.5474	0.00116349	0.00949813	-1
ENSG00000135744	183	AGT	-3.00067	19.6914	9.10081e-06	0.000243478	-1
ENSG00000119280	84886	C1orf198	-2.4299	27.249	1.78865e-07	9.1952e-06	-1
ENSG00000223393	NA		-2.42481	16.5103	4.83875e-05	0.000904077	-1
ENSG00000143643	79573	TTC13	-1.82504	13.6582	0.000219277	0.00292078	-1
ENSG00000173409	64801	ARV1	-1.29406	6.99249	0.00818522	0.0324746	-1
ENSG00000116906	8443	GNPAT	-1.10623	5.79745	0.0160495	0.0476906	-1
ENSG00000135766	54583	EGLN1	-1.70293	12.2727	0.000459633	0.00504218	-1
ENSG00000116918	7257	TSNAX	-1.19472	6.51736	0.0106826	0.0378068	-1
ENSG00000059588	6894	TARBP1	-1.21891	5.8719	0.0153845	0.0465324	-1
ENSG00000173726	9804	TOMM20	-1.15151	6.52232	0.0106529	0.0377604	-1
ENSG00000116977	3964	LGALS8	-1.213	7.01883	0.00806569	0.03213	-1
ENSG00000231877	NA		-1.56208	6.12794	0.0133062	0.0429549	-1
ENSG00000155816	56776	FMN2	-2.42999	26.4015	2.77326e-07	1.33413e-05	-1
ENSG00000226919	NA		-4.15173	15.5373	8.08947e-05	0.00133812	-1
ENSG00000182901	6000	RGS7	-2.52356	21.249	4.03329e-06	0.000126731	-1
ENSG00000287516	NA		-1.64168	9.96434	0.00159601	0.0118261	-1
ENSG00000091483	2271	FH	-1.577	11.6501	0.000641991	0.00635567	-1
ENSG00000054277	23596	OPN3	-1.20448	6.44345	0.0111362	0.038775	-1
ENSG00000203668	1122,23596	CHML,OPN3	-1.48898	10.3659	0.00128361	0.0100924	-1
ENSG00000174371	9156	EXO1	-1.98744	15.5729	7.93831e-05	0.00131897	-1
ENSG00000117020	10000	AKT3	-1.34377	8.71909	0.00314894	0.0181451	-1
ENSG00000179456	10472	ZBTB18	-1.72986	12.8266	0.000341735	0.00405112	-1
ENSG00000121644	51029	DESI2	-1.28067	7.8424	0.00510349	0.0243475	-1
ENSG00000162849	55083	KIF26B	-1.89671	15.6635	7.56685e-05	0.00127038	-1
ENSG00000185420	64754	SMYD3	-1.3356	7.73904	0.00540395	0.0251433	-1
ENSG00000162852	163882	CNST	-1.79488	14.5939	0.000133342	0.00196961	-1
ENSG00000143653	51097	SCCPDH	-1.37745	8.86972	0.00289939	0.0171661	-1
ENSG00000162711	114548	NLRP3	-3.17977	24.7436	6.54855e-07	2.75442e-05	-1
ENSG00000175137	80851	SH3BP5L	-1.38667	8.89216	0.00286398	0.0170657	-1
ENSG00000143727	52	ACP1	-1.09811	5.7558	0.0164343	0.048287	-1
ENSG00000130508	7837	PXDN	-2.06501	20.4877	6.00145e-06	0.000173546	-1
ENSG00000032389	7260	EIPR1	-1.38992	8.27381	0.00402211	0.0212476	-1
ENSG00000182551	55256	ADI1	-1.54343	11.2743	0.000785866	0.00725923	-1
ENSG00000235078	NA		-1.81343	7.54647	0.00601276	0.0268076	-1
ENSG00000171865	246243	RNASEH1	-1.14741	6.21934	0.0126362	0.0416993	-1
ENSG00000287126	124907726	LOC124907726	-1.33804	6.05359	0.013878	0.043856	-1
ENSG00000115738	3398	ID2	-1.36139	8.55806	0.00343997	0.0192359	-1
ENSG00000151693	8853	ASAP2	-1.3433	8.59008	0.00338	0.0190769	-1
ENSG00000119185	9270	ITGB1BP1	-1.27908	7.64767	0.00568458	0.0259157	-1
ENSG00000119203	51692	CPSF3	-1.18257	6.52824	0.0106175	0.0376605	-1
ENSG00000134330	285148	IAH1	-1.2153	6.80642	0.00908307	0.0344061	-1
ENSG00000134308	10971	YWHAQ	-1.08335	5.87558	0.0153523	0.0464885	-1
ENSG00000171848	6241	RRM2	-1.9079	16.8642	4.01518e-05	0.000784631	-1
ENSG00000115758	4953	ODC1	-1.56923	11.6	0.000659532	0.00644816	-1
ENSG00000134318	9475	ROCK2	-1.27331	7.84449	0.00509759	0.0243321	-1
ENSG00000162981	151354	LRATD1	-1.85062	9.75528	0.00178809	0.0127791	-1
ENSG00000151779	51594	NBAS	-1.32977	8.44069	0.00366917	0.0200133	-1
ENSG00000079785	1653	DDX1	-1.11101	6.04673	0.0139321	0.0439386	-1
ENSG00000178295	348654	GEN1	-1.29873	6.94424	0.00840894	0.0329549	-1
ENSG00000132031	4148	MATN3	-2.35228	18.5893	1.62127e-05	0.000387014	-1
ENSG00000115884	6382	SDC1	-1.49513	10.3263	0.00131145	0.0102333	-1
ENSG00000143878	388	RHOB	-1.13637	6.41013	0.0113471	0.0391963	-1
ENSG00000118960	64342	HS1BP3	-1.21546	6.51937	0.0106706	0.0377891	-1
ENSG00000143869	151449	GDF7	-2.02435	13.4472	0.000245373	0.00318216	-1
ENSG00000119771	114818	KLHL29	-1.46434	9.72488	0.0018179	0.0128907	-1
ENSG00000173960	165324	UBXN2A	-1.15014	6.13771	0.0132329	0.0427885	-1
ENSG00000163026	80304	WDCP	-1.18552	5.75471	0.0164445	0.0483071	-1
ENSG00000198399	50618	ITSN2	-1.46885	9.95237	0.00160642	0.0118703	-1
ENSG00000138092	79172	CENPO	-1.75258	13.4357	0.000246876	0.00319639	-1
ENSG00000271936	NA		-1.78149	8.83022	0.00296283	0.0174301	-1
ENSG00000143970	55252	ASXL2	-1.10743	5.84895	0.0155864	0.0469441	-1
ENSG00000084731	3797	KIF3C	-1.33556	7.82707	0.00514695	0.024476	-1
ENSG00000138018	85465	SELENOI	-1.299	7.58567	0.00588341	0.0264737	-1
ENSG00000213699	54978	SLC35F6	-1.32315	8.05481	0.00453831	0.0228203	-1
ENSG00000115163	1058	CENPA	-1.83383	13.1318	0.000290325	0.00360466	-1
ENSG00000119777	54867	TMEM214	-1.32714	8.59687	0.00336741	0.0190481	-1
ENSG00000084693	60509	AGBL5	-1.35912	8.38136	0.0037909	0.0204298	-1
ENSG00000228474	100128731	OST4	-1.14337	6.32177	0.0119264	0.0404591	-1
ENSG00000138073	10113	PREB	-1.27301	7.41677	0.00646188	0.0279957	-1
ENSG00000115234	9784	SNX17	-1.25362	7.58709	0.00587878	0.026468	-1
ENSG00000115241	5496	PPM1G	-1.26673	7.6988	0.00552576	0.0254914	-1
ENSG00000115216	29959	NRBP1	-1.14945	6.46452	0.0110049	0.0385221	-1
ENSG00000243147	9553	MRPL33	-1.44132	9.26085	0.00234105	0.0150735	-1
ENSG00000075426	2355	FOSL2	-1.10203	5.94519	0.0147575	0.0453772	-1
ENSG00000213639	5500	PPP1CB	-1.19715	7.01145	0.00809899	0.0322137	-1
ENSG00000115295	79745	CLIP4	-1.4057	9.36752	0.00220864	0.0145605	-1
ENSG00000172954	253558	LCLAT1	-1.76227	12.8995	0.000328677	0.00395897	-1
ENSG00000158125	7498	XDH	-1.73244	10.4115	0.00125232	0.0099532	-1
ENSG00000162961	84661	DPY30	-1.18673	6.28601	0.0121695	0.040877	-1
ENSG00000152683	55676	SLC30A6	-1.36249	8.60658	0.00334951	0.0189673	-1
ENSG00000115760	57448	BIRC6	-1.45536	10.136	0.00145402	0.0110345	-1
ENSG00000152689	25780	RASGRP3	-1.94895	14.6658	0.000128352	0.00192295	-1
ENSG00000119812	25940,105374454	FAM98A,RASGRP3-AS1	-1.58719	11.9224	0.000554627	0.00577422	-1
ENSG00000260025	NA	CRIM1-DT	-2.27747	18.4576	1.7373e-05	0.000407295	-1
ENSG00000150938	51232	CRIM1	-2.80627	35.6193	2.39893e-09	2.15644e-07	-1
ENSG00000171055	9637	FEZ2	-1.274	7.81405	0.00518417	0.0245831	-1
ENSG00000115808	6801	STRN	-1.29616	7.88223	0.00499228	0.0239909	-1
ENSG00000008869	54497	HEATR5B	-1.19077	6.29915	0.0120796	0.0407253	-1
ENSG00000218739	100505876	CEBPZOS	-1.17519	6.48787	0.0108613	0.0381725	-1
ENSG00000011566	8491	MAP4K3	-1.25901	7.37493	0.00661394	0.0284292	-1
ENSG00000231312	728730	MAP4K3-DT	-1.7464	11.7993	0.000592525	0.00603302	-1
ENSG00000227028	100128590	SLC8A1-AS1	-2.64304	18.3367	1.8511e-05	0.000428259	-1
ENSG00000183023	6546	SLC8A1	-2.38269	25.3674	4.73854e-07	2.09388e-05	-1
ENSG00000236090	NA	LDHAP3	-2.32252	20.9427	4.73233e-06	0.000143993	-1
ENSG00000138095	10128	LRPPRC	-1.13576	6.27283	0.0122603	0.0410706	-1
ENSG00000138032	5495	PPM1B	-1.25126	6.44907	0.0111011	0.0387099	-1
ENSG00000068784	55133	SRBD1	-1.17369	6.02267	0.0141233	0.0442488	-1
ENSG00000116016	2034	EPAS1	-1.46231	10.5605	0.00115528	0.00944087	-1
ENSG00000119729	23433	RHOQ	-1.47372	10.3633	0.00128548	0.0100924	-1
ENSG00000222005	388948	LINC01118	-1.70616	8.19856	0.00419236	0.0217872	-1
ENSG00000171150	9655	SOCS5	-1.36117	9.09691	0.00256042	0.0159264	-1
ENSG00000180398	90411	MCFD2	-1.55152	11.726	0.000616318	0.00619508	-1
ENSG00000068724	57217	TTC7A	-1.44601	9.74691	0.00179624	0.0127988	-1
ENSG00000143933	805	CALM2	-1.37624	9.44744	0.00211444	0.0142207	-1
ENSG00000236824	618	BCYRN1	-1.36533	5.7714	0.016289	0.0481297	-1
ENSG00000095002	4436	MSH2	-1.11781	5.82556	0.0157949	0.047267	-1
ENSG00000116062	2956	MSH6	-1.11245	5.96468	0.0145953	0.0450634	-1
ENSG00000233230	100506235	LOC100506235	-1.69963	6.85119	0.0088582	0.033927	-1
ENSG00000170802	3344	FOXN2	-1.6905	12.4559	0.000416684	0.00466254	-1
ENSG00000143942	494143	CHAC2	-2.30354	14.8948	0.000113677	0.00175319	-1
ENSG00000068912	27248	ERLEC1	-1.19025	6.83387	0.00894453	0.0341024	-1
ENSG00000115306	6711	SPTBN1	-1.35523	9.04925	0.00262803	0.0161497	-1
ENSG00000115310	57142	RTN4	-1.6162	12.8833	0.000331521	0.0039659	-1
ENSG00000115355	55704	CCDC88A	-1.26603	7.65932	0.00564799	0.0258175	-1
ENSG00000115380	2202	EFEMP1	-2.10865	20.6549	5.49953e-06	0.000163668	-1
ENSG00000233251	100129434	LOC100129434	-3.19734	31.4942	2.00035e-08	1.38016e-06	-1
ENSG00000055813	114800	CCDC85A	-2.45491	25.4582	4.52081e-07	2.04729e-05	-1
ENSG00000212978	339803	C2orf74-DT	-1.28156	6.42763	0.0112358	0.038978	-1
ENSG00000115464	9736	USP34	-1.31526	8.35351	0.00384943	0.0206322	-1
ENSG00000082898	7514	XPO1	-1.33525	8.64835	0.00327358	0.018665	-1
ENSG00000186889	200728	TMEM17	-1.47205	7.92511	0.00487534	0.0236993	-1
ENSG00000115507	5013	OTX1	-1.43847	6.70408	0.00961926	0.0355714	-1
ENSG00000014641	4190	MDH1	-1.12292	6.07912	0.0136789	0.0435821	-1
ENSG00000169764	7360	UGP2	-1.22053	7.15456	0.00747737	0.0307222	-1
ENSG00000119862	29094	LGALSL	-2.19247	17.5945	2.73372e-05	0.000584297	-1
ENSG00000119844	54812	AFTPH	-1.15621	6.15301	0.0131189	0.0425249	-1
ENSG00000179833	9792	SERTAD2	-1.19898	6.74779	0.0093864	0.0350647	-1
ENSG00000115902	6509	SLC1A4	-1.24266	7.11184	0.00765763	0.0311674	-1
ENSG00000138069	5861	RAB1A	-1.2765	7.93569	0.00484693	0.0236279	-1
ENSG00000138071	10097	ACTR2	-1.53006	11.5394	0.000681363	0.00658262	-1
ENSG00000235885	101927661	LOC101927661	-1.7376	6.68345	0.00973122	0.0358254	-1
ENSG00000143971	54465	ETAA1	-1.44818	9.07955	0.00258483	0.0160339	-1
ENSG00000169604	84168	ANTXR1	-1.22236	7.42631	0.00642771	0.0279509	-1
ENSG00000198380	2673	GFPT1	-1.27559	7.88139	0.0049946	0.0239909	-1
ENSG00000169599	27247	NFU1	-1.16006	5.84419	0.0156285	0.0469849	-1
ENSG00000115977	22848	AAK1	-1.8072	15.1786	9.78061e-05	0.0015557	-1
ENSG00000087338	64395	GMCL1	-2.00561	16.5946	4.62833e-05	0.000875099	-1
ENSG00000059728	4084	MXD1	-1.86506	12.9784	0.000315106	0.0038307	-1
ENSG00000116005	51449	PCYOX1	-1.17727	6.78489	0.00919329	0.0346477	-1
ENSG00000143977	6637	SNRPG	-1.25778	7.0741	0.00782062	0.0315048	-1
ENSG00000035141	84908	FAM136A	-1.47409	9.83892	0.00170858	0.0123909	-1
ENSG00000124370	84693	MCEE	-1.21057	5.69467	0.0170165	0.0492474	-1
ENSG00000124374	400961	PAIP2B	-1.82642	6.74531	0.00939946	0.0350893	-1
ENSG00000144036	23233	EXOC6B	-1.12296	5.9899	0.014388	0.044717	-1
ENSG00000135631	26056	RAB11FIP5	-1.26082	7.70978	0.00549224	0.0253963	-1
ENSG00000135617	84279	PRADC1	-1.2066	5.84406	0.0156298	0.0469849	-1
ENSG00000116127	7840	ALMS1	-1.10983	5.71491	0.0168214	0.0488766	-1
ENSG00000124356	10617	STAMBP	-1.19374	6.61625	0.0101052	0.0366278	-1
ENSG00000163017	72	ACTG2	-2.64217	30.6094	3.1556e-08	2.06836e-06	-1
ENSG00000235499	NA		-2.13149	10.6639	0.00109246	0.00911748	-1
ENSG00000187605	200424	TET3	-1.41638	9.15384	0.00248196	0.0156146	-1
ENSG00000163170	388962	BOLA3	-1.43718	8.27968	0.00400912	0.0212277	-1
ENSG00000065911	10797	MTHFD2	-1.40828	9.53041	0.00202096	0.0138707	-1
ENSG00000204843	1639	DCTN1	-1.50174	10.9099	0.000956518	0.00829949	-1
ENSG00000005448	84058	WDR54	-1.5766	10.622	0.00111752	0.00927436	-1
ENSG00000115275	7841	MOGS	-1.31227	8.11716	0.00438482	0.0223651	-1
ENSG00000286883	NA		-1.61666	6.15822	0.0130803	0.0424434	-1
ENSG00000135622	10505	SEMA4F	-1.38539	8.24522	0.00408594	0.0214754	-1
ENSG00000159399	3099	HK2	-3.54451	50.2851	1.32957e-12	2.94583e-10	-1
ENSG00000204792	102724515	LINC01291	-3.01361	17.0941	3.55719e-05	0.000717489	-1
ENSG00000230836	NA	LINC01293	-2.27853	12.8117	0.000344467	0.00407736	-1
ENSG00000115350	56655	POLE4	-1.48334	9.80274	0.00174252	0.0125684	-1
ENSG00000115364	9801	MRPL19	-1.27815	7.67684	0.0055934	0.0256829	-1
ENSG00000163541	8802	SUCLG1	-1.28208	7.64952	0.00567874	0.0259084	-1
ENSG00000235847	NA	LDHAP7	-2.37082	20.5677	5.75594e-06	0.000167679	-1
ENSG00000186854	129293,105374836	TRABD2A,LOC105374836	-1.58631	8.88537	0.00287465	0.0170941	-1
ENSG00000034510	9168	TMSB10	-1.34127	9.0575	0.0026162	0.0161369	-1
ENSG00000152291	10618	TGOLN2	-1.17773	6.91153	0.00856419	0.0333308	-1
ENSG00000168899	10791	VAMP5	-1.29834	7.74055	0.00539945	0.0251423	-1
ENSG00000115525	8869	ST3GAL5	-1.16191	6.08564	0.0136285	0.0434675	-1
ENSG00000068654	25885	POLR1A	-1.16431	6.51847	0.010676	0.0377997	-1
ENSG00000132305	10989	IMMT	-1.27497	7.77696	0.00529166	0.0248601	-1
ENSG00000132313	51318	MRPL35	-1.16939	6.27723	0.0122299	0.0410203	-1
ENSG00000284879	NA		-1.72621	7.45736	0.00631776	0.0276691	-1
ENSG00000172086	51315	KRCC1	-1.21842	6.53547	0.0105744	0.0375745	-1
ENSG00000144115	55258	THNSL2	-1.21407	5.92637	0.0149159	0.0456859	-1
ENSG00000172071	9451	EIF2AK3	-1.31721	7.89236	0.00496439	0.0239334	-1
ENSG00000286156	NA	BMS1P23	-1.5519	8.17455	0.00424823	0.0219498	-1
ENSG00000115042	51011	FAHD2A	-1.20281	5.96116	0.0146244	0.0451091	-1
ENSG00000084090	56910	STARD7	-1.25573	7.62136	0.00576811	0.0261545	-1
ENSG00000144028	23020	SNRNP200	-1.08249	5.83789	0.0156846	0.0470418	-1
ENSG00000121152	23397	NCAPH	-1.85847	14.658	0.000128889	0.0019255	-1
ENSG00000114982	55683	KANSL3	-1.12433	6.06613	0.0137798	0.0437342	-1
ENSG00000158158	26504	CNNM4	-1.41814	8.45403	0.00364235	0.0199297	-1
ENSG00000213337	51239	ANKRD39	-1.67875	9.80357	0.00174174	0.0125684	-1
ENSG00000135940	1329	COX5B	-1.12838	6.07547	0.0137072	0.0436141	-1
ENSG00000115073	10120	ACTR1B	-1.34063	8.52871	0.00349587	0.0193926	-1
ENSG00000075568	23505	TMEM131	-1.12935	6.16197	0.0130525	0.0423972	-1
ENSG00000115514	10190	TXNDC9	-1.5461	10.7538	0.00104067	0.0088157	-1
ENSG00000115539	79031	PDCL3	-1.46208	8.80446	0.00300495	0.017599	-1
ENSG00000158435	55571	CNOT11	-1.36162	8.63738	0.00329335	0.018737	-1
ENSG00000071054	9448	MAP4K4	-1.16591	6.70818	0.00959716	0.0355147	-1
ENSG00000135953	84804	MFSD9	-1.43252	8.15126	0.00430314	0.0220929	-1
ENSG00000170417	130827	TMEM182	-1.49881	8.18536	0.00422297	0.0218813	-1
ENSG00000186522	151011	SEPTIN10	-1.31146	8.34427	0.00386905	0.020681	-1
ENSG00000198142	65124	SOWAHC	-1.38474	8.92652	0.0028106	0.0168625	-1
ENSG00000144063	7851	MALL	-4.2057	33.5887	6.80886e-09	5.35551e-07	-1
ENSG00000169679	699	BUB1	-2.09831	19.2509	1.14618e-05	0.000292703	-1
ENSG00000172965	541471	MIR4435-2HG	-1.09586	5.6965	0.0169988	0.0492109	-1
ENSG00000153107	64682	ANAPC1	-1.33413	7.94623	0.00481876	0.0235937	-1
ENSG00000169607	150468	CKAP2L	-1.33929	8.2266	0.00412809	0.0216175	-1
ENSG00000125538	3553	IL1B	-3.58072	43.0848	5.2418e-11	7.36238e-09	-1
ENSG00000125637	23550	PSD4	-1.42648	6.74929	0.00937849	0.0350499	-1
ENSG00000189223	654433	PAX8-AS1	-1.29268	7.69884	0.00552564	0.0254914	-1
ENSG00000240356	NA	RPL23AP7	-1.2378	5.80463	0.015984	0.047613	-1
ENSG00000227359	NA	LINC02936	-2.33551	10.9375	0.000942379	0.00821596	-1
ENSG00000115084	80255	SLC35F5	-1.78195	14.8269	0.000117841	0.00180502	-1
ENSG00000115091	10096	ACTR3	-1.79764	15.604	7.80874e-05	0.00130264	-1
ENSG00000088205	8886	DDX18	-1.14834	6.34027	0.0118027	0.040188	-1
ENSG00000236255	NA		-1.46251	6.72056	0.00953078	0.0354045	-1
ENSG00000125629	51141	INSIG2	-1.44752	9.05773	0.00261586	0.0161369	-1
ENSG00000155368	1622	DBI	-1.36276	8.72929	0.00313139	0.0181102	-1
ENSG00000088179	5775	PTPN4	-1.34922	7.75019	0.0053707	0.0250657	-1
ENSG00000115109	57669	EPB41L5	-1.17707	6.2578	0.0123648	0.0412798	-1
ENSG00000144118	5899	RALB	-1.19541	6.90195	0.00861016	0.0334275	-1
ENSG00000163083	3625	INHBB	-1.58449	10.2887	0.00133845	0.0103669	-1
ENSG00000074054	23332	CLASP1	-1.22723	7.23866	0.00713502	0.0297879	-1
ENSG00000169994	4648	MYO7B	-3.1122	24.3525	8.02238e-07	3.25258e-05	-1
ENSG00000272789	NA		-4.1982	21.2729	3.98332e-06	0.000125827	-1
ENSG00000072163	55679	LIMS2	-1.75475	14.4429	0.000144477	0.00209665	-1
ENSG00000136715	79595	SAP130	-1.19944	6.69403	0.00967364	0.0356969	-1
ENSG00000136731	56886	UGGT1	-1.54515	11.4021	0.000733592	0.00693518	-1
ENSG00000136699	55627	SMPD4	-1.20642	6.96377	0.00831768	0.0327851	-1
ENSG00000072135	26469	PTPN18	-1.36183	8.20504	0.00417741	0.0217383	-1
ENSG00000136002	50649	ARHGEF4	-1.89994	13.5121	0.000237031	0.00310211	-1
ENSG00000152102	130074	FAM168B	-1.24686	7.62568	0.00575431	0.0261244	-1
ENSG00000115762	55041	PLEKHB2	-2.03952	19.1197	1.22771e-05	0.000308023	-1
ENSG00000188219	445582	POTEE	-2.44922	17.2531	3.27169e-05	0.000669514	-1
ENSG00000152127	4249	MGAT5	-3.10055	41.9843	9.20106e-11	1.19621e-08	-1
ENSG00000115839	22930	RAB3GAP1	-1.21129	7.12086	0.00761921	0.0310915	-1
ENSG00000048991	23518	R3HDM1	-1.55668	11.2027	0.000816769	0.00743123	-1
ENSG00000076003	4175	MCM6	-1.27434	7.68616	0.00556458	0.0255954	-1
ENSG00000115866	1615	DARS1	-1.47478	10.3457	0.00129778	0.0101619	-1
ENSG00000231890	NA	DARS1-AS1	-1.99761	12.2444	0.000466665	0.00510154	-1
ENSG00000144229	80731	THSD7B	-2.63173	16.5629	4.70637e-05	0.000885597	-1
ENSG00000144228	339745	SPOPL	-1.20535	6.64058	0.00996814	0.0363536	-1
ENSG00000121964	79712	GTDC1	-1.11832	5.65607	0.0173951	0.0498409	-1
ENSG00000121989	92	ACVR2A	-1.19739	6.33474	0.0118395	0.0402872	-1
ENSG00000115947	5000	ORC4	-1.38247	8.51318	0.00352583	0.0194955	-1
ENSG00000150556	130576	LYPD6B	-3.70079	41.9946	9.15271e-11	1.19621e-08	-1
ENSG00000168288	27249	MMADHC	-1.30349	8.16336	0.0042745	0.0220033	-1
ENSG00000115963	390	RND3	-1.19853	7.23991	0.00713004	0.029783	-1
ENSG00000162980	26225	ARL5A	-1.14454	6.06483	0.01379	0.0437342	-1
ENSG00000177917	151188	ARL6IP6	-1.22192	6.27742	0.0122286	0.0410203	-1
ENSG00000162989	3760	KCNJ3	-2.01978	16.8685	4.00602e-05	0.000783814	-1
ENSG00000115159	2820	GPD2	-1.40178	9.04469	0.00263458	0.0161767	-1
ENSG00000136542	11227	GALNT5	-1.15599	6.57213	0.0103588	0.0371109	-1
ENSG00000136560	10010	TANK	-1.11429	5.74559	0.0165301	0.0484418	-1
ENSG00000115233	10213	PSMD14	-1.32393	8.29199	0.00398204	0.021127	-1
ENSG00000232320	NA	MXRA7P1	-1.54398	7.61016	0.00580404	0.0262749	-1
ENSG00000182263	55137	FIGN	-2.09373	17.0161	3.70637e-05	0.000738972	-1
ENSG00000082438	22837	COBLL1	-3.01863	38.9728	4.29749e-10	4.69471e-08	-1
ENSG00000236283	NA		-2.83762	24.0271	9.49896e-07	3.74507e-05	-1
ENSG00000223318	100873381	RNA5SP111	-2.54289	22.2102	2.4437e-06	8.32075e-05	-1
ENSG00000169507	151258	SLC38A11	-3.34708	46.8391	7.70594e-12	1.31763e-09	-1
ENSG00000153253	6328	SCN3A	-1.42348	6.80129	0.00910922	0.034477	-1
ENSG00000136531	6326	SCN2A	-1.72374	9.97508	0.00158673	0.0117829	-1
ENSG00000178662	80034	CSRNP3	-1.2157	5.71648	0.0168064	0.0488509	-1
ENSG00000115339	2591	GALNT3	-2.23445	17.2326	3.30719e-05	0.000674779	-1
ENSG00000123607	79809	TTC21B	-1.3245	7.93478	0.00484935	0.0236279	-1
ENSG00000144285	6323	SCN1A	-5.43025	57.1169	4.10662e-14	1.29203e-11	-1
ENSG00000169432	6335	SCN9A	-2.61332	29.8928	4.5661e-08	2.85037e-06	-1
ENSG00000152253	57405	SPC25	-1.67472	10.9598	0.000931108	0.00815524	-1
ENSG00000081479	4036	LRP2	-5.14265	15.5725	7.94015e-05	0.00131897	-1
ENSG00000154479	129881	CFAP210	-1.66975	6.31607	0.0119648	0.0405294	-1
ENSG00000144362	493911	PHOSPHO2	-1.45199	6.0247	0.014107	0.0442156	-1
ENSG00000144357	130507	UBR3	-1.41628	9.38626	0.00218618	0.0144499	-1
ENSG00000115806	26003	GORASP2	-1.13643	6.37499	0.011574	0.0397186	-1
ENSG00000198586	9874	TLK1	-1.208	6.93819	0.00843746	0.0329927	-1
ENSG00000091409	3655	ITGA6	-3.0692	38.733	4.8592e-10	5.2e-08	-1
ENSG00000232788	101929947	ITGA6-AS1	-2.23108	11.8906	0.000564182	0.00585818	-1
ENSG00000225205	124900513	LOC124900513	-2.67786	20.8584	4.94522e-06	0.000149315	-1
ENSG00000152256	5163	PDK1	-2.58883	28.9834	7.30016e-08	4.30108e-06	-1
ENSG00000091436	51776	MAP3K20	-1.65095	13.1616	0.000285743	0.00355618	-1
ENSG00000144354	83879	CDCA7	-1.67199	10.5879	0.00113831	0.00934848	-1
ENSG00000138430	29789	OLA1	-1.16825	6.57462	0.0103443	0.0371086	-1
ENSG00000163328	151556	GPR155	-1.9992	14.85	0.000116407	0.00179003	-1
ENSG00000128656	1123	CHN1	-2.46873	27.637	1.46356e-07	7.85774e-06	-1
ENSG00000154518	518	ATP5MC3	-1.16787	6.58514	0.0102833	0.0370092	-1
ENSG00000144320	80856	LNPK	-1.46193	10.051	0.00152261	0.0114221	-1
ENSG00000196659	150737	TTC30B	-1.44033	7.69987	0.00552248	0.0254912	-1
ENSG00000197557	92104	TTC30A	-1.50152	8.93509	0.00279743	0.0168249	-1
ENSG00000128655	50940	PDE11A	-2.14789	14.7253	0.000124367	0.00187937	-1
ENSG00000180228	8575	PRKRA	-1.24804	7.28028	0.00697157	0.0293	-1
ENSG00000187231	91404	SESTD1	-1.4486	9.58377	0.00196305	0.0136039	-1
ENSG00000144331	151126	ZNF385B	-2.31136	8.90348	0.00284627	0.0169987	-1
ENSG00000226564	NA	FTH1P20	-1.61753	6.41398	0.0113226	0.0391376	-1
ENSG00000115232	3676	ITGA4	-1.47	10.3801	0.00127379	0.0100592	-1
ENSG00000138434	6744	ITPRID2	-1.24256	7.54859	0.0060057	0.026794	-1
ENSG00000150722	151242	PPP1R1C	-3.11779	7.1366	0.00755264	0.0309161	-1
ENSG00000115252	5136	PDE1A	-2.10762	14.9562	0.000110036	0.00170539	-1
ENSG00000077232	54431	DNAJC10	-1.10372	5.9635	0.014605	0.0450758	-1
ENSG00000162999	142679	DUSP19	-1.37027	6.58893	0.0102615	0.0369809	-1
ENSG00000138448	3685	ITGAV	-1.38434	9.43634	0.00212727	0.0142359	-1
ENSG00000144366	51454	GULP1	-1.36201	8.67722	0.00322213	0.018431	-1
ENSG00000204262	1290	COL5A2	-1.95518	18.6618	1.56081e-05	0.000374856	-1
ENSG00000151690	54842	MFSD6	-1.77396	14.393	0.00014835	0.00213904	-1
ENSG00000138386	4664	NAB1	-1.60709	11.9207	0.000555136	0.00577569	-1
ENSG00000235852	NA		-2.05986	12.875	0.000332993	0.00397739	-1
ENSG00000115419	2744	GLS	-1.88727	16.9389	3.86033e-05	0.00076386	-1
ENSG00000115415	6772	STAT1	-1.25928	7.86972	0.00502694	0.0241167	-1
ENSG00000128641	4430	MYO1B	-1.52766	11.3679	0.000747254	0.0070054	-1
ENSG00000173559	64859	NABP1	-2.18084	19.734	8.9003e-06	0.000238926	-1
ENSG00000168497	8436	CAVIN2	-3.48619	38.109	6.69003e-10	6.83382e-08	-1
ENSG00000144339	23671	TMEFF2	-3.62726	37.2237	1.05326e-09	1.0165e-07	-1
ENSG00000223466	124908063	LOC124908063	-2.67391	17.3751	3.06813e-05	0.000635899	-1
ENSG00000196950	57181	SLC39A10	-2.05949	18.6731	1.55158e-05	0.00037321	-1
ENSG00000081320	9262	STK17B	-1.3766	8.94987	0.0027749	0.0167441	-1
ENSG00000138411	57520	HECW2	-1.45241	9.69571	0.00184699	0.0130256	-1
ENSG00000119042	23314	SATB2	-1.19319	6.45531	0.0110621	0.0386535	-1
ENSG00000225953	150538	SATB2-AS1	-1.31432	6.26685	0.0123018	0.0411831	-1
ENSG00000226124	348751	FTCDNL1	-2.0584	8.50217	0.00354724	0.0195678	-1
ENSG00000196141	26010	SPATS2L	-1.08928	5.82547	0.0157957	0.047267	-1
ENSG00000155729	130535	KCTD18	-1.14049	5.79239	0.0160957	0.0477648	-1
ENSG00000163535	151246	SGO2	-1.56787	10.665	0.00109183	0.00911748	-1
ENSG00000138356	316	AOX1	-2.64616	26.5055	2.62789e-07	1.2759e-05	-1
ENSG00000082153	9689	BZW1	-1.3036	8.34611	0.00386514	0.020677	-1
ENSG00000155744	285172	HYCC2	-1.28096	7.19201	0.00732288	0.0303068	-1
ENSG00000119013	4709	NDUFB3	-1.34358	8.04158	0.00457157	0.0229081	-1
ENSG00000003402	8837	CFLAR	-1.09899	5.78634	0.0161512	0.0478644	-1
ENSG00000232133	100874399	IMPDH1P10	-3.54436	18.7774	1.46898e-05	0.000359386	-1
ENSG00000115993	66008	TRAK2	-1.2326	7.28577	0.0069503	0.0292497	-1
ENSG00000155754	151254	C2CD6	-1.6151	5.71142	0.0168549	0.0489378	-1
ENSG00000003393	57679	ALS2	-1.83242	15.3637	8.86769e-05	0.00144314	-1
ENSG00000138395	65061	CDK15	-1.69867	12.9311	0.000323165	0.00390454	-1
ENSG00000182329	100652824	KIAA2012	-2.45809	16.288	5.44086e-05	0.00098834	-1
ENSG00000222035	729224	KIAA2012-AS1	-4.59545	61.6757	4.04945e-15	1.55371e-12	-1
ENSG00000144426	65065	NBEAL1	-2.19772	19.4413	1.03737e-05	0.00027018	-1
ENSG00000138443	10152	ABI2	-1.20515	6.99087	0.00819267	0.0324959	-1
ENSG00000173166	65059	RAPH1	-1.16006	6.40646	0.0113706	0.0392432	-1
ENSG00000116117	117583	PARD3B	-1.92889	17.1944	3.37436e-05	0.000685815	-1
ENSG00000023228	4719	NDUFS1	-1.26009	7.64253	0.00570078	0.0259638	-1
ENSG00000204186	57683	ZDBF2	-1.24189	6.73277	0.00946577	0.0352524	-1
ENSG00000229647	105373853	MYOSLID	-2.04044	11.8448	0.000578237	0.00594526	-1
ENSG00000144401	151194	METTL21A	-1.34833	7.21272	0.00723888	0.030062	-1
ENSG00000163249	151195	CCNYL1	-1.54077	10.6584	0.00109573	0.00913456	-1
ENSG00000163251	7855	FZD5	-1.58523	8.67155	0.00323216	0.0184623	-1
ENSG00000115020	200576	PIKFYVE	-1.10584	5.7692	0.0163095	0.0481359	-1
ENSG00000078018	4133	MAP2	-1.7397	12.4797	0.0004114	0.00463591	-1
ENSG00000197713	6120	RPE	-1.18447	6.61735	0.010099	0.0366278	-1
ENSG00000115365	10314	LANCL1	-1.60599	12.1746	0.000484451	0.00524134	-1
ENSG00000021826	1373	CPS1	-1.2078	6.50613	0.0107503	0.0379517	-1
ENSG00000178568	2066	ERBB4	-1.95698	9.19783	0.00242302	0.0153996	-1
ENSG00000030419	22807	IKZF2	-2.91945	32.6108	1.12586e-08	8.315e-07	-1
ENSG00000270659	NA		-1.8457	7.35235	0.00669751	0.0286338	-1
ENSG00000138376	580	BARD1	-1.27121	6.94794	0.00839157	0.0329326	-1
ENSG00000115414	2335	FN1	-1.34161	9.19464	0.00242725	0.0154088	-1
ENSG00000235770	646324	LINC00607	-1.93042	10.9121	0.000955396	0.00829433	-1
ENSG00000115425	55825	PECR	-1.22788	5.75336	0.0164572	0.048309	-1
ENSG00000279348	NA		-1.50316	8.72559	0.00313775	0.0181148	-1
ENSG00000144583	57574	MARCHF4	-2.50614	27.4417	1.61901e-07	8.48956e-06	-1
ENSG00000115461	3488	IGFBP5	-3.60735	55.7917	8.05718e-14	2.29343e-11	-1
ENSG00000236886			-4.03134	45.991	1.18798e-11	1.92661e-09	-1
ENSG00000233143	NA	DIRC3-AS1	-3.0286	26.3862	2.79526e-07	1.34062e-05	-1
ENSG00000231672	NA	DIRC3	-3.77495	43.3946	4.47417e-11	6.39847e-09	-1
ENSG00000163466	10109	ARPC2	-1.87186	16.8166	4.11718e-05	0.000801577	-1
ENSG00000261338	NA		-1.37627	6.73484	0.00945476	0.035228	-1
ENSG00000127838	25953	PNKD	-1.23041	6.92414	0.00850397	0.0331703	-1
ENSG00000135926	64114	TMBIM1	-1.24318	7.5404	0.00603308	0.02685	-1
ENSG00000273361	NA		-2.10425	7.02645	0.00803144	0.0320585	-1
ENSG00000135913	57695	USP37	-1.697	12.2933	0.000454597	0.0049939	-1
ENSG00000144580	9125	CNOT9	-1.28371	7.80708	0.0052042	0.0246366	-1
ENSG00000115649	27013	CNPPD1	-1.17798	6.57333	0.0103518	0.0371086	-1
ENSG00000115657	10058	ABCB6	-1.62421	8.73298	0.00312506	0.0180936	-1
ENSG00000198925	79065	ATG9A	-1.52003	10.6998	0.00107146	0.0089846	-1
ENSG00000163516	55139	ANKZF1	-1.48498	9.0841	0.00257841	0.016013	-1
ENSG00000127824	7277	TUBA4A	-1.95957	16.1046	5.99376e-05	0.0010642	-1
ENSG00000135924	3300	DNAJB2	-1.1856	6.6157	0.0101083	0.0366278	-1
ENSG00000072195	10290	SPEG	-1.31515	8.16519	0.00427019	0.0219956	-1
ENSG00000144591	29926	GMPPA	-1.3054	7.91911	0.00489152	0.0237203	-1
ENSG00000123989	79586	CHPF	-2.92521	37.6315	8.54546e-10	8.40179e-08	-1
ENSG00000124006	23363	OBSL1	-1.2683	7.74412	0.00538876	0.0251247	-1
ENSG00000123999	3623	INHA	-1.82731	7.29698	0.00690708	0.0291457	-1
ENSG00000144589	114790	STK11IP	-1.38043	7.99698	0.00468553	0.0232151	-1
ENSG00000114923	6508	SLC4A3	-1.79513	13.9434	0.0001884	0.00259293	-1
ENSG00000116106	2043	EPHA4	-1.4727	10.0413	0.0015307	0.01145	-1
ENSG00000272944	NA		-1.77926	9.18112	0.00244524	0.0154856	-1
ENSG00000123983	2181	ACSL3	-1.48765	10.6066	0.00112683	0.00931435	-1
ENSG00000152049	23704	KCNE4	-2.11403	16.5079	4.84481e-05	0.000904077	-1
ENSG00000152056	130340	AP1S3	-1.93127	10.1114	0.00147352	0.0111281	-1
ENSG00000135905	55619	DOCK10	-2.09619	20.0013	7.73895e-06	0.000213207	-1
ENSG00000144468	84236	RHBDD1	-1.18507	6.54438	0.0105216	0.0374979	-1
ENSG00000081052	1286	COL4A4	-3.87926	41.0604	1.47599e-10	1.84276e-08	-1
ENSG00000168958	56947	MFF	-1.09489	5.74023	0.0165806	0.0485265	-1
ENSG00000173744	3267	AGFG1	-1.19631	6.88868	0.00867433	0.0335469	-1
ENSG00000153820	80309	SPHKAP	-2.67478	30.0361	4.24067e-08	2.68992e-06	-1
ENSG00000153827	9320	TRIP12	-1.27934	8.06433	0.00451451	0.0227548	-1
ENSG00000173692	5707	PSMD1	-1.35024	8.77037	0.00306163	0.0178314	-1
ENSG00000135914	3357	HTR2B	-3.64382	37.9584	7.22677e-10	7.33447e-08	-1
ENSG00000135931	80210	ARMC9	-1.53614	11.2824	0.000782434	0.00724052	-1
ENSG00000135930	9470	EIF4E2	-1.32595	8.41847	0.00371429	0.020169	-1
ENSG00000115468	80303	EFHD1	-3.14867	40.8222	1.66727e-10	2.06519e-08	-1
ENSG00000085978	55054	ATG16L1	-1.21596	6.65753	0.00987379	0.0361472	-1
ENSG00000077044	8527	DGKD	-1.50799	10.0284	0.00154143	0.0115029	-1
ENSG00000123485	55355	HJURP	-2.3481	23.3033	1.38365e-06	5.10945e-05	-1
ENSG00000188042	10123	ARL4C	-1.33212	7.05818	0.00789041	0.0316966	-1
ENSG00000157985	116987	AGAP1	-1.266	7.39106	0.00655488	0.0282816	-1
ENSG00000124831	9208	LRRFIP1	-1.22568	7.27483	0.00699275	0.0293576	-1
ENSG00000144488	339768	ESPNL	-1.38452	6.2174	0.0126501	0.0417013	-1
ENSG00000168427	377007	KLHL30	-7.28508	65.5321	5.7175e-16	2.64535e-13	-1
ENSG00000178752	151176	ERFE	-1.47976	6.96327	0.00831998	0.032786	-1
ENSG00000144485	55502	HES6	-1.52359	7.60469	0.00582165	0.0263011	-1
ENSG00000065802	51665	ASB1	-1.12266	6.00284	0.0142829	0.0445536	-1
ENSG00000130414	4705	NDUFA10	-1.09299	5.73	0.0166775	0.0486612	-1
ENSG00000172428	150678	COPS9	-1.24108	6.93531	0.00845104	0.0330189	-1
ENSG00000063660	2817	GPC1	-2.56582	30.0109	4.29623e-08	2.70336e-06	-1
ENSG00000142327	57140	RNPEPL1	-1.67216	12.997	0.000311983	0.00380494	-1
ENSG00000115687	23178	PASK	-1.23945	5.78923	0.0161246	0.0478146	-1
ENSG00000115685	5510	PPP1R7	-1.23827	7.25659	0.00706412	0.029568	-1
ENSG00000146205	50636	ANO7	-2.872	21.0593	4.45275e-06	0.000137615	-1
ENSG00000115677	3069	HDLBP	-1.53184	11.729	0.000615343	0.00619508	-1
ENSG00000168385	4735	SEPTIN2	-1.16066	6.79295	0.00915184	0.0345577	-1
ENSG00000006607	9855	FARP2	-1.65817	12.7335	0.000359172	0.0042071	-1
ENSG00000115694	10494	STK25	-1.36982	8.9368	0.00279482	0.0168249	-1
ENSG00000176720	666	BOK	-1.60335	11.669	0.000635492	0.00633118	-1
ENSG00000168393	1841	DTYMK	-1.39792	8.52999	0.00349341	0.0193926	-1
ENSG00000215692	NA		-1.70612	6.07494	0.0137113	0.0436159	-1
ENSG00000134109	9695	EDEM1	-1.47016	10.1419	0.00144936	0.0110252	-1
ENSG00000125046	51066	SSUH2	-2.3947	11.3633	0.000749082	0.00701417	-1
ENSG00000180914	5021	OXTR	-3.64647	55.7657	8.16428e-14	2.29343e-11	-1
ENSG00000070950	56852	RAD18	-1.55298	10.8907	0.000966459	0.00834433	-1
ENSG00000163719	64419	MTMR14	-1.25013	7.01978	0.0080614	0.03213	-1
ENSG00000171148	10474	TADA3	-1.15738	6.46521	0.0110007	0.0385159	-1
ENSG00000241553	10093	ARPC4	-1.25579	7.54249	0.00602608	0.0268317	-1
ENSG00000156990	285367	RPUSD3	-1.18752	5.97492	0.0145107	0.0449085	-1
ENSG00000163701	132014	IL17RE	-1.91027	10.1069	0.00147718	0.0111505	-1
ENSG00000163703	78987	CRELD1	-1.38621	6.12368	0.0133383	0.0430055	-1
ENSG00000186162	152302	CIDECP1	-1.24497	6.10685	0.0134659	0.0431575	-1
ENSG00000144554	2177	FANCD2	-2.04687	16.5875	4.64552e-05	0.000876243	-1
ENSG00000157020	6396	SEC13	-1.24766	7.57535	0.0059172	0.0265498	-1
ENSG00000196639	3269	HRH1	-1.41186	9.13056	0.00251375	0.0157797	-1
ENSG00000285906	102723663	LOC102723663	-1.37167	6.38697	0.0114961	0.0395117	-1
ENSG00000197548	10533	ATG7	-1.10408	5.65872	0.0173688	0.0497867	-1
ENSG00000132155	5894	RAF1	-1.12725	6.16942	0.0129977	0.042289	-1
ENSG00000088726	55287	TMEM40	-5.78629	21.6312	3.30429e-06	0.000107396	-1
ENSG00000131375	23473	CAPN7	-1.24105	7.2318	0.00716235	0.0298545	-1
ENSG00000131373	26061	HACL1	-1.38077	8.09444	0.00444013	0.0224975	-1
ENSG00000206560	23243	ANKRD28	-1.18512	6.77854	0.00922604	0.0347212	-1
ENSG00000131386	117248	GALNT15	-2.99139	26.6303	2.46349e-07	1.20726e-05	-1
ENSG00000154814	92106	OXNAD1	-1.40925	7.40267	0.0065127	0.0281305	-1
ENSG00000129810	151648	SGO1	-1.72806	11.2154	0.00081121	0.00740851	-1
ENSG00000151789	79750	ZNF385D	-1.30312	5.64688	0.0174865	0.0499327	-1
ENSG00000182247	7325	UBE2E2	-1.3577	8.20075	0.00418731	0.0217754	-1
ENSG00000151092	55768	NGLY1	-1.25134	6.89998	0.00861967	0.033439	-1
ENSG00000151093	54995	OXSM	-1.30854	6.59844	0.0102068	0.0368857	-1
ENSG00000163491	152110	NEK10	-1.89353	10.8539	0.000985857	0.00846535	-1
ENSG00000033867	9497	SLC4A7	-1.69928	13.3346	0.000260551	0.00331643	-1
ENSG00000271943	NA		-1.61391	9.30417	0.00228633	0.0148657	-1
ENSG00000187118	152100	CMC1	-1.31679	6.81697	0.00902955	0.0343018	-1
ENSG00000163512	64343	AZI2	-1.3065	8.10131	0.00442333	0.0224572	-1
ENSG00000163527	201595	STT3B	-1.19644	6.98348	0.00822656	0.0325811	-1
ENSG00000152642	23171	GPD1L	-1.46287	9.24268	0.00236438	0.0151627	-1
ENSG00000091317	54918	CMTM6	-1.11652	6.05824	0.0138416	0.0438024	-1
ENSG00000144635	51143	DYNC1LI1	-1.19346	6.78834	0.00917552	0.0346119	-1
ENSG00000173705	26032	SUSD5	-2.25801	18.0148	2.19194e-05	0.000494003	-1
ENSG00000153558	25827	FBXL2	-1.51034	8.90615	0.00284212	0.0169892	-1
ENSG00000144681	6769	STAC	-3.87831	37.3926	9.65896e-10	9.37932e-08	-1
ENSG00000168016	9881	TRANK1	-1.15454	5.75441	0.0164473	0.0483071	-1
ENSG00000093167	9209	LRRFIP2	-1.90056	16.7804	4.19656e-05	0.000813006	-1
ENSG00000224080	NA	UBE2FP1	-1.56723	7.08799	0.00776023	0.0313635	-1
ENSG00000144674	2803	GOLGA4	-1.18804	6.86484	0.00879079	0.0337845	-1
ENSG00000144677	10217	CTDSPL	-1.80274	15.0125	0.000106804	0.00167011	-1
ENSG00000060971	30	ACAA1	-1.19483	6.65506	0.00988745	0.0361804	-1
ENSG00000172939	9943	OXSR1	-1.68976	13.389	0.000253111	0.0032477	-1
ENSG00000114745	64689	GORASP1	-1.21511	6.94724	0.00839486	0.0329326	-1
ENSG00000168334	165904	XIRP1	-5.32996	37.7805	7.91682e-10	7.93245e-08	-1
ENSG00000168329	1524	CX3CR1	-4.53502	34.7233	3.80047e-09	3.21425e-07	-1
ENSG00000168036	1499	CTNNB1	-1.11686	6.22566	0.0125912	0.0416362	-1
ENSG00000182606	22906	TRAK1	-1.3929	9.15519	0.00248013	0.0156122	-1
ENSG00000093183	9117	SEC22C	-1.24757	7.37542	0.00661215	0.0284292	-1
ENSG00000114853	92999	ZBTB47	-1.09189	5.71667	0.0168046	0.0488509	-1
ENSG00000181061	25994	HIGD1A	-1.56515	11.0292	0.000896856	0.00795739	-1
ENSG00000160746	55129	ANO10	-1.57853	11.5602	0.000673799	0.00653083	-1
ENSG00000011198	51099	ABHD5	-1.17508	6.32572	0.0118999	0.0404228	-1
ENSG00000179152	285343	TCAIM	-2.18844	19.3087	1.11199e-05	0.000285362	-1
ENSG00000214820	NA	MPRIPP1	-1.56017	5.9864	0.0144166	0.0447749	-1
ENSG00000163808	56992	KIF15	-1.33918	7.32804	0.00678871	0.0288241	-1
ENSG00000163812	51304	ZDHHC3	-1.17376	6.59323	0.0102367	0.0369428	-1
ENSG00000144791	8994	LIMD1	-1.30792	7.88191	0.00499318	0.0239909	-1
ENSG00000178038	259173	ALS2CL	-2.78403	27.0497	1.98294e-07	1.00206e-05	-1
ENSG00000160808	4634	MYL3	-1.58396	8.27602	0.00401721	0.0212419	-1
ENSG00000160796	23218	NBEAL2	-1.5003	9.00634	0.00269045	0.016403	-1
ENSG00000114648	23276	KLHL18	-1.28173	7.38713	0.00656921	0.0283279	-1
ENSG00000114650	22937	SCAP	-1.0942	5.74929	0.0164953	0.0483759	-1
ENSG00000163832	54859	ELP6	-1.2255	6.3411	0.0117971	0.0401777	-1
ENSG00000047849	4134	MAP4	-1.43519	10.2483	0.00136811	0.0105447	-1
ENSG00000164045	993	CDC25A	-1.64986	10.3149	0.00131958	0.0102561	-1
ENSG00000164050	5364	PLXNB1	-1.45605	9.45488	0.00210588	0.0141935	-1
ENSG00000164051	79714	CCDC51	-1.38789	7.47807	0.00624548	0.0274676	-1
ENSG00000244380	NA		-1.97448	9.744	0.00179909	0.0128119	-1
ENSG00000114268	5210	PFKFB4	-2.66033	27.0453	1.98744e-07	1.00206e-05	-1
ENSG00000114270	1294	COL7A1	-1.64465	12.9825	0.000314409	0.00382815	-1
ENSG00000010256	7384	UQCRC1	-1.17974	6.74343	0.00940935	0.0351087	-1
ENSG00000008300	1951	CELSR3	-1.24662	6.11706	0.0133883	0.0430504	-1
ENSG00000213672	51517	NCKIPSD	-1.42527	8.88887	0.00286914	0.0170828	-1
ENSG00000114302	5576	PRKAR2A	-1.19717	6.85089	0.00885972	0.033927	-1
ENSG00000224424	100506637	PRKAR2A-AS1	-1.74683	9.07172	0.00259593	0.0160774	-1
ENSG00000178057	25915	NDUFAF3	-1.18166	6.43482	0.0111904	0.038892	-1
ENSG00000172037	3913	LAMB2	-2.45817	28.0167	1.20273e-07	6.61543e-06	-1
ENSG00000114316	7375	USP4	-1.1568	6.29809	0.0120868	0.0407332	-1
ENSG00000233276	2876	GPX1	-1.3052	8.18591	0.00422171	0.0218813	-1
ENSG00000067560	387	RHOA	-1.77707	15.3639	8.86672e-05	0.00144314	-1
ENSG00000145022	6988	TCTA	-1.63987	10.9391	0.000941578	0.00821518	-1
ENSG00000173402	1605	DAG1	-2.05935	19.9856	7.80291e-06	0.000214219	-1
ENSG00000164062	327	APEH	-1.36568	8.77757	0.00304957	0.0177905	-1
ENSG00000164068	63891	RNF123	-1.33205	8.15404	0.00429652	0.0220878	-1
ENSG00000173540	29925	GMPPB	-1.39468	8.44107	0.0036684	0.0200133	-1
ENSG00000183763	10293	TRAIP	-1.43668	7.57268	0.00592596	0.0265815	-1
ENSG00000001617	6405	SEMA3F	-1.43011	7.47992	0.00623908	0.0274537	-1
ENSG00000114353	2771	GNAI2	-1.60402	12.6325	0.00037909	0.00437846	-1
ENSG00000012171	7869	SEMA3B	-1.99481	17.7544	2.51332e-05	0.000547605	-1
ENSG00000186792	8372	HYAL3	-1.35948	6.96831	0.00829659	0.0327677	-1
ENSG00000243477	24142	NAA80	-1.36038	7.02438	0.00804071	0.0320874	-1
ENSG00000068028	11186	RASSF1	-1.64571	12.323	0.000447415	0.00493223	-1
ENSG00000114395	11068	CYB561D2	-1.4676	8.21873	0.00414602	0.0216681	-1
ENSG00000088543	51161	C3orf18	-1.51344	9.67523	0.00186769	0.0131281	-1
ENSG00000114738	7867	MAPKAPK3	-1.28427	7.44372	0.00636583	0.0278055	-1
ENSG00000088538	1795	DOCK3	-1.76584	9.34326	0.00223807	0.0146443	-1
ENSG00000145050	7873	MANF	-1.28133	7.62263	0.00576404	0.0261535	-1
ENSG00000041880	10039	PARP3	-1.53065	10.5109	0.00118671	0.00964267	-1
ENSG00000090097	57060	PCBP4	-1.1838	6.62454	0.0100583	0.0365506	-1
ENSG00000164087	25886	POC1A	-1.83677	13.2508	0.000272467	0.00343169	-1
ENSG00000247596	11344	TWF2	-1.15146	6.28798	0.012156	0.0408601	-1
ENSG00000168268	64943	NT5DC2	-1.36177	8.86704	0.00290365	0.0171784	-1
ENSG00000168273	440957	SMIM4	-1.3511	6.96763	0.00829973	0.0327718	-1
ENSG00000163939	55193	PBRM1	-1.12872	6.12265	0.0133461	0.0430132	-1
ENSG00000162267	3699	ITIH3	-5.98692	65.9949	4.52092e-16	2.15511e-13	-1
ENSG00000163932	5580	PRKCD	-1.19685	6.57805	0.0103244	0.0370722	-1
ENSG00000163931	7086	TKT	-1.86929	16.7979	4.15804e-05	0.000807532	-1
ENSG00000113812	93973	ACTR8	-1.12504	5.87055	0.0153963	0.0465408	-1
ENSG00000187672	26059	ERC2	-3.7004	23.5165	1.23844e-06	4.70577e-05	-1
ENSG00000168374	378	ARF4	-1.60342	12.5388	0.000398583	0.00455346	-1
ENSG00000163681	7871	SLMAP	-1.13177	6.05668	0.0138538	0.0438322	-1
ENSG00000136068	2317	FLNB	-1.32951	8.73194	0.00312684	0.0180973	-1
ENSG00000163686	57406	ABHD6	-1.91417	13.6061	0.000225455	0.00299293	-1
ENSG00000168291	5162	PDHB	-1.61817	12.1905	0.000480333	0.00520035	-1
ENSG00000241472	100506994	PTPRG-AS1	-1.63387	8.11439	0.00439152	0.0223787	-1
ENSG00000163636	9861	PSMD6	-1.1357	6.12027	0.013364	0.0430181	-1
ENSG00000151276	9223	MAGI1	-1.84951	15.1593	9.88085e-05	0.00156689	-1
ENSG00000241506	151645	PSMC1P1	-1.71206	8.13584	0.00433987	0.0222065	-1
ENSG00000163378	285203	EOGT	-1.41911	9.09742	0.00255971	0.0159264	-1
ENSG00000144744	9039	UBA3	-1.24445	7.31205	0.00684937	0.0289877	-1
ENSG00000187098	4286	MITF	-1.10145	5.69125	0.0170498	0.0492761	-1
ENSG00000144736	55164	SHQ1	-1.16909	6.01594	0.0141772	0.0443295	-1
ENSG00000242516	401074	LINC00960	-1.77402	8.69486	0.00319109	0.0183008	-1
ENSG00000240809	401076	CAP1P1	-1.78048	9.63689	0.00190708	0.0133315	-1
ENSG00000114480	2632	GBE1	-1.52748	11.1136	0.000856974	0.00770347	-1
ENSG00000206538	389136	VGLL3	-1.331	8.71765	0.00315143	0.0181498	-1
ENSG00000083937	25978	CHMP2B	-1.13767	6.16333	0.0130426	0.0423735	-1
ENSG00000175105	55279	ZNF654	-1.16311	6.2054	0.0127361	0.0418544	-1
ENSG00000170854	84864	RIOX2	-1.41972	9.06203	0.00260973	0.0161319	-1
ENSG00000080819	1371	CPOX	-1.43725	8.88407	0.00287669	0.0170961	-1
ENSG00000057019	131566	DCBLD2	-1.48325	10.4944	0.0011974	0.00969497	-1
ENSG00000144810	1295	COL8A1	-2.20502	22.7129	1.881e-06	6.64944e-05	-1
ENSG00000181458	55076	TMEM45A	-1.49402	10.4371	0.00123507	0.00987244	-1
ENSG00000114354	10342	TFG	-1.36782	9.07288	0.00259429	0.0160735	-1
ENSG00000182504	79598	CEP97	-1.45236	9.05379	0.00262151	0.0161369	-1
ENSG00000144815	91775	NXPE3	-1.14009	6.13663	0.0132409	0.0428059	-1
ENSG00000170017	214	ALCAM	-2.43948	27.2611	1.77756e-07	9.16812e-06	-1
ENSG00000114423	868	CBLB	-1.41105	8.7961	0.00301875	0.0176601	-1
ENSG00000243701	344595	DUBR	-1.66986	12.6454	0.000376493	0.0043629	-1
ENSG00000239828	NA	CCDC54-AS1	-1.68683	6.5826	0.010298	0.0370367	-1
ENSG00000114439	56987	BBX	-1.19353	6.90328	0.00860377	0.0334187	-1
ENSG00000163507	57650	CIP2A	-1.46946	9.15573	0.00247941	0.0156122	-1
ENSG00000177707	25945	NECTIN3	-1.13028	6.15858	0.0130776	0.0424434	-1
ENSG00000240891	257068	PLCXD2	-1.60888	9.50797	0.00204582	0.0139746	-1
ENSG00000144827	55347	ABHD10	-1.19914	6.43974	0.0111595	0.0388299	-1
ENSG00000138459	55032	SLC35A5	-1.20935	6.66792	0.00981638	0.0360293	-1
ENSG00000091986	151887	CCDC80	-2.30739	24.9157	5.98941e-07	2.56728e-05	-1
ENSG00000163607	29083	GTPBP8	-1.26117	6.44765	0.0111099	0.038725	-1
ENSG00000114573	523	ATP6V1A	-1.51189	10.8248	0.0010015	0.00856228	-1
ENSG00000178075	54762	GRAMD1C	-2.26602	17.6531	2.65076e-05	0.000571221	-1
ENSG00000184307	254887	ZDHHC23	-1.59016	9.51003	0.00204352	0.0139707	-1
ENSG00000181722	26137	ZBTB20	-1.23416	5.95806	0.0146502	0.0451532	-1
ENSG00000185565	4045	LSAMP	-1.46642	6.53905	0.0105531	0.0375507	-1
ENSG00000198406	NA	BZW1P2	-1.33206	5.76944	0.0163072	0.0481359	-1
ENSG00000121578	8702	B4GALT4	-1.32047	8.18317	0.00422807	0.0219005	-1
ENSG00000113845	51300	TIMMDC1	-1.25012	7.08084	0.00779126	0.0314429	-1
ENSG00000144843	141	ADPRH	-2.9941	21.4621	3.60885e-06	0.000116334	-1
ENSG00000138495	10063	COX17	-1.19676	5.67529	0.0172055	0.0495171	-1
ENSG00000082701	2932	GSK3B	-1.68226	13.3586	0.000257244	0.00328598	-1
ENSG00000242622	NA	GSK3B-DT	-1.58704	6.85655	0.00883168	0.0338857	-1
ENSG00000240661	NA	LRRC58-DT	-1.94199	11.0266	0.00089812	0.0079641	-1
ENSG00000163430	11167	FSTL1	-2.05647	20.5708	5.7466e-06	0.000167679	-1
ENSG00000144840	285282	RABL3	-1.13808	5.96531	0.01459	0.0450561	-1
ENSG00000051341	10721	POLQ	-2.08925	15.904	6.66381e-05	0.00115431	-1
ENSG00000180353	3059	HCLS1	-1.51875	8.38185	0.00378986	0.0204298	-1
ENSG00000173230	2804	GOLGB1	-1.18062	6.85137	0.00885733	0.033927	-1
ENSG00000114023	26355	FAM162A	-1.16881	6.30972	0.0120078	0.0406225	-1
ENSG00000114030	3836	KPNA1	-1.24349	7.44171	0.00637294	0.0278127	-1
ENSG00000138463	84925	SLC49A4	-1.33318	7.15196	0.00748822	0.0307398	-1
ENSG00000206527	201562	HACD2	-1.95646	17.589	2.74168e-05	0.000585202	-1
ENSG00000065534	4638	MYLK	-2.32951	25.5155	4.38852e-07	2.00104e-05	-1
ENSG00000173706	57493	HEG1	-1.60138	12.5333	0.000399759	0.00456027	-1
ENSG00000221955	84561	SLC12A8	-1.78528	12.1166	0.000499746	0.00533707	-1
ENSG00000163848	7707	ZNF148	-1.25066	7.4847	0.00622254	0.0274116	-1
ENSG00000114520	8723	SNX4	-1.842	15.1305	0.000100328	0.00158619	-1
ENSG00000144909	114885	OSBPL11	-1.20069	6.47667	0.0109299	0.0383193	-1
ENSG00000241288	101927056	LINC02614	-1.51879	8.42602	0.00369888	0.02012	-1
ENSG00000248787	NA		-1.92894	8.56274	0.00343113	0.0192052	-1
ENSG00000171084	100125556	FAM86JP	-1.89968	11.9665	0.000541647	0.00568422	-1
ENSG00000144908	10840	ALDH1L1	-3.52861	26.0837	3.26929e-07	1.54442e-05	-1
ENSG00000197763	114112	TXNRD3	-1.39359	7.73323	0.00542136	0.0251871	-1
ENSG00000114554	5361	PLXNA1	-1.41924	9.80394	0.00174139	0.0125684	-1
ENSG00000073111	4171	MCM2	-1.64391	12.5076	0.0004053	0.00459681	-1
ENSG00000074416	11343	MGLL	-1.47924	10.7247	0.00105716	0.00892486	-1
ENSG00000058262	29927	SEC61A1	-1.37492	9.40951	0.00215863	0.0143462	-1
ENSG00000132394	60678	EEFSEC	-1.33288	7.70158	0.00551724	0.0254745	-1
ENSG00000239405	NA	TMED10P2	-1.51766	7.89132	0.00496725	0.0239399	-1
ENSG00000177646	28976	ACAD9	-1.13474	5.93142	0.0148733	0.0455906	-1
ENSG00000172780	339122	RAB43	-1.75452	10.6341	0.00111021	0.0092308	-1
ENSG00000181789	22820	COPG1	-1.42191	9.9395	0.00161769	0.011925	-1
ENSG00000183624	56941	HMCES	-1.31806	7.96116	0.00477918	0.0234795	-1
ENSG00000253540	729375	FAM86HP	-1.73574	10.2305	0.00138138	0.0106366	-1
ENSG00000198585	131870	NUDT16	-1.29866	7.81049	0.00519437	0.0246048	-1
ENSG00000114686	11222	MRPL3	-1.08956	5.74493	0.0165363	0.0484508	-1
ENSG00000138246	23317	DNAJC13	-1.54967	11.4212	0.000726108	0.00690129	-1
ENSG00000129048	51554	ACKR4	-1.24828	7.35212	0.00669839	0.0286338	-1
ENSG00000081307	79876	UBA5	-1.31327	8.11011	0.0044019	0.0224025	-1
ENSG00000091527	55573	CDV3	-1.36375	9.10396	0.00255057	0.0159264	-1
ENSG00000163781	11073	TOPBP1	-1.49882	10.4067	0.00125562	0.00997078	-1
ENSG00000154917	51560	RAB6B	-1.24371	6.49482	0.010819	0.038083	-1
ENSG00000174640	6578	SLCO2A1	-2.06973	11.561	0.000673481	0.00653083	-1
ENSG00000114019	51421	AMOTL2	-2.05273	19.7793	8.69206e-06	0.00023575	-1
ENSG00000182923	80254	CEP63	-1.37876	8.45678	0.00363685	0.0199265	-1
ENSG00000114054	5096	PCCB	-1.69369	12.8797	0.000332158	0.00397051	-1
ENSG00000168917	80723	SLC35G2	-1.3856	8.42007	0.00371101	0.0201651	-1
ENSG00000174564	53833	IL20RB	-2.38851	20.0243	7.64658e-06	0.000211403	-1
ENSG00000158186	22808	MRAS	-1.21588	6.95866	0.00834144	0.0328294	-1
ENSG00000051382	5291	PIK3CB	-1.60857	11.3702	0.000746327	0.00700088	-1
ENSG00000184432	9276	COPB2	-1.26628	7.94937	0.00481042	0.0235887	-1
ENSG00000158258	64084	CLSTN2	-3.69167	39.9262	2.6374e-10	3.09619e-08	-1
ENSG00000175066	256356	GK5	-1.79103	13.3459	0.000258985	0.00330154	-1
ENSG00000175054	545	ATR	-1.25424	7.13354	0.00756551	0.0309527	-1
ENSG00000120756	5357	PLS1	-1.84521	10.7069	0.00106737	0.00896465	-1
ENSG00000152952	5352	PLOD2	-2.27789	23.8962	1.01675e-06	3.97228e-05	-1
ENSG00000174963	84107	ZIC4	-1.72281	8.57018	0.00341714	0.0191765	-1
ENSG00000152977	7545	ZIC1	-1.43679	7.67371	0.0056031	0.0257157	-1
ENSG00000144891	185	AGTR1	-1.36271	7.38464	0.00657832	0.0283478	-1
ENSG00000163751	1359	CPA3	-3.51283	34.2995	4.72509e-09	3.91212e-07	-1
ENSG00000163754	2992	GYG1	-1.70206	13.4951	0.000239191	0.00312517	-1
ENSG00000071794	6596	HLTF	-1.40934	9.17588	0.00245226	0.0155183	-1
ENSG00000163755	84343	HPS3	-1.80747	14.8901	0.000113962	0.00175586	-1
ENSG00000169908	4071	TM4SF1	-3.83843	53.9655	2.04039e-13	5.09482e-11	-1
ENSG00000114744	51122	COMMD2	-1.2075	6.8524	0.00885223	0.0339231	-1
ENSG00000070087	5217	PFN2	-1.54984	11.644	0.000644092	0.00636846	-1
ENSG00000198843	51714	SELENOT	-1.42714	9.65926	0.001884	0.0132128	-1
ENSG00000181788	6478	SIAH2	-1.16079	6.19992	0.0127756	0.0419043	-1
ENSG00000152601	4154	MBNL1	-1.08809	5.90523	0.015096	0.0460372	-1
ENSG00000229619	401093	MBNL1-AS1	-1.4787	9.85021	0.00169813	0.0123615	-1
ENSG00000181467	5912	RAP2B	-1.2182	7.06368	0.00786621	0.0316237	-1
ENSG00000169359	9197	SLC33A1	-1.24152	6.33048	0.011868	0.0403491	-1
ENSG00000114850	6747	SSR3	-1.86951	16.8059	4.14042e-05	0.000805104	-1
ENSG00000163661	5806	PTX3	-1.92407	17.4212	2.99462e-05	0.000627275	-1
ENSG00000174899	152078	SLC66A1L	-2.33591	15.8211	6.96204e-05	0.00119303	-1
ENSG00000286892	NA		-3.7594	30.2079	3.88134e-08	2.47326e-06	-1
ENSG00000168827	85476	GFM1	-1.14639	6.19915	0.0127812	0.0419138	-1
ENSG00000283154	29970,100505385	SCHIP1,IQCJ-SCHIP1	-1.44216	8.08342	0.00446719	0.0225708	-1
ENSG00000114209	11235	PDCD10	-1.38375	8.67588	0.00322449	0.0184319	-1
ENSG00000163536	5274	SERPINI1	-1.77466	7.02979	0.00801646	0.0320411	-1
ENSG00000173905	27333	GOLIM4	-1.09405	5.84541	0.0156178	0.0469841	-1
ENSG00000163558	5584	PRKCI	-1.10494	5.8939	0.0151934	0.0461939	-1
ENSG00000154310	23043	TNIK	-1.66424	10.8542	0.000985709	0.00846535	-1
ENSG00000279673	NA		-2.15165	7.64279	0.00569997	0.0259638	-1
ENSG00000075420	64778	FNDC3B	-1.31879	8.52384	0.00350525	0.0194022	-1
ENSG00000144959	57552	NCEH1	-2.764	31.1049	2.44448e-08	1.65751e-06	-1
ENSG00000114346	1894	ECT2	-1.96557	17.4915	2.88593e-05	0.000609588	-1
ENSG00000177565	79718	TBL1XR1	-1.22183	7.23414	0.00715302	0.0298235	-1
ENSG00000228221	100505566	LINC00578	-3.8703	24.6309	6.94289e-07	2.88176e-05	-1
ENSG00000231574	102724550	LINC02015	-5.11457	35.0277	3.2505e-09	2.79419e-07	-1
ENSG00000225790	NA		-6.31906	27.5529	1.52857e-07	8.15117e-06	-1
ENSG00000223930	NA		-3.87808	23.4726	1.26704e-06	4.77938e-05	-1
ENSG00000172667	64393	ZMAT3	-1.11288	5.9638	0.0146026	0.0450758	-1
ENSG00000171109	55669	MFN1	-1.17694	6.55816	0.0104404	0.0373269	-1
ENSG00000058056	8975	USP13	-1.29146	7.67276	0.00560607	0.0257186	-1
ENSG00000058063	23200	ATP11B	-1.23864	7.38439	0.00657924	0.0283478	-1
ENSG00000043093	54165	DCUN1D1	-1.27637	7.627	0.00575008	0.0261127	-1
ENSG00000240024	100505687	LINC00888	-1.51366	8.32321	0.00391417	0.0208446	-1
ENSG00000163872	55689	YEATS2	-1.57665	11.6736	0.000633925	0.00632626	-1
ENSG00000180834	79929	MAP6D1	-1.94064	9.7963	0.00174863	0.0125951	-1
ENSG00000161203	1173	AP2M1	-1.76863	15.199	9.67533e-05	0.00154364	-1
ENSG00000214160	10195	ALG3	-1.18161	6.42033	0.0112821	0.0390362	-1
ENSG00000175166	5708	PSMD2	-1.51507	11.1559	0.000837629	0.00755548	-1
ENSG00000114867	1981	EIF4G1	-1.38819	9.5848	0.00196194	0.0136022	-1
ENSG00000175182	131408	FAM131A	-1.43714	8.08941	0.00445247	0.0225287	-1
ENSG00000156931	23355	VPS8	-1.13764	5.96534	0.0145897	0.0450561	-1
ENSG00000187068	285382	C3orf70	-1.81436	7.84452	0.0050975	0.0243321	-1
ENSG00000113790	1962	EHHADH	-1.36653	7.02876	0.00802109	0.0320416	-1
ENSG00000163900	90407	TMEM41A	-1.33031	7.73144	0.00542674	0.0251972	-1
ENSG00000163898	200879	LIPH	-3.44003	17.109	3.52948e-05	0.000713655	-1
ENSG00000163918	5984	RFC4	-1.41492	8.12761	0.00435962	0.0222739	-1
ENSG00000163923	116832	RPL39L	-1.40211	7.98104	0.00472699	0.0233397	-1
ENSG00000145012	4026	LPP	-1.41377	9.76421	0.00177942	0.0127617	-1
ENSG00000090530	55214	P3H2	-2.90931	33.6162	6.71311e-09	5.30673e-07	-1
ENSG00000163347	9076	CLDN1	-3.74961	35.9918	1.98155e-09	1.79309e-07	-1
ENSG00000196083	3556	IL1RAP	-1.42192	9.09823	0.00255858	0.0159264	-1
ENSG00000233308	106480738	OSTN-AS1	-3.6639	29.3115	6.16286e-08	3.68623e-06	-1
ENSG00000188958	257313	UTS2B	-1.41961	6.41768	0.011299	0.0390732	-1
ENSG00000152492	152137	CCDC50	-1.2443	7.66594	0.0056273	0.0257634	-1
ENSG00000223812	NA	PYDC2-AS1	-2.51179	18.2085	1.97993e-05	0.000452051	-1
ENSG00000198836	4976	OPA1	-1.17096	6.61544	0.0101098	0.0366278	-1
ENSG00000133657	79572	ATP13A3	-1.25824	7.66403	0.00563327	0.0257832	-1
ENSG00000173950	152002	XXYLT1	-1.46158	9.7296	0.00181324	0.0128775	-1
ENSG00000114331	23527	ACAP2	-1.1365	6.24255	0.0124717	0.0414432	-1
ENSG00000184203	5504	PPP1R2	-1.33312	8.39657	0.00375931	0.0203362	-1
ENSG00000072274	7037	TFRC	-1.14804	6.54318	0.0105287	0.0375146	-1
ENSG00000161217	5130	PCYT1A	-1.45008	9.97456	0.00158718	0.0117829	-1
ENSG00000213123	255758	DYNLT2B	-1.44542	6.63994	0.00997175	0.0363536	-1
ENSG00000163964	54965	PIGX	-1.41062	8.75717	0.00308387	0.0179277	-1
ENSG00000075711	1739	DLG1	-1.57681	11.7696	0.000602059	0.0060953	-1
ENSG00000161267	622	BDH1	-1.49257	6.87584	0.00873686	0.0336779	-1
ENSG00000145016	9711	RUBCN	-1.30089	7.55898	0.00597119	0.0266928	-1
ENSG00000185619	10336	PCGF3	-1.11121	5.82835	0.0157699	0.0472168	-1
ENSG00000174137	152877	FAM53A	-1.42264	6.76091	0.00931763	0.0349331	-1
ENSG00000013810	10460	TACC3	-1.61944	12.0981	0.000504736	0.00537212	-1
ENSG00000068078	2261	FGFR3	-1.70042	7.82927	0.00514068	0.0244536	-1
ENSG00000168924	3954	LETM1	-1.13052	6.065	0.0137887	0.0437342	-1
ENSG00000109685	7468	NSD2	-1.53655	11.2249	0.00080705	0.00738552	-1
ENSG00000063978	6047	RNF4	-1.14713	6.3492	0.0117434	0.0400641	-1
ENSG00000168884	79155	TNIP2	-1.14711	6.05155	0.0138941	0.0438803	-1
ENSG00000087274	118	ADD1	-1.16896	6.80971	0.00906636	0.0343752	-1
ENSG00000197386	3064	HTT	-1.34566	8.6224	0.00332055	0.0188576	-1
ENSG00000072840	2121	EVC	-1.16348	6.59766	0.0102113	0.0368933	-1
ENSG00000109501	7466	WFS1	-2.43824	26.4589	2.69205e-07	1.30304e-05	-1
ENSG00000173013	257236	CCDC96	-1.27002	5.75351	0.0164557	0.048309	-1
ENSG00000109519	80273	GRPEL1	-1.18852	6.51615	0.0106899	0.0378235	-1
ENSG00000272620	84740	AFAP1-AS1	-1.49747	6.53728	0.0105637	0.037566	-1
ENSG00000196526	60312	AFAP1	-1.40274	9.64965	0.00189387	0.0132647	-1
ENSG00000155269	27201	GPR78	-1.97354	9.411	0.00215687	0.0143406	-1
ENSG00000071127	9948	WDR1	-1.61962	12.8859	0.000331069	0.00396429	-1
ENSG00000248698	152742	LINC01085	-1.7049	11.7463	0.000609639	0.00615153	-1
ENSG00000251679	NA		-1.60022	5.80849	0.015949	0.0475356	-1
ENSG00000137449	132864	CPEB2	-1.50356	10.0305	0.00153969	0.0114954	-1
ENSG00000118564	26234	FBXL5	-1.21121	7.00864	0.00811175	0.0322426	-1
ENSG00000109805	64151	NCAPG	-1.85899	15.3191	9.07959e-05	0.00146741	-1
ENSG00000178177	254251	LCORL	-1.33754	7.51592	0.00611562	0.0270618	-1
ENSG00000038210	55300	PI4K2B	-1.93812	16.6907	4.39966e-05	0.000845027	-1
ENSG00000091490	23231	SEL1L3	-3.36641	37.0048	1.17839e-09	1.12347e-07	-1
ENSG00000109680	55296	TBC1D19	-1.50364	9.25797	0.00234473	0.0150735	-1
ENSG00000109689	57620	STIM2	-1.16802	5.89146	0.0152145	0.0462388	-1
ENSG00000169299	55276	PGM2	-1.72413	12.9257	0.0003241	0.00390983	-1
ENSG00000249863	NA		-1.56441	5.99274	0.0143649	0.0446938	-1
ENSG00000065882	23216	TBC1D1	-1.99525	18.068	2.13156e-05	0.000481775	-1
ENSG00000197712	92689	FAM114A1	-1.31505	8.50728	0.00353728	0.0195315	-1
ENSG00000121895	80008	TMEM156	-5.29899	16.5017	4.8607e-05	0.000904895	-1
ENSG00000109790	51088	KLHL5	-2.11834	20.6064	5.64073e-06	0.000166169	-1
ENSG00000249685	NA		-2.6205	16.332	5.31584e-05	0.000971237	-1
ENSG00000035928	5981	RFC1	-1.25766	7.55908	0.00597085	0.0266928	-1
ENSG00000078140	3093	UBE2K	-1.19697	6.89486	0.00864441	0.0334609	-1
ENSG00000121892	23244	PDS5A	-1.07783	5.6485	0.0174703	0.0499199	-1
ENSG00000163694	54502	RBM47	-2.33853	15.2195	9.57106e-05	0.00152855	-1
ENSG00000163697	323	APBB2	-1.37599	8.96287	0.00275521	0.0166765	-1
ENSG00000154277	7345	UCHL1	-2.00432	18.9744	1.32481e-05	0.000328199	-1
ENSG00000064042	22998	LIMCH1	-2.15774	21.3806	3.76558e-06	0.000120399	-1
ENSG00000109133	55161	TMEM33	-1.09005	5.66444	0.0173122	0.0497149	-1
ENSG00000014824	10463	SLC30A9	-1.29624	7.98297	0.00472195	0.0233397	-1
ENSG00000251350	100506827	LINC02475	-1.47654	6.94749	0.00839371	0.0329326	-1
ENSG00000151806	60558	GUF1	-1.35378	8.27882	0.00401102	0.0212306	-1
ENSG00000163281	132789	GNPDA2	-1.27308	7.31871	0.00682404	0.0289204	-1
ENSG00000169019	54951	COMMD8	-1.82495	13.6995	0.000214511	0.00286625	-1
ENSG00000145246	57205	ATP10D	-1.42516	9.46435	0.00209504	0.0141386	-1
ENSG00000145244	10699	CORIN	-1.58319	11.6023	0.000658691	0.00644395	-1
ENSG00000170448	152518	NFXL1	-1.3263	7.34656	0.0067191	0.028699	-1
ENSG00000163293	152519	NIPAL1	-2.04563	15.095	0.000102233	0.00160662	-1
ENSG00000135605	7006	TEC	-1.65049	9.1036	0.00255108	0.0159264	-1
ENSG00000109171	57606	SLAIN2	-1.07972	5.65163	0.0174391	0.0498938	-1
ENSG00000075539	285527	FRYL	-2.06198	19.1354	1.21766e-05	0.00030599	-1
ENSG00000145247	132299	OCIAD2	-2.21035	16.6665	4.45608e-05	0.000851014	-1
ENSG00000109184	23142	DCUN1D4	-1.36527	8.70578	0.00317203	0.0182121	-1
ENSG00000163069	6443	SGCB	-1.10646	5.9799	0.0144698	0.0448257	-1
ENSG00000128039	79644	SRD5A3	-1.44675	8.08632	0.00446007	0.0225599	-1
ENSG00000134851	55858	TMEM165	-1.23533	7.34174	0.00673715	0.028737	-1
ENSG00000134852	9575	CLOCK	-1.674	13.006	0.0003105	0.00379524	-1
ENSG00000157426	132949	AASDH	-1.26817	6.36871	0.011615	0.0397849	-1
ENSG00000128050	10606	PAICS	-1.31603	8.3456	0.00386622	0.020677	-1
ENSG00000174780	6731	SRP72	-1.1542	6.5124	0.0107125	0.0378523	-1
ENSG00000163453	3490	IGFBP7	-1.42164	10.1247	0.00146294	0.0110749	-1
ENSG00000245067	255130	IGFBP7-AS1	-1.18115	5.68868	0.0170747	0.0493079	-1
ENSG00000145242	2044	EPHA5	-1.96411	16.93	3.87842e-05	0.000765513	-1
ENSG00000250846	100144602	EPHA5-AS1	-1.51708	6.91644	0.00854066	0.0332557	-1
ENSG00000033178	55236	UBA6	-1.19963	6.8413	0.00890739	0.034002	-1
ENSG00000248049	550112	UBA6-DT	-1.31406	6.79458	0.00914352	0.0345346	-1
ENSG00000132465	3512	JCHAIN	-2.76513	22.5204	2.07925e-06	7.23643e-05	-1
ENSG00000132463	2926	GRSF1	-1.42809	9.71751	0.00182521	0.0129276	-1
ENSG00000173542	92597	MOB1B	-1.21874	6.95357	0.0083652	0.03289	-1
ENSG00000156136	1633	DCK	-1.77146	13.2622	0.00027081	0.00342656	-1
ENSG00000080493	8671	SLC4A4	-2.76418	27.4462	1.61524e-07	8.48956e-06	-1
ENSG00000156140	9508	ADAMTS3	-1.66148	7.88846	0.00497511	0.0239631	-1
ENSG00000132466	26057	ANKRD17	-1.17422	6.67161	0.00979605	0.0359902	-1
ENSG00000169429	3576	CXCL8	-5.99416	105.059	1.18565e-24	5.99861e-21	-1
ENSG00000124875	6372	CXCL6	-2.28764	13.7	0.000214458	0.00286625	-1
ENSG00000163739	2919	CXCL1	-4.60091	59.6039	1.16003e-14	3.96706e-12	-1
ENSG00000163734	2921	CXCL3	-3.59512	32.5231	1.17786e-08	8.65837e-07	-1
ENSG00000081041	2920	CXCL2	-3.02955	23.6723	1.14213e-06	4.3609e-05	-1
ENSG00000138769	8999	CDKL2	-2.97525	19.0747	1.25702e-05	0.000313875	-1
ENSG00000138757	9908	G3BP2	-1.42356	9.82148	0.00172486	0.012481	-1
ENSG00000138768	8615	USO1	-1.47604	10.4109	0.00125277	0.0099532	-1
ENSG00000138744	27163	NAAA	-1.29928	6.64227	0.0099587	0.0363355	-1
ENSG00000118804	8987	STBD1	-1.8046	10.8482	0.000988902	0.00848686	-1
ENSG00000138771	57619	SHROOM3	-1.77427	14.986	0.000108309	0.00168527	-1
ENSG00000118816	10983	CCNI	-1.1015	6.01953	0.0141484	0.0442923	-1
ENSG00000138759	80144	FRAS1	-3.9907	52.2152	4.97404e-13	1.13401e-10	-1
ENSG00000138772	306	ANXA3	-4.19498	24.704	6.68462e-07	2.7967e-05	-1
ENSG00000251442	NA	LINC01094	-2.25521	15.4874	8.30573e-05	0.00136671	-1
ENSG00000138756	55589	BMP2K	-2.36755	24.8463	6.20897e-07	2.65416e-05	-1
ENSG00000163291	152559	PAQR3	-1.77991	13.1763	0.000283515	0.00353405	-1
ENSG00000138675	2250	FGF5	-2.01832	18.8983	1.37873e-05	0.00034102	-1
ENSG00000145293	58478	ENOPH1	-1.17508	6.18334	0.0128959	0.0421231	-1
ENSG00000138674	22872	SEC31A	-1.23127	7.56322	0.00595715	0.0266536	-1
ENSG00000251022	100499177	THAP9-AS1	-1.20683	6.35713	0.0116911	0.0399462	-1
ENSG00000168152	79725	THAP9	-1.28595	6.0335	0.0140369	0.0441039	-1
ENSG00000189308	132660	LIN54	-1.43587	9.15871	0.00247537	0.0156072	-1
ENSG00000138663	51138	COPS4	-1.50472	10.5859	0.00113951	0.00934848	-1
ENSG00000145287	51316	PLAC8	-4.10779	36.492	1.53295e-09	1.42692e-07	-1
ENSG00000173085	27235	COQ2	-1.15934	5.64932	0.0174622	0.0499199	-1
ENSG00000173083	10855	HPSE	-1.59166	9.3438	0.00223741	0.0146443	-1
ENSG00000138678	84803	GPAT3	-2.57927	20.0726	7.4558e-06	0.000207221	-1
ENSG00000284968	NA		-1.71281	8.45441	0.0036416	0.0199297	-1
ENSG00000172493	4299	AFF1	-1.6704	12.8674	0.000334348	0.00398759	-1
ENSG00000118762	5311	PKD2	-2.62179	30.6331	3.11738e-08	2.06032e-06	-1
ENSG00000163644	152926	PPM1K	-2.03098	16.4728	4.93525e-05	0.000916605	-1
ENSG00000177432	266812	NAP1L5	-1.42866	8.00347	0.00466879	0.0231687	-1
ENSG00000180346	166815	TIGD2	-2.0004	15.285	9.24469e-05	0.00149004	-1
ENSG00000187653	NA	TMSB4XP8	-1.53181	7.99119	0.00470054	0.0232749	-1
ENSG00000163110	10611	PDLIM5	-1.97302	18.1325	2.06051e-05	0.000467733	-1
ENSG00000138698	5910	RAP1GDS1	-1.89442	16.4385	5.02547e-05	0.000928974	-1
ENSG00000151247	1977	EIF4E	-1.23965	6.95656	0.00835124	0.0328587	-1
ENSG00000164024	23173	METAP1	-1.58619	11.6501	0.000641979	0.00635567	-1
ENSG00000197894	128	ADH5	-1.10019	5.93921	0.0148077	0.0454605	-1
ENSG00000145331	93587	TRMT10A	-1.25945	5.83833	0.0156807	0.0470418	-1
ENSG00000248713	285556	C4orf54	-5.23801	29.2816	6.25862e-08	3.72933e-06	-1
ENSG00000070190	27071	DAPP1	-5.50331	32.6825	1.0851e-08	8.07419e-07	-1
ENSG00000164031	79982	DNAJB14	-1.14372	6.1733	0.0129693	0.0422727	-1
ENSG00000164032	3015	H2AZ1	-1.4513	10.1234	0.00146398	0.0110774	-1
ENSG00000145358	115265	DDIT4L	-3.15039	24.4596	7.58841e-07	3.10868e-05	-1
ENSG00000138821	64116	SLC39A8	-1.74208	12.1188	0.000499148	0.0053368	-1
ENSG00000145354	493856	CISD2	-1.33327	7.86195	0.00504859	0.0242058	-1
ENSG00000138778	1062	CENPE	-1.90527	15.8234	6.95385e-05	0.00119292	-1
ENSG00000138780	79807	GSTCD	-1.41468	7.91342	0.00490694	0.0237511	-1
ENSG00000145348	93627	TBCK	-1.3403	7.97434	0.00474452	0.0233946	-1
ENSG00000155011	27123	DKK2	-1.40902	5.69057	0.0170563	0.0492768	-1
ENSG00000164023	166929	SGMS2	-1.94175	16.9468	3.84429e-05	0.000761643	-1
ENSG00000155016	113612	CYP2U1	-1.36358	8.5259	0.00350128	0.0193955	-1
ENSG00000198856	58505	OSTC	-1.17734	6.70567	0.00961066	0.0355563	-1
ENSG00000138794	839	CASP6	-1.2378	6.0617	0.0138144	0.0437694	-1
ENSG00000123739	81579	PLA2G12A	-1.30042	7.63781	0.00571571	0.0260089	-1
ENSG00000138798	1950	EGF	-2.39719	17.3523	3.10521e-05	0.00064105	-1
ENSG00000170522	79071	ELOVL6	-1.7039	12.0456	0.000519145	0.00549944	-1
ENSG00000138660	55435	AP1AR	-1.60313	11.7284	0.000615532	0.00619508	-1
ENSG00000145365	92610	TIFA	-1.58058	10.2282	0.00138307	0.0106392	-1
ENSG00000138658	55345	ZGRF1	-1.40617	7.40651	0.00649884	0.0280938	-1
ENSG00000145349	817	CAMK2D	-1.40602	9.39844	0.0021717	0.0143966	-1
ENSG00000164099	8492	PRSS12	-1.21604	7.41031	0.00648512	0.0280576	-1
ENSG00000150961	9871	SEC24D	-1.50336	11.0224	0.000900193	0.00797799	-1
ENSG00000172403	171024	SYNPO2	-2.42162	27.4734	1.59271e-07	8.40767e-06	-1
ENSG00000172399	51778	MYOZ2	-3.63753	23.8917	1.01911e-06	3.97228e-05	-1
ENSG00000145390	54532	USP53	-2.42804	27.0906	1.94139e-07	9.91556e-06	-1
ENSG00000245958	NA	SEPTIN7P14	-1.41622	7.42066	0.0064479	0.0279957	-1
ENSG00000138735	8654	PDE5A	-1.15204	6.60211	0.0101858	0.0368267	-1
ENSG00000164109	4085	MAD2L1	-1.97252	16.6357	4.52914e-05	0.000859445	-1
ENSG00000145386	890	CCNA2	-2.08475	19.0845	1.25057e-05	0.000312763	-1
ENSG00000138688	84162	BLTP1	-1.092	5.76565	0.0163424	0.0481781	-1
ENSG00000227145	100996941	IL21-AS1	-3.51867	28.7099	8.40736e-08	4.86236e-06	-1
ENSG00000164070	22824	HSPA4L	-2.14651	16.3507	5.26355e-05	0.000963921	-1
ENSG00000142731	10733	PLK4	-1.8068	13.006	0.000310495	0.00379524	-1
ENSG00000164073	256471	MFSD8	-1.22374	6.09599	0.0135489	0.0433118	-1
ENSG00000164074	80167	ABHD18	-1.5733	9.4887	0.00206741	0.0140607	-1
ENSG00000151470	132321	C4orf33	-1.32895	6.54814	0.0104994	0.0374356	-1
ENSG00000250241	101927359	PCDH10-DT	-1.93471	13.3682	0.000255922	0.00327576	-1
ENSG00000138650	57575	PCDH10	-1.40156	9.7682	0.00177556	0.01275	-1
ENSG00000151012	23657	SLC7A11	-2.64197	30.6602	3.07408e-08	2.04044e-06	-1
ENSG00000109390	4717	NDUFC1	-1.3391	8.11304	0.00439479	0.0223881	-1
ENSG00000164134	80155	NAA15	-1.09127	5.72422	0.0167325	0.0487441	-1
ENSG00000172007	83452	RAB33B	-1.37599	7.95913	0.00478454	0.0234985	-1
ENSG00000145391	80854,105377622	SETD7,LOC105377622	-1.37823	9.19816	0.00242259	0.0153996	-1
ENSG00000153130	60592	SCOC	-1.59802	11.8077	0.000589875	0.00601382	-1
ENSG00000179387	255520	ELMOD2	-1.63389	11.9556	0.00054482	0.0057061	-1
ENSG00000170153	57484	RNF150	-2.06347	19.66	9.25199e-06	0.00024585	-1
ENSG00000109452	8821	INPP4B	-1.55136	11.4836	0.000702132	0.0067349	-1
ENSG00000109458	2549	GAB1	-1.48051	9.51448	0.00203856	0.013949	-1
ENSG00000164168	55751	TMEM184C	-1.23781	7.19363	0.0073163	0.0302875	-1
ENSG00000170390	166614	DCLK2	-2.1276	20.6126	5.62239e-06	0.000166122	-1
ENSG00000164142	729830	FHIP1A	-2.30758	15.0011	0.00010745	0.00167687	-1
ENSG00000170006	201799	TMEM154	-1.95643	13.9879	0.000183993	0.00255013	-1
ENSG00000137460	85462	FHDC1	-1.22332	6.00105	0.0142974	0.0445811	-1
ENSG00000121210	23240	TMEM131L	-2.11039	17.6128	2.70767e-05	0.000579721	-1
ENSG00000185149	4887	NPY2R	-2.10343	10.3627	0.00128585	0.0100924	-1
ENSG00000164114	79884	MAP9	-1.96775	16.0333	6.22396e-05	0.00109396	-1
ENSG00000164116	2982	GUCY1A1	-2.88767	29.6943	5.05842e-08	3.10836e-06	-1
ENSG00000061918	2983	GUCY1B1	-1.60896	10.6758	0.00108548	0.00907801	-1
ENSG00000164125	51313	GASK1B	-2.32426	20.1924	7.00322e-06	0.000197787	-1
ENSG00000164124	55314	TMEM144	-1.6758	8.66653	0.00324107	0.0185064	-1
ENSG00000171509	59350	RXFP1	-3.1861	17.832	2.41288e-05	0.00053161	-1
ENSG00000205208	201725	C4orf46	-1.33406	7.7692	0.00531447	0.0248964	-1
ENSG00000171497	5481	PPID	-1.17096	6.24704	0.0124401	0.0413645	-1
ENSG00000052795	57600	FNIP2	-2.09687	19.1806	1.18914e-05	0.000300745	-1
ENSG00000109756	9693	RAPGEF2	-1.11303	5.82122	0.0158339	0.0473633	-1
ENSG00000052802	6307	MSMO1	-1.1892	6.71159	0.00957882	0.0354681	-1
ENSG00000038295	7092	TLL1	-2.44346	19.185	1.18644e-05	0.000300546	-1
ENSG00000145439	84869	CBR4	-1.1752	5.68171	0.0171427	0.0494447	-1
ENSG00000154447	57630	SH3RF1	-1.19417	6.70045	0.00963887	0.0356104	-1
ENSG00000164104	3148	HMGB2	-1.18581	6.71969	0.00953544	0.0354045	-1
ENSG00000164105	8819	SAP30	-1.3533	7.34939	0.00670855	0.0286694	-1
ENSG00000129128	60559	SPCS3	-1.98752	18.5774	1.6314e-05	0.000388842	-1
ENSG00000287544	NA		-3.14025	12.2206	0.000472638	0.00514536	-1
ENSG00000109674	55247	NEIL3	-2.06691	16.2357	5.59314e-05	0.00100785	-1
ENSG00000038002	175	AGA	-1.86173	16.0688	6.10807e-05	0.00107841	-1
ENSG00000250131	NA	AGA-DT	-2.28228	12.7487	0.000356253	0.00417913	-1
ENSG00000177822	NA	TENM3-AS1	-1.92011	11.1573	0.000836998	0.00755411	-1
ENSG00000218336	55714	TENM3	-1.83432	14.5922	0.000133469	0.00196961	-1
ENSG00000151718	80014	WWC2	-1.59876	12.0441	0.000519574	0.00550028	-1
ENSG00000168556	3622	ING2	-1.44706	8.33638	0.0038859	0.0207428	-1
ENSG00000182552	201965	RWDD4	-1.27561	6.76001	0.0093223	0.0349331	-1
ENSG00000168310	3660	IRF2	-1.11838	5.6596	0.0173601	0.0497867	-1
ENSG00000164305	836	CASP3	-1.41615	9.39636	0.00217416	0.0143996	-1
ENSG00000151725	79682	CENPU	-1.92008	14.5023	0.000139989	0.00204472	-1
ENSG00000151726	2180	ACSL1	-1.13915	5.83968	0.0156687	0.04703	-1
ENSG00000151729	291	SLC25A4	-2.47175	19.0081	1.30167e-05	0.000322973	-1
ENSG00000164323	57587	CFAP97	-1.17451	6.61274	0.0101252	0.0366664	-1
ENSG00000109762	83891	SNX25	-1.16998	6.25297	0.0123985	0.041317	-1
ENSG00000186352	353322	ANKRD37	-1.29922	6.42014	0.0112833	0.0390362	-1
ENSG00000109775	55325	UFSP2	-1.15152	5.92451	0.0149317	0.0457002	-1
ENSG00000154556	8470	SORBS2	-5.60708	34.0663	5.32668e-09	4.29713e-07	-1
ENSG00000083857	2195	FAT1	-2.28796	24.813	6.31699e-07	2.69302e-05	-1
ENSG00000179046	205860	TRIML2	-2.54793	11.5153	0.00069024	0.00664108	-1
ENSG00000153404	153478	PLEKHG4B	-1.96995	11.2124	0.00081251	0.00740962	-1
ENSG00000221990	NA	EXOC3-AS1	-1.47297	7.42452	0.0064341	0.0279593	-1
ENSG00000071539	9319	TRIP13	-1.93455	15.7464	7.2424e-05	0.00122506	-1
ENSG00000049656	81037	CLPTM1L	-1.16003	6.49622	0.0108104	0.0380741	-1
ENSG00000153395	79888	LPCAT1	-1.1788	6.55412	0.0104642	0.0373863	-1
ENSG00000145494	4726	NDUFS6	-1.12834	5.8945	0.0151882	0.0461871	-1
ENSG00000145545	6715	SRD5A1	-1.74214	12.6447	0.000376634	0.0043629	-1
ENSG00000150753	22948	CCT5	-1.1956	6.98952	0.00819885	0.0325041	-1
ENSG00000145495	10299	MARCHF6	-1.11615	6.12131	0.0133562	0.0430181	-1
ENSG00000112977	1611	DAP	-1.36824	9.2127	0.00240342	0.0153276	-1
ENSG00000272324	NA	DAP-DT	-1.66509	6.79532	0.00913971	0.0345342	-1
ENSG00000039139	1767	DNAH5	-2.25474	18.7001	1.52971e-05	0.000368513	-1
ENSG00000038382	7204	TRIO	-1.53694	11.4561	0.000712583	0.0068061	-1
ENSG00000145555	4651	MYO10	-1.20125	7.07531	0.00781531	0.0315019	-1
ENSG00000176788	10409	BASP1	-1.09817	5.81814	0.0158617	0.0473924	-1
ENSG00000145526	1016	CDH18	-1.65549	8.71662	0.00315323	0.0181498	-1
ENSG00000113360	29102	DROSHA	-1.1876	6.68838	0.00970434	0.0357766	-1
ENSG00000082213	55322	C5orf22	-1.28715	7.51104	0.00613219	0.0271275	-1
ENSG00000272086	NA	GOLPH3-DT	-1.38396	6.11494	0.0134044	0.0430775	-1
ENSG00000150712	54545	MTMR12	-1.17898	6.38857	0.0114858	0.0394848	-1
ENSG00000113389	4883	NPR3	-1.21622	6.37059	0.0116027	0.0397651	-1
ENSG00000151388	81792	ADAMTS12	-1.85421	15.7738	7.13824e-05	0.00121396	-1
ENSG00000242110	23600	AMACR	-1.33874	6.07614	0.013702	0.0436141	-1
ENSG00000113456	5810	RAD1	-1.65603	12.6389	0.000377803	0.00437323	-1
ENSG00000113494	5618	PRLR	-1.68561	7.69393	0.00554069	0.0255154	-1
ENSG00000168685	3575	IL7R	-3.94159	59.8782	1.00912e-14	3.52767e-12	-1
ENSG00000152611	133690	CAPSL	-3.86992	20.3938	6.30321e-06	0.000180612	-1
ENSG00000164187	92255	LMBRD2	-1.5484	10.4552	0.00122308	0.00980644	-1
ENSG00000145604	6502	SKP2	-2.58154	28.8261	7.91789e-08	4.59617e-06	-1
ENSG00000197603	65250	CPLANE1	-1.44199	9.4748	0.00208314	0.0140954	-1
ENSG00000113569	9631	NUP155	-1.17414	6.48356	0.0108877	0.0382394	-1
ENSG00000145623	9180	OSMR	-1.59592	12.0804	0.000509533	0.00541952	-1
ENSG00000164327	253260	RICTOR	-1.11763	5.91034	0.0150523	0.0459871	-1
ENSG00000153071	1601	DAB2	-1.15985	6.69431	0.00967213	0.0356969	-1
ENSG00000182836	345557	PLCXD3	-1.2797	6.18533	0.0128813	0.042119	-1
ENSG00000083720	5019	OXCT1	-1.868	15.4966	8.26542e-05	0.0013615	-1
ENSG00000205765	285636	RIMOC1	-1.35481	8.59137	0.00337761	0.0190769	-1
ENSG00000172244	375444	C5orf34	-1.52383	8.25317	0.00406808	0.0214245	-1
ENSG00000112992	23530	NNT	-1.67322	13.0846	0.000297727	0.00367914	-1
ENSG00000151883	79668	PARP8	-1.18396	6.25658	0.0123733	0.0412855	-1
ENSG00000213949	3672	ITGA1	-2.02216	19.1707	1.19533e-05	0.000301343	-1
ENSG00000152684	53918	PELO	-1.2447	7.33028	0.00678027	0.028796	-1
ENSG00000164171	3673	ITGA2	-1.20847	7.02743	0.00802703	0.0320572	-1
ENSG00000164172	4338	MOCS2	-1.12321	5.90368	0.0151093	0.0460379	-1
ENSG00000169271	8988	HSPB3	-3.5581	42.853	5.90104e-11	8.21498e-09	-1
ENSG00000178996	112574	SNX18	-1.80059	15.188	9.73198e-05	0.00154953	-1
ENSG00000164283	11082	ESM1	-1.42999	7.95246	0.0048022	0.0235558	-1
ENSG00000164294	493869	GPX8	-1.14734	6.48376	0.0108865	0.0382394	-1
ENSG00000067248	54505	DHX29	-1.14145	6.22995	0.0125607	0.0415985	-1
ENSG00000067113	8611	PLPP1	-1.13968	6.18357	0.0128942	0.0421231	-1
ENSG00000248727	102467147	LINC01948	-1.80866	8.28994	0.00398653	0.0211437	-1
ENSG00000095015	4214	MAP3K1	-1.49133	9.01935	0.00267136	0.0163324	-1
ENSG00000035499	55789	DEPDC1B	-2.2286	17.1424	3.46792e-05	0.000702109	-1
ENSG00000068796	3796	KIF2A	-1.51456	10.7366	0.00105035	0.0088834	-1
ENSG00000086200	51194,101180901	IPO11,IPO11-LRRC70	-1.43332	9.25334	0.00235066	0.0150993	-1
ENSG00000049192	11174	ADAMTS6	-1.32504	7.71474	0.00547717	0.0253416	-1
ENSG00000123219	64105	CENPK	-1.71431	11.2138	0.000811917	0.00740851	-1
ENSG00000113597	80006	TRAPPC13	-1.27491	6.82073	0.00901058	0.0342463	-1
ENSG00000197860	54557	SGTB	-1.61637	11.6995	0.000625168	0.00626714	-1
ENSG00000123213	57486	NLN	-1.56359	11.0638	0.000880285	0.00785021	-1
ENSG00000112851	55914	ERBIN	-1.07965	5.71881	0.0167841	0.0488313	-1
ENSG00000145675	5295	PIK3R1	-1.62228	12.3683	0.000436695	0.00483778	-1
ENSG00000134057	891	CCNB1	-1.77674	14.2956	0.000156233	0.00223428	-1
ENSG00000280187	NA		-1.4469	6.59404	0.0102321	0.0369346	-1
ENSG00000153044	64946	CENPH	-1.62111	10.7088	0.00106628	0.00896032	-1
ENSG00000183323	202243	CCDC125	-1.56868	9.30215	0.00228885	0.0148662	-1
ENSG00000273841	6880	TAF9	-1.30126	7.92609	0.00487269	0.0236993	-1
ENSG00000197822	100506658	OCLN	-1.66221	7.91444	0.00490419	0.0237451	-1
ENSG00000131844	64087	MCCC2	-1.29009	7.66871	0.00561865	0.0257538	-1
ENSG00000131711	4131	MAP1B	-1.11146	5.98543	0.0144245	0.0447749	-1
ENSG00000049883	79810	PTCD2	-1.38084	7.73965	0.00540212	0.0251423	-1
ENSG00000083312	3842	TNPO1	-1.43614	10.0442	0.00152828	0.0114428	-1
ENSG00000157111	134285	TMEM171	-1.9556	13.41	0.000250288	0.00322992	-1
ENSG00000214944	64283	ARHGEF28	-1.82092	14.3851	0.000148976	0.00214217	-1
ENSG00000164347	84340	GFM2	-1.76995	13.735	0.000210493	0.00282531	-1
ENSG00000198780	26049	FAM169A	-2.0187	15.4183	8.61496e-05	0.00141169	-1
ENSG00000176928	51301	GCNT4	-2.92154	35.2028	2.97104e-09	2.58217e-07	-1
ENSG00000164253	55255	WDR41	-1.41437	9.56696	0.0019811	0.0136628	-1
ENSG00000213763	NA	ACTBP2	-1.74435	6.55469	0.0104608	0.0373829	-1
ENSG00000132842	8546	AP3B1	-1.45016	10.045	0.00152766	0.0114428	-1
ENSG00000085365	9522	SCAMP1	-1.12969	6.11795	0.0133816	0.0430504	-1
ENSG00000113273	411	ARSB	-1.50883	10.3678	0.00128233	0.0100924	-1
ENSG00000132837	29958	DMGDH	-1.39505	6.45186	0.0110836	0.0386858	-1
ENSG00000132840	23743	BHMT2	-1.50387	8.09605	0.00443619	0.022497	-1
ENSG00000039319	9765	ZFYVE16	-1.22974	7.09436	0.00773271	0.0313049	-1
ENSG00000249042	NA	FAM151B-DT	-1.34195	7.36722	0.00664234	0.0284926	-1
ENSG00000228716	1719	DHFR	-1.69433	12.1633	0.000487398	0.00525433	-1
ENSG00000113318	4437	MSH3	-1.32148	7.70432	0.00550889	0.0254509	-1
ENSG00000174695	153339	TMEM167A	-1.08576	5.73772	0.0166043	0.0485598	-1
ENSG00000152422	7518	XRCC4	-1.26422	6.32106	0.0119312	0.0404591	-1
ENSG00000145715	5921	RASA1	-1.10348	5.80239	0.0160044	0.0476648	-1
ENSG00000176055	153364	MBLAC2	-1.42573	8.10538	0.0044134	0.0224248	-1
ENSG00000113356	10622	POLR3G	-1.98907	13.4022	0.000251325	0.0032327	-1
ENSG00000176018	116068	LYSMD3	-1.45018	9.74167	0.00180137	0.0128165	-1
ENSG00000248323	100505994	LUCAT1	-2.23962	11.2996	0.00077523	0.00719903	-1
ENSG00000281357	100129716	ARRDC3-AS1	-3.24509	20.0993	7.35233e-06	0.000204707	-1
ENSG00000237187	441094	NR2F1-AS1	-1.26815	6.93109	0.00847099	0.0330745	-1
ENSG00000133302	84250	SLF1	-1.71092	11.2725	0.000786638	0.00726209	-1
ENSG00000175471	79772	MCTP1	-1.61613	6.42749	0.0112368	0.038978	-1
ENSG00000198677	9652	SKIC3	-1.53881	11.2782	0.00078421	0.00724818	-1
ENSG00000164291	153642	ARSK	-1.44215	9.00615	0.00269073	0.016403	-1
ENSG00000178015	285601	GPR150	-2.4743	10.9689	0.000926562	0.00812925	-1
ENSG00000145757	83890	SPATA9	-1.86807	7.21136	0.00724438	0.0300726	-1
ENSG00000164292	22836	RHOBTB3	-1.81548	15.8578	6.82851e-05	0.00117784	-1
ENSG00000173221	2745	GLRX	-1.79073	14.9786	0.000108736	0.00169025	-1
ENSG00000118985	22936	ELL2	-1.82985	15.7407	7.2646e-05	0.00122749	-1
ENSG00000174136	285704	RGMB	-1.40483	9.74872	0.00179448	0.0127988	-1
ENSG00000145725	23262	PPIP5K2	-1.31367	8.12765	0.00435952	0.0222739	-1
ENSG00000181751	90355	MACIR	-3.17226	42.2038	8.22406e-11	1.08717e-08	-1
ENSG00000112874	83594	NUDT12	-1.22363	5.99885	0.0143152	0.0446102	-1
ENSG00000145743	64839	FBXL17	-1.26708	7.4277	0.00642272	0.0279478	-1
ENSG00000151422	2241	FER	-1.44338	9.63009	0.00191415	0.0133651	-1
ENSG00000164209	91137	SLC25A46	-1.30495	8.08565	0.00446171	0.0225609	-1
ENSG00000152495	814	CAMK4	-1.19741	5.80738	0.0159591	0.0475568	-1
ENSG00000164211	134429	STARD4	-1.13198	5.88148	0.015301	0.0463686	-1
ENSG00000134982	324	APC	-1.69956	13.3639	0.000256509	0.0032806	-1
ENSG00000172795	167227	DCP2	-1.13971	5.87251	0.0153791	0.0465324	-1
ENSG00000080709	3781	KCNN2	-4.59937	69.1635	9.0631e-17	4.91626e-14	-1
ENSG00000152503	55521	TRIM36	-1.94427	11.6537	0.000640741	0.00635567	-1
ENSG00000164219	5229	PGGT1B	-1.27323	7.27616	0.00698757	0.0293437	-1
ENSG00000164221	153733	CCDC112	-1.3454	7.10034	0.00770691	0.0312629	-1
ENSG00000145780	56929	FEM1C	-1.23455	6.951	0.00837725	0.0329218	-1
ENSG00000134970	51014	TMED7	-1.34393	8.67884	0.00321926	0.018422	-1
ENSG00000145781	51397	COMMD10	-1.21429	6.40592	0.011374	0.0392465	-1
ENSG00000169570	285605	DTWD2	-2.6033	24.5351	7.29672e-07	3.02065e-05	-1
ENSG00000172869	1657	DMXL1	-1.41062	9.24039	0.00236734	0.0151648	-1
ENSG00000145779	25816	TNFAIP8	-1.55292	10.3064	0.00132572	0.0102936	-1
ENSG00000113083	4015	LOX	-1.76586	15.3644	8.86443e-05	0.00144314	-1
ENSG00000064652	28966	SNX24	-1.51977	9.17578	0.00245238	0.0155183	-1
ENSG00000155324	65983	GRAMD2B	-2.01809	18.7468	1.49277e-05	0.000362388	-1
ENSG00000279118	NA		-2.06756	16.7929	4.16895e-05	0.000808653	-1
ENSG00000113368	4001	LMNB1	-1.70478	13.254	0.000271996	0.00343013	-1
ENSG00000164241	401207	C5orf63	-1.55998	7.0543	0.00790752	0.0317491	-1
ENSG00000164244	133619	PRRC1	-1.14294	6.36624	0.0116312	0.0398193	-1
ENSG00000064651	6558	SLC12A2	-1.84909	14.8289	0.000117719	0.0018049	-1
ENSG00000169567	3094	HINT1	-1.36182	8.89568	0.00285845	0.0170392	-1
ENSG00000158985	56990	CDC42SE2	-1.45761	9.68961	0.00185313	0.013049	-1
ENSG00000072682	8974	P4HA2	-1.19683	7.06997	0.00783867	0.0315533	-1
ENSG00000131435	8572	PDLIM4	-1.31956	6.65319	0.00989786	0.0362101	-1
ENSG00000197208	6583	SLC22A4	-1.22287	5.99931	0.0143114	0.0446102	-1
ENSG00000131437	11127	KIF3A	-1.30018	7.49304	0.00619378	0.0273078	-1
ENSG00000164405	27089	UQCRQ	-1.39224	9.09096	0.00256876	0.015972	-1
ENSG00000072364	27125	AFF4	-1.18663	6.92361	0.00850649	0.033172	-1
ENSG00000113583	56951	C5orf15	-1.08104	5.65239	0.0174316	0.0498938	-1
ENSG00000213585	7416	VDAC1	-1.6488	13.0596	0.000301739	0.00371123	-1
ENSG00000113558	6500	SKP1	-1.12101	6.17069	0.0129884	0.0422765	-1
ENSG00000237190	91368	CDKN2AIPNL	-1.31501	7.26634	0.00702588	0.0294495	-1
ENSG00000113615	10802	SEC24A	-1.58278	11.8483	0.000577152	0.00594187	-1
ENSG00000031003	51306	FAM13B	-1.36658	8.73764	0.00311708	0.0180673	-1
ENSG00000112984	10112	KIF20A	-1.93372	17.08	3.58374e-05	0.000721841	-1
ENSG00000158402	995	CDC25C	-1.30351	6.38949	0.0114798	0.0394729	-1
ENSG00000132563	51308	REEP2	-2.03039	16.3705	5.20909e-05	0.000956174	-1
ENSG00000120705	2107	ETF1	-1.10649	5.9899	0.014388	0.044717	-1
ENSG00000044115	1495	CTNNA1	-1.35914	9.19115	0.00243188	0.0154298	-1
ENSG00000281398	NA	SNHG4	-1.298	5.69647	0.016999	0.0492109	-1
ENSG00000120727	51247	PAIP2	-1.11301	5.9399	0.0148018	0.0454582	-1
ENSG00000184584	340061	STING1	-1.40827	9.47071	0.00208779	0.0141078	-1
ENSG00000185129	5813	PURA	-1.3673	8.84174	0.00294419	0.0173492	-1
ENSG00000182700	492311	IGIP	-1.31038	7.17857	0.00737797	0.0304387	-1
ENSG00000120306	84418	CYSTM1	-1.29561	6.85008	0.00886371	0.0339341	-1
ENSG00000131503	54882	ANKHD1	-1.32162	5.67007	0.0172567	0.04961	-1
ENSG00000213523	10011	SRA1	-1.34351	8.24584	0.00408455	0.0214754	-1
ENSG00000176087	113829	SLC35A4	-1.25858	7.45467	0.00632719	0.0276865	-1
ENSG00000131495	4695	NDUFA2	-1.14106	5.88441	0.0152755	0.0463465	-1
ENSG00000113119	55374	TMCO6	-1.27691	5.88949	0.0152315	0.046265	-1
ENSG00000170445	3035	HARS1	-1.10595	5.83421	0.0157175	0.0471001	-1
ENSG00000204956	56114	PCDHGA1	-1.30396	6.18354	0.0128944	0.0421231	-1
ENSG00000081853	56113	PCDHGA2	-1.8673	11.6167	0.000653621	0.00641796	-1
ENSG00000262576	56111	PCDHGA4	-1.37814	7.58234	0.0058943	0.0264924	-1
ENSG00000253731	56109	PCDHGA6	-1.44722	7.68222	0.00557675	0.0256364	-1
ENSG00000276547	56101	PCDHGB5	-1.5701	9.45222	0.00210894	0.0142019	-1
ENSG00000254122	56099	PCDHGB7	-3.02171	24.654	6.86014e-07	2.85863e-05	-1
ENSG00000253159	26025	PCDHGA12	-1.20347	6.12982	0.013292	0.0429269	-1
ENSG00000131504	1729	DIAPH1	-1.46195	10.2084	0.00139799	0.0107068	-1
ENSG00000171720	8841	HDAC3	-1.12155	5.98421	0.0144345	0.0447835	-1
ENSG00000164620	285613	RELL2	-2.30415	18.4942	1.7042e-05	0.000401328	-1
ENSG00000197948	89848	FCHSD1	-1.28383	7.52694	0.00607831	0.0269498	-1
ENSG00000156453	5097	PCDH1	-2.38245	17.3061	3.18161e-05	0.000654248	-1
ENSG00000113578	2246	FGF1	-2.65054	30.2068	3.88339e-08	2.47326e-06	-1
ENSG00000145819	23092	ARHGAP26	-1.6889	11.7031	0.000623964	0.00625994	-1
ENSG00000145817	81555	YIPF5	-1.23322	7.40832	0.00649231	0.0280732	-1
ENSG00000183775	57528	KCTD16	-2.63474	25.4682	4.49726e-07	2.0447e-05	-1
ENSG00000186314	153768	PRELID2	-2.00994	14.5325	0.000137763	0.00201596	-1
ENSG00000156463	153769	SH3RF2	-2.09041	14.5453	0.000136826	0.00200598	-1
ENSG00000133706	51520	LARS1	-1.16802	6.63327	0.0100091	0.0364392	-1
ENSG00000156475	5521	PPP2R2B	-2.93616	27.5615	1.52178e-07	8.14254e-06	-1
ENSG00000178776	389336	C5orf46	-4.89034	56.3648	6.01986e-14	1.85683e-11	-1
ENSG00000169252	154	ADRB2	-1.5997	7.41783	0.00645807	0.0279957	-1
ENSG00000169247	79628	SH3TC2	-2.51906	21.2574	4.01559e-06	0.000126592	-1
ENSG00000157510	134265	AFAP1L1	-2.79825	28.0939	1.15572e-07	6.42424e-06	-1
ENSG00000164284	134266	GRPEL2	-1.21532	6.37018	0.0116054	0.0397657	-1
ENSG00000145882	78991	PCYOX1L	-1.36077	7.47703	0.0062491	0.0274747	-1
ENSG00000183111	389337	ARHGEF37	-2.313	16.6443	4.50867e-05	0.000856593	-1
ENSG00000155850	1836	SLC26A2	-1.22737	6.88387	0.00869768	0.0335724	-1
ENSG00000070614	3340	NDST1	-1.55843	11.8753	0.000568827	0.00589086	-1
ENSG00000171992	11346	SYNPO	-1.81312	15.6224	7.73343e-05	0.00129282	-1
ENSG00000256235	85027	SMIM3	-1.62837	12.0715	0.000511989	0.00543829	-1
ENSG00000211445	2878	GPX3	-2.58075	14.7506	0.000122709	0.00186184	-1
ENSG00000145901	10318	TNIP1	-1.52602	11.0976	0.00086439	0.00773041	-1
ENSG00000197043	309	ANXA6	-1.53171	11.528	0.000685549	0.00660807	-1
ENSG00000123643	206358	SLC36A1	-2.15669	19.8272	8.47657e-06	0.000230701	-1
ENSG00000113140	6678	SPARC	-1.46848	10.9028	0.000960172	0.00831287	-1
ENSG00000249035	101927096	CLMAT3	-1.91245	9.94167	0.00161579	0.0119222	-1
ENSG00000177556	475	ATOX1	-1.40544	8.95367	0.00276912	0.0167221	-1
ENSG00000275765	100652758	LOC100652758	-1.60027	7.99979	0.00467829	0.0231994	-1
ENSG00000145907	10146	G3BP1	-1.1062	6.07065	0.0137447	0.0436888	-1
ENSG00000055147	10827	FAM114A2	-1.1417	5.9145	0.0150167	0.0459141	-1
ENSG00000037749	4238	MFAP3	-1.35235	8.38675	0.00377965	0.0203972	-1
ENSG00000164574	55568	GALNT10	-1.37394	9.15583	0.00247927	0.0156122	-1
ENSG00000155506	23367	LARP1	-1.51523	11.1937	0.000820741	0.00745404	-1
ENSG00000285868	NA		-1.704	5.81923	0.0158519	0.0473809	-1
ENSG00000135074	8728	ADAM19	-1.76072	14.8075	0.000119059	0.00181986	-1
ENSG00000113282	9685	CLINT1	-1.18259	6.76694	0.00928617	0.0348724	-1
ENSG00000170214	147	ADRA1B	-2.25304	16.1532	5.84201e-05	0.00104102	-1
ENSG00000113312	7265	TTC1	-1.19839	6.75737	0.00933613	0.0349683	-1
ENSG00000221886	63920	ZBED8	-1.32	6.5738	0.0103491	0.0371086	-1
ENSG00000164611	9232	PTTG1	-1.46457	9.84085	0.00170679	0.0123901	-1
ENSG00000170584	134492	NUDCD2	-1.37379	8.17392	0.0042497	0.0219498	-1
ENSG00000072571	3161	HMMR	-1.76872	13.4044	0.000251036	0.0032327	-1
ENSG00000113643	5917	RARS1	-1.21914	7.12899	0.00758476	0.0310153	-1
ENSG00000120137	79646	PANK3	-1.19347	6.81985	0.00901501	0.0342549	-1
ENSG00000134516	1794	DOCK2	-3.03589	19.3379	1.09511e-05	0.000281951	-1
ENSG00000145936	3779	KCNMB1	-3.91781	7.09145	0.00774526	0.0313215	-1
ENSG00000204764	64901	RANBP17	-1.47961	8.05679	0.00453335	0.0228059	-1
ENSG00000072803	23291	FBXW11	-1.1427	6.28384	0.0121844	0.0409092	-1
ENSG00000072786	6793	STK10	-1.6691	12.9789	0.000315021	0.0038307	-1
ENSG00000214357	54492	NEURL1B	-1.56022	10.2353	0.00137779	0.0106141	-1
ENSG00000120129	1843	DUSP1	-1.88059	16.525	4.80133e-05	0.000902386	-1
ENSG00000113719	57222	ERGIC1	-1.32762	8.68189	0.00321388	0.018418	-1
ENSG00000037241	51121	RPL26L1	-1.53062	9.58714	0.00195944	0.0136022	-1
ENSG00000113732	8992	ATP6V0E1	-1.16315	6.54764	0.0105024	0.0374377	-1
ENSG00000164463	153222	CREBRF	-1.16952	6.25884	0.0123575	0.0412643	-1
ENSG00000113734	662	BNIP1	-1.25565	6.14216	0.0131996	0.0427423	-1
ENSG00000113739	8614	STC2	-2.36661	25.6483	4.09664e-07	1.88433e-05	-1
ENSG00000113742	80315	CPEB4	-1.70078	12.8637	0.000335011	0.00399247	-1
ENSG00000251144	NA		-2.64138	16.2296	5.61116e-05	0.00100994	-1
ENSG00000164466	94081	SFXN1	-1.95211	17.3637	3.08671e-05	0.000638908	-1
ENSG00000122203	57179	KIAA1191	-1.27722	7.88201	0.0049929	0.0239909	-1
ENSG00000175414	285598	ARL10	-1.62864	11.6086	0.000656461	0.00643013	-1
ENSG00000175416	1212	CLTB	-1.53056	11.0169	0.000902839	0.00798794	-1
ENSG00000048140	26262	TSPAN17	-1.54233	11.0103	0.000906071	0.00799405	-1
ENSG00000165671	64324	NSD1	-1.74263	14.2173	0.000162869	0.00230612	-1
ENSG00000213347	83463	MXD3	-1.7674	12.108	0.000502062	0.00535001	-1
ENSG00000169230	27166	PRELID1	-1.2068	6.97631	0.00825956	0.0326668	-1
ENSG00000131187	2161	F12	-1.68639	8.02664	0.00460942	0.0230047	-1
ENSG00000198055	2870	GRK6	-1.11547	5.7933	0.0160874	0.0477581	-1
ENSG00000131188	80758	PRR7	-1.6309	10.363	0.00128563	0.0100924	-1
ENSG00000113758	1627	DBN1	-1.29828	8.30828	0.00394648	0.0209807	-1
ENSG00000196923	9260	PDLIM7	-1.37836	9.35933	0.00221853	0.0145902	-1
ENSG00000146094	79930	DOK3	-2.43676	16.4858	4.90151e-05	0.000911414	-1
ENSG00000183258	51428	DDX41	-1.20415	6.80099	0.00911076	0.034477	-1
ENSG00000184840	54732	TMED9	-1.29054	8.13797	0.00433477	0.0222046	-1
ENSG00000027847	11285	B4GALT7	-1.27431	7.2556	0.00706801	0.029571	-1
ENSG00000087116	9509	ADAMTS2	-1.42891	9.85995	0.00168916	0.0123191	-1
ENSG00000127022	821	CANX	-1.35665	9.19933	0.00242104	0.0153996	-1
ENSG00000161013	11282	MGAT4B	-1.29359	8.03971	0.00457628	0.0229081	-1
ENSG00000197226	23061	TBC1D9B	-1.23206	7.44519	0.00636061	0.0278018	-1
ENSG00000050748	5601	MAPK9	-1.1593	6.33108	0.011864	0.0403443	-1
ENSG00000131446	4245	MGAT1	-1.51474	11.2076	0.00081465	0.00742053	-1
ENSG00000146054	81786	TRIM7	-1.44028	7.72554	0.00544451	0.0252262	-1
ENSG00000054598	2296	FOXC1	-1.17039	6.53168	0.010597	0.0375972	-1
ENSG00000112699	2762	GMDS	-1.29233	7.07053	0.00783619	0.0315513	-1
ENSG00000145949	340156	MYLK4	-1.35982	5.78952	0.016122	0.0478146	-1
ENSG00000021355	1992	SERPINB1	-1.83521	15.4208	8.6035e-05	0.00141128	-1
ENSG00000170542	5272	SERPINB9	-2.93983	22.8463	1.75489e-06	6.25989e-05	-1
ENSG00000271361	NA	HTATSF1P2	-1.92003	10.4026	0.00125837	0.00998256	-1
ENSG00000137267	7280	TUBB2A	-1.33995	8.50157	0.00354839	0.0195678	-1
ENSG00000137285	347733	TUBB2B	-1.29194	6.38069	0.0115368	0.0396253	-1
ENSG00000137266	63027	SLC22A23	-1.48711	5.66662	0.0172907	0.0496729	-1
ENSG00000270504	NA		-1.55836	10.9244	0.000949064	0.00825759	-1
ENSG00000219992	NA		-1.65078	8.11942	0.00437936	0.0223457	-1
ENSG00000260604	NA		-4.04643	59.4479	1.25578e-14	4.20313e-12	-1
ENSG00000271978	NA		-1.858	8.4731	0.00360437	0.0198045	-1
ENSG00000124782	6239	RREB1	-1.21658	6.92989	0.0084767	0.0330886	-1
ENSG00000124783	6745	SSR1	-1.11704	6.15415	0.0131104	0.0425062	-1
ENSG00000096696	1832	DSP	-1.49411	10.6161	0.00112104	0.00929634	-1
ENSG00000137203	7020	TFAP2A	-1.63016	12.516	0.000403486	0.00458615	-1
ENSG00000111846	2651	GCNT2	-4.14263	39.2115	3.8029e-10	4.18345e-08	-1
ENSG00000137210	81853	TMEM14B	-1.12373	5.86993	0.0154017	0.0465482	-1
ENSG00000078401	1906	EDN1	-1.50019	7.93621	0.00484551	0.0236279	-1
ENSG00000145979	51256,107080638	TBC1D7,TBC1D7-LOC100130357	-1.58172	9.40684	0.00216177	0.0143605	-1
ENSG00000124523	23408	SIRT5	-1.28389	6.4026	0.0113953	0.0392856	-1
ENSG00000010017	10048	RANBP9	-1.37981	9.01352	0.0026799	0.0163655	-1
ENSG00000050393	63933	MCUR1	-1.31385	7.94702	0.00481666	0.0235937	-1
ENSG00000112183	221662	RBM24	-2.28922	19.9786	7.83136e-06	0.000214334	-1
ENSG00000112186	10486	CAP2	-2.44812	26.1231	3.20335e-07	1.51783e-05	-1
ENSG00000137177	63971	KIF13A	-1.52969	11.1066	0.000860189	0.00771442	-1
ENSG00000187566	378884	NHLRC1	-2.41931	14.9615	0.000109726	0.00170226	-1
ENSG00000137364	7172	TPMT	-1.71347	13.1774	0.00028334	0.00353405	-1
ENSG00000165097	221656	KDM1B	-1.37029	8.26969	0.00403125	0.0212804	-1
ENSG00000124795	7913	DEK	-1.26791	7.85587	0.00506559	0.0242578	-1
ENSG00000137393	255488	RNF144B	-4.01854	49.3764	2.11273e-12	4.37308e-10	-1
ENSG00000228412	100506885	LNC-LBCS	-3.41215	12.5298	0.000400508	0.00456551	-1
ENSG00000172201	3400	ID4	-1.69612	10.2087	0.00139782	0.0107068	-1
ENSG00000172197	154141	MBOAT1	-2.16559	17.4909	2.88693e-05	0.000609588	-1
ENSG00000112242	1871	E2F3	-1.13163	5.81244	0.0159132	0.0474679	-1
ENSG00000146038	51473	DCDC2	-2.51093	11.0175	0.00090256	0.00798794	-1
ENSG00000124532	57380	MRS2	-1.82561	14.6401	0.000130117	0.00193283	-1
ENSG00000112293	2822	GPLD1	-3.01131	29.5472	5.45715e-08	3.32738e-06	-1
ENSG00000112294	7915	ALDH5A1	-2.02253	16.251	5.54814e-05	0.00100097	-1
ENSG00000111802	51567	TDP2	-1.17147	6.34173	0.011793	0.0401777	-1
ENSG00000112312	51053	GMNN	-2.24342	20.0683	7.47231e-06	0.000207314	-1
ENSG00000111913	9750	RIPOR2	-1.50841	10.5392	0.00116869	0.00953064	-1
ENSG00000214975	NA	PPIAP29	-1.82941	8.13529	0.00434119	0.0222065	-1
ENSG00000168405	8418	CMAHP	-1.58653	9.15346	0.00248249	0.0156146	-1
ENSG00000010704	3077	HFE	-1.23669	6.97011	0.00828825	0.032743	-1
ENSG00000275713	8345	H2BC9	-2.12499	8.03948	0.00457686	0.0229081	-1
ENSG00000124508	10385	BTN2A2	-1.44279	8.59007	0.00338	0.0190769	-1
ENSG00000112763	11120	BTN2A1	-1.19667	6.56135	0.0104217	0.037277	-1
ENSG00000124635	8970	H2BC11	-1.65853	6.11066	0.0134369	0.0431292	-1
ENSG00000233822	8341	H2BC15	-1.54642	5.83817	0.0156822	0.0470418	-1
ENSG00000189298	80317	ZKSCAN3	-1.23558	5.7982	0.0160425	0.0476832	-1
ENSG00000204642	3134	HLA-F	-1.44403	9.4775	0.00208007	0.0140948	-1
ENSG00000204574	23	ABCF1	-1.14054	6.28294	0.0121906	0.0409092	-1
ENSG00000204569	5514	PPP1R10	-1.28187	7.69682	0.00553182	0.0254964	-1
ENSG00000204560	8449	DHX16	-1.14692	6.15524	0.0131024	0.0425027	-1
ENSG00000196230	203068	TUBB	-1.30289	8.57839	0.00340177	0.0191311	-1
ENSG00000137312	10211	FLOT1	-1.15291	6.49284	0.010831	0.0381104	-1
ENSG00000214894	401247	LINC00243	-1.93874	9.2778	0.00231948	0.0149786	-1
ENSG00000204580	780	DDR1	-1.11509	5.76964	0.0163054	0.0481359	-1
ENSG00000137310	6941	TCF19	-1.93742	16.6182	4.57108e-05	0.000865316	-1
ENSG00000272221	NA		-1.39911	6.55082	0.0104836	0.0374131	-1
ENSG00000204520	100507436	MICA	-1.55153	10.6827	0.00108143	0.00904894	-1
ENSG00000206337	10866	HCP5	-2.81676	24.4066	7.79994e-07	3.18704e-05	-1
ENSG00000204516	4277	MICB	-1.35641	8.17843	0.00423914	0.0219241	-1
ENSG00000232810	7124	TNF	-4.60776	11.2333	0.000803423	0.00736947	-1
ENSG00000213719	1192	CLIC1	-1.40774	9.73939	0.00180361	0.0128267	-1
ENSG00000204394	7407	VARS1	-1.24742	7.4644	0.00629309	0.0276141	-1
ENSG00000204351	6499	SKIC2	-1.1401	5.84349	0.0156348	0.0469911	-1
ENSG00000204344	8859	STK19	-1.24865	6.29925	0.0120789	0.0407253	-1
ENSG00000244731	720,110384692	C4A,LOC110384692	-2.35967	14.656	0.000129022	0.00192566	-1
ENSG00000224389	721	C4B	-1.83716	10.7128	0.00106396	0.00895873	-1
ENSG00000204315	63943	FKBPL	-1.35443	6.99282	0.00818374	0.0324746	-1
ENSG00000204310	10554	AGPAT1	-1.27511	7.78883	0.00525703	0.0247674	-1
ENSG00000204305	177	AGER	-1.32435	5.68486	0.0171119	0.0493831	-1
ENSG00000213654	63940	GPSM3	-1.90304	14.2517	0.000159918	0.00227456	-1
ENSG00000204264	5696	PSMB8	-1.09794	5.70167	0.0169488	0.0491286	-1
ENSG00000168394	6890	TAP1	-1.54167	11.1521	0.000839372	0.00756686	-1
ENSG00000112473	7922	SLC39A7	-1.25668	7.7998	0.00522521	0.0246989	-1
ENSG00000231925	6892	TAPBP	-1.61354	12.5582	0.000394463	0.00451623	-1
ENSG00000237649	3833	KIFC1	-1.6741	12.4868	0.000409839	0.00462494	-1
ENSG00000112514	51596	CUTA	-1.39233	9.26059	0.00234138	0.0150735	-1
ENSG00000030110	578	BAK1	-1.15358	5.70257	0.0169401	0.0491126	-1
ENSG00000196821	64771	ILRUN	-1.16673	6.59638	0.0102186	0.0369114	-1
ENSG00000064995	6882	TAF11	-1.24435	6.90812	0.00858052	0.0333531	-1
ENSG00000146197	222663	SCUBE3	-1.13379	6.05603	0.0138589	0.0438395	-1
ENSG00000112039	2178	FANCE	-1.61385	9.96041	0.00159943	0.0118403	-1
ENSG00000096060	2289	FKBP5	-1.55345	8.72758	0.00313432	0.0181139	-1
ENSG00000096063	6732	SRPK1	-1.5954	11.8209	0.000585701	0.00599194	-1
ENSG00000112062	1432	MAPK14	-1.31951	8.22779	0.00412538	0.0216105	-1
ENSG00000112078	222658	KCTD20	-1.77421	14.9906	0.000108048	0.00168288	-1
ENSG00000124762	1026	CDKN1A	-1.28043	7.91791	0.00489478	0.0237288	-1
ENSG00000137168	51645	PPIL1	-1.19461	6.42482	0.0112536	0.0389935	-1
ENSG00000137200	23070	CMTR1	-1.13334	6.10498	0.0134802	0.0431799	-1
ENSG00000198937	154467	CCDC167	-1.22154	5.79277	0.0160922	0.0477636	-1
ENSG00000156639	60685	ZFAND3	-1.19847	6.96391	0.00831701	0.0327851	-1
ENSG00000164627	221458	KIF6	-2.39673	17.824	2.42303e-05	0.000533101	-1
ENSG00000146122	23500	DAAM2	-1.66099	13.0749	0.000299277	0.0036896	-1
ENSG00000124615	4337	MOCS1	-1.22279	6.57039	0.0103689	0.0371388	-1
ENSG00000124593	NA		-1.4323	6.04583	0.0139392	0.0439493	-1
ENSG00000112576	896	CCND3	-1.99604	17.8839	2.34796e-05	0.000520223	-1
ENSG00000188112	647024	C6orf132	-2.50979	24.0373	9.4487e-07	3.74402e-05	-1
ENSG00000124496	55809	TRERF1	-1.38092	8.88288	0.00287857	0.0171005	-1
ENSG00000124733	4201	MEA1	-1.11357	5.90943	0.01506	0.0459987	-1
ENSG00000124702	116138	KLHDC3	-1.32781	8.43257	0.00368559	0.0200784	-1
ENSG00000124541	88745	RRP36	-1.27584	7.57897	0.00590531	0.0265264	-1
ENSG00000171467	24149	ZNF318	-1.25546	7.37804	0.00660252	0.028417	-1
ENSG00000124574	89845	ABCC10	-1.56377	10.4584	0.0012209	0.00979901	-1
ENSG00000171462	65989	DLK2	-2.07362	15.9022	6.67008e-05	0.00115431	-1
ENSG00000204052	221424	LRRC73	-1.44783	6.32638	0.0118955	0.0404164	-1
ENSG00000124571	57510	XPO5	-1.28331	7.73341	0.00542082	0.0251871	-1
ENSG00000170734	5429	POLH	-1.53515	10.7354	0.00105107	0.00888471	-1
ENSG00000172432	54676	GTPBP2	-1.32992	8.24624	0.00408366	0.0214754	-1
ENSG00000287562	NA		-1.4834	6.57281	0.0103548	0.0371086	-1
ENSG00000137216	55362	TMEM63B	-1.58372	11.2862	0.000780833	0.00724052	-1
ENSG00000112759	2030	SLC29A1	-1.44674	8.95632	0.00276511	0.0167043	-1
ENSG00000157593	347734	SLC35B2	-1.32945	8.38841	0.00377622	0.0203934	-1
ENSG00000146232	4794	NFKBIE	-1.29842	7.02105	0.00805571	0.03213	-1
ENSG00000124813	860	RUNX2	-1.12561	5.80169	0.0160108	0.0476747	-1
ENSG00000198087	23607	CD2AP	-1.35246	8.38466	0.003784	0.0204136	-1
ENSG00000146085	4594	MMUT	-1.15674	6.30528	0.0120379	0.0406598	-1
ENSG00000031691	55166	CENPQ	-1.21528	5.97017	0.0145499	0.0449764	-1
ENSG00000112118	4172	MCM3	-1.43912	9.77456	0.00176943	0.0127216	-1
ENSG00000065308	9697	TRAM2	-1.62059	12.8941	0.000329625	0.00396429	-1
ENSG00000112144	22858	CILK1	-1.83792	15.2516	9.40951e-05	0.00150946	-1
ENSG00000112146	26268	FBXO9	-1.44758	9.75531	0.00178805	0.0127791	-1
ENSG00000012660	60481	ELOVL5	-1.12361	6.14092	0.0132088	0.042746	-1
ENSG00000001084	2729	GCLC	-1.2011	6.35577	0.0117	0.0399595	-1
ENSG00000137269	55227	LRRC1	-1.8337	13.9957	0.000183225	0.00254396	-1
ENSG00000151914	667	DST	-1.1318	6.43315	0.011201	0.0389141	-1
ENSG00000112210	51715	RAB23	-1.08309	5.68287	0.0171313	0.0494301	-1
ENSG00000146143	5558	PRIM2	-1.89114	15.7759	7.13068e-05	0.00121396	-1
ENSG00000283453	100996481	PRIM2BP	-3.08035	11.6231	0.000651388	0.00641628	-1
ENSG00000266680	NA		-1.96458	10.2092	0.00139743	0.0107068	-1
ENSG00000112305	60682	SMAP1	-1.11108	5.85334	0.0155475	0.0468451	-1
ENSG00000119900	79627	OGFRL1	-1.78713	14.9682	0.000109337	0.0016979	-1
ENSG00000079841	22999	RIMS1	-2.46673	17.3757	3.0673e-05	0.000635899	-1
ENSG00000185760	56479	KCNQ5	-1.98958	14.9912	0.000108015	0.00168288	-1
ENSG00000119899	26503	SLC17A5	-1.70799	13.2875	0.000267188	0.00338416	-1
ENSG00000111799	1303	COL12A1	-3.03116	41.3142	1.29621e-10	1.63126e-08	-1
ENSG00000112695	1347	COX7A2	-1.44455	9.74672	0.00179643	0.0127988	-1
ENSG00000112697	55754	TMEM30A	-1.12008	6.22339	0.0126073	0.0416563	-1
ENSG00000118407	27145	FILIP1	-2.19333	12.604	0.000384914	0.00442946	-1
ENSG00000196586	4646	MYO6	-1.4188	9.45257	0.00210854	0.0142019	-1
ENSG00000198478	83699	SH3BGRL2	-1.96612	17.2285	3.31423e-05	0.000675338	-1
ENSG00000235357	NA	LINC01621	-2.78124	12.7759	0.000351121	0.00413724	-1
ENSG00000218582	NA	GAPDHP63	-1.83777	6.18961	0.0128503	0.0420728	-1
ENSG00000112742	7272	TTK	-1.8456	14.4185	0.000146359	0.00211811	-1
ENSG00000083123	594	BCKDHB	-1.47976	9.24516	0.00236118	0.0151483	-1
ENSG00000005700	25998	IBTK	-1.4442	9.94663	0.00161144	0.0119012	-1
ENSG00000083097	23033	DOP1A	-1.19272	6.06436	0.0137937	0.0437342	-1
ENSG00000013375	5238	PGM3	-1.28275	7.96825	0.0047605	0.023417	-1
ENSG00000065833	4199	ME1	-1.86237	15.7499	7.22925e-05	0.00122415	-1
ENSG00000065615	51167	CYB5R4	-1.32446	7.72258	0.00545345	0.0252392	-1
ENSG00000135317	57231	SNX14	-1.2908	7.88375	0.0049881	0.0239909	-1
ENSG00000188994	23036	ZNF292	-1.24697	7.33637	0.0067573	0.0287733	-1
ENSG00000146282	57038	RARS2	-1.42576	9.6678	0.00187526	0.0131695	-1
ENSG00000111880	8732	RNGTT	-1.57662	11.0132	0.000904668	0.00799405	-1
ENSG00000198833	51465	UBE2J1	-1.11407	6.02098	0.0141368	0.0442823	-1
ENSG00000135299	22881	ANKRD6	-2.00607	9.51144	0.00204195	0.0139661	-1
ENSG00000172469	79694	MANEA	-1.14352	5.93603	0.0148344	0.0455336	-1
ENSG00000146263	253714	MMS22L	-1.7615	12.8424	0.000338847	0.00402598	-1
ENSG00000112237	892	CCNC	-1.51274	10.7114	0.0010648	0.00895873	-1
ENSG00000112246	6492	SIM1	-1.9966	18.6239	1.59209e-05	0.000381205	-1
ENSG00000112249	10973	ASCC3	-1.6689	13.3021	0.000265109	0.00336587	-1
ENSG00000260000	NA		-1.75133	10.4446	0.00123007	0.00985246	-1
ENSG00000164418	2898	GRIK2	-1.09961	5.87509	0.0153565	0.0464923	-1
ENSG00000112276	11149	BVES	-1.55839	9.61864	0.00192612	0.0134248	-1
ENSG00000132429	64208	POPDC3	-1.78709	11.8537	0.000575464	0.00593722	-1
ENSG00000057663	9474	ATG5	-1.11565	5.83593	0.0157021	0.0470673	-1
ENSG00000164494	57107	PDSS2	-1.23472	6.3341	0.0118438	0.040293	-1
ENSG00000025796	11231	SEC63	-1.0959	5.88068	0.0153079	0.0463807	-1
ENSG00000272476	NA		-1.65529	8.04245	0.00456938	0.0229066	-1
ENSG00000081087	28962	OSTM1	-1.96893	17.2524	3.27288e-05	0.000669514	-1
ENSG00000135537	246269	AFG1L	-1.24219	5.73934	0.016589	0.048533	-1
ENSG00000118690	84071	ARMC2	-1.29453	5.67953	0.017164	0.0494478	-1
ENSG00000183137	285753	CEP57L1	-1.21457	6.05865	0.0138384	0.0438011	-1
ENSG00000135596	64780	MICAL1	-1.13911	6.16644	0.0130197	0.0423237	-1
ENSG00000112367	9896	FIG4	-1.72059	12.9671	0.00031702	0.003851	-1
ENSG00000112290	8936	WASF1	-1.28074	7.54614	0.00601387	0.0268076	-1
ENSG00000203797	8528	DDO	-1.74822	10.2255	0.0013851	0.0106496	-1
ENSG00000173214	91749	MFSD4B	-1.8756	13.4481	0.000245252	0.00318216	-1
ENSG00000288560	NA		-1.9337	8.98071	0.00272844	0.0165591	-1
ENSG00000223811	NA		-1.47999	6.3103	0.0120038	0.0406198	-1
ENSG00000249853	222537	HS3ST5	-1.36585	7.33538	0.00676102	0.0287733	-1
ENSG00000178425	221294	NT5DC1	-1.34515	8.34099	0.00387606	0.0207114	-1
ENSG00000187189	23270	TSPYL4	-1.16081	6.42796	0.0112338	0.038978	-1
ENSG00000183807	221303	FAM162B	-1.3426	7.17184	0.00740567	0.030521	-1
ENSG00000153989	116150	NUS1	-1.12711	6.00426	0.0142713	0.044553	-1
ENSG00000152661	2697	GJA1	-1.84801	16.6727	4.44159e-05	0.000850009	-1
ENSG00000111907	7164	TPD52L1	-4.28494	67.0665	2.62498e-16	1.29042e-13	-1
ENSG00000111906	51020	HDDC2	-1.25768	7.45363	0.00633087	0.0276949	-1
ENSG00000203760	387103	CENPW	-1.48777	8.56237	0.00343182	0.0192052	-1
ENSG00000093144	55862	ECHDC1	-1.1276	6.0541	0.013874	0.043856	-1
ENSG00000152894	5796	PTPRK	-1.21886	7.33607	0.00675846	0.0287733	-1
ENSG00000196569	3908	LAMA2	-1.72266	14.4563	0.000143448	0.00208749	-1
ENSG00000219642	100421515	BMPR1AP1	-1.6923	6.45632	0.0110559	0.0386484	-1
ENSG00000146376	93663	ARHGAP18	-1.6313	12.4629	0.000415108	0.004661	-1
ENSG00000079819	2037	EPB41L2	-1.14249	6.37526	0.0115722	0.0397186	-1
ENSG00000079950	8417	STX7	-1.24395	7.37916	0.0065984	0.0284071	-1
ENSG00000112339	10767	HBS1L	-1.22989	7.19493	0.007311	0.0302815	-1
ENSG00000118513	4602	MYB	-2.23215	12.215	0.000474078	0.00515221	-1
ENSG00000146410	113115	MTFR2	-1.59663	9.09847	0.00255823	0.0159264	-1
ENSG00000118503	7128	TNFAIP3	-1.78843	13.6328	0.000222273	0.00295818	-1
ENSG00000112378	64065	PERP	-1.64306	12.835	0.000340193	0.00403588	-1
ENSG00000051620	23593	HEBP2	-1.46039	9.67984	0.00186301	0.0131069	-1
ENSG00000024862	25901	CCDC28A	-1.63705	10.6215	0.0011178	0.00927436	-1
ENSG00000135597	85021	REPS1	-1.26167	7.31406	0.0068417	0.0289646	-1
ENSG00000146386	58527	ABRACL	-1.82149	12.5024	0.000406429	0.00459967	-1
ENSG00000112406	51696	HECA	-1.53971	11.098	0.000864188	0.00773041	-1
ENSG00000226571	NA		-2.51406	11.129	0.000849905	0.00765304	-1
ENSG00000164442	10370	CITED2	-2.75878	34.7346	3.77864e-09	3.21307e-07	-1
ENSG00000231426	100132735	FILNC1	-4.41221	44.9595	2.01149e-11	3.07211e-09	-1
ENSG00000236013	100507477	LINC02941	-3.56516	32.1259	1.44497e-08	1.03794e-06	-1
ENSG00000285875			-1.94729	13.2994	0.000265488	0.00336587	-1
ENSG00000259828	NA		-4.42935	31.0477	2.51759e-08	1.69975e-06	-1
ENSG00000009844	51534	VTA1	-1.438	9.81812	0.00172801	0.0124981	-1
ENSG00000112414	57211	ADGRG6	-3.38427	46.2241	1.05472e-11	1.76509e-09	-1
ENSG00000229017	NA	LINC01277	-1.66499	6.42755	0.0112363	0.038978	-1
ENSG00000146416	51390	AIG1	-1.46525	9.49537	0.00205991	0.0140218	-1
ENSG00000001036	2519	FUCA2	-1.08282	5.65174	0.0174381	0.0498938	-1
ENSG00000112419	9749	PHACTR2	-1.33605	8.37818	0.00379753	0.0204496	-1
ENSG00000135604	8676	STX11	-1.58357	8.88153	0.0028807	0.0171005	-1
ENSG00000152818	7402	UTRN	-1.49213	10.7284	0.00105504	0.00891344	-1
ENSG00000118508	10981	RAB32	-1.96382	17.1812	3.39783e-05	0.000689694	-1
ENSG00000164506	134957	STXBP5	-1.16648	6.54829	0.0104985	0.0374356	-1
ENSG00000203727	389432	SAMD5	-2.44604	25.8387	3.71167e-07	1.73775e-05	-1
ENSG00000111961	23328	SASH1	-1.20423	7.07137	0.00783254	0.0315447	-1
ENSG00000120253	348995	NUP43	-1.2298	6.9628	0.00832216	0.0327863	-1
ENSG00000120265	5110	PCMT1	-1.15283	6.39067	0.0114722	0.0394553	-1
ENSG00000131015	80328	ULBP2	-2.0987	15.7795	7.11703e-05	0.00121298	-1
ENSG00000131019	79465	ULBP3	-1.43138	6.82343	0.00899698	0.0342173	-1
ENSG00000131016	9590	AKAP12	-2.06169	19.5752	9.67142e-06	0.000254417	-1
ENSG00000112029	26271	FBXO5	-1.37023	8.23126	0.0041175	0.0215764	-1
ENSG00000112031	54516	MTRF1L	-1.205	6.06403	0.0137962	0.0437342	-1
ENSG00000153721	154043	CNKSR3	-1.3613	7.28114	0.00696824	0.0292938	-1
ENSG00000029639	51106	TFB1M	-1.52863	8.8994	0.00285264	0.0170239	-1
ENSG00000146433	57583	TMEM181	-1.35908	8.78676	0.00303425	0.0177112	-1
ENSG00000146425	6993	DYNLT1	-1.17779	6.49867	0.0107955	0.038043	-1
ENSG00000164674	94120	SYTL3	-1.85675	10.9554	0.00093333	0.0081642	-1
ENSG00000092820	7430	EZR	-2.20794	21.9638	2.77845e-06	9.24055e-05	-1
ENSG00000130363	83861	RSPH3	-1.74065	12.5128	0.000404175	0.00459067	-1
ENSG00000112096	6648	SOD2	-1.47031	10.4928	0.00119838	0.00969673	-1
ENSG00000120437	39	ACAT2	-1.32042	7.62781	0.0057475	0.0261127	-1
ENSG00000197081	3482	IGF2R	-1.34673	8.94479	0.00278262	0.0167737	-1
ENSG00000112531	9444	QKI	-1.13789	6.37447	0.0115774	0.0397216	-1
ENSG00000071242	6196	RPS6KA2	-1.11257	5.98065	0.0144636	0.0448242	-1
ENSG00000130396	4301	AFDN	-1.40166	8.99578	0.00270603	0.0164484	-1
ENSG00000286826	NA		-3.05737	16.4676	4.94892e-05	0.000918059	-1
ENSG00000223485	101929484	LINC01615	-2.1651	19.2131	1.16907e-05	0.000297101	-1
ENSG00000186340	7058	THBS2	-2.41303	27.2667	1.77234e-07	9.16812e-06	-1
ENSG00000226194	NA	LINC02519	-2.39514	17.553	2.79403e-05	0.000593958	-1
ENSG00000188191	5575	PRKAR1B	-1.31453	7.55358	0.00598909	0.026746	-1
ENSG00000239857	51608	GET4	-1.48188	7.69627	0.00553349	0.0254964	-1
ENSG00000146540	84310	C7orf50	-1.6464	12.4779	0.000411805	0.00463716	-1
ENSG00000164849	115330	GPR146	-2.69116	22.2409	2.40501e-06	8.22462e-05	-1
ENSG00000229043	101927021	ZFAND2A-DT	-1.35653	6.88874	0.00867404	0.0335469	-1
ENSG00000164880	26173	INTS1	-1.2858	7.96864	0.00475948	0.023417	-1
ENSG00000106263	8662	EIF3B	-1.13212	6.30764	0.0120219	0.0406327	-1
ENSG00000136213	55501	CHST12	-1.16264	6.13034	0.0132881	0.0429269	-1
ENSG00000136295	80727	TTYH3	-1.31642	8.58954	0.00338099	0.0190769	-1
ENSG00000174945	155185	AMZ1	-1.48046	8.91935	0.00282164	0.0169159	-1
ENSG00000146535	2768	GNA12	-1.18228	6.76715	0.00928511	0.0348724	-1
ENSG00000146587	57786	RBAK	-1.23764	6.61658	0.0101034	0.0366278	-1
ENSG00000164638	222962	SLC29A4	-1.77337	11.6788	0.000632148	0.00631786	-1
ENSG00000155034	80028	FBXL18	-1.71922	13.3778	0.000254615	0.00326169	-1
ENSG00000075624	60	ACTB	-1.9524	18.7174	1.5159e-05	0.00036687	-1
ENSG00000235944	NA	ZNF815P	-1.45351	6.81165	0.00905652	0.0343628	-1
ENSG00000122674	51622	CCZ1	-1.57568	9.81173	0.00173402	0.01253	-1
ENSG00000122512	5395	PMS2	-1.38922	7.65848	0.0056506	0.0258175	-1
ENSG00000106305	7965	AIMP2	-1.47884	9.35426	0.00222468	0.0146123	-1
ENSG00000086232	27102	EIF2AK1	-1.18096	6.76419	0.00930053	0.0349097	-1
ENSG00000008256	9265	CYTH3	-1.35457	8.86869	0.00290103	0.0171693	-1
ENSG00000136238	5879	RAC1	-1.07749	5.79351	0.0160854	0.0477581	-1
ENSG00000164535	221955	DAGLB	-1.56975	10.972	0.00092501	0.00812924	-1
ENSG00000136240	11014	KDELR2	-1.34492	8.99464	0.00270772	0.0164524	-1
ENSG00000136247	55146	ZDHHC4	-1.21144	6.32134	0.0119293	0.0404591	-1
ENSG00000146574	221960	CCZ1B	-1.67487	11.259	0.000792381	0.00729797	-1
ENSG00000106392	56913	C1GALT1	-1.58772	11.1597	0.000835926	0.00754877	-1
ENSG00000164654	54468	MIOS	-1.12854	5.81671	0.0158746	0.0474034	-1
ENSG00000106399	6119	RPA3	-1.31548	6.90946	0.0085741	0.0333447	-1
ENSG00000106415	113263	GLCCI1	-1.42052	8.61047	0.00334236	0.0189375	-1
ENSG00000189043	4697	NDUFA4	-1.36166	8.84145	0.00294466	0.0173492	-1
ENSG00000106460	54664	TMEM106B	-1.62145	12.5037	0.000406148	0.00459967	-1
ENSG00000122644	10124	ARL4A	-1.61138	10.385	0.00127046	0.0100531	-1
ENSG00000136267	1607	DGKB	-1.33569	6.20944	0.0127071	0.0418104	-1
ENSG00000106524	57037	ANKMY2	-1.11459	5.71938	0.0167786	0.0488313	-1
ENSG00000136261	28969	BZW2	-1.38045	9.0988	0.00255777	0.0159264	-1
ENSG00000106537	27075	TSPAN13	-1.81683	12.8889	0.00033054	0.00396429	-1
ENSG00000048052	9734	HDAC9	-2.98007	32.9207	9.59965e-09	7.36645e-07	-1
ENSG00000105877	8701	DNAH11	-4.18278	47.4474	5.64998e-12	1.01e-09	-1
ENSG00000164649	55536	CDCA7L	-1.41579	9.44341	0.0021191	0.0142359	-1
ENSG00000105889	256227,401312	STEAP1B,LOC401312	-2.42248	18.1829	2.00674e-05	0.000456845	-1
ENSG00000136244	3569	IL6	-5.74141	90.6488	1.71573e-21	3.37377e-18	-1
ENSG00000228649	109729180	SNHG26	-1.29775	6.47835	0.0109197	0.0383004	-1
ENSG00000122591	84668	HYCC1	-1.46921	10.3151	0.00131943	0.0102561	-1
ENSG00000136231	10643	IGF2BP3	-1.26349	7.55797	0.00597454	0.0266928	-1
ENSG00000105928	1687	GSDME	-1.75832	14.1766	0.000166429	0.00234806	-1
ENSG00000172115	54205	CYCS	-1.46589	10.2152	0.00139288	0.0106937	-1
ENSG00000105991	3198	HOXA1	-1.35352	6.22907	0.012567	0.0416104	-1
ENSG00000122592	3204	HOXA7	-1.3274	6.86325	0.00879866	0.0338002	-1
ENSG00000005073	3207	HOXA11	-1.30857	8.13095	0.0043516	0.0222473	-1
ENSG00000253508	NA		-1.36586	6.56358	0.0104087	0.0372643	-1
ENSG00000106031	3209	HOXA13	-1.48168	10.393	0.00126494	0.0100246	-1
ENSG00000106049	11112	HIBADH	-1.55479	11.3824	0.000741421	0.00697565	-1
ENSG00000106052	8887	TAX1BP1	-1.23307	7.46525	0.00629011	0.0276087	-1
ENSG00000153814	221895	JAZF1	-1.1931	6.7621	0.00931144	0.0349284	-1
[truncated: 13,732 more rows]

## Sheet: Up in leo1
ensembl	entrez	symbol	Leo1_01_logFC	Leo1_01_LR	Leo1_01_PValue	Leo1_01_FDR	Leo1_01_DE
ENSG00000228463	728481	RPL23AP21	2.10299	10.1869	0.00141442	0.0184803	1
ENSG00000187608	9636	ISG15	2.52578	27.5709	1.51441e-07	5.98605e-06	1
ENSG00000188157	375790	AGRN	1.36408	9.26612	0.00233431	0.0283074	1
ENSG00000217801	100288175	LOC100288175	2.39046	16.649	4.49746e-05	0.000963891	1
ENSG00000272449	NA		2.3521	9.43056	0.00213399	0.0262264	1
ENSG00000162413	9903	KLHL21	1.39819	9.21078	0.00240594	0.0290467	1
ENSG00000120937	4879	NPPB	4.97808	14.8305	0.000117618	0.00221852	1
ENSG00000142627	1969	EPHA2	1.84361	15.8218	6.9597e-05	0.00140724	1
ENSG00000186301	NA	MST1P2	3.20636	16.4889	4.89362e-05	0.00103331	1
ENSG00000117115	11240	PADI2	2.95001	18.7053	1.52559e-05	0.000367521	1
ENSG00000204362	400743	LINC02783	3.19912	13.6478	0.000220496	0.00381168	1
ENSG00000142623	29943	PADI1	2.51819	17.1092	3.52914e-05	0.000778639	1
ENSG00000183114	163933	FAM43B	3.86535	39.9794	2.56654e-10	1.78647e-08	1
ENSG00000158825	978	CDA	3.30903	12.5344	0.000399537	0.00639381	1
ENSG00000189410	400745	SH2D5	1.76981	10.2103	0.00139656	0.0182773	1
ENSG00000179546	3352	HTR1D	2.32941	18.3009	1.88619e-05	0.000445521	1
ENSG00000117318	3399	ID3	1.99424	18.2827	1.90431e-05	0.000447783	1
ENSG00000126709	2537	IFI6	2.40146	26.4897	2.64944e-07	9.85305e-06	1
ENSG00000168528	347735	SERINC2	2.03918	18.9906	1.31364e-05	0.000321882	1
ENSG00000121904	114784	CSMD2	3.76545	35.9156	2.06048e-09	1.18731e-07	1
ENSG00000274386	100129924	TMEM269	2.56422	13.8858	0.00019426	0.00340926	1
ENSG00000203995	440590	ZYG11A	1.81431	11.3152	0.00076875	0.0111664	1
ENSG00000162383	6512	SLC1A7	5.30996	58.9914	1.5836e-14	2.44232e-12	1
ENSG00000235563	NA		3.13291	18.9527	1.34002e-05	0.000326314	1
ENSG00000116133	1718	DHCR24	2.42754	26.6673	2.41676e-07	9.09521e-06	1
ENSG00000169174	255738	PCSK9	3.46931	34.3822	4.52838e-09	2.49951e-07	1
ENSG00000173406	1600	DAB1	3.02706	24.3574	8.00179e-07	2.74348e-05	1
ENSG00000237352	NA	LINC01358	1.77994	11.4367	0.000720093	0.0105375	1
ENSG00000235545	NA	DOCK7-DT	1.74485	8.14764	0.00431173	0.0477661	1
ENSG00000116675	9829	DNAJC6	1.7287	13.5662	0.000230298	0.0039556	1
ENSG00000117069	81849	ST6GALNAC5	3.0286	33.9026	5.79427e-09	3.11091e-07	1
ENSG00000288543	NA		2.82523	12.7078	0.000364143	0.00585719	1
ENSG00000154027	26289	AK5	1.49338	8.8363	0.00295298	0.0346666	1
ENSG00000137959	10964	IFI44L	1.92834	14.0991	0.000173423	0.0030896	1
ENSG00000097096	84144	SYDE2	1.63188	11.8064	0.000590282	0.00892001	1
ENSG00000282057	NA		1.83791	12.2406	0.000467605	0.0073193	1
ENSG00000117228	2633	GBP1	1.45624	10.1355	0.00145442	0.0189509	1
ENSG00000234518	NA	PTGES3P1	2.13956	13.7933	0.000204064	0.0035471	1
ENSG00000162645	2634	GBP2	1.34369	8.66145	0.00325013	0.0375939	1
ENSG00000117525	2152	F3	2.61788	30.7038	3.00568e-08	1.38658e-06	1
ENSG00000117600	9890	PLPPR4	1.9515	17.6259	2.68904e-05	0.00061129	1
ENSG00000099260	54873	PALMD	4.03899	8.50806	0.00353577	0.0403517	1
ENSG00000162631	22854	NTNG1	2.37329	21.4133	3.70198e-06	0.000105883	1
ENSG00000134202	2947	GSTM3	2.22501	20.0339	7.60828e-06	0.000200815	1
ENSG00000171385	3752	KCND3	7.35163	43.1643	5.03307e-11	3.93907e-09	1
ENSG00000177173	NA	NAP1L4P1	2.85389	20.2215	6.89749e-06	0.000183909	1
ENSG00000273213	440686	H3-7	1.67933	8.72159	0.00314464	0.0365619	1
ENSG00000203814	440689	H2BC18	2.28481	8.47764	0.00359539	0.0408664	1
ENSG00000143367	7286	TUFT1	2.08258	19.4408	1.03766e-05	0.00026169	1
ENSG00000182134	11022	TDRKH	1.9454	13.2056	0.000279118	0.00465128	1
ENSG00000196420	6276	S100A5	2.66807	15.7588	7.19514e-05	0.00144371	1
ENSG00000169242	1942	EFNA1	3.42848	22.2712	2.36729e-06	7.13407e-05	1
ENSG00000160781	79957	PAQR6	2.48267	17.4991	2.8744e-05	0.000651545	1
ENSG00000158869	2207	FCER1G	3.39042	21.2098	4.11647e-06	0.000116259	1
ENSG00000158887	4359	MPZ	2.2937	12.0686	0.000512779	0.00793169	1
ENSG00000117152	5999	RGS4	1.84599	15.8973	6.68725e-05	0.00136975	1
ENSG00000143248	8490	RGS5	1.69731	11.103	0.000861864	0.0122697	1
ENSG00000143162	8804	CREG1	1.39927	9.03601	0.00264713	0.0314992	1
ENSG00000007933	2328	FMO3	4.05956	47.3193	6.03141e-12	5.51629e-10	1
ENSG00000094963	2327	FMO2	8.02581	54.973	1.22197e-13	1.49015e-11	1
ENSG00000010932	2326	FMO1	3.92415	46.3564	9.85837e-12	8.52099e-10	1
ENSG00000076258	2329	FMO4	2.96176	34.8697	3.52518e-09	1.96648e-07	1
ENSG00000233328	NA	PFN1P1	2.09645	8.8231	0.00297441	0.0348922	1
ENSG00000224228	NA		7.27733	43.9488	3.37074e-11	2.69163e-09	1
ENSG00000120337	8995	TNFSF18	7.68724	164.833	9.94712e-38	7.82391e-34	1
ENSG00000117592	9588	PRDX6	1.42165	10.008	0.00155862	0.0200316	1
ENSG00000121454	89884	LHX4	2.97773	15.9136	6.63007e-05	0.00135981	1
ENSG00000143333	6004	RGS16	2.91143	17.1414	3.46982e-05	0.000766625	1
ENSG00000058085	3918	LAMC2	2.14163	16.9094	3.9206e-05	0.000854223	1
ENSG00000157064	23057	NMNAT2	1.66564	11.7317	0.000614429	0.00918782	1
ENSG00000230426	104169671	LINC01036	2.37318	10.994	0.000914079	0.0129079	1
ENSG00000162670	339479	BRINP3	7.04415	59.7953	1.05256e-14	1.68957e-12	1
ENSG00000150681	64407	RGS18	3.07231	15.8856	6.72879e-05	0.00137647	1
ENSG00000285280	NA		1.75105	9.37965	0.00219408	0.0268091	1
ENSG00000253148	431704	RGS21	3.19523	16.4934	4.88187e-05	0.00103221	1
ENSG00000081237	5788	PTPRC	4.17115	48.4226	3.4358e-12	3.26606e-10	1
ENSG00000008118	57172	CAMK1G	2.42564	19.8292	8.46773e-06	0.00021945	1
ENSG00000092969	7042	TGFB2	3.22777	41.4794	1.19118e-10	8.71555e-09	1
ENSG00000143816	7483	WNT9A	1.8622	13.5596	0.000231102	0.00396453	1
ENSG00000181218	92815	H2AC25	2.06541	14.9463	0.000110616	0.00210156	1
ENSG00000196890	128312	H2BC26	3.56405	14.6037	0.000132655	0.00245505	1
ENSG00000168243	2786	GNG4	2.27546	15.2488	9.42342e-05	0.00182561	1
ENSG00000198626	6262	RYR2	3.63199	18.1246	2.06907e-05	0.000482915	1
ENSG00000182901	6000	RGS7	2.16519	16.0007	6.33188e-05	0.00130375	1
ENSG00000287516	NA		1.86841	12.901	0.000328407	0.00536466	1
ENSG00000260698	NA		2.10296	8.50596	0.00353985	0.0403517	1
ENSG00000169224	148823	GCSAML	6.38692	29.7284	4.97001e-08	2.17176e-06	1
ENSG00000169214	343169	OR6F1	6.36375	29.4499	5.73805e-08	2.47302e-06	1
ENSG00000177462	343172	OR2T8	9.59812	87.9844	6.59732e-21	3.31616e-18	1
ENSG00000197067	NA	OR2T32P	7.29469	42.5147	7.01536e-11	5.33134e-09	1
ENSG00000272275	NA		3.69207	32.7661	1.03944e-08	5.22412e-07	1
ENSG00000138083	6496	SIX3	2.47725	15.0699	0.000103601	0.00198265	1
ENSG00000233251	100129434	LOC100129434	2.36104	17.9025	2.32518e-05	0.000536325	1
ENSG00000055813	114800	CCDC85A	3.15104	39.7915	2.82568e-10	1.93264e-08	1
ENSG00000124374	400961	PAIP2B	2.20376	10.5405	0.00116788	0.0158379	1
ENSG00000230002	100874291	ALMS1-IT1	1.86838	10.3768	0.00127606	0.0169113	1
ENSG00000163017	72	ACTG2	4.1705	66.7459	3.08862e-16	6.56583e-14	1
ENSG00000257702	151534	LBX2-AS1	2.07059	10.7844	0.0010236	0.0142331	1
ENSG00000115297	3196	TLX2	7.45803	45.052	1.91874e-11	1.60552e-09	1
ENSG00000159399	3099	HK2	1.96177	17.4614	2.93193e-05	0.000662676	1
ENSG00000115353	6869	TACR1	2.76214	20.9988	4.5956e-06	0.00012818	1
ENSG00000222000	NA		3.45119	13.8826	0.000194589	0.00340926	1
ENSG00000237880	105373538	LINC01885	6.67044	33.2359	8.16302e-09	4.20256e-07	1
ENSG00000286769	NA		6.5878	52.1359	5.17907e-13	5.73746e-11	1
ENSG00000271709	124907880	LOC124907880	3.04643	19.3891	1.06613e-05	0.000267913	1
ENSG00000272789	NA		3.98833	19.4401	1.03804e-05	0.00026169	1
ENSG00000152127	4249	MGAT5	1.98826	18.8383	1.42284e-05	0.000343819	1
ENSG00000144229	80731	THSD7B	2.34549	13.3003	0.00026536	0.0044503	1
ENSG00000226674	401014	TEX41	2.62351	13.1918	0.000281172	0.00466081	1
ENSG00000168280	3800	KIF5C	2.30419	18.6282	1.58857e-05	0.000379783	1
ENSG00000150556	130576	LYPD6B	4.0934	50.4103	1.24741e-12	1.29953e-10	1
ENSG00000187123	130574	LYPD6	2.4418	25.9956	3.42201e-07	1.2519e-05	1
ENSG00000115963	390	RND3	1.61106	12.8075	0.000345238	0.0055913	1
ENSG00000237220	NA		4.94203	14.2486	0.000160179	0.00289297	1
ENSG00000224048	101929282	LINC02612	4.5219	26.7545	2.31018e-07	8.75698e-06	1
ENSG00000081479	4036	LRP2	8.544	68.1537	1.51239e-16	3.60475e-14	1
ENSG00000115844	1746	DLX2	2.29581	21.3967	3.73407e-06	0.000106607	1
ENSG00000150722	151242	PPP1R1C	4.89174	24.7591	6.49624e-07	2.276e-05	1
ENSG00000115415	6772	STAT1	1.43424	10.1218	0.00146524	0.0190493	1
ENSG00000138411	57520	HECW2	1.45887	9.78483	0.00175958	0.0223225	1
ENSG00000138356	316	AOX1	1.71238	11.7814	0.000598268	0.00899746	1
ENSG00000232133	100874399	IMPDH1P10	2.81625	11.4734	0.000705982	0.0103502	1
ENSG00000138395	65061	CDK15	2.27631	22.3937	2.22099e-06	6.7579e-05	1
ENSG00000222035	729224	KIAA2012-AS1	2.93076	27.8368	1.31992e-07	5.28336e-06	1
ENSG00000138413	3417	IDH1	1.43063	9.68292	0.00185989	0.0234438	1
ENSG00000225166	102724849	LOC102724849	3.95511	34.104	5.22431e-09	2.84372e-07	1
ENSG00000235770	646324	LINC00607	3.53611	35.5083	2.53972e-09	1.43713e-07	1
ENSG00000260804	150967	LINC01963	1.67289	11.8036	0.000591148	0.00892452	1
ENSG00000231672	NA	DIRC3	1.92891	12.4282	0.000422898	0.00669276	1
ENSG00000273361	NA		2.56253	11.7361	0.000613002	0.0091752	1
ENSG00000072182	55515	ASIC4	4.1094	24.1846	8.75293e-07	2.95477e-05	1
ENSG00000135914	3357	HTR2B	3.39577	33.586	6.81832e-09	3.5753e-07	1
ENSG00000221944	200765	TIGD1	1.92792	13.4282	0.00024787	0.00421996	1
ENSG00000115468	80303	EFHD1	1.39373	9.04662	0.00263181	0.0313644	1
ENSG00000168427	377007	KLHL30	4.47835	20.4003	6.28195e-06	0.000169505	1
ENSG00000146205	50636	ANO7	2.71716	19.2566	1.14277e-05	0.000285348	1
ENSG00000125046	51066	SSUH2	3.06327	19.8403	8.41886e-06	0.000218904	1
ENSG00000180914	5021	OXTR	1.49836	11.12	0.000853996	0.0121908	1
ENSG00000088726	55287	TMEM40	4.673	12.497	0.000407608	0.00649911	1
ENSG00000131379	84077	C3orf20	2.09205	8.72346	0.00314142	0.0365515	1
ENSG00000163491	152110	NEK10	2.35837	16.8703	4.00234e-05	0.000867228	1
ENSG00000188167	643853	TMPPE	2.31131	18.1477	2.04415e-05	0.000477808	1
ENSG00000271643	105377023	PDCD6IP-DT	1.56185	9.6719	0.00187108	0.0234908	1
ENSG00000144681	6769	STAC	6.4309	92.9697	5.31019e-22	3.21287e-19	1
ENSG00000168334	165904	XIRP1	3.10342	10.8714	0.000976591	0.0137045	1
ENSG00000168329	1524	CX3CR1	2.94164	13.9003	0.000192771	0.00339204	1
ENSG00000286996			2.70538	15.8651	6.80204e-05	0.00138425	1
ENSG00000162267	3699	ITIH3	3.27131	19.3404	1.09368e-05	0.000273524	1
ENSG00000241472	100506994	PTPRG-AS1	1.95395	11.7842	0.000597358	0.00899585	1
ENSG00000064225	10402	ST3GAL6	4.17347	17.1064	3.53431e-05	0.000778686	1
ENSG00000243701	344595	DUBR	1.53006	10.7084	0.00106649	0.0146908	1
ENSG00000240891	257068	PLCXD2	1.57712	9.20621	0.00241196	0.0290971	1
ENSG00000206527	201562	HACD2	1.41379	9.48329	0.00207352	0.0256234	1
ENSG00000221955	84561	SLC12A8	2.05457	15.8755	6.76484e-05	0.00138205	1
ENSG00000260633	NA		2.28977	13.3164	0.000263096	0.00441703	1
ENSG00000174564	53833	IL20RB	2.18181	16.9732	3.79113e-05	0.000828309	1
ENSG00000120756	5357	PLS1	3.44108	35.6177	2.4009e-09	1.36349e-07	1
ENSG00000144891	185	AGTR1	2.98898	32.7744	1.03496e-08	5.21827e-07	1
ENSG00000163751	1359	CPA3	6.69208	110.285	8.48712e-26	8.34443e-23	1
ENSG00000287198	NA		6.98207	38.8364	4.60861e-10	3.04614e-08	1
ENSG00000152580	285313	IGSF10	2.22403	8.67011	0.00323472	0.0374708	1
ENSG00000198829	56670	SUCNR1	6.20432	48.039	4.17816e-12	3.9123e-10	1
ENSG00000286585	105374174	LOC105374174	3.06484	16.0516	6.16382e-05	0.00127415	1
ENSG00000240875	730091	LINC00886	2.4575	22.1619	2.50596e-06	7.49453e-05	1
ENSG00000163661	5806	PTX3	1.63501	12.8092	0.00034491	0.0055913	1
ENSG00000241369	647107	LINC01192	8.72347	69.59	7.30047e-17	1.88268e-14	1
ENSG00000114200	590	BCHE	3.4116	20.34	6.48317e-06	0.000174336	1
ENSG00000163536	5274	SERPINI1	2.52595	15.2011	9.66453e-05	0.00186543	1
ENSG00000286695	NA		3.64692	31.6107	1.88388e-08	8.98038e-07	1
ENSG00000239739	NA		2.66385	12.7466	0.000356664	0.00574277	1
ENSG00000154310	23043	TNIK	2.38263	21.5083	3.52307e-06	0.000101319	1
ENSG00000279673	NA		2.43476	10.7833	0.00102421	0.0142331	1
ENSG00000228221	100505566	LINC00578	2.44711	8.85598	0.0029213	0.0343717	1
ENSG00000231574	102724550	LINC02015	2.95699	9.48458	0.00207206	0.0256234	1
ENSG00000225790	NA		4.9077	14.1445	0.000169289	0.00303313	1
ENSG00000223930	NA		3.61445	20.5263	5.88172e-06	0.000160078	1
ENSG00000163898	200879	LIPH	3.79007	22.2148	2.43783e-06	7.33261e-05	1
ENSG00000233308	106480738	OSTN-AS1	3.45231	26.6608	2.42494e-07	9.10424e-06	1
ENSG00000223812	NA	PYDC2-AS1	4.4567	54.3234	1.70068e-13	2.05795e-11	1
ENSG00000198155	642280	ZNF876P	2.41528	11.9826	0.000536987	0.00824132	1
ENSG00000152953	55351	STK32B	1.56802	11.3529	0.000753301	0.0109927	1
ENSG00000248698	152742	LINC01085	1.45359	8.66186	0.0032494	0.0375939	1
ENSG00000251410	NA		4.67456	12.4513	0.000417712	0.0066307	1
ENSG00000169851	5099	PCDH7	8.64337	97.2019	6.26075e-23	4.6899e-20	1
ENSG00000121895	80008	TMEM156	5.73232	21.9789	2.7567e-06	8.0906e-05	1
ENSG00000163293	152519	NIPAL1	2.1295	16.3649	5.22436e-05	0.00109579	1
ENSG00000198515	1259	CNGA1	3.02514	15.849	6.86039e-05	0.00139253	1
ENSG00000074966	7294	TXK	2.86103	14.4738	0.000142123	0.00261184	1
ENSG00000145242	2044	EPHA5	1.52923	10.529	0.00117515	0.0159227	1
ENSG00000249413	NA		5.08913	27.2845	1.7561e-07	6.83791e-06	1
ENSG00000171234	7364	UGT2B7	4.97161	45.8306	1.28934e-11	1.09636e-09	1
ENSG00000171195	4589	MUC7	5.15779	29.4348	5.78308e-08	2.48562e-06	1
ENSG00000138772	306	ANXA3	2.77204	9.6523	0.00189114	0.023686	1
ENSG00000251442	NA	LINC01094	1.93844	11.6408	0.000645198	0.0095932	1
ENSG00000138756	55589	BMP2K	1.68262	13.139	0.000289207	0.00478393	1
ENSG00000138670	153020	RASGEF1B	6.59578	52.3814	4.57032e-13	5.13541e-11	1
ENSG00000138642	55008	HERC6	1.50343	9.93406	0.00162248	0.020717	1
ENSG00000248713	285556	C4orf54	4.3556	19.1883	1.18436e-05	0.000294332	1
ENSG00000070190	27071	DAPP1	3.65819	11.9512	0.00054611	0.00835621	1
ENSG00000172403	171024	SYNPO2	1.69784	14.1979	0.000164557	0.00296524	1
ENSG00000251432	100507487	LINC02615	1.99425	9.08164	0.00258188	0.0309099	1
ENSG00000077684	79960	JADE1	1.35751	8.67564	0.00322492	0.0373848	1
ENSG00000184139	100271209	RPL7AP28	7.68437	49.1628	2.35577e-12	2.36042e-10	1
ENSG00000183439	391712	TRIM61	2.00449	9.16537	0.00246637	0.0296852	1
ENSG00000052802	6307	MSMO1	1.32196	8.25124	0.00407243	0.045435	1
ENSG00000287544	NA		3.08179	12.3706	0.000436146	0.00688856	1
ENSG00000250131	NA	AGA-DT	2.50251	15.573	7.93788e-05	0.00157268	1
ENSG00000206077	653082	ZDHHC11B	3.26685	22.8489	1.75249e-06	5.49172e-05	1
ENSG00000188818	79844	ZDHHC11	3.02208	18.4356	1.75748e-05	0.000417627	1
ENSG00000169777	50834	TAS2R1	4.51334	38.5776	5.26181e-10	3.43703e-08	1
ENSG00000249781	285692	LINC02112	4.63825	21.4977	3.5425e-06	0.000101692	1
ENSG00000113100	1007	CDH9	8.36856	62.0544	3.34094e-15	5.65121e-13	1
ENSG00000250697	NA		3.7344	16.5717	4.68442e-05	0.000997166	1
ENSG00000113494	5618	PRLR	4.58875	55.5531	9.09688e-14	1.14482e-11	1
ENSG00000112972	3157	HMGCS1	1.76802	14.5387	0.000137313	0.00253529	1
ENSG00000251141	NA	MRPS30-DT	1.92978	11.4591	0.000711445	0.0104206	1
ENSG00000152684	53918	PELO	1.53635	11.0168	0.000902883	0.0127727	1
ENSG00000250961	NA	RMEL3	2.07588	13.2374	0.000274419	0.00458268	1
ENSG00000169067	345651	ACTBL2	4.85312	13.4807	0.000241033	0.00411246	1
ENSG00000164197	285671	RNF180	10.8869	122.554	1.74591e-28	2.74649e-25	1
ENSG00000186479	401190	RGS7BP	10.9384	124.432	6.77771e-29	1.33275e-25	1
ENSG00000157111	134285	TMEM171	2.41842	20.1726	7.07595e-06	0.000188027	1
ENSG00000145700	256006	ANKRD31	2.85548	18.905	1.37392e-05	0.000333023	1
ENSG00000113161	3156	HMGCR	1.66192	12.9195	0.000325173	0.00532288	1
ENSG00000164251	2150	F2RL1	2.41003	20.9479	4.71943e-06	0.000131401	1
ENSG00000113356	10622	POLR3G	2.19305	16.35	5.26558e-05	0.00110297	1
ENSG00000173221	2745	GLRX	1.82762	15.5742	7.9328e-05	0.00157268	1
ENSG00000251026	NA	NIHCOLE	7.71001	49.2301	2.27631e-12	2.29543e-10	1
ENSG00000164211	134429	STARD4	1.41495	9.08571	0.00257614	0.0308647	1
ENSG00000080709	3781	KCNN2	2.0033	15.7614	7.18555e-05	0.00144371	1
ENSG00000169570	285605	DTWD2	1.53194	9.05276	0.00262298	0.0312829	1
ENSG00000164404	2661	GDF9	2.57064	14.0841	0.000174816	0.00310903	1
ENSG00000145824	9547	CXCL14	4.06021	44.3754	2.71076e-11	2.22099e-09	1
ENSG00000245146	NA	MALINC1	2.272	16.5829	4.65689e-05	0.00099265	1
ENSG00000113070	1839	HBEGF	1.95622	13.4051	0.000250936	0.00426293	1
ENSG00000146001	54660	PCDHB18P	3.1307	31.4778	2.01735e-08	9.53001e-07	1
ENSG00000262096	NA	PCDHB19P	3.44096	30.4113	3.4949e-08	1.57984e-06	1
ENSG00000272070	NA		1.67615	8.55732	0.00344136	0.039429	1
ENSG00000262576	56111	PCDHGA4	2.78639	28.7223	8.35347e-08	3.46724e-06	1
ENSG00000253767	9708	PCDHGA8	2.26671	17.3964	3.03405e-05	0.000680865	1
ENSG00000276547	56101	PCDHGB5	5.24812	84.0754	4.76266e-20	2.0249e-17	1
ENSG00000261934	56107	PCDHGA9	2.09698	10.3564	0.00129029	0.0170568	1
ENSG00000253873	56105	PCDHGA11	2.97129	19.6919	9.09855e-06	0.00023349	1
ENSG00000248449	56120	PCDHGB8P	2.76782	12.7956	0.000347439	0.00561723	1
ENSG00000156453	5097	PCDH1	1.96346	12.0267	0.000524445	0.00807246	1
ENSG00000156463	153769	SH3RF2	2.96208	28.3004	1.03872e-07	4.18978e-06	1
ENSG00000156475	5521	PPP2R2B	3.87242	45.3596	1.63978e-11	1.37944e-09	1
ENSG00000171992	11346	SYNPO	1.33389	8.68743	0.00320411	0.0371924	1
ENSG00000213433	NA	RPLP1P6	1.93105	9.44053	0.00212242	0.0261455	1
ENSG00000254186	NA		7.05433	39.1717	3.88131e-10	2.5976e-08	1
ENSG00000040275	54908	SPDL1	1.3957	9.27391	0.00232441	0.0282358	1
ENSG00000134516	1794	DOCK2	5.15963	57.3621	3.62533e-14	5.13784e-12	1
ENSG00000145936	3779	KCNMB1	7.41976	44.6562	2.34854e-11	1.94447e-09	1
ENSG00000156427	8817	FGF18	3.26637	24.7638	6.48023e-07	2.27546e-05	1
ENSG00000113739	8614	STC2	1.41831	9.79376	0.00175105	0.0222322	1
ENSG00000146094	79930	DOK3	2.77814	21.6274	3.31083e-06	9.59165e-05	1
ENSG00000170542	5272	SERPINB9	2.91933	22.8284	1.77131e-06	5.53965e-05	1
ENSG00000260604	NA		3.94996	57.1489	4.04029e-14	5.50096e-12	1
ENSG00000197977	54898	ELOVL2	2.30115	10.7671	0.00103323	0.0143079	1
ENSG00000180537	221687	RNF182	1.65975	9.60799	0.00193732	0.0242258	1
ENSG00000172201	3400	ID4	1.96751	13.7054	0.000213841	0.00370886	1
ENSG00000146038	51473	DCDC2	2.57634	11.9138	0.000557196	0.00847703	1
ENSG00000187837	3006	H1-2	2.49744	21.8955	2.87915e-06	8.43426e-05	1
ENSG00000180596	8347	H2BC4	1.81197	9.59436	0.00195176	0.0243483	1
ENSG00000180573	8334	H2AC6	1.94333	15.6654	7.55939e-05	0.00150337	1
ENSG00000274290	8344	H2BC6	2.22321	12.183	0.00048227	0.00750404	1
ENSG00000273802	8339	H2BC8	2.88135	17.6747	2.62096e-05	0.000598409	1
ENSG00000275713	8345	H2BC9	2.55277	12.8235	0.000342292	0.00556259	1
ENSG00000158406	8365	H4C8	3.1154	26.6959	2.38132e-07	8.98333e-06	1
ENSG00000196787	8969	H2AC11	2.75171	23.4054	1.31213e-06	4.22107e-05	1
ENSG00000276180	8294	H4C9	2.43327	12.2755	0.000458947	0.00720529	1
ENSG00000278828	8357	H3C10	3.33157	22.1456	2.52738e-06	7.54424e-05	1
ENSG00000233822	8341	H2BC15	2.38454	14.6538	0.000129171	0.00240408	1
ENSG00000176933	NA	TOB2P1	2.09117	11.1824	0.00082575	0.0118305	1
ENSG00000232810	7124	TNF	7.71346	50.4236	1.23894e-12	1.29931e-10	1
ENSG00000204267	6891	TAP2	1.39017	8.78449	0.00303803	0.0355854	1
ENSG00000204248	1302	COL11A2	2.18224	15.5227	8.15204e-05	0.00160903	1
ENSG00000271754	NA		2.40195	13.1964	0.000280488	0.0046593	1
ENSG00000146221	202500	TCTE1	1.82888	8.73984	0.00311332	0.0363321	1
ENSG00000008196	7021	TFAP2B	5.78521	47.6559	5.08001e-12	4.70081e-10	1
ENSG00000225791	401264	TRAM2-AS1	1.51462	9.7346	0.00180831	0.0228854	1
ENSG00000137269	55227	LRRC1	1.40349	8.39699	0.00375843	0.0423828	1
ENSG00000112175	653	BMP5	8.23151	58.4029	2.13575e-14	3.13995e-12	1
ENSG00000146143	5558	PRIM2	1.39785	8.86516	0.00290666	0.034225	1
ENSG00000283453	100996481	PRIM2BP	4.48385	29.4817	5.64466e-08	2.43945e-06	1
ENSG00000188107	346007	EYS	3.77443	22.1657	2.50099e-06	7.4939e-05	1
ENSG00000227706	NA		4.62163	21.8153	3.00198e-06	8.73324e-05	1
ENSG00000235357	NA	LINC01621	4.2887	34.3382	4.63211e-09	2.54782e-07	1
ENSG00000260000	NA		1.84027	11.6343	0.00064745	0.0096176	1
ENSG00000152661	2697	GJA1	1.37375	9.46905	0.00208967	0.0258027	1
ENSG00000111907	7164	TPD52L1	2.347	23.6227	1.17197e-06	3.77792e-05	1
ENSG00000118514	64577	ALDH8A1	3.05029	19.0388	1.28087e-05	0.000315822	1
ENSG00000226571	NA		3.78804	28.6859	8.51231e-08	3.51462e-06	1
ENSG00000231426	100132735	FILNC1	2.30406	12.3396	0.000443441	0.00698975	1
ENSG00000287820	NA		6.06461	25.3452	4.79334e-07	1.70597e-05	1
ENSG00000236013	100507477	LINC02941	3.25593	27.1865	1.84748e-07	7.1407e-06	1
ENSG00000285875			2.03109	14.5228	0.000138474	0.00255074	1
ENSG00000217684	100271253	RPS3AP24	4.32731	10.4451	0.00122977	0.0164923	1
ENSG00000234147	NA		6.38404	29.7793	4.84127e-08	2.12839e-06	1
ENSG00000112414	57211	ADGRG6	2.96979	36.872	1.26144e-09	7.63222e-08	1
ENSG00000001036	2519	FUCA2	2.03758	19.0126	1.2986e-05	0.000319096	1
ENSG00000091844	26575	RGS17	2.24838	16.4404	5.0205e-05	0.00105726	1
ENSG00000120437	39	ACAT2	2.2004	20.2214	6.89762e-06	0.000183909	1
ENSG00000286826	NA		2.70229	12.9473	0.000320383	0.0052609	1
ENSG00000223485	101929484	LINC01615	1.84019	14.1759	0.000166485	0.00299515	1
ENSG00000226194	NA	LINC02519	1.9415	11.7755	0.000600169	0.00901744	1
ENSG00000197461	5154	PDGFA	1.54537	11.093	0.000866562	0.0123031	1
ENSG00000215018	340267	COL28A1	2.16477	15.2189	9.57417e-05	0.00185254	1
ENSG00000214960	729920	CRPPA	1.54268	8.44449	0.00366151	0.0414681	1
ENSG00000048052	9734	HDAC9	1.96928	15.3816	8.78381e-05	0.00172292	1
ENSG00000154678	5137	PDE1C	1.60761	12.2162	0.000473764	0.00740098	1
ENSG00000158683	168507	PKD1L1	5.29263	37.5396	8.95762e-10	5.63649e-08	1
ENSG00000136275	80099	PKD1L1-AS1	3.58575	42.1895	8.28423e-11	6.20568e-09	1
ENSG00000086730	7462	LAT2	2.17774	8.12926	0.00435564	0.0481508	1
ENSG00000106211	3315	HSPB1	1.26993	8.06474	0.00451349	0.0497909	1
ENSG00000006576	57157	PHTF2	1.42222	9.67898	0.00186388	0.0234566	1
ENSG00000075223	10512	SEMA3C	2.44435	27.2369	1.79993e-07	6.97405e-06	1
ENSG00000186472	27445	PCLO	2.77984	13.5488	0.000232444	0.0039832	1
ENSG00000153993	223117	SEMA3D	1.49431	10.3771	0.00127586	0.0169113	1
ENSG00000105784	154661	RUNDC3B	1.58819	9.11461	0.00253576	0.0304504	1
ENSG00000128564	7425	VGF	6.51111	31.2043	2.32253e-08	1.09062e-06	1
ENSG00000128606	10234	LRRC17	1.39541	8.37027	0.0038141	0.0428568	1
ENSG00000286013	NA		2.09386	11.3174	0.000767827	0.0111664	1
ENSG00000091137	5172	SLC26A4	2.53801	18.2957	1.89136e-05	0.000446071	1
ENSG00000279086	NA		2.60799	17.7751	2.48611e-05	0.000570102	1
ENSG00000135269	26136	TES	1.77085	11.7835	0.000597588	0.00899585	1
ENSG00000243243	NA		3.43351	27.3175	1.72638e-07	6.73889e-06	1
ENSG00000237813	NA		3.44027	29.1799	6.59599e-08	2.80437e-06	1
ENSG00000237870	102724434	LOC102724434	4.06786	41.6071	1.11585e-10	8.27993e-09	1
ENSG00000105971	858	CAV2	1.66326	13.4496	0.000245058	0.0041766	1
ENSG00000001626	1080	CFTR	3.57233	14.6975	0.000126217	0.0023609	1
ENSG00000106278	5803	PTPRZ1	6.45048	30.1329	4.0343e-08	1.80808e-06	1
ENSG00000230359	286016	TPI1P2	2.31436	12.6449	0.000376593	0.00605126	1
ENSG00000128510	51200	CPA4	2.27676	22.4466	2.16071e-06	6.59722e-05	1
ENSG00000233559	NA	LINC00513	1.75089	8.88469	0.00287571	0.033886	1
ENSG00000128567	5420	PODXL	3.42542	36.7647	1.33283e-09	8.00259e-08	1
ENSG00000257335	8972	MGAM	3.2831	36.5413	1.49466e-09	8.88712e-08	1
ENSG00000274752	28577	TRBV12-3	5.2543	30.4907	3.35466e-08	1.52081e-06	1
ENSG00000276953	28576	TRBV12-4	4.72854	56.6354	5.2458e-14	6.81998e-12	1
ENSG00000196511	27010	TPK1	2.77045	15.6872	7.47266e-05	0.00149178	1
ENSG00000181444	168544	ZNF467	2.83301	22.3379	2.2865e-06	6.93043e-05	1
ENSG00000197558	23145	SSPOP	3.7987	34.1638	5.06619e-09	2.77687e-07	1
ENSG00000106538	5919	RARRES2	4.50298	48.8131	2.81552e-12	2.80323e-10	1
ENSG00000244151	NA		2.04392	8.1401	0.00432969	0.0478976	1
ENSG00000273117	NA	INSIG1-DT	2.10535	13.8536	0.000197613	0.00345405	1
ENSG00000186480	3638	INSIG1	2.1487	20.9129	4.80646e-06	0.000133117	1
ENSG00000231419	154822	LINC00689	5.42794	18.5298	1.6727e-05	0.00039929	1
ENSG00000146950	357	SHROOM2	2.58302	22.9722	1.64363e-06	5.18154e-05	1
ENSG00000169933	9758	FRMPD4	3.16	33.9461	5.66601e-09	3.06296e-07	1
ENSG00000067992	5165	PDK3	3.44038	38.7446	4.83039e-10	3.17936e-08	1
ENSG00000198947	1756	DMD	1.42029	8.37923	0.00379534	0.0427071	1
ENSG00000147027	83604	TMEM47	1.49182	10.3631	0.00128562	0.0170094	1
ENSG00000147041	94122	SYTL5	3.19228	31.5568	1.93693e-08	9.2054e-07	1
ENSG00000221994	57232	ZNF630	1.94536	9.59569	0.00195034	0.0243483	1
ENSG00000102003	6855	SYP	1.90207	10.7643	0.00103477	0.0143166	1
ENSG00000068985	8712	PAGE1	7.11962	40.0545	2.46977e-10	1.72675e-08	1
ENSG00000196338	54413	NLGN3	1.70141	9.81209	0.00173368	0.0220831	1
ENSG00000215105	NA	TTC3P1	2.42722	22.2973	2.3353e-06	7.05116e-05	1
ENSG00000179083	286499	FAM133A	5.32949	50.2419	1.35912e-12	1.38833e-10	1
ENSG00000158164	11013	TMSB15A	1.97247	10.4043	0.00125721	0.0167593	1
ENSG00000197565	1288	COL4A6	1.96745	15.1644	9.85451e-05	0.00189977	1
ENSG00000077274	827	CAPN6	2.01352	8.48128	0.0035882	0.0408437	1
ENSG00000003096	90293	KLHL13	4.79281	37.0089	1.17594e-09	7.19795e-08	1
ENSG00000258545	101928969	RHOXF1-AS1	6.26917	28.6393	8.71962e-08	3.58142e-06	1
ENSG00000009694	10178	TENM1	10.6604	114.061	1.26361e-26	1.80708e-23	1
ENSG00000282815	100129520	TEX13C	6.75755	34.1181	5.18671e-09	2.83306e-07	1
ENSG00000227060	100506757	LINC00629	1.69834	8.75529	0.00308705	0.036079	1
ENSG00000170965	10761	PLAC1	2.8726	15.3989	8.70406e-05	0.00170941	1
ENSG00000184785	644538	SMIM10	1.934	15.3448	8.95649e-05	0.00175242	1
ENSG00000013619	10046	MAMLD1	1.67829	12.944	0.000320954	0.00526479	1
ENSG00000011677	2556	GABRA3	4.86929	30.9433	2.65679e-08	1.24018e-06	1
ENSG00000198930	158511	CSAG1	2.26877	11.6729	0.000634176	0.00944718	1
ENSG00000213401	4111	MAGEA12	6.09322	42.8338	5.95944e-11	4.61812e-09	1
ENSG00000197172	4105	MAGEA6	3.16278	14.9596	0.00010984	0.00209188	1
ENSG00000198910	3897	L1CAM	1.56073	12.0446	0.000519439	0.00802681	1
ENSG00000089820	393	ARHGAP4	1.96636	12.5016	0.000406614	0.00649386	1
ENSG00000282021	NA		2.39498	12.0396	0.000520831	0.00804042	1
ENSG00000249898	NA	MCPH1-AS1	2.42495	14.8052	0.000119208	0.00224314	1
ENSG00000251468	100422204	LOC100422204	2.73469	15.8311	6.92534e-05	0.00140283	1
ENSG00000185053	137868	SGCZ	5.13593	61.2475	5.03335e-15	8.3347e-13	1
ENSG00000129422	57509	MTUS1	1.96821	15.7249	7.32535e-05	0.0014661	1
ENSG00000287185	NA		1.68298	8.08193	0.00447088	0.0493901	1
ENSG00000215262	157855	KCNU1	2.20029	8.27401	0.00402165	0.0449323	1
ENSG00000279881	NA		1.94904	11.7146	0.000620125	0.00926419	1
ENSG00000288611	2831	NPBWR1	11.1964	128.787	7.55064e-30	2.8602e-26	1
ENSG00000198846	9760	TOX	1.52235	10.9095	0.000956731	0.0134378	1
ENSG00000165084	116328	C8orf34	3.02377	28.9109	7.57839e-08	3.16366e-06	1
ENSG00000254337	107986951	LOC107986951	2.65939	20.6562	5.49587e-06	0.000151074	1
ENSG00000253479	100505739	LINC01603	4.10387	20.8009	5.09596e-06	0.000140887	1
ENSG00000221947	389668	XKR9	2.57604	14.2944	0.000156328	0.00283644	1
ENSG00000104321	8989	TRPA1	2.87583	26.7335	2.33535e-07	8.8311e-06	1
ENSG00000164683	23462	HEY1	1.67063	10.1546	0.00143944	0.018776	1
ENSG00000076554	7163	TPD52	2.21914	19.0344	1.28382e-05	0.000316053	1
ENSG00000205189	65986	ZBTB10	2.52287	21.8144	3.00342e-06	8.73324e-05	1
ENSG00000170323	2167	FABP4	8.08458	87.3307	9.18125e-21	4.24795e-18	1
ENSG00000164695	92421	CHMP4C	2.36726	11.2309	0.000804465	0.0116208	1
ENSG00000176571	168975	CNBD1	6.87767	36.5089	1.51971e-09	8.98744e-08	1
ENSG00000253669	NA	GASAL1	1.6419	10.4235	0.0012442	0.0166467	1
ENSG00000254615			1.6318	9.9392	0.00161795	0.0206927	1
ENSG00000177570	401474	SAMD12	2.45214	26.276	2.9595e-07	1.09543e-05	1
ENSG00000281641	NA	SAMD12-AS1	3.40508	15.7451	7.24755e-05	0.00145237	1
ENSG00000168672	157638	LRATD2	1.68171	9.33769	0.00224488	0.0273754	1
ENSG00000107295	6456	SH3GL2	2.03551	17.3805	3.05941e-05	0.000684604	1
ENSG00000147883	1030	CDKN2B	1.39913	8.92862	0.00280736	0.0332299	1
ENSG00000276759	100506422	LOC100506422	5.54792	20.2124	6.93036e-06	0.000184469	1
ENSG00000107201	23586	RIGI	1.68313	12.7559	0.000354881	0.00572578	1
ENSG00000279489	NA		3.01365	11.8943	0.000563069	0.00855103	1
ENSG00000198467	7169	TPM2	1.27878	8.28007	0.00400825	0.0448143	1
ENSG00000196196	646962	HRCT1	2.32415	8.17845	0.00423909	0.047094	1
ENSG00000119125	9615	GDA	5.22967	91.7799	9.6875e-22	5.25497e-19	1
ENSG00000165091	117531	TMC1	3.35873	9.75333	0.00178998	0.0226899	1
ENSG00000165092	216	ALDH1A1	2.89455	31.6963	1.80267e-08	8.61938e-07	1
ENSG00000148053	4915	NTRK2	2.22763	21.2613	4.00751e-06	0.000113385	1
ENSG00000187764	10507	SEMA4D	3.17472	21.5809	3.39211e-06	9.79105e-05	1
ENSG00000030304	4593	MUSK	2.25092	10.0194	0.00154899	0.0199567	1
ENSG00000148154	7357	UGCG	1.89975	16.773	4.21292e-05	0.00091035	1
ENSG00000157653	257169	C9orf43	2.40984	14.6661	0.000128331	0.00239476	1
ENSG00000106852	26468	LHX6	8.62643	66.6604	3.22556e-16	6.7655e-14	1
ENSG00000165209	55342	STRBP	2.20208	17.0195	3.69975e-05	0.000810595	1
ENSG00000275329	NA		2.96628	14.9014	0.000113277	0.00214437	1
ENSG00000273066	NA		1.93778	9.5167	0.0020361	0.0252403	1
ENSG00000228544	100131193	CCDC183-AS1	1.93691	10.4797	0.00120694	0.0162415	1
ENSG00000185522	256329	LMNTD2	1.9612	12.4944	0.000408182	0.00649911	1
ENSG00000185507	3665	IRF7	1.60588	10.5669	0.00115133	0.0156675	1
ENSG00000181649	7262	PHLDA2	1.63218	12.3678	0.000436794	0.00689188	1
ENSG00000182261	338322	NLRP10	3.21783	28.4224	9.7529e-08	3.97469e-06	1
ENSG00000245522	440028	LINC02709	2.33513	17.7988	2.45536e-05	0.000563871	1
ENSG00000246273	283104	SBF2-AS1	2.80384	33.8013	6.1038e-09	3.26595e-07	1
ENSG00000133800	10894	LYVE1	4.1964	25.4181	4.61567e-07	1.65021e-05	1
ENSG00000110328	374378	GALNT18	3.09451	35.7319	2.26428e-09	1.29525e-07	1
ENSG00000110693	55553	SOX6	1.49197	9.97887	0.00158346	0.0203011	1
ENSG00000166689	144100	PLEKHA7	3.31012	29.8989	4.55171e-08	2.02841e-06	1
ENSG00000198168	258010	SVIP	1.53173	9.4598	0.00210023	0.0259128	1
ENSG00000187398	338645	LUZP2	5.93514	83.9131	5.17004e-20	2.14026e-17	1
ENSG00000254754	NA		2.48982	10.8287	0.000999394	0.0139555	1
ENSG00000176971	387758	FIBIN	1.8027	15.2871	9.23474e-05	0.00180015	1
ENSG00000121690	91614	DEPDC7	1.70688	11.0995	0.000863523	0.0122718	1
ENSG00000255521	100507144	CD44-DT	3.70036	25.899	3.59758e-07	1.30701e-05	1
ENSG00000175274	9537	TP53I11	1.38939	9.50203	0.00205244	0.0254228	1
ENSG00000110079	51338	MS4A4A	7.6595	51.3585	7.69493e-13	8.3482e-11	1
ENSG00000166926	245802	MS4A6E	10.7426	128.418	9.09097e-30	2.8602e-26	1
ENSG00000071203	54860	MS4A12	5.70496	21.327	3.8724e-06	0.000110157	1
ENSG00000162174	80150	ASRGL1	3.18772	13.2513	0.000272389	0.00455361	1
ENSG00000068976	5837	PYGM	2.78475	16.1166	5.95599e-05	0.0012377	1
ENSG00000149809	7108	TM7SF2	2.00379	14.81	0.000118904	0.00224009	1
ENSG00000197847	440044	SLC22A20P	2.17083	10.2858	0.00134061	0.0176331	1
ENSG00000173825	220359	TIGD3	4.47218	19.9026	8.14905e-06	0.000212945	1
ENSG00000179292	256472	TMEM151A	5.03674	33.5463	6.95877e-09	3.63682e-07	1
ENSG00000172893	1717	DHCR7	2.33611	24.3338	8.10054e-07	2.7642e-05	1
ENSG00000175567	7351	UCP2	1.41624	8.28816	0.00399044	0.0446469	1
ENSG00000137474	4647	MYO7A	3.76154	29.0994	6.8758e-08	2.91545e-06	1
ENSG00000165490	220042	DDIAS	1.48675	8.40026	0.00375167	0.0423368	1
ENSG00000150672	1740	DLG2	1.78912	8.29062	0.00398503	0.0446182	1
ENSG00000149201	60494	CCDC81	1.7016	11.0311	0.000895937	0.0126859	1
ENSG00000174804	8322	FZD4	2.08047	19.6388	9.35497e-06	0.00023929	1
ENSG00000165323	120114	FAT3	8.56775	97.3962	5.67557e-23	4.46412e-20	1
ENSG00000254506	NA		2.3718	14.1074	0.000172666	0.0030796	1
ENSG00000196611	4312	MMP1	2.522	29.2436	6.38278e-08	2.72847e-06	1
ENSG00000204397	114769	CARD16	1.8379	11.0441	0.000889722	0.0126092	1
ENSG00000110675	55531	ELMOD1	6.1192	26.4981	2.63795e-07	9.85305e-06	1
ENSG00000246100	NA	LINC00900	2.50515	19.8812	8.24071e-06	0.000214983	1
ENSG00000280143	NA		1.77777	9.99932	0.00156598	0.0201098	1
ENSG00000137699	23650	TRIM29	2.4748	13.1534	0.000286995	0.00475233	1
ENSG00000184232	220323	OAF	1.60022	12.0829	0.000508868	0.0078867	1
ENSG00000285825	105369547	CCDC15-DT	2.05747	11.3402	0.000758453	0.0110577	1
ENSG00000187686	NA	KRT18P59	2.47695	11.6995	0.000625154	0.00932161	1
ENSG00000067064	3422	IDI1	1.34515	8.50632	0.00353915	0.0403517	1
ENSG00000170525	5209	PFKFB3	1.53776	11.2096	0.000813731	0.0117152	1
ENSG00000123243	80760	ITIH5	6.62635	32.5883	1.13897e-08	5.68799e-07	1
ENSG00000285671	NA		5.82246	23.0774	1.55606e-06	4.93516e-05	1
ENSG00000169126	55130	ODAD2	1.55302	11.0045	0.000908908	0.0128464	1
ENSG00000150054	143098	MPP7	3.13956	32.3838	1.26535e-08	6.27927e-07	1
ENSG00000216937	79741	CCDC7	1.6501	8.59083	0.0033786	0.0388798	1
ENSG00000232004	399748	CAP1P2	1.8442	8.62359	0.00331837	0.0382707	1
ENSG00000165606	644168	DRGX	2.10443	10.3175	0.00131776	0.0173761	1
ENSG00000070748	1103	CHAT	5.20062	36.0929	1.88126e-09	1.09204e-07	1
ENSG00000231131	101928687,105378305	LNCAROD,LOC105378305	4.8701	14.1529	0.000168536	0.00302307	1
ENSG00000122873	55847	CISD1	1.41096	9.00446	0.00269322	0.0319992	1
ENSG00000228527	NA		4.05755	15.8727	6.77474e-05	0.00138228	1
ENSG00000165449	220963	SLC16A9	1.95562	10.8191	0.00100459	0.0139919	1
ENSG00000138311	22891	ZNF365	1.44796	8.68771	0.00320363	0.0371924	1
ENSG00000122862	5552	SRGN	1.42462	9.70116	0.00184152	0.0232682	1
ENSG00000099282	23555	TSPAN15	4.65622	33.2331	8.17483e-09	4.20256e-07	1
ENSG00000107742	9806	SPOCK2	2.19319	9.67574	0.00186717	0.0234673	1
ENSG00000122367	11155	LDB3	2.5897	19.0102	1.30024e-05	0.000319096	1
ENSG00000107796	59	ACTA2	2.61584	31.4901	2.00455e-08	9.49808e-07	1
ENSG00000119922	3433	IFIT2	1.53086	10.7742	0.00102927	0.0142656	1
ENSG00000119917	3437	IFIT3	1.55328	11.4038	0.000732939	0.0107155	1
ENSG00000185745	3434	IFIT1	2.20855	22.0765	2.62e-06	7.79117e-05	1
ENSG00000148677	27063	ANKRD1	4.06518	21.0978	4.36426e-06	0.000121943	1
ENSG00000119938	5507	PPP1R3C	2.25316	22.9623	1.65214e-06	5.19796e-05	1
ENSG00000268894	100128054	PLCE1-AS1	2.68656	12.1095	0.00050165	0.00778249	1
ENSG00000023839	1244	ABCC2	2.49268	18.4069	1.78407e-05	0.000423305	1
ENSG00000099194	6319	SCD	2.0044	19.1446	1.21179e-05	0.000300673	1
ENSG00000273143	NA	DUSP5-DT	2.36208	11.6028	0.000658523	0.00973612	1
ENSG00000148735	79949	PLEKHS1	3.49266	16.8707	4.00143e-05	0.000867228	1
ENSG00000151892	2674	GFRA1	5.30892	68.7904	1.09507e-16	2.65023e-14	1
ENSG00000151651	101	ADAM8	1.81077	10.0095	0.00155734	0.0200315	1
ENSG00000111247	10635	RAD51AP1	1.51255	9.25838	0.0023442	0.0283885	1
ENSG00000047617	57101	ANO2	3.18739	23.7463	1.09907e-06	3.60199e-05	1
ENSG00000111644	84519	ACRBP	4.05368	25.7447	3.89691e-07	1.4125e-05	1
ENSG00000089692	3902	LAG3	2.87739	20.4153	6.2329e-06	0.00016847	1
ENSG00000173391	4973	OLR1	5.47634	99.0718	2.43506e-23	2.0161e-20	1
ENSG00000165685	120939	TMEM52B	5.11887	36.5381	1.4971e-09	8.88712e-08	1
ENSG00000234498	387841	RPL13AP20	3.0204	25.3807	4.70614e-07	1.67874e-05	1
ENSG00000013588	9052	GPRC5A	1.64062	12.7633	0.000353487	0.00570915	1
ENSG00000111348	397	ARHGDIB	1.62678	8.77528	0.0030534	0.0357123	1
ENSG00000151490	5800	PTPRO	4.35381	10.1334	0.00145604	0.0189509	1
ENSG00000172572	5139	PDE3A	2.35139	24.03	9.4848e-07	3.16784e-05	1
ENSG00000111700	28234	SLCO1B3	5.43572	32.2547	1.35227e-08	6.64769e-07	1
ENSG00000084453	6579	SLCO1A2	4.34198	32.9374	9.5174e-09	4.81409e-07	1
ENSG00000060982	586	BCAT1	1.75111	14.7773	0.000120983	0.0022684	1
ENSG00000133687	83857	TMTC1	2.06627	19.5493	9.80343e-06	0.00024914	1
ENSG00000134297	51054	PLEKHA8P1	1.58345	9.03702	0.00264567	0.0314992	1
ENSG00000257261	NA	SLC38A4-AS1	1.91719	10.8279	0.0009998	0.0139555	1
ENSG00000139209	55089	SLC38A4	1.65964	12.399	0.000429566	0.00679146	1
ENSG00000276390	NA		2.8769	12.1335	0.000495249	0.00769077	1
ENSG00000181418	23109	DDN	3.02284	22.0109	2.71103e-06	8.00134e-05	1
ENSG00000186897	338761	C1QL4	2.09152	11.7107	0.000621422	0.00927476	1
ENSG00000167588	2819	GPD1	5.03188	26.493	2.64493e-07	9.85305e-06	1
ENSG00000170477	3851	KRT4	4.84985	63.406	1.68205e-15	3.04142e-13	1
ENSG00000111057	3875	KRT18	2.69481	33.0024	9.20442e-09	4.68591e-07	1
ENSG00000139626	3695	ITGB7	2.27482	9.31447	0.00227351	0.0276815	1
ENSG00000123338	3071	NCKAP1L	2.83431	8.72719	0.00313499	0.0365037	1
ENSG00000123329	64333	ARHGAP9	4.18998	16.413	5.09336e-05	0.00107117	1
ENSG00000111012	1594	CYP27B1	1.75541	8.74474	0.00310496	0.0362614	1
ENSG00000135407	10677	AVIL	1.61299	8.20893	0.00416848	0.0464079	1
ENSG00000198673	338811	TAFA2	3.79439	48.5219	3.26623e-12	3.15222e-10	1
ENSG00000111110	57460	PPM1H	1.95953	16.8338	4.08003e-05	0.000882846	1
ENSG00000127328	117177	RAB3IP	1.7788	10.6912	0.00107646	0.0147894	1
ENSG00000153233	5801	PTPRR	3.07472	14.0795	0.000175241	0.00310942	1
ENSG00000127324	7103	TSPAN8	5.9276	23.8765	1.0272e-06	3.40188e-05	1
ENSG00000251138	100507377	LINC02882	7.7629	76.8238	1.86909e-18	6.39189e-16	1
ENSG00000257219	105369848	LNCOG	2.44895	14.6521	0.000129289	0.00240408	1
ENSG00000175183	1466	CSRP2	2.11561	19.9191	8.07892e-06	0.000211871	1
ENSG00000165891	144455	E2F7	1.39963	8.54562	0.00346354	0.0396254	1
ENSG00000067798	89795	NAV3	1.33801	8.45324	0.00364393	0.0413584	1
ENSG00000165899	283310	OTOGL	5.52774	19.7614	8.77358e-06	0.000226629	1
ENSG00000139304	374462	PTPRQ	4.23885	57.2875	3.76539e-14	5.24189e-12	1
ENSG00000111052	8825	LIN7A	1.73544	13.7854	0.000204918	0.00355802	1
ENSG00000182050	25834	MGAT4C	7.9235	93.7138	3.64615e-22	2.29431e-19	1
ENSG00000257150	100132594	PGAM1P5	3.55166	24.3567	8.00494e-07	2.74348e-05	1
ENSG00000227825	121456	SLC9A7P1	2.01965	12.9903	0.000313115	0.00514693	1
ENSG00000257642	105369954	C12orf75-AS1	2.35806	15.8084	7.00897e-05	0.00141538	1
ENSG00000074590	9891	NUAK1	1.81326	15.3394	8.98238e-05	0.0017553	1
ENSG00000110921	4598	MVK	1.5148	9.5343	0.00201667	0.0250784	1
ENSG00000258240	105369980	LINC01404	2.79302	16.1081	5.9827e-05	0.00124161	1
ENSG00000089127	4938	OAS1	2.59036	25.9388	3.52409e-07	1.28327e-05	1
ENSG00000111331	4940	OAS3	1.41838	9.54246	0.00200773	0.024987	1
ENSG00000111335	4939	OAS2	2.30916	22.7222	1.87194e-06	5.8312e-05	1
ENSG00000135119	84900	RNFT2	1.85742	10.1329	0.00145646	0.0189509	1
ENSG00000171435	283455	KSR2	5.65979	21.4764	3.58213e-06	0.000102642	1
ENSG00000135114	8638	OASL	2.81544	19.0937	1.24455e-05	0.00030783	1
ENSG00000274292	NA		2.2716	11.2193	0.00080952	0.0116831	1
ENSG00000176383	79369	B3GNT4	2.30966	11.9711	0.000540308	0.0082842	1
ENSG00000111452	283383	ADGRD1	6.60917	69.3397	8.28854e-17	2.10302e-14	1
ENSG00000102678	2254	FGF9	8.27154	58.8571	1.69547e-14	2.58946e-12	1
ENSG00000276476	100506622	LINC00540	8.44261	63.488	1.61349e-15	2.95138e-13	1
ENSG00000232977	100506697	LINC00327	2.41621	22.2083	2.44614e-06	7.34357e-05	1
ENSG00000236444	171222	UBE2L5	2.1418	10.5418	0.00116704	0.0158379	1
ENSG00000275226	400121	LINC00547	4.97685	14.8406	0.000116991	0.00220935	1
ENSG00000133110	10631	POSTN	3.12984	43.3432	4.59333e-11	3.61288e-09	1
ENSG00000287996	124903236	LOC124903236	6.96418	37.804	7.82224e-10	4.98185e-08	1
ENSG00000227674	144766	LINC00355	11.4699	137.234	1.0717e-31	5.61965e-28	1
ENSG00000237849	NA	NFYAP1	7.80044	51.1096	8.73499e-13	9.34763e-11	1
ENSG00000214269	NA	LGMNP1	2.46286	10.0773	0.00150109	0.0194585	1
ENSG00000184226	5101	PCDH9	9.03122	123.088	1.33428e-28	2.33217e-25	1
ENSG00000102471	54602	NDFIP2	1.45115	10.0561	0.00151845	0.0196276	1
ENSG00000178235	114798	SLITRK1	1.76134	9.80091	0.00174426	0.0221743	1
ENSG00000228824	642345	MIR4500HG	7.3636	43.8331	3.5761e-11	2.84119e-09	1
ENSG00000165300	26050	SLITRK5	9.20673	78.5624	7.75101e-19	2.77291e-16	1
ENSG00000272046	NA		6.18627	26.8698	2.17638e-07	8.28975e-06	1
ENSG00000225530	NA	SP3P	6.69511	33.6823	6.48893e-09	3.43695e-07	1
ENSG00000169508	1880	GPR183	3.68035	24.5125	7.38288e-07	2.55253e-05	1
ENSG00000102452	259232	NALCN	2.4919	22.4777	2.12597e-06	6.50654e-05	1
ENSG00000204442	728215	NALF1	6.90881	69.1231	9.2507e-17	2.30989e-14	1
ENSG00000275216	NA		4.11186	15.9568	6.4803e-05	0.00133083	1
ENSG00000229373	643365	LINC00452	3.80385	29.0286	7.13185e-08	2.99976e-06	1
ENSG00000198805	4860	PNP	1.61628	10.7244	0.00105733	0.0145775	1
ENSG00000232070	643382	TMEM253	1.93485	10.7032	0.00106952	0.0147197	1
ENSG00000139890	161253	REM2	1.89924	8.95183	0.00277192	0.0328847	1
ENSG00000129474	84962	AJUBA	1.33122	8.53469	0.0034844	0.0398351	1
ENSG00000259529	NA		2.16769	8.68639	0.00320596	0.0371924	1
ENSG00000092295	7051	TGM1	2.1362	12.5612	0.000393845	0.00630914	1
ENSG00000168952	29091	STXBP6	1.8866	16.0531	6.159e-05	0.00127415	1
ENSG00000198807	5083	PAX9	1.79541	9.59967	0.00194612	0.0243165	1
ENSG00000259091	400208	LINC00517	1.95803	14.0346	0.000179474	0.00317226	1
ENSG00000139874	6751	SSTR1	1.79322	15.2715	9.31122e-05	0.00180833	1
ENSG00000189139	84075	FSCB	8.72517	68.8678	1.05292e-16	2.58804e-14	1
ENSG00000258747	105370473	LOC105370473	7.39394	44.0632	3.17937e-11	2.55177e-09	1
ENSG00000273888			1.6319	8.52155	0.00350965	0.0400946	1
ENSG00000139970	6252	RTN1	6.31439	67.861	1.75433e-16	4.05844e-14	1
ENSG00000258667	105370526	HIF1A-AS3	4.12348	21.5963	3.36502e-06	9.73072e-05	1
ENSG00000139973	83851	SYT16	3.37545	36.8355	1.28528e-09	7.74662e-08	1
ENSG00000054690	57475	PLEKHH1	2.9684	15.6769	7.51382e-05	0.0014981	1
ENSG00000133985	23508	TTC9	1.81801	8.44527	0.00365994	0.0414681	1
ENSG00000205683	8110	DPF3	1.93013	13.8352	0.000199562	0.00348039	1
ENSG00000021645	9369	NRXN3	3.07931	37.0544	1.14877e-09	7.05912e-08	1
ENSG00000211448	1734	DIO2	2.18561	20.9429	4.73177e-06	0.000131511	1
ENSG00000275198	NA	LINC02960	3.09648	22.9866	1.63135e-06	5.15318e-05	1
ENSG00000165949	3429	IFI27	3.09133	27.007	2.02719e-07	7.79698e-06	1
ENSG00000188488	5104	SERPINA5	3.72609	19.5568	9.76529e-06	0.000248572	1
ENSG00000258927	NA		7.19055	41.1986	1.37523e-10	9.87844e-09	1
ENSG00000270038	NA		6.18256	26.8126	2.24169e-07	8.51786e-06	1
ENSG00000187621	124903372	LOC124903372	6.09924	43.0319	5.38549e-11	4.19401e-09	1
ENSG00000179455	7681	MKRN3	5.05307	38.5287	5.39535e-10	3.5072e-08	1
ENSG00000159251	70	ACTC1	3.90264	51.4807	7.23058e-13	7.89891e-11	1
ENSG00000172575	10125	RASGRP1	2.08922	15.4041	8.68019e-05	0.00170685	1
ENSG00000259345	NA		3.40416	31.8765	1.64295e-08	7.95236e-07	1
ENSG00000276107	NA	THBS1-IT1	3.27047	36.4105	1.5984e-09	9.41737e-08	1
ENSG00000140323	85455	DISP2	1.90457	12.1565	0.000489182	0.00760408	1
ENSG00000166145	6692	SPINT1	1.58642	8.36646	0.00382209	0.042916	1
ENSG00000137877	51332	SPTBN5	4.47277	46.7853	7.92043e-12	6.96069e-10	1
ENSG00000259705	105370809	FBN1-DT	1.79265	10.6068	0.00112675	0.0153996	1
ENSG00000140284	11001	SLC27A2	2.65152	12.3348	0.000444597	0.00699822	1
ENSG00000279145	NA		2.25649	15.2605	9.36552e-05	0.00181663	1
ENSG00000166035	3990	LIPC	2.02894	10.04	0.00153174	0.0197831	1
ENSG00000259370	105370854	LOC105370854	2.04034	14.5081	0.000139556	0.00256766	1
ENSG00000259727	NA		5.6737	36.2478	1.73752e-09	1.01989e-07	1
ENSG00000270964	NA	MAP2K5-DT	2.37846	9.6752	0.00186772	0.0234673	1
ENSG00000259426	145694	KIF23-AS1	1.66993	10.9362	0.000943058	0.0132695	1
ENSG00000274297	NA		2.29494	11.7379	0.000612389	0.00917476	1
ENSG00000269951	NA		2.55298	14.1286	0.000170728	0.00305197	1
ENSG00000058335	5923	RASGRF1	1.95885	9.80273	0.00174253	0.0221743	1
ENSG00000183496	84206	MEX3B	1.43749	8.44262	0.00366529	0.041481	1
ENSG00000140534	90381	TICRR	1.4765	8.27032	0.00402984	0.0449918	1
ENSG00000270127	NA		1.90127	8.3618	0.00383191	0.0429844	1
ENSG00000076344	8786	RGS11	1.57651	8.58475	0.00338989	0.0389785	1
ENSG00000167964	25837	RAB26	1.74507	9.45109	0.00211024	0.0260158	1
ENSG00000162078	124220	ZG16B	2.10196	9.33568	0.00224735	0.0273842	1
ENSG00000089486	29965	CDIP1	3.7289	36.7562	1.33862e-09	8.00675e-08	1
ENSG00000103184	9717	SEC14L5	3.1896	20.3305	6.51542e-06	0.000174905	1
ENSG00000133392	4629	MYH11	2.47256	13.198	0.000280252	0.0046593	1
ENSG00000183549	54988	ACSM5	2.30941	14.9111	0.000112701	0.0021386	1
ENSG00000198156	728741	NPIPB6	2.69094	11.1912	0.000821883	0.0117858	1
ENSG00000196502	6817	SULT1A1	3.84249	13.5809	0.000228497	0.00393269	1
ENSG00000149926	83723	TLCD3B	2.07111	10.2377	0.00137599	0.0180531	1
ENSG00000260740	NA		2.99296	17.6409	2.66787e-05	0.000608236	1
ENSG00000171208	81831	NETO2	1.90881	14.9988	0.00010758	0.00205382	1
ENSG00000102935	23090	ZNF423	2.20683	14.6394	0.000130162	0.00241744	1
ENSG00000246379	283856	GNAO1-DT	1.97764	10.2083	0.0013981	0.0182822	1
ENSG00000205336	9289	ADGRG1	2.24638	11.1779	0.000827774	0.0118487	1
ENSG00000102996	4324	MMP15	1.73616	10.3853	0.0012702	0.0168763	1
ENSG00000167261	64174	DPEP2	5.41545	18.7021	1.52814e-05	0.000367571	1
ENSG00000103056	55512	SMPD3	2.61656	15.7819	7.10792e-05	0.00143169	1
ENSG00000062038	1001	CDH3	2.33533	15.1604	9.87519e-05	0.00190143	1
ENSG00000039068	999	CDH1	3.57424	19.806	8.57137e-06	0.00022177	1
ENSG00000171724	57687	VAT1L	2.04035	18.8675	1.4012e-05	0.000339112	1
ENSG00000259867	NA	DYNLRB2-AS1	3.46918	10.3781	0.00127521	0.0169113	1
ENSG00000197943	5336	PLCG2	3.16064	23.8158	1.06009e-06	3.50343e-05	1
ENSG00000086696	3294	HSD17B2	2.39098	25.3122	4.87616e-07	1.73153e-05	1
ENSG00000268754	NA	LINC01081	2.60277	20.6931	5.39095e-06	0.00014852	1
ENSG00000270020	NA		4.0888	20.4668	6.06749e-06	0.000164282	1
ENSG00000278341	NA		1.80312	9.40362	0.00216558	0.026511	1
ENSG00000180422	283860	LINC00304	3.19552	20.5588	5.78273e-06	0.000157657	1
ENSG00000258947	10381	TUBB3	1.90715	13.4815	0.000240922	0.00411246	1
ENSG00000167703	124935	SLC43A2	1.72187	11.6103	0.000655884	0.00970622	1
ENSG00000108515	2027	ENO3	1.63654	10.5572	0.00115735	0.0157324	1
ENSG00000180626	84622	ZNF594	1.93971	13.5659	0.000230331	0.0039556	1
ENSG00000177294	162517	FBXO39	2.66332	15.4564	8.44296e-05	0.00166436	1
ENSG00000125414	4620	MYH2	5.60655	20.515	5.91653e-06	0.000160748	1
ENSG00000266709	84815	MGC12916	2.40754	17.2524	3.27282e-05	0.000727185	1
ENSG00000187688	51393	TRPV2	1.7786	10.276	0.00134773	0.0177119	1
ENSG00000034152	5606	MAP2K3	1.36083	8.83755	0.00295095	0.0346666	1
ENSG00000109072	7448	VTN	3.27081	26.5668	2.5458e-07	9.53524e-06	1
ENSG00000179761	51268	PIPOX	1.88654	11.6124	0.000655124	0.00970622	1
ENSG00000271503	6352	CCL5	2.76753	20.5595	5.78053e-06	0.000157657	1
ENSG00000141738	2886	GRB7	2.46595	10.5691	0.00114996	0.0156674	1
ENSG00000221852	83895	KRTAP1-5	3.7597	53.7567	2.26922e-13	2.70432e-11	1
ENSG00000212724	730755	KRTAP2-3	4.50573	41.8182	1.00165e-10	7.46778e-09	1
ENSG00000173801	3728	JUP	2.04372	19.5457	9.82219e-06	0.000249214	1
ENSG00000187595	201181	ZNF385C	2.68937	14.0378	0.00017917	0.00317044	1
ENSG00000131480	314	AOC2	4.22143	46.916	7.40972e-12	6.58544e-10	1
ENSG00000131471	8639	AOC3	7.09598	73.9068	8.18952e-18	2.57659e-15	1
ENSG00000213373	388387	LINC00671	2.4531	17.3171	3.16324e-05	0.000704829	1
ENSG00000159217	10642	IGF2BP1	2.76477	19.3855	1.06816e-05	0.000267994	1
ENSG00000167105	162461	TMEM92	2.08032	10.5977	0.00113229	0.0154619	1
ENSG00000229980	400604	TOB1-AS1	2.32451	11.1755	0.000828842	0.0118532	1
ENSG00000261040	645638	WFDC21P	1.88747	14.1127	0.00017218	0.00307442	1
ENSG00000109062	9368	SLC9A3R1	1.39407	8.735	0.00312159	0.0364015	1
ENSG00000189159	51155	JPT1	1.50263	10.6596	0.00109502	0.0150312	1
ENSG00000092929	201294	UNC13D	3.12073	25.1772	5.22959e-07	1.85285e-05	1
ENSG00000178404	100653515	CEP295NL	2.47804	11.25	0.000796245	0.0115338	1
ENSG00000279692	NA		2.83768	22.5429	2.05503e-06	6.32634e-05	1
ENSG00000229848	NA		2.58833	16.0138	6.28808e-05	0.00129813	1
ENSG00000186765	25794	FSCN2	2.33431	17.2119	3.34333e-05	0.000739717	1
ENSG00000169710	2194	FASN	1.45439	10.3508	0.00129417	0.0170937	1
ENSG00000141433	116	ADCYAP1	4.33772	23.7907	1.07401e-06	3.53457e-05	1
ENSG00000263551	NA		6.34737	29.0604	7.01574e-08	2.95884e-06	1
ENSG00000272788	NA		2.397	12.4611	0.00041552	0.00660258	1
ENSG00000264876	NA		2.10816	9.96841	0.00159249	0.0204002	1
ENSG00000267069	NA		2.20804	11.6104	0.000655858	0.00970622	1
ENSG00000180777	374860	ANKRD30B	5.69152	21.307	3.91307e-06	0.000111113	1
ENSG00000141449	80000	GREB1L	1.93822	15.1203	0.000100873	0.00193753	1
ENSG00000265485	729950	LINC01915	4.90957	62.6807	2.43085e-15	4.20217e-13	1
ENSG00000266573	NA		5.42935	63.5706	1.54721e-15	2.86343e-13	1
ENSG00000153391	125476	INO80C	1.50446	8.14775	0.00431147	0.0477661	1
ENSG00000101638	29906	ST8SIA5	2.70533	9.14932	0.0024881	0.0299009	1
ENSG00000267761	110175910	MIR4527HG	8.85712	71.862	2.30791e-17	6.25961e-15	1
ENSG00000267156	NA	TPMTP1	3.24293	14.3034	0.00015558	0.00282613	1
ENSG00000172361	220136	CFAP53	1.67315	8.64552	0.00327867	0.0378684	1
ENSG00000041353	5874	RAB27B	1.53325	8.40595	0.00373995	0.0422349	1
ENSG00000206129	642484	LOC642484	2.063	11.2794	0.00078372	0.0113629	1
ENSG00000287248	NA		1.65003	8.44706	0.00365634	0.0414681	1
ENSG00000267399	NA		3.61779	11.872	0.000569828	0.00863581	1
ENSG00000119547	9480	ONECUT2	2.52834	13.0466	0.000303839	0.00500873	1
ENSG00000278703	NA		2.07885	9.27124	0.00232781	0.0282552	1
ENSG00000081923	5205	ATP8B1	1.78158	15.061	0.000104091	0.00198962	1
ENSG00000166603	4160	MC4R	4.29363	10.174	0.00142432	0.0185942	1
ENSG00000166396	8710	SERPINB7	1.92834	15.7611	7.18669e-05	0.00144371	1
ENSG00000197632	5055	SERPINB2	2.55397	23.9972	9.64769e-07	3.21542e-05	1
ENSG00000242550	5273	SERPINB10	4.3161	37.4565	9.34742e-10	5.85834e-08	1
ENSG00000101333	5332	PLCB4	1.82186	14.6299	0.000130825	0.0024269	1
ENSG00000089177	55614	KIF16B	2.68457	25.082	5.49434e-07	1.94228e-05	1
ENSG00000101057	4605	MYBL2	1.3907	8.89339	0.00286205	0.033801	1
ENSG00000227477	100505826	STK4-DT	2.57346	12.2084	0.000475739	0.00740976	1
ENSG00000124116	140686	WFDC3	2.48605	13.6889	0.000215721	0.00373734	1
ENSG00000087589	57091	CASS4	2.91964	18.6914	1.53671e-05	0.000368505	1
ENSG00000099812	126353	MISP	5.21932	44.4206	2.64887e-11	2.18164e-09	1
ENSG00000267530	107985343	LINC01836	2.09614	13.8605	0.000196897	0.00344537	1
ENSG00000116032	116444	GRIN3B	2.25994	17.2468	3.28249e-05	0.000728306	1
ENSG00000099617	1943	EFNA2	5.04127	33.6165	6.71218e-09	3.53141e-07	1
ENSG00000267073	NA		3.60275	14.9517	0.000110298	0.00209806	1
ENSG00000104899	268	AMH	1.81213	12.2107	0.000475167	0.00740976	1
ENSG00000176490	148252	DIRAS1	1.68041	10.2255	0.00138512	0.0181426	1
ENSG00000261342	NA		2.11888	14.1412	0.000169584	0.00303496	1
ENSG00000089847	170961	ANKRD24	1.94344	11.7619	0.000604542	0.00907448	1
ENSG00000212123	163154	PRR22	2.07711	10.5224	0.00117933	0.0159657	1
ENSG00000125657	8744	TNFSF9	1.70974	9.36087	0.00221667	0.0270523	1
ENSG00000080573	50509	COL5A3	1.732	14.377	0.000149619	0.00273047	1
ENSG00000130164	3949	LDLR	1.57253	11.6658	0.0006366	0.00947431	1
ENSG00000072954	79041	TMEM38A	2.28586	17.4438	2.95929e-05	0.000666941	1
ENSG00000130303	684	BST2	1.58946	10.7264	0.0010562	0.0145746	1
ENSG00000105664	1311	COMP	2.50072	24.4939	7.45452e-07	2.57165e-05	1
ENSG00000213988	7643	ZNF90	2.2583	12.2275	0.000470907	0.00736365	1
ENSG00000269839	NA		5.19796	16.5585	4.71716e-05	0.00100278	1
ENSG00000267886	NA		3.40059	17.384	3.05392e-05	0.000684349	1
ENSG00000167232	7644	ZNF91	1.43497	9.07831	0.0025866	0.0309428	1
ENSG00000269416	104472717	LINC01224	3.93159	40.2015	2.2907e-10	1.60871e-08	1
ENSG00000269289	100505851	LOC100505851	1.79657	11.8679	0.000571112	0.00863861	1
ENSG00000186326	388531	RGS9BP	2.47125	9.96064	0.00159922	0.0204698	1
ENSG00000181007	284406	ZFP82	1.86409	12.8062	0.00034548	0.0055913	1
ENSG00000104814	11184	MAP4K1	4.18004	31.3815	2.1199e-08	9.98445e-07	1
ENSG00000167600	29785	CYP2S1	5.93456	40.5275	1.93867e-10	1.37375e-08	1
ENSG00000105737	2901	GRIK5	4.2953	36.9878	1.18871e-09	7.2199e-08	1
ENSG00000167619	284339	TMEM145	2.679	16.7319	4.3051e-05	0.000927719	1
ENSG00000124467	440533	PSG8	4.17671	17.0153	3.70789e-05	0.00081125	1
ENSG00000231924	5669	PSG1	4.12323	42.4969	7.0793e-11	5.35406e-09	1
ENSG00000170848	5675	PSG6	4.76003	32.1975	1.39272e-08	6.78295e-07	1
ENSG00000282943	NA		2.16335	10.4028	0.00125827	0.0167593	1
ENSG00000242221	5670	PSG2	4.55555	33.4937	7.1497e-09	3.72424e-07	1
ENSG00000243137	5672	PSG4	2.19116	10.4098	0.00125351	0.0167393	1
ENSG00000241104	284344	LOC284344	5.9484	58.702	1.83452e-14	2.77488e-12	1
ENSG00000183668	5678	PSG9	2.56575	20.283	6.67921e-06	0.000178996	1
ENSG00000204936	57126	CD177	2.70653	15.9926	6.35902e-05	0.00130763	1
ENSG00000159915	353355	ZNF233	2.90485	20.4709	6.05462e-06	0.000164216	1
ENSG00000105479	93233	ODAD1	2.27548	9.43281	0.00213137	0.0262147	1
ENSG00000142552	57333	RCN3	2.38547	24.3465	8.04735e-07	2.75202e-05	1
ENSG00000224420	199800	ADM5	1.73778	8.38215	0.00378924	0.0426689	1
ENSG00000180279	284365	LINC01869	2.67893	13.3238	0.000262058	0.00440431	1
ENSG00000187474	2359	FPR3	2.08752	11.2446	0.000798562	0.0115567	1
ENSG00000242779	79986	ZNF702P	2.14133	16.4744	4.93125e-05	0.00103986	1
ENSG00000126583	5582	PRKCG	5.17849	28.575	9.01372e-08	3.68298e-06	1
ENSG00000142408	59283	CACNG8	2.14575	13.8854	0.000194297	0.00340926	1
ENSG00000095752	3589	IL11	1.4798	9.8593	0.00168975	0.0215409	1
ENSG00000267216	108903150	ZNF8-ERVK3-1	2.6862	18.0834	2.11437e-05	0.000489855	1
ENSG00000236718	NA	RBMY2QP	7.43087	44.919	2.05355e-11	1.70923e-09	1
ENSG00000206159	352887	GYG2P1	2.43276	14.2703	0.000158346	0.00286645	1
ENSG00000237438	NA	CECR7	3.52578	41.525	1.16376e-10	8.59488e-09	1
ENSG00000273203	NA		4.10627	31.7914	1.71654e-08	8.28307e-07	1
ENSG00000184979	11274	USP18	1.72015	10.9654	0.000928308	0.0130853	1
ENSG00000040608	65078	RTN4R	2.63597	14.1747	0.000166598	0.00299515	1
ENSG00000226287	84222	TMEM191A	1.891	10.5794	0.00114355	0.015602	1
ENSG00000169668	400892	BCRP2	4.96845	14.795	0.000119852	0.00225255	1
ENSG00000128242	9514	GAL3ST1	3.47281	21.1826	4.17542e-06	0.000117502	1
ENSG00000185133	27124	INPP5J	2.18004	14.6557	0.000129045	0.00240408	1
ENSG00000205853	10737	RFPL3S	2.54071	11.9496	0.000546598	0.00835621	1
ENSG00000185666	8224	SYN3	3.34536	19.7286	8.92573e-06	0.000230181	1
ENSG00000179750	9582	APOBEC3B	1.66539	10.5152	0.00118397	0.0160146	1
ENSG00000100311	5155	PDGFB	6.20028	72.0245	2.12541e-17	5.97051e-15	1
ENSG00000100147	79879	CCDC134	1.64822	8.94987	0.00277489	0.0328902	1
ENSG00000184068	NA	SREBF2-AS1	2.51975	11.5131	0.000691062	0.0101504	1
ENSG00000254413	386593	CHKB-CPT1B	3.33952	19.3539	1.08596e-05	0.000272027	1
ENSG00000205559	100144603	CHKB-DT	1.81291	9.41375	0.00215364	0.026406	1
ENSG00000008735	23542	MAPK8IP2	4.20623	50.2508	1.35301e-12	1.38833e-10	1
ENSG00000275993	102724428	LOC102724428	1.83942	11.0629	0.000880706	0.0124927	1
ENSG00000237484	105372751	LINC01684	7.47907	45.4495	1.56624e-11	1.32465e-09	1
ENSG00000223870	NA		7.25686	65.9037	4.73491e-16	9.80064e-14	1
ENSG00000222042	NA		5.92774	24.1356	8.97868e-07	3.01803e-05	1
ENSG00000154736	11096	ADAMTS5	3.10577	39.7351	2.90858e-10	1.98073e-08	1
ENSG00000236532	101927973	LINC01695	3.85735	27.3547	1.69356e-07	6.64374e-06	1
ENSG00000232855	NA		1.64594	10.6178	0.00112004	0.0153211	1
ENSG00000226935	118421	LINC00161	3.50088	22.9465	1.66573e-06	5.23026e-05	1
ENSG00000183486	4600	MX2	1.35878	8.47044	0.00360965	0.0409988	1
ENSG00000183421	54101	RIPK4	2.45561	13.0905	0.000296804	0.00490444	1
ENSG00000237232	150142	ZNF295-AS1	2.25138	15.674	7.52504e-05	0.00149844	1
ENSG00000142178	150094	SIK1	2.12334	11.3316	0.000762004	0.0110991	1
ENSG00000142185	7226	TRPM2	2.97554	14.1584	0.000168045	0.00301771	1
ENSG00000197381	104	ADARB1	1.43297	8.88859	0.00286958	0.0338391	1
ENSG00000286886	NA		5.85986	23.0655	1.56572e-06	4.95581e-05	1
ENSG00000227232	NA	WASH7P	0.44639	0.553263	0.456987	0.792122	0
ENSG00000279457	NA	WASH9P	0.328602	0.334356	0.563105	0.834028	0
ENSG00000225630	100652939	MTND2P28	0.399131	0.760177	0.383273	0.754744	0
ENSG00000237973	107075141	MTCO1P12	-0.192253	0.150833	0.697741	0.884368	0
ENSG00000229344	107075310	MTCO2P12	0.893648	2.10309	0.147002	0.555328	0
ENSG00000248527	106480796	MTATP6P1	0.287967	0.415257	0.519313	0.81908	0
ENSG00000198744	107075270	MTCO3P12	0.140257	0.0480936	0.826414	0.935014	0
ENSG00000228327	NA		-0.0967107	0.026828	0.869895	0.952413	0
ENSG00000230092	NA		-0.205006	0.0948901	0.75805	0.908217	0
ENSG00000228794	643837	LINC01128	0.881207	3.36074	0.0667682	0.362683	0
ENSG00000230699	NA		0.744024	1.45464	0.227785	0.6586	0
ENSG00000223764	100130417	LINC02593	-0.0260511	0.00266379	0.958838	0.987358	0
ENSG00000187634	148398	SAMD11	-0.42608	0.846268	0.35761	0.742163	0
ENSG00000188976	26155	NOC2L	0.700725	2.41105	0.120482	0.505009	0
ENSG00000187961	339451	KLHL17	0.497943	0.987763	0.32029	0.719166	0
ENSG00000187583	84069	PLEKHN1	0.265159	0.259593	0.6104	0.851341	0
ENSG00000272512	NA		0.901835	1.85133	0.173629	0.597867	0
ENSG00000188290	57801	HES4	1.0554	4.59913	0.0319882	0.223548	0
ENSG00000131591	54991	C1orf159	0.16007	0.103595	0.747557	0.904558	0
ENSG00000078808	51150	SDF4	-0.0603895	0.0185599	0.891636	0.962347	0
ENSG00000176022	126792	B3GALT6	-0.475901	1.06786	0.30143	0.704994	0
ENSG00000160087	118424	UBE2J2	0.0278362	0.00374524	0.951201	0.984325	0
ENSG00000230415	NA	LINC01786	-0.0426319	0.00456577	0.946128	0.982214	0
ENSG00000162572	6339	SCNN1D	-0.269621	0.261697	0.608957	0.850452	0
ENSG00000131584	116983	ACAP3	0.523374	1.3114	0.252141	0.674449	0
ENSG00000169972	126789	PUSL1	0.137907	0.0827186	0.773647	0.913565	0
ENSG00000127054	54973	INTS11	0.385533	0.721819	0.395548	0.763813	0
ENSG00000240731	NA		-0.81448	1.45805	0.227241	0.658001	0
ENSG00000224051	80772	CPTP	0.0680348	0.0212961	0.883975	0.959684	0
ENSG00000169962	83756	TAS1R3	0.0352993	0.0029011	0.957045	0.986646	0
ENSG00000107404	1855	DVL1	0.0118926	0.000694368	0.978977	0.994466	0
ENSG00000162576	54587	MXRA8	0.325145	0.544878	0.460418	0.793505	0
ENSG00000175756	54998	AURKAIP1	0.256843	0.317403	0.573173	0.836897	0
ENSG00000221978	81669	CCNL2	-0.118426	0.0659912	0.797266	0.923548	0
ENSG00000224870	148413	MRPL20-AS1	0.500259	1.0544	0.304496	0.706603	0
ENSG00000242485	55052	MRPL20	0.0158345	0.00118375	0.972554	0.991471	0
ENSG00000272455	NA	MRPL20-DT	0.851473	2.24924	0.13368	0.532546	0
ENSG00000160072	83858	ATAD3B	0.138961	0.0810135	0.775929	0.914317	0
ENSG00000197785	55210	ATAD3A	0.633597	1.85691	0.172982	0.59675	0
ENSG00000205090	339453	TMEM240	-1.37303	6.59441	0.0102299	0.0958469	0
ENSG00000160075	29101	SSU72	0.354738	0.620981	0.430683	0.779501	0
ENSG00000215014	NA		1.27936	3.69172	0.0546832	0.319997	0
ENSG00000272106	NA		-0.188314	0.125766	0.722863	0.894105	0
ENSG00000197530	142678	MIB2	0.286193	0.391204	0.531667	0.823032	0
ENSG00000248333	984	CDK11B	0.490568	1.11754	0.290449	0.697565	0
ENSG00000189339	728661	SLC35E2B	0.0374328	0.00662039	0.935151	0.978236	0
ENSG00000008128	728642	CDK11A	0.340648	0.432531	0.51075	0.81563	0
ENSG00000268575	NA		0.155959	0.0768162	0.781659	0.916654	0
ENSG00000215790	NA	SLC35E2A	-0.084346	0.0343575	0.852949	0.945843	0
ENSG00000008130	65220	NADK	0.502489	1.21832	0.26969	0.68658	0
ENSG00000078369	2782	GNB1	0.455979	1.06649	0.301739	0.705221	0
ENSG00000178821	339456	TMEM52	-1.78326	6.45644	0.0110551	0.101879	0
ENSG00000067606	5590	PRKCZ	0.644682	1.19172	0.274982	0.68901	0
ENSG00000182873	100506504	PRKCZ-AS1	1.26988	5.57132	0.018257	0.148578	0
ENSG00000162585	199990	FAAP20	-0.114363	0.0627827	0.802151	0.92512	0
ENSG00000157933	6497	SKI	0.283282	0.406526	0.523738	0.820528	0
ENSG00000287356	NA		0.37238	0.398246	0.527997	0.82151	0
ENSG00000116151	79906	MORN1	0.48257	0.857447	0.354454	0.740199	0
ENSG00000269896	100129534	LOC100129534	1.16068	4.55701	0.0327843	0.227495	0
ENSG00000157916	11079	RER1	0.408792	0.830988	0.361987	0.745611	0
ENSG00000157911	5192	PEX10	-0.192419	0.168645	0.681319	0.877787	0
ENSG00000157881	55229	PANK4	0.162291	0.120295	0.728715	0.896685	0
ENSG00000238164	NA	TNFRSF14-AS1	2.04092	7.64017	0.00570826	0.0605915	0
ENSG00000157873	8764	TNFRSF14	-0.863887	2.99787	0.0833742	0.416236	0
ENSG00000157870	127281	PRXL2B	0.611731	1.74229	0.186849	0.614393	0
ENSG00000162591	1953	MEGF6	-0.806961	3.23683	0.0719999	0.381614	0
ENSG00000158109	127262	TPRG1L	0.378943	0.703921	0.401469	0.76561	0
ENSG00000116213	49856	WRAP73	0.533377	1.19479	0.274364	0.688691	0
ENSG00000130764	57470	LRRC47	0.384101	0.716894	0.397165	0.76398	0
ENSG00000116198	9731	CEP104	0.746684	2.62845	0.104964	0.47123	0
ENSG00000169598	1677	DFFB	0.302436	0.355676	0.550917	0.828891	0
ENSG00000198912	339448	C1orf174	0.285677	0.365076	0.545701	0.827991	0
ENSG00000131697	261734	NPHP4	0.121405	0.0633108	0.801338	0.924798	0
ENSG00000069424	8514	KCNAB2	0.653884	1.96469	0.161013	0.576838	0
ENSG00000116251	6146	RPL22	0.156861	0.121938	0.726942	0.895725	0
ENSG00000158286	388591	RNF207	-1.52648	8.01143	0.0046483	0.0511703	0
ENSG00000116237	23463	ICMT	0.599947	1.79492	0.180328	0.60627	0
ENSG00000158292	387509	GPR153	-0.785529	2.80129	0.0941887	0.447503	0
ENSG00000097021	11332	ACOT7	0.811482	3.11163	0.0777352	0.399173	0
ENSG00000215788	8718	TNFRSF25	0.289673	0.286172	0.592684	0.845133	0
ENSG00000171680	57449	PLEKHG5	0.0688067	0.0195965	0.88867	0.961614	0
ENSG00000162408	79707	NOL9	0.420248	0.795986	0.372296	0.751855	0
ENSG00000204859	3104	ZBTB48	0.22096	0.197655	0.65662	0.867316	0
ENSG00000116273	148479	PHF13	0.52684	1.34444	0.246253	0.67172	0
ENSG00000041988	90326	THAP3	0.020224	0.00172655	0.966856	0.98968	0
ENSG00000007923	55735	DNAJC11	0.474748	1.09124	0.296196	0.701727	0
ENSG00000171735	23261	CAMTA1	0.398986	0.744956	0.388078	0.757802	0
ENSG00000049245	9341	VAMP3	0.349478	0.610802	0.434486	0.781301	0
ENSG00000049246	8863	PER3	0.85428	3.47909	0.0621487	0.347535	0
ENSG00000116288	11315	PARK7	0.168197	0.140819	0.707469	0.887071	0
ENSG00000116285	54206	ERRFI1	-0.621046	1.79541	0.180269	0.606201	0
ENSG00000162426	50651	SLC45A1	-0.054796	0.0106482	0.917812	0.972899	0
ENSG00000142599	473	RERE	-0.045566	0.0102876	0.919211	0.97322	0
ENSG00000074800	2023	ENO1	0.815885	3.42933	0.0640482	0.354269	0
ENSG00000238249	NA	HMGN2P17	1.30808	4.286	0.0384275	0.256037	0
ENSG00000180758	80045	GPR157	0.772944	2.42066	0.119745	0.503089	0
ENSG00000049239	9563	H6PD	-0.670731	2.24474	0.134069	0.532814	0
ENSG00000171621	80176	SPSB1	0.696462	2.28643	0.13051	0.526493	0
ENSG00000284693	100506022	LINC02606	0.476963	0.800787	0.370858	0.750859	0
ENSG00000171612	84275	SLC25A33	0.832001	2.6465	0.103778	0.469856	0
ENSG00000188807	199953	TMEM201	0.269657	0.326163	0.567927	0.835116	0
ENSG00000171608	5293	PIK3CD	-0.350354	0.577911	0.447132	0.787454	0
ENSG00000171603	22883	CLSTN1	0.102732	0.0538975	0.816415	0.931372	0
ENSG00000178585	56998	CTNNBIP1	0.156589	0.112301	0.73754	0.900024	0
ENSG00000162441	84328	LZIC	0.0366281	0.00641169	0.936179	0.978281	0
ENSG00000173614	64802	NMNAT1	-0.0535032	0.0122062	0.912027	0.97057	0
ENSG00000130939	10277	UBE4B	0.0487428	0.0116781	0.913944	0.971249	0
ENSG00000054523	23095	KIF1B	0.505825	1.25468	0.26266	0.682259	0
ENSG00000142657	5226	PGD	0.687674	2.32557	0.127264	0.520674	0
ENSG00000175279	378708	CENPS	0.219159	0.162071	0.687256	0.879884	0
ENSG00000160049	1676	DFFA	-0.0701778	0.0240128	0.876852	0.95635	0
ENSG00000142655	5195	PEX14	0.265987	0.33059	0.565312	0.834476	0
ENSG00000130940	54897	CASZ1	-0.338433	0.213887	0.643737	0.862796	0
ENSG00000120948	23435	TARDBP	0.295798	0.430434	0.511776	0.816021	0
ENSG00000271895			0.25861	0.181652	0.669957	0.871864	0
ENSG00000116649	6723	SRM	0.215485	0.228374	0.632732	0.857027	0
ENSG00000171824	5394	EXOSC10	0.409956	0.817935	0.365785	0.747973	0
ENSG00000198793	2475	MTOR	0.706674	2.43333	0.11878	0.501215	0
ENSG00000120942	29914	UBIAD1	0.0773507	0.0271379	0.869152	0.952136	0
ENSG00000132879	93611	FBXO44	-0.595165	1.51311	0.218666	0.646685	0
ENSG00000116663	26270	FBXO6	-0.110589	0.0476342	0.827232	0.935259	0
ENSG00000116670	10459	MAD2L2	0.229576	0.243927	0.621384	0.852788	0
ENSG00000177674	57085	AGTRAP	-0.494132	1.02828	0.310562	0.711269	0
ENSG00000215910	284498	C1orf167	0.313577	0.138119	0.710158	0.888601	0
ENSG00000177000	4524	MTHFR	0.370067	0.637771	0.424519	0.775983	0
ENSG00000011021	1185	CLCN6	0.734574	2.43573	0.118598	0.50112	0
ENSG00000116685	90231	KIAA2013	0.257128	0.326287	0.567854	0.835116	0
ENSG00000083444	5351	PLOD1	0.0393606	0.00798281	0.928806	0.976022	0
ENSG00000116688	9927	MFN2	0.407231	0.821928	0.364617	0.746677	0
ENSG00000116691	60672	MIIP	0.716498	2.07607	0.149625	0.558954	0
ENSG00000048707	55187	VPS13D	0.286134	0.402044	0.526035	0.820824	0
ENSG00000116731	7799	PRDM2	0.778739	2.89826	0.088675	0.430672	0
ENSG00000189337	23254	KAZN	0.624092	1.73175	0.188187	0.615975	0
ENSG00000142634	79180	EFHD2	0.0932827	0.0426495	0.836387	0.93903	0
ENSG00000132906	842	CASP9	0.85626	3.03103	0.0816862	0.41107	0
ENSG00000116138	23341	DNAJC16	0.0504488	0.0116855	0.913917	0.971249	0
ENSG00000116771	79814	AGMAT	-0.474175	0.779676	0.37724	0.752922	0
ENSG00000197312	84301	DDI2	0.0366941	0.00629745	0.936749	0.978542	0
ENSG00000116786	23207	PLEKHM2	0.139178	0.0961292	0.756525	0.907496	0
ENSG00000162461	284723	SLC25A34	1.0446	3.27899	0.070172	0.374195	0
ENSG00000162458	54751	FBLIM1	-0.0130603	0.000860728	0.976595	0.993328	0
ENSG00000233954	440567	UQCRHL	0.322162	0.340539	0.559518	0.833067	0
ENSG00000178715	441876	RPS16P1	0.30566	0.228441	0.632683	0.857027	0
ENSG00000179743	729614	SPEN-AS1	0.993291	3.51269	0.0609006	0.343995	0
ENSG00000065526	23013	SPEN	0.440959	0.971134	0.324398	0.720777	0
ENSG00000116809	7709	ZBTB17	0.396798	0.730411	0.39275	0.7615	0
ENSG00000184908	1188	CLCNKB	0.0669225	0.00886423	0.92499	0.974801	0
ENSG00000185519	348487	FAM131C	1.42765	4.5274	0.0333563	0.230447	0
ENSG00000227959	NA	EPHA2-AS1	-0.155466	0.0573307	0.810766	0.928994	0
ENSG00000142632	128272	ARHGEF19	0.68124	1.88838	0.169385	0.591262	0
ENSG00000237276	NA	ANO7L1	0.45182	0.659829	0.41662	0.772543	0
ENSG00000288398	NA		-0.432411	0.715996	0.39746	0.764078	0
ENSG00000132881	79363	CPLANE2	-0.475571	0.796266	0.372212	0.751832	0
ENSG00000037637	54455	FBXO42	0.0887409	0.0374073	0.846638	0.943702	0
ENSG00000055070	26099	SZRD1	0.220806	0.246934	0.619243	0.851754	0
ENSG00000157191	55707	NECAP2	0.145809	0.104258	0.746779	0.904187	0
ENSG00000226029	107984921	LINC01772	0.572369	0.858221	0.354237	0.739942	0
ENSG00000080947	114819	CROCCP3	0.187443	0.117751	0.731487	0.897613	0
ENSG00000219481	55672	NBPF1	0.225688	0.22967	0.631768	0.856533	0
ENSG00000215908	84809	CROCCP2	0.428839	0.800273	0.371012	0.750859	0
ENSG00000236698	NA	EIF1AXP1	0.879155	2.05295	0.151912	0.56348	0
ENSG00000058453	9696	CROCC	0.254668	0.304498	0.581076	0.84	0
ENSG00000238142	105376805	LOC105376805	0.0549541	0.00991391	0.920687	0.973799	0
ENSG00000117122	4237	MFAP2	-0.692658	2.30867	0.128654	0.523532	0
ENSG00000286898	105376806	LOC105376806	-1.20206	3.18249	0.0744311	0.389151	0
ENSG00000159363	23400	ATP13A2	0.639847	1.89275	0.168893	0.590549	0
ENSG00000117118	6390	SDHB	0.752446	2.72348	0.098882	0.458806	0
ENSG00000179051	55920	RCC2	0.168916	0.14191	0.706389	0.886639	0
ENSG00000074964	55160	ARHGEF10L	0.00774313	0.000282548	0.986589	0.996087	0
ENSG00000159423	8659	ALDH4A1	1.28078	6.62632	0.0100483	0.0945639	0
ENSG00000169991	126917	IFFO2	0.996705	4.63438	0.0313375	0.220569	0
ENSG00000272084	NA		1.32039	3.97329	0.0462274	0.287651	0
ENSG00000127481	23352	UBR4	0.30175	0.463121	0.496169	0.808318	0
ENSG00000230424	101927895	EMC1-AS1	-0.643127	1.28684	0.256631	0.677935	0
ENSG00000127463	23065	EMC1	0.213397	0.226446	0.634172	0.857536	0
ENSG00000053372	51154	MRTO4	0.184905	0.16398	0.685518	0.879884	0
ENSG00000053371	8574	AKR7A2	0.070781	0.023997	0.876893	0.95635	0
ENSG00000040487	54896	SLC66A1	0.252407	0.276872	0.598759	0.847649	0
ENSG00000077549	832	CAPZB	0.36125	0.668385	0.413615	0.771199	0
ENSG00000173436	440574	MICOS10	0.0658087	0.018736	0.891126	0.962227	0
ENSG00000158747	4681,100532736	NBL1,MICOS10-NBL1	-0.737068	2.72871	0.098559	0.458186	0
ENSG00000226396	NA		0.0264235	0.00263067	0.959094	0.987403	0
ENSG00000162542	255104	TMCO4	0.312302	0.463067	0.496194	0.808318	0
ENSG00000169914	23252	OTUD3	0.626409	1.68571	0.194167	0.620759	0
ENSG00000162545	55450	CAMK2N1	0.98582	4.85803	0.0275177	0.202565	0
ENSG00000090432	79594	MUL1	0.166228	0.13263	0.715721	0.890579	0
ENSG00000158828	65018	PINK1	0.67888	2.27204	0.131727	0.528756	0
ENSG00000117242	100861548	PINK1-AS	-0.0428469	0.00801264	0.928674	0.975948	0
ENSG00000244038	1650	DDOST	0.177865	0.161467	0.68781	0.879884	0
ENSG00000117245	57576	KIF17	0.719717	1.59296	0.206903	0.633845	0
ENSG00000127483	50809	HP1BP3	0.41283	0.864757	0.352411	0.738961	0
ENSG00000075151	8672	EIF4G3	0.395279	0.776696	0.378153	0.753346	0
ENSG00000117298	1889	ECE1	0.150918	0.116211	0.733181	0.898331	0
ENSG00000227001	NA	NBPF2P	0.913842	3.11877	0.0773953	0.398268	0
ENSG00000187952	NA	HS6ST1P1	0.790223	1.47474	0.2246	0.654817	0
ENSG00000142794	84224	NBPF3	1.15927	6.40817	0.0113596	0.104197	0
ENSG00000162551	249	ALPL	0.640017	1.04669	0.306271	0.707418	0
ENSG00000090686	84196	USP48	0.361122	0.638122	0.424392	0.775983	0
ENSG00000187942	401944	LDLRAD2	0.166272	0.0981964	0.754005	0.906595	0
ENSG00000142798	3339	HSPG2	0.373777	0.722446	0.395343	0.763646	0
ENSG00000218510	29092	LINC00339	-0.415667	0.67544	0.411161	0.770308	0
ENSG00000070831	998	CDC42	0.537656	1.46276	0.226492	0.656765	0
ENSG00000162552	54361	WNT4	0.976255	2.39805	0.121486	0.50801	0
ENSG00000184677	9923	ZBTB40	0.134237	0.0845486	0.771225	0.912818	0
ENSG00000133216	2048	EPHB2	1.01499	3.63606	0.0565404	0.326809	0
ENSG00000004487	23028	KDM1A	0.320828	0.510852	0.47477	0.799222	0
ENSG00000169641	7798	LUZP1	0.874934	3.76739	0.0522612	0.310351	0
ENSG00000261326	NA	LINC01355	-0.776919	1.64487	0.199658	0.625661	0
ENSG00000125944	10236	HNRNPR	0.484597	1.18272	0.276803	0.689037	0
ENSG00000125945	80818	ZNF436	-0.380138	0.65324	0.418957	0.773632	0
ENSG00000249087	148898	ZNF436-AS1	-0.89682	2.36207	0.124317	0.514245	0
ENSG00000204219	6920	TCEA3	1.35646	7.02843	0.00802256	0.079124	0
ENSG00000088280	55616	ASAP3	-0.381551	0.66812	0.413708	0.771199	0
ENSG00000007968	1870	E2F2	1.04033	4.04007	0.0444319	0.280256	0
ENSG00000142676	6135	RPL11	0.365052	0.686434	0.40738	0.768794	0
ENSG00000236810	100506963	ELOA-AS1	-0.376283	0.464011	0.495756	0.808318	0
ENSG00000011007	6924	ELOA	0.909803	4.03364	0.0446015	0.280598	0
ENSG00000057757	57095	PITHD1	0.568114	1.53588	0.215232	0.644041	0
ENSG00000011009	11313	LYPLA2	0.394117	0.729762	0.39296	0.761663	0
ENSG00000117308	2582	GALE	0.660141	1.8465	0.174191	0.598297	0
ENSG00000117305	3155	HMGCL	-0.0652866	0.0191685	0.889885	0.961953	0
ENSG00000179163	2517	FUCA1	-1.37757	7.19842	0.00729679	0.0732519	0
ENSG00000189266	55629	PNRC2	0.721526	2.51476	0.112785	0.487558	0
ENSG00000188529	10772	SRSF10	0.563416	1.55444	0.212481	0.64045	0
ENSG00000001460	90529	STPG1	0.714457	2.12781	0.144647	0.551756	0
ENSG00000001461	57185	NIPAL3	0.935585	4.27398	0.0387002	0.256983	0
ENSG00000117602	11123	RCAN3	0.861874	3.41677	0.0645374	0.355445	0
ENSG00000133226	10250	SRRM1	0.269241	0.357851	0.549702	0.828798	0
ENSG00000169504	25932	CLIC4	0.74156	2.83597	0.092175	0.441402	0
ENSG00000117614	25949	SYF2	0.183664	0.163177	0.686248	0.879884	0
ENSG00000117616	57035	RSRP1	-0.325942	0.438995	0.507608	0.8138	0
ENSG00000183726	23585	TMEM50A	0.516078	1.32235	0.25017	0.674126	0
ENSG00000188672	6006	RHCE	0.259675	0.168389	0.681547	0.877787	0
ENSG00000204178	55219	MACO1	0.316934	0.477905	0.489373	0.805263	0
ENSG00000157978	26119	LDLRAP1	0.588625	1.64016	0.200304	0.626687	0
ENSG00000225643	NA		1.00344	2.22102	0.136143	0.536022	0
ENSG00000162430	57190	SELENON	-0.227872	0.262562	0.608366	0.850235	0
ENSG00000228172	NA		-0.859191	1.63414	0.201131	0.627652	0
ENSG00000117640	56181	MTFR1L	-0.0162634	0.0012763	0.971501	0.99117	0
ENSG00000127423	79000	AUNIP	1.47607	7.48305	0.00622824	0.0649232	0
ENSG00000182749	164091	PAQR7	0.387064	0.697057	0.403774	0.766264	0
ENSG00000117632	3925	STMN1	0.817443	3.31577	0.0686183	0.368971	0
ENSG00000158006	5051	PAFAH2	0.170006	0.118011	0.731202	0.897514	0
ENSG00000158008	2134	EXTL1	-0.903913	2.36698	0.123927	0.513187	0
ENSG00000175087	149420	PDIK1L	0.653153	1.68216	0.194638	0.62084	0
ENSG00000142684	51042	ZNF593	-0.125165	0.0641646	0.800031	0.924356	0
ENSG00000142675	10256	CNKSR1	1.06452	2.90699	0.0881964	0.429662	0
ENSG00000130695	64793	CEP85	0.532644	1.19292	0.274741	0.6889	0
ENSG00000142669	83442	SH3BGRL3	0.335759	0.574692	0.4484	0.78796	0
ENSG00000158062	91544	UBXN11	-0.0646432	0.016736	0.897067	0.964688	0
ENSG00000117682	79947	DHDDS	0.466875	1.02901	0.310392	0.711269	0
ENSG00000198830	3151	HMGN2	0.923735	4.24074	0.039465	0.259859	0
ENSG00000117676	6195	RPS6KA1	1.23703	5.85844	0.0155025	0.1319	0
ENSG00000260063	101928728	LOC101928728	0.982225	2.68501	0.101297	0.465925	0
ENSG00000117713	8289	ARID1A	0.409829	0.833115	0.361373	0.745301	0
ENSG00000060642	55650	PIGV	0.182313	0.143323	0.705	0.886639	0
ENSG00000204160	84243	ZDHHC18	0.0428808	0.00875152	0.925467	0.974801	0
ENSG00000142751	54707	GPN2	0.184661	0.160147	0.689021	0.880003	0
ENSG00000198746	63906	GPATCH3	0.0567936	0.013669	0.906928	0.96867	0
ENSG00000090273	10726	NUDC	0.423044	0.885353	0.34674	0.734795	0
ENSG00000253368	388610	TRNP1	-0.925799	4.1933	0.0405841	0.264798	0
ENSG00000158246	115572	TENT5B	0.827296	2.13743	0.143742	0.549541	0
ENSG00000090020	6548	SLC9A1	0.217296	0.233678	0.62881	0.855175	0
ENSG00000142784	23038	WDTC1	0.0793583	0.0311476	0.859912	0.948018	0
ENSG00000186501	84065	TMEM222	0.318303	0.48584	0.485789	0.804492	0
ENSG00000241547	NA	ACTG1P20	-0.342063	0.240192	0.624068	0.853225	0
ENSG00000142733	9064	MAP3K6	0.0873976	0.0352455	0.851082	0.945325	0
ENSG00000181773	2827	GPR3	0.602952	1.22139	0.269087	0.685859	0
ENSG00000158195	10163	WASF2	0.376672	0.717835	0.396855	0.76398	0
ENSG00000126705	27245	AHDC1	0.274849	0.374749	0.540427	0.826186	0
ENSG00000009780	199870	FAM76A	0.628553	1.66024	0.197571	0.62347	0
ENSG00000117758	23673	STX12	0.572423	1.61322	0.20404	0.630789	0
ENSG00000117751	5511	PPP1R8	0.284999	0.393743	0.530338	0.822313	0
ENSG00000130775	9473	THEMIS2	0.761669	2.20644	0.137436	0.537203	0
ENSG00000117748	6118	RPA2	0.170552	0.138405	0.709872	0.888538	0
ENSG00000158156	55113	XKR8	0.12522	0.0629163	0.801945	0.925085	0
ENSG00000158161	2140	EYA3	0.291105	0.395984	0.529171	0.822019	0
ENSG00000228589	NA	SPCS2P4	0.410292	0.455017	0.499962	0.810063	0
ENSG00000169403	5724	PTAFR	0.483209	0.531233	0.466089	0.795518	0
ENSG00000126698	22826	DNAJC8	0.528893	1.38155	0.239838	0.667329	0
ENSG00000130770	93974	ATP5IF1	0.625473	1.87987	0.170349	0.592604	0
ENSG00000130766	83667	SESN2	0.301166	0.412053	0.520929	0.819895	0
ENSG00000130772	54797	MED18	-0.225266	0.21576	0.64229	0.861883	0
ENSG00000204138	65979	PHACTR4	0.46568	1.03709	0.308499	0.70961	0
ENSG00000180198	1104	RCC1	0.533466	1.36303	0.243012	0.670243	0
ENSG00000242125	8420	SNHG3	-0.285383	0.361829	0.547492	0.828374	0
ENSG00000200087	26768	SNORA73B	-0.653199	1.37785	0.240467	0.667641	0
ENSG00000279443	NA		1.07327	3.12565	0.077069	0.397369	0
ENSG00000180098	54952	TRNAU1AP	0.0873004	0.032582	0.856756	0.947173	0
ENSG00000197989	85028	SNHG12	0.495651	0.952878	0.328988	0.723941	0
ENSG00000120656	6883	TAF12	0.228651	0.2364	0.626818	0.854681	0
ENSG00000188060	115273	RAB42	-0.0468025	0.00793442	0.929022	0.976135	0
ENSG00000162419	10691	GMEB1	0.151563	0.104497	0.746499	0.904086	0
ENSG00000198492	51441	YTHDF2	0.428321	0.906556	0.34103	0.731298	0
ENSG00000159023	2035	EPB41	-0.53958	1.30248	0.253761	0.675976	0
ENSG00000253304	399474	TMEM200B	0.420398	0.837861	0.360009	0.744171	0
ENSG00000116350	6429	SRSF4	0.30921	0.472469	0.491854	0.806977	0
ENSG00000116353	51102	MECR	-0.0383597	0.00642529	0.936112	0.978281	0
ENSG00000060656	10076	PTPRU	-1.2706	7.22036	0.00720811	0.0725469	0
ENSG00000186056	100129196	MATN1-AS1	-1.31168	5.119	0.0236652	0.182043	0
ENSG00000223382	105378622	LINC01778	-0.271348	0.169931	0.680173	0.876996	0
ENSG00000162512	9672	SDC3	-0.0872469	0.0384095	0.844623	0.94302	0
ENSG00000134644	9698	PUM1	0.379173	0.713114	0.398412	0.764234	0
ENSG00000060688	9410	SNRNP40	0.282019	0.376358	0.539559	0.825421	0
ENSG00000121766	51538	ZCCHC17	0.217719	0.219785	0.639204	0.860458	0
ENSG00000142910	64129	TINAGL1	0.12743	0.0264885	0.870713	0.952516	0
ENSG00000162517	553115	PEF1	0.53437	1.38447	0.239342	0.66681	0
ENSG00000084636	1307	COL16A1	-1.02049	5.22478	0.0222672	0.173667	0
ENSG00000121753	576	ADGRB2	-0.613135	1.80177	0.179499	0.604777	0
ENSG00000134668	90853	SPOCD1	-0.262237	0.330605	0.565303	0.834476	0
ENSG00000184007	8073	PTP4A2	0.282743	0.407572	0.523204	0.820458	0
ENSG00000121774	10657	KHDRBS1	0.373595	0.702745	0.401863	0.765715	0
ENSG00000121775	55116	TMEM39B	0.0594207	0.0159449	0.899516	0.965692	0
ENSG00000025800	23633	KPNA6	0.368717	0.672295	0.412253	0.770762	0
ENSG00000084652	200081	TXLNA	0.402122	0.800889	0.370828	0.750859	0
ENSG00000160050	79140	CCDC28B	-0.608782	1.40273	0.236266	0.665351	0
ENSG00000160051	55721	IQCC	0.188576	0.134247	0.714069	0.890021	0
ENSG00000160055	56063	TMEM234	-0.618981	1.47115	0.225164	0.655196	0
ENSG00000084623	8668	EIF3I	0.39781	0.791588	0.37362	0.751855	0
ENSG00000220785	339483	MTMR9LP	-0.874759	2.85764	0.090941	0.437838	0
ENSG00000183615	84734	FAM167B	-0.739249	1.60991	0.204504	0.631026	0
ENSG00000116478	3065	HDAC1	0.323719	0.518565	0.471455	0.797376	0
ENSG00000175130	65108	MARCKSL1	0.37863	0.698698	0.403222	0.766155	0
ENSG00000225828	100128071	FAM229A	-0.141286	0.0706403	0.790407	0.920516	0
ENSG00000160058	55108	BSDC1	0.293646	0.422038	0.515922	0.81767	0
ENSG00000160062	653121	ZBTB8A	0.0964388	0.0402348	0.841022	0.941512	0
ENSG00000176261	339487	ZBTB8OS	0.653372	1.84555	0.174302	0.598415	0
ENSG00000162521	5928	RBBP4	0.350058	0.609171	0.4351	0.781361	0
ENSG00000162520	81493	SYNC	0.280294	0.39018	0.532205	0.823054	0
ENSG00000162522	57648	KIAA1522	-0.0766439	0.0288976	0.865016	0.950448	0
ENSG00000134684	8565	YARS1	0.489619	1.19596	0.27413	0.68843	0
ENSG00000116497	64766	S100PBP	0.084478	0.0335816	0.8546	0.946127	0
ENSG00000116514	127544	RNF19B	0.793285	2.64361	0.103967	0.469856	0
ENSG00000004455	204	AK2	0.520696	1.33762	0.247455	0.672989	0
ENSG00000142920	113451	AZIN2	-0.241329	0.224666	0.635507	0.858126	0
ENSG00000278997	NA		0.253886	0.236619	0.626658	0.854681	0
ENSG00000116525	55223	TRIM62	0.577948	1.5818	0.208502	0.635154	0
ENSG00000160094	149076	ZNF362	-0.105676	0.0542814	0.815774	0.931138	0
ENSG00000134686	1912	PHC2	0.0645215	0.0207141	0.885561	0.960157	0
ENSG00000121903	7579	ZSCAN20	0.434834	0.742816	0.38876	0.758726	0
ENSG00000163866	113444	SMIM12	0.643045	1.90115	0.167949	0.589252	0
ENSG00000284773	NA		-0.0800687	0.0216297	0.883076	0.959366	0
ENSG00000241014	653160	GPR199P	-0.571032	0.834193	0.361063	0.745	0
ENSG00000243749	100506144	TMEM35B	-0.321665	0.35158	0.55322	0.830031	0
ENSG00000163867	9204	ZMYM6	0.413247	0.699957	0.402798	0.765915	0
ENSG00000197056	79830	ZMYM1	0.264825	0.301481	0.582956	0.840651	0
ENSG00000116560	6421	SFPQ	0.220759	0.246698	0.61941	0.851754	0
ENSG00000146463	9202	ZMYM4	0.174155	0.150257	0.69829	0.884587	0
ENSG00000142687	79932	KIAA0319L	0.104745	0.052236	0.819217	0.932294	0
ENSG00000020129	23154	NCDN	0.374209	0.673805	0.411728	0.770308	0
ENSG00000116819	339488	TFAP2E	0.0090367	0.000233022	0.987821	0.996505	0
ENSG00000126067	5690	PSMB2	0.409298	0.828388	0.362739	0.745647	0
ENSG00000142686	127703	C1orf216	0.655538	2.01381	0.155873	0.569315	0
ENSG00000092853	63967	CLSPN	1.01757	4.432	0.0352711	0.240403	0
ENSG00000134698	192670	AGO4	0.0243456	0.00264608	0.958975	0.987358	0
ENSG00000092847	26523	AGO1	0.243114	0.285986	0.592804	0.845152	0
ENSG00000126070	192669	AGO3	0.0464798	0.0101766	0.919646	0.973295	0
ENSG00000116863	54936	ADPRS	0.296029	0.407603	0.523189	0.820458	0
ENSG00000054116	27095	TRAPPC3	0.281277	0.381476	0.536815	0.824703	0
ENSG00000116871	55700	MAP7D1	0.694954	2.44171	0.118147	0.50003	0
ENSG00000054118	9967	THRAP3	0.43764	0.959132	0.327406	0.722258	0
ENSG00000214193	79729	SH3D21	-0.3544	0.535072	0.464482	0.794905	0
ENSG00000142694	55194	EVA1B	-0.0811942	0.0325631	0.856797	0.947173	0
ENSG00000286379	NA		0.189202	0.0916981	0.762029	0.910142	0
ENSG00000196182	83931	STK40	0.664379	2.11634	0.145734	0.553548	0
ENSG00000181817	84967	LSM10	0.11645	0.0608207	0.805204	0.926329	0
ENSG00000116885	127700	OSCP1	-0.699148	1.80462	0.179155	0.604293	0
ENSG00000116898	64960	MRPS15	0.542944	1.40352	0.236134	0.665351	0
ENSG00000233621	728431	ZC3H12A-DT	0.809562	2.44323	0.118033	0.49994	0
ENSG00000163874	80149	ZC3H12A	0.728771	2.28225	0.130862	0.526741	0
ENSG00000163875	64769	MEAF6	0.436379	0.9215	0.337082	0.729463	0
ENSG00000163877	79753	SNIP1	0.3974	0.72981	0.392945	0.761663	0
ENSG00000134697	29889	GNL2	0.308491	0.468068	0.493877	0.807729	0
ENSG00000116922	54955	C1orf109	0.0630302	0.0175817	0.894513	0.963813	0
ENSG00000134690	55143	CDCA8	0.972017	4.2451	0.0393638	0.259419	0
ENSG00000185090	149175	MANEAL	0.469092	1.03084	0.309962	0.711022	0
ENSG00000196449	79693	YRDC	0.408057	0.70148	0.402287	0.765771	0
ENSG00000197982	127687	C1orf122	0.200338	0.187599	0.664923	0.870049	0
ENSG00000188786	4520	MTF1	0.346107	0.562186	0.453381	0.79079	0
ENSG00000204084	3633	INPP5B	0.127025	0.0735961	0.786171	0.91902	0
ENSG00000183431	10946	SF3A3	0.515932	1.31171	0.252085	0.674414	0
ENSG00000183386	2275	FHL3	0.982225	4.59271	0.0321081	0.223988	0
ENSG00000183520	51118	UTP11	0.546095	1.41613	0.234041	0.664029	0
ENSG00000116954	64121	RRAGC	0.934	3.91537	0.0478464	0.294012	0
ENSG00000228436	105378663	LOC105378663	-0.0639219	0.0112121	0.915672	0.971697	0
ENSG00000214114	26292	MYCBP	0.074163	0.0232225	0.87888	0.957439	0
ENSG00000174574	79647	AKIRIN1	0.653758	2.08653	0.148604	0.556592	0
ENSG00000168653	4725	NDUFS5	0.222829	0.242653	0.622296	0.852788	0
ENSG00000127603	23499	MACF1	0.360461	0.664869	0.414846	0.77221	0
ENSG00000243970	728448	PPIEL	-1.5672	7.05404	0.00790867	0.0782461	0
ENSG00000090621	8761	PABPC4	0.28821	0.41988	0.516997	0.81795	0
ENSG00000084072	10450	PPIE	0.173081	0.142145	0.706157	0.886639	0
ENSG00000043514	54802	TRIT1	0.438491	0.87066	0.350773	0.737231	0
ENSG00000168389	84879	MFSD2A	0.37129	0.420615	0.51663	0.817671	0
ENSG00000131236	10487	CAP1	0.952983	4.60601	0.0318602	0.222752	0
ENSG00000131238	5538	PPT1	0.647043	2.06313	0.1509	0.561409	0
ENSG00000117000	6018	RLF	0.48188	1.11271	0.291494	0.698051	0
ENSG00000259943	NA	ZMPSTE24-DT	1.04053	3.80265	0.0511716	0.30632	0
ENSG00000084073	10269	ZMPSTE24	0.607839	1.8092	0.178605	0.603984	0
ENSG00000084070	64744	SMAP2	0.486576	1.11619	0.29074	0.697657	0
ENSG00000187801	65243	ZFP69B	0.441354	0.76304	0.382379	0.754744	0
ENSG00000260920	NA		0.0234552	0.00215074	0.96301	0.989007	0
ENSG00000187815	339559	ZFP69	-0.18107	0.126338	0.72226	0.893882	0
ENSG00000238287	NA	EXO5-DT	0.558491	0.761874	0.382743	0.754744	0
ENSG00000164002	64789	EXO5	1.02166	4.07955	0.0434052	0.276202	0
ENSG00000117010	127396	ZNF684	0.426113	0.675378	0.411183	0.770308	0
ENSG00000117016	9783	RIMS3	-0.408069	0.479588	0.488609	0.805263	0
ENSG00000066136	4802	NFYC	0.0320938	0.00473707	0.945128	0.981963	0
ENSG00000179862	163732	CITED4	-0.741827	2.01121	0.156141	0.569632	0
ENSG00000171793	1503	CTPS1	0.569513	1.57839	0.208992	0.636157	0
ENSG00000281207	100507178	SLFNL1-AS1	1.2795	3.61031	0.0574225	0.329436	0
ENSG00000010803	22955	SCMH1	-0.557725	1.46061	0.226833	0.657498	0
ENSG00000127124	59269	HIVEP3	0.580316	1.38615	0.239057	0.666537	0
ENSG00000198815	22887	FOXJ3	0.212319	0.221095	0.638207	0.859558	0
ENSG00000127125	79717	PPCS	0.419418	0.758038	0.383943	0.75504	0
ENSG00000186409	728621	CCDC30	-0.0875836	0.0215727	0.88323	0.959366	0
ENSG00000236876	NA	TMSB4XP1	-0.131564	0.0336742	0.854402	0.946121	0
ENSG00000171960	10465	PPIH	0.339625	0.495701	0.481395	0.801507	0
ENSG00000065978	4904	YBX1	0.897597	4.10393	0.0427836	0.274743	0
ENSG00000117385	64175	P3H1	-0.0920884	0.0425702	0.836537	0.93903	0
ENSG00000164008	79078	C1orf50	-0.316052	0.377498	0.538945	0.825343	0
ENSG00000177868	374969	SVBP	0.0629352	0.0167188	0.897119	0.964688	0
ENSG00000164010	114625	ERMAP	-0.724266	2.37183	0.123542	0.512625	0
ENSG00000228192	NA	ZNF691-DT	-1.17307	3.21556	0.0729412	0.384659	0
ENSG00000164011	51058	ZNF691	-0.130237	0.0652642	0.798361	0.923978	0
ENSG00000117394	6513	SLC2A1	0.407586	0.83868	0.359775	0.744028	0
ENSG00000227533	440584	SLC2A1-DT	-0.143654	0.0722326	0.788113	0.919855	0
ENSG00000117395	10969	EBNA1BP2	0.639179	1.98251	0.159126	0.574021	0
ENSG00000243710	149465	CFAP57	1.16603	3.84577	0.0498718	0.301976	0
ENSG00000117399	991	CDC20	0.819054	3.19209	0.0739952	0.387926	0
ENSG00000066322	64834	ELOVL1	0.534874	1.39642	0.237324	0.665351	0
ENSG00000159479	112950	MED8	0.419351	0.840869	0.359148	0.743558	0
ENSG00000198198	23334	SZT2	0.486872	1.14587	0.284415	0.692114	0
ENSG00000178922	81888	HYI	-0.625302	1.61425	0.203896	0.630789	0
ENSG00000142949	5792	PTPRF	-0.521705	1.34166	0.246742	0.672355	0
ENSG00000066135	9682	KDM4A	0.407255	0.780202	0.377079	0.752908	0
ENSG00000126091	6487	ST3GAL3	-0.00943193	0.000328499	0.98554	0.995994	0
ENSG00000117407	9048	ARTN	0.995588	2.32079	0.127655	0.521712	0
ENSG00000117408	9670	IPO13	-0.233261	0.245246	0.620443	0.852438	0
ENSG00000132768	1802	DPH2	-0.253669	0.27727	0.598496	0.847402	0
ENSG00000117410	533	ATP6V0B	0.351915	0.593908	0.440912	0.784183	0
ENSG00000117411	8704	B4GALT2	-0.241275	0.288707	0.59105	0.844979	0
ENSG00000159214	149473	CCDC24	-0.0748047	0.0202247	0.886911	0.96088	0
ENSG00000196517	6536	SLC6A9	1.16619	6.35856	0.0116816	0.106345	0
ENSG00000230615	107984948	LOC107984948	-0.448914	0.705643	0.400894	0.765255	0
ENSG00000171872	128209	KLF17	0.412646	0.437963	0.508107	0.813939	0
ENSG00000178028	55929	DMAP1	0.0439072	0.00869118	0.925724	0.974801	0
ENSG00000117419	79033	ERI3	0.106249	0.0545564	0.815316	0.931074	0
ENSG00000187147	55182	RNF220	0.113636	0.0633075	0.801343	0.924798	0
ENSG00000126106	79639	TMEM53	0.69989	1.87482	0.170924	0.593453	0
ENSG00000198520	339541	ARMH1	0.155679	0.0567862	0.81165	0.929202	0
ENSG00000142945	11004	KIF2C	1.03714	5.01148	0.0251797	0.189522	0
ENSG00000225721	NA		-0.0721974	0.0204043	0.886414	0.960673	0
ENSG00000142937	6202	RPS8	0.252828	0.332095	0.564428	0.834201	0
ENSG00000142959	266675	BEST4	-2.00128	4.39968	0.0359456	0.243418	0
ENSG00000173846	1263	PLK3	0.78465	2.7703	0.0960283	0.452133	0
ENSG00000222009	149478	BTBD19	-0.79954	2.53879	0.11108	0.484008	0
ENSG00000117425	8643	PTCH2	-0.170419	0.105072	0.745826	0.903845	0
ENSG00000226499	NA		0.288831	0.204784	0.650887	0.865216	0
ENSG00000070785	8891	EIF2B3	0.418558	0.807288	0.368923	0.749679	0
ENSG00000126107	79654	HECTD3	0.451719	0.982578	0.321563	0.719537	0
ENSG00000126088	7389	UROD	0.398698	0.777693	0.377848	0.753346	0
ENSG00000281912	400752	LINC01144	1.1845	2.86929	0.0902846	0.435938	0
ENSG00000132781	4595	MUTYH	-0.16389	0.0751003	0.784051	0.917786	0
ENSG00000132773	114034	TOE1	-0.0112873	0.000537288	0.981507	0.995145	0
ENSG00000070759	10420	TESK2	-0.307404	0.327162	0.567335	0.834713	0
ENSG00000280670	126661	CCDC163	0.53642	0.943366	0.331414	0.725584	0
ENSG00000132763	25974	MMACHC	0.0351807	0.00497454	0.943772	0.98126	0
ENSG00000117450	5052	PRDX1	0.7276	2.67617	0.101861	0.467299	0
ENSG00000117448	10327	AKR1A1	0.59933	1.73727	0.187485	0.615289	0
ENSG00000132780	4678	NASP	0.587173	1.68088	0.194808	0.62084	0
ENSG00000159592	60313	GPBP1L1	0.469935	1.0867	0.297203	0.701998	0
ENSG00000234329	100270896	RPL7AP16	1.25297	3.46819	0.0625596	0.348981	0
ENSG00000159596	51249	TMEM69	0.368906	0.612622	0.433802	0.781261	0
ENSG00000197429	3652	IPP	0.210724	0.193818	0.659758	0.868173	0
ENSG00000230896	NA		0.124116	0.053001	0.817921	0.931548	0
ENSG00000086015	23139	MAST2	0.241937	0.286316	0.592591	0.845133	0
ENSG00000117461	8503	PIK3R3	0.336352	0.449678	0.502488	0.811187	0
ENSG00000085998	55624	POMGNT1	0.121279	0.0718336	0.788686	0.919934	0
ENSG00000085999	8438	RAD54L	0.28152	0.301517	0.582933	0.840651	0
ENSG00000132128	10489	LRRC41	0.176558	0.155212	0.693604	0.882631	0
ENSG00000173660	7388	UQCRH	0.358553	0.6272	0.428384	0.778494	0
ENSG00000117481	387338	NSUN4	0.378576	0.644497	0.422087	0.775321	0
ENSG00000117480	2166	FAAH	0.706199	1.51735	0.21802	0.646092	0
ENSG00000079277	8569	MKNK1	0.386286	0.685525	0.407691	0.768794	0
ENSG00000142961	148932	MOB3C	-0.00799706	0.000287126	0.986481	0.996087	0
ENSG00000123472	64756	ATPAF1	0.239772	0.275617	0.599589	0.848046	0
ENSG00000159658	9813	EFCAB14	0.374384	0.698656	0.403236	0.766155	0
ENSG00000123473	6491	STIL	1.06997	4.948	0.0261208	0.194743	0
ENSG00000162368	51727	CMPK1	0.640613	2.04485	0.152722	0.564365	0
ENSG00000225762	NA	LINC01389	-0.204715	0.103579	0.747576	0.904558	0
ENSG00000237424	84793	FOXD2-AS1	1.11637	4.52402	0.0334222	0.2307	0
ENSG00000186564	2306	FOXD2	0.495172	0.792577	0.373322	0.751855	0
ENSG00000185104	11124	FAF1	0.492875	1.17445	0.278488	0.689037	0
ENSG00000123080	1031	CDKN2C	-0.305203	0.449036	0.502793	0.811187	0
ENSG00000123091	26994	RNF11	0.222953	0.248004	0.618484	0.851754	0
ENSG00000085831	22996	TTC39A	-1.3554	1.57366	0.209676	0.637251	0
ENSG00000085832	2060	EPS15	0.341119	0.573193	0.448993	0.788734	0
ENSG00000117859	114883	OSBPL9	0.0552396	0.0150945	0.902218	0.967192	0
ENSG00000078618	4898	NRDC	0.478867	1.14472	0.284657	0.692114	0
ENSG00000266993	NA		0.736471	1.61449	0.203862	0.630789	0
ENSG00000169213	5865	RAB3B	0.0931637	0.0443026	0.833292	0.937916	0
ENSG00000117862	51060	TXNDC12	0.214672	0.195617	0.658283	0.867913	0
ENSG00000198841	112970	KTI12	0.115829	0.0535257	0.817038	0.931548	0
ENSG00000134717	91408	BTF3L4	0.604385	1.7717	0.183171	0.610285	0
ENSG00000157077	9372	ZFYVE9	0.0372374	0.00662781	0.935115	0.978236	0
ENSG00000154222	200014	CC2D1B	0.268136	0.331908	0.564538	0.834201	0
ENSG00000085840	4998	ORC1	1.09924	4.661	0.0308552	0.218346	0
ENSG00000134748	84950	PRPF38A	-0.200381	0.188221	0.664402	0.870047	0
ENSG00000134744	23318	TUT4	0.237538	0.270225	0.603181	0.849176	0
ENSG00000116157	2882	GPX7	-0.814047	2.50502	0.113484	0.489368	0
ENSG00000162377	65260	COA7	0.678258	2.14816	0.142741	0.547166	0
ENSG00000162378	79699	ZYG11B	0.279277	0.383726	0.535616	0.824564	0
ENSG00000228929	729236	RPS13P2	0.478319	0.78502	0.37561	0.751855	0
ENSG00000121310	55268	ECHDC2	-0.506848	1.08432	0.297734	0.702829	0
ENSG00000116171	6342	SCP2	0.818469	3.30651	0.0690059	0.370378	0
ENSG00000236360	NA	RRAS2P1	-0.231495	0.14254	0.705769	0.886639	0
ENSG00000174348	127435	PODN	-0.287116	0.408578	0.522692	0.820458	0
ENSG00000157184	1376	CPT2	0.265083	0.301462	0.582967	0.840651	0
ENSG00000236723	NA		0.210933	0.0996383	0.752264	0.906416	0
ENSG00000162384	54987	CZIB	0.27438	0.359541	0.548762	0.828616	0
ENSG00000162385	4116	MAGOH	0.253767	0.294861	0.587122	0.843239	0
ENSG00000226754	100507564	MAGOH-DT	0.982199	2.767	0.0962264	0.452538	0
ENSG00000157193	7804	LRP8	1.30812	6.79078	0.00916296	0.0883152	0
ENSG00000174332	148979	GLIS1	-0.7099	2.31814	0.127873	0.521721	0
ENSG00000058804	55706	NDC1	0.78054	2.85734	0.0909577	0.437838	0
ENSG00000058799	54432	YIPF1	0.593049	1.55452	0.21247	0.64045	0
ENSG00000081870	51668	HSPB11	0.512515	1.16552	0.280324	0.690613	0
ENSG00000116212	115353	LRRC42	0.247048	0.292034	0.58892	0.843865	0
ENSG00000116209	9528	TMEM59	0.108744	0.0601009	0.806336	0.926483	0
ENSG00000116205	127428	TCEANC2	0.178538	0.132594	0.715758	0.890579	0
ENSG00000215883	606495	CYB5RL	0.679405	1.8904	0.169157	0.590809	0
ENSG00000116221	51253	MRPL37	0.525419	1.34382	0.246361	0.671781	0
ENSG00000157216	23648	SSBP3	0.0557496	0.0154012	0.901235	0.966685	0
ENSG00000162390	26027	ACOT11	0.406555	0.538081	0.463229	0.794396	0
ENSG00000243725	7268	TTC4	0.237211	0.202625	0.65261	0.865982	0
ENSG00000162396	25973	PARS2	0.37432	0.547293	0.459426	0.793089	0
ENSG00000162402	23358	USP24	0.284565	0.39928	0.527461	0.82151	0
ENSG00000162409	5563	PRKAA2	-0.778177	2.31336	0.128266	0.522735	0
ENSG00000162600	115209	OMA1	-0.834272	2.66773	0.102402	0.468144	0
ENSG00000162601	114803	MYSM1	0.442139	0.905167	0.3414	0.731674	0
ENSG00000177606	3725	JUN	-0.324416	0.539755	0.462534	0.794396	0
ENSG00000234807	101926907	LOC101926907	0.388373	0.406606	0.523697	0.820528	0
ENSG00000232453	105378753	LINC02777	1.54342	7.32875	0.00678603	0.0691965	0
ENSG00000224609	729467	HSD52	0.764547	1.70149	0.192094	0.619602	0
ENSG00000172456	55277	FGGY	0.54413	1.14453	0.284698	0.692114	0
ENSG00000162599	4774	NFIA	-0.157628	0.11824	0.730951	0.897497	0
ENSG00000162604	83941	TM2D1	0.145781	0.098945	0.753099	0.906416	0
ENSG00000132849	10207	PATJ	0.192184	0.163726	0.685749	0.879884	0
ENSG00000162607	7398	USP1	0.361202	0.637484	0.424623	0.776084	0
ENSG00000116641	85440	DOCK7	0.792905	3.10799	0.0779091	0.39952	0
ENSG00000125703	84938	ATG4C	0.698847	2.04064	0.153145	0.564647	0
ENSG00000088035	29929	ALG6	0.969863	3.69763	0.0544899	0.319303	0
ENSG00000142856	23421	ITGB3BP	0.25952	0.277552	0.59831	0.847402	0
ENSG00000203965	84455	EFCAB7	0.448795	0.794205	0.372832	0.751855	0
ENSG00000079739	5236	PGM1	-0.159122	0.12318	0.725611	0.895318	0
ENSG00000162437	55225	RAVER2	-0.386173	0.601041	0.438181	0.783242	0
ENSG00000162434	3716	JAK1	0.149337	0.113516	0.736177	0.899433	0
ENSG00000213625	54741	LEPROT	0.0374562	0.00705549	0.933059	0.977588	0
ENSG00000116678	3953	LEPR	0.093411	0.0388019	0.843842	0.942518	0
ENSG00000184588	5142	PDE4B	-0.22785	0.255154	0.613469	0.851459	0
ENSG00000118473	84251	SGIP1	0.510403	1.25669	0.262279	0.682081	0
ENSG00000152763	79819	DNAI4	-0.874642	2.67429	0.101981	0.467577	0
ENSG00000198160	57708	MIER1	0.444809	0.959664	0.327272	0.722258	0
ENSG00000116704	23169	SLC35D1	0.184382	0.162026	0.687298	0.879884	0
ENSG00000142864	26135	SERBP1	0.465022	1.10029	0.294203	0.700274	0
ENSG00000116717	1647	GADD45A	0.594827	1.70349	0.191832	0.619602	0
ENSG00000172380	55970	GNG12	0.472966	1.14637	0.28431	0.692114	0
ENSG00000232284	100289178	GNG12-AS1	-0.88581	1.66698	0.196663	0.622894	0
ENSG00000162595	9077	DIRAS3	-0.102262	0.0312128	0.859766	0.948018	0
ENSG00000116729	79971	WLS	0.766702	2.95016	0.0858689	0.423274	0
ENSG00000024526	55635	DEPDC1	0.823569	3.08229	0.0791491	0.403335	0
ENSG00000066557	55631	LRRC40	0.8572	3.34263	0.0675067	0.365056	0
ENSG00000116754	9295	SRSF11	0.314796	0.490184	0.483845	0.803056	0
ENSG00000118454	81573	ANKRD13C	0.030296	0.00437309	0.947275	0.982892	0
ENSG00000197568	11147	HHLA3	-1.04285	4.12309	0.0423019	0.272949	0
ENSG00000116761	1491	CTH	0.18663	0.120757	0.728215	0.896645	0
ENSG00000132485	9406	ZRANB2	0.388712	0.736007	0.390943	0.760147	0
ENSG00000229956	NA	ZRANB2-DT	0.494151	0.684602	0.408007	0.768849	0
ENSG00000172260	257194	NEGR1	-0.209087	0.195579	0.658313	0.867913	0
ENSG00000162620	127255	LRRIQ3	0.669763	1.16439	0.280557	0.690749	0
ENSG00000254685	8790	FPGT	0.561036	1.31713	0.251107	0.674255	0
ENSG00000116791	1429	CRYZ	0.529694	1.3005	0.254121	0.675976	0
ENSG00000162623	127253	TYW3	0.302816	0.429543	0.512213	0.816021	0
ENSG00000117054	34	ACADM	0.972037	4.41641	0.0355949	0.241667	0
ENSG00000137955	5876	RABGGTB	0.408183	0.788151	0.37466	0.751855	0
ENSG00000184005	256435	ST6GALNAC3	0.300385	0.222817	0.636902	0.859272	0
ENSG00000226415	NA	TPI1P1	0.018986	0.00117184	0.972692	0.991471	0
ENSG00000142892	10026	PIGK	0.382557	0.709124	0.399735	0.764781	0
ENSG00000226084	645441	RPL17P6	0.158028	0.0808234	0.776185	0.914421	0
ENSG00000036549	26009	ZZZ3	0.180707	0.158682	0.690373	0.880799	0
ENSG00000077254	23032	USP33	0.353538	0.611942	0.434058	0.781301	0
ENSG00000180488	374986	MIGA1	0.670275	2.05377	0.151829	0.563442	0
ENSG00000219201	NA		0.0753916	0.0162924	0.898433	0.965081	0
ENSG00000235927	374987	NEXN-AS1	-0.26091	0.18747	0.665031	0.870049	0
ENSG00000162614	91624	NEXN	0.856159	3.58211	0.0584049	0.33434	0
ENSG00000162613	8880	FUBP1	0.0450577	0.0100339	0.92021	0.973557	0
ENSG00000162616	11080	DNAJB4	0.742605	2.64935	0.103592	0.469767	0
ENSG00000137965	10561	IFI44	0.949728	4.09487	0.0430134	0.275183	0
ENSG00000162618	64123	ADGRL4	0.375337	0.568731	0.450763	0.789664	0
ENSG00000117114	23266	ADGRL2	-0.119891	0.0719828	0.788471	0.919934	0
ENSG00000137941	79739	TTLL7	0.503561	1.12543	0.288752	0.695313	0
ENSG00000271576	NA	PRKACB-DT	-1.09214	2.43723	0.118485	0.50091	0
ENSG00000142875	5567	PRKACB	0.180306	0.160437	0.688754	0.879926	0
ENSG00000203943	148418	SAMD13	-1.48945	4.58185	0.0323123	0.225113	0
ENSG00000117133	80135	RPF1	0.553648	1.43768	0.230515	0.660998	0
ENSG00000174021	2787	GNG5	0.319441	0.473737	0.491273	0.806683	0
ENSG00000117151	1486	CTBS	-0.0781668	0.0283444	0.866302	0.950876	0
ENSG00000117155	117178	SSX2IP	0.939875	4.11441	0.0425194	0.273699	0
ENSG00000153898	255231	MCOLN2	0.877838	2.84406	0.0917121	0.440257	0
ENSG00000162643	126820	DNAI3	-1.55469	7.54412	0.00602061	0.0633513	0
ENSG00000280099	NA		1.22699	5.56432	0.0183301	0.149019	0
ENSG00000162642	148423	C1orf52	0.562428	1.45253	0.228122	0.6586	0
ENSG00000142867	8915	BCL10	0.467369	1.036	0.308754	0.709924	0
ENSG00000223653	NA	BCL10-AS1	0.739377	1.28492	0.256986	0.67823	0
ENSG00000153904	23576	DDAH1	0.341217	0.585282	0.444249	0.784923	0
ENSG00000273264	NA		1.87115	6.4595	0.0110361	0.101764	0
ENSG00000142871	3491	CCN1	-0.292063	0.443508	0.505434	0.812888	0
ENSG00000117174	54680	ZNHIT6	0.319275	0.491297	0.48335	0.802488	0
ENSG00000122417	57489	ODF2L	0.12928	0.0723359	0.787966	0.919751	0
ENSG00000137975	9635	CLCA2	0.113368	0.0253631	0.873466	0.953838	0
ENSG00000261737			-0.553182	0.707941	0.400128	0.764907	0
ENSG00000097033	51100	SH3GLB1	0.344333	0.595447	0.440321	0.784183	0
ENSG00000183291	9403	SELENOF	0.18869	0.177946	0.673145	0.873988	0
ENSG00000153936	9653	HS2ST1	0.410304	0.816042	0.36634	0.748233	0
ENSG00000143013	8543	LMO4	0.129161	0.0781658	0.779799	0.91576	0
ENSG00000065243	5586	PKN2	0.378959	0.700361	0.402662	0.765896	0
ENSG00000137947	2959	GTF2B	0.62822	1.8322	0.175868	0.600124	0
ENSG00000137944	56267	KYAT3	-0.0626633	0.018442	0.891978	0.962527	0
ENSG00000213516	494115	RBMXL1	0.948317	4.04627	0.0442689	0.279564	0
ENSG00000117226	2635	GBP3	0.392937	0.759675	0.38343	0.754744	0
ENSG00000162654	115361	GBP4	0.294422	0.395465	0.52944	0.822175	0
ENSG00000154451	115362	GBP5	0.0471002	0.00109522	0.9736	0.991756	0
ENSG00000225492	400759	GBP1P1	-0.903697	2.52077	0.112356	0.486503	0
ENSG00000197147	23507	LRRC8B	1.32736	7.17259	0.00740259	0.0740306	0
ENSG00000231999	400761	LRRC8C-DT	0.312483	0.320459	0.571332	0.836138	0
ENSG00000171488	84230	LRRC8C	0.435543	0.911824	0.339631	0.730765	0
ENSG00000171492	55144	LRRC8D	0.954053	4.40074	0.0359234	0.243373	0
ENSG00000228175	NA	GEMIN8P4	1.48018	4.86442	0.0274159	0.20191	0
ENSG00000162664	284695	ZNF326	0.487498	1.10566	0.293028	0.699382	0
ENSG00000122482	84146	ZNF644	0.475029	1.08499	0.297584	0.70258	0
ENSG00000097046	8317	CDC7	1.16673	5.18358	0.0228013	0.177129	0
ENSG00000069702	7049	TGFBR3	-0.63629	1.91578	0.166322	0.587035	0
ENSG00000189195	284697	BTBD8	-0.504397	0.949827	0.329763	0.72437	0
ENSG00000174842	11146	GLMN	0.751189	2.28721	0.130444	0.526493	0
ENSG00000122484	79871	RPAP2	0.497899	1.14667	0.284246	0.692114	0
ENSG00000067208	7813	EVI5	0.446155	0.960703	0.32701	0.722258	0
ENSG00000122406	6125	RPL5	0.280615	0.407315	0.523336	0.82047	0
ENSG00000154511	388650	DIPK1A	0.182826	0.162203	0.687137	0.879884	0
ENSG00000143033	22823	MTF2	0.0630214	0.0171547	0.895794	0.964395	0
ENSG00000117500	50999	TMED5	0.124256	0.0754204	0.783602	0.917733	0
ENSG00000122483	343099	CCDC18	0.202382	0.16037	0.688816	0.879926	0
ENSG00000223745	NA	CCDC18-AS1	-0.569537	1.178	0.277764	0.689037	0
ENSG00000117505	1810	DR1	0.25589	0.323426	0.569556	0.83557	0
ENSG00000137936	8412	BCAR3	0.444018	0.9484	0.330127	0.724805	0
ENSG00000260464	NA		1.03963	2.72176	0.0989886	0.458806	0
ENSG00000067334	30836	DNTTIP2	0.311984	0.474875	0.490753	0.806102	0
ENSG00000023909	2730	GCLM	0.233991	0.256894	0.612262	0.851459	0
ENSG00000198691	24	ABCA4	-1.25782	3.86368	0.0493419	0.300502	0
ENSG00000137962	9411	ARHGAP29	-0.264805	0.350741	0.553694	0.830031	0
ENSG00000117528	5825	ABCD3	0.687629	2.26929	0.13196	0.529221	0
ENSG00000224081	101928079	SLC44A3-AS1	0.356692	0.318632	0.572431	0.83654	0
ENSG00000143036	126969	SLC44A3	0.385689	0.44631	0.504093	0.811989	0
ENSG00000117519	1266	CNN3	0.772918	3.01829	0.0823305	0.412991	0
ENSG00000235501	NA	CNN3-DT	0.744103	2.16872	0.140843	0.544375	0
ENSG00000172339	199857	ALG14	0.143289	0.085641	0.769794	0.912818	0
ENSG00000152078	148534	TLCD4	-0.392368	0.571928	0.449494	0.789085	0
ENSG00000122481	25950	RWDD3	0.247184	0.221343	0.638018	0.859558	0
ENSG00000228502	NA	EEF1A1P11	0.114303	0.0412358	0.839083	0.940479	0
ENSG00000137970	653702	RPL7P9	0.201137	0.160468	0.688726	0.879926	0
ENSG00000117569	58155	PTBP2	0.240648	0.239484	0.624579	0.853469	0
ENSG00000188641	1806	DPYD	-0.0829571	0.0337932	0.854147	0.946042	0
ENSG00000228057	100420341	SEC63P1	0.575596	0.943849	0.33129	0.725584	0
ENSG00000225206	400765	MIR137HG	1.57433	4.25262	0.0391897	0.258488	0
ENSG00000162627	51375	SNX7	0.290905	0.407325	0.523331	0.82047	0
ENSG00000156869	391059	FRRS1	-0.340082	0.461596	0.496879	0.808544	0
ENSG00000162688	178	AGL	-0.1766	0.1444	0.703946	0.88631	0
ENSG00000117620	23443	SLC35A3	0.0824014	0.0312778	0.859622	0.948018	0
ENSG00000156875	64645	MFSD14A	0.373434	0.544835	0.460436	0.793505	0
ENSG00000156876	163786	SASS6	0.522018	1.08838	0.296831	0.701872	0
ENSG00000122435	54482	TRMT13	0.10214	0.0428211	0.836062	0.938966	0
ENSG00000137992	1629	DBT	0.338989	0.539764	0.462531	0.794396	0
ENSG00000224616	NA	RTCA-AS1	-0.0679421	0.0165928	0.897506	0.964688	0
ENSG00000137996	8634	RTCA	0.483515	1.08015	0.298664	0.70323	0
ENSG00000079335	8556	CDC14A	0.0826124	0.0255883	0.87291	0.953593	0
ENSG00000162694	2135	EXTL2	0.0774918	0.0285457	0.865832	0.950698	0
ENSG00000162695	148867	SLC30A7	0.160622	0.125219	0.723442	0.894222	0
ENSG00000117543	51611	DPH5	-0.368566	0.591981	0.441654	0.784183	0
ENSG00000233184	102606465	DPH5-DT	-0.639231	1.47739	0.224184	0.654413	0
ENSG00000170989	1901	S1PR1	0.409585	0.661541	0.416016	0.772519	0
ENSG00000183298	730029	RPSAP19	0.575104	1.25501	0.262597	0.682259	0
ENSG00000060718	1301	COL11A1	1.11486	6.24048	0.0124863	0.112369	0
ENSG00000185946	55599	RNPC3	0.287066	0.318637	0.572428	0.83654	0
ENSG00000240038	280	AMY2B	0.906549	2.19205	0.138724	0.539896	0
ENSG00000198890	55170	PRMT6	-1.06724	4.70046	0.0301545	0.214449	0
ENSG00000085491	29957	SLC25A24	0.67622	2.22136	0.136114	0.536022	0
ENSG00000162636	284611	EEIG2	1.32696	7.9855	0.00471534	0.0517634	0
ENSG00000134186	55119	PRPF38B	0.0464599	0.0104613	0.918534	0.973199	0
ENSG00000116266	6814	STXBP3	0.397137	0.761239	0.382941	0.754744	0
ENSG00000162641	254268	AKNAD1	1.69326	7.96542	0.00476794	0.0521952	0
ENSG00000121957	29899	GPSM2	0.230014	0.256335	0.612649	0.851459	0
ENSG00000121940	23155	CLCC1	0.259894	0.327643	0.56705	0.834713	0
ENSG00000085433	22911	WDR47	1.0396	4.98429	0.0255785	0.191607	0
ENSG00000244716	100132742	RPL17P7	0.404922	0.494563	0.481899	0.801507	0
ENSG00000197780	6884	TAF13	0.745007	2.62658	0.105088	0.471379	0
ENSG00000273382	NA	TMEM167B-DT	-1.10462	3.66709	0.0554971	0.323103	0
ENSG00000215717	56900	TMEM167B	0.287378	0.40675	0.523624	0.820528	0
ENSG00000116299	57535	ELAPOR1	-0.0482458	0.00810721	0.928255	0.975871	0
ENSG00000031698	6301	SARS1	0.108119	0.0589116	0.808224	0.927907	0
ENSG00000143126	1952	CELSR2	0.526975	1.15317	0.282886	0.691939	0
ENSG00000134222	84722	PSRC1	0.399461	0.672005	0.412353	0.770762	0
ENSG00000134243	6272	SORT1	0.994719	4.83787	0.0278412	0.204233	0
ENSG00000143106	5686	PSMA5	0.670813	2.24877	0.133721	0.532546	0
ENSG00000143028	284612	SYPL2	0.961299	4.68168	0.0304859	0.216317	0
ENSG00000162650	127002	ATXN7L2	0.57531	1.55093	0.212998	0.640908	0
ENSG00000174151	284613	CYB561D1	0.570348	1.49023	0.22218	0.651588	0
ENSG00000181754	57463	AMIGO1	-0.26167	0.276346	0.599106	0.847759	0
ENSG00000065135	2773	GNAI3	0.423822	0.893168	0.34462	0.733842	0
ENSG00000116337	271	AMPD2	0.0966374	0.0463287	0.829579	0.936499	0
ENSG00000168765	2948	GSTM4	-0.036814	0.0061838	0.937321	0.978759	0
ENSG00000213366	2946	GSTM2	-0.249238	0.265728	0.606212	0.850165	0
ENSG00000134184	2944	GSTM1	-0.819375	1.29654	0.254846	0.676736	0
ENSG00000184371	1435	CSF1	-0.900604	3.92253	0.0476432	0.293634	0
ENSG00000168710	10768	AHCYL1	0.355621	0.635187	0.425459	0.776979	0
ENSG00000143093	85369	STRIP1	-0.0514761	0.0126232	0.910544	0.969984	0
ENSG00000258634	NA		-0.207771	0.182665	0.669093	0.871864	0
ENSG00000156150	257	ALX3	-1.08733	4.78463	0.0287149	0.208301	0
ENSG00000197106	388662	SLC6A17	-0.991756	3.46277	0.0627652	0.349689	0
ENSG00000116396	3749	KCNC4	-0.38996	0.599713	0.438688	0.783581	0
ENSG00000162775	64783	RBM15	0.858839	3.12325	0.0771827	0.397628	0
ENSG00000224699	101410535	LAMTOR5-AS1	1.1874	3.2302	0.0722917	0.382645	0
ENSG00000168679	9122	SLC16A4	-0.44081	0.792602	0.373314	0.751855	0
ENSG00000134248	10542	LAMTOR5	0.294078	0.412289	0.52081	0.819895	0
ENSG00000261654	NA		1.32606	4.22698	0.0397862	0.261087	0
ENSG00000121931	55791	LRIF1	0.208005	0.200215	0.654547	0.866797	0
ENSG00000273010	NA		1.73244	7.41091	0.00648296	0.0669182	0
ENSG00000156171	128338	DRAM2	0.253399	0.305053	0.580732	0.84	0
ENSG00000134255	10390	CEPT1	0.446265	0.919304	0.337658	0.729589	0
ENSG00000162777	79961	DENND2D	-0.97241	1.47073	0.22523	0.655196	0
ENSG00000085465	5016	OVGP1	-0.141588	0.0589863	0.808105	0.927907	0
ENSG00000260948	NA		0.394605	0.463521	0.495983	0.808318	0
ENSG00000116455	79084	WDR77	0.718684	2.2593	0.132814	0.531224	0
ENSG00000116459	515	ATP5PB	0.612063	1.84792	0.174025	0.597989	0
ENSG00000116473	5906	RAP1A	0.672862	2.21403	0.136761	0.536529	0
ENSG00000197852	55924	INKA2	1.07129	4.92804	0.0264243	0.196354	0
ENSG00000064703	11218	DDX20	0.613893	1.76499	0.184003	0.610791	0
ENSG00000143079	55917	CTTNBP2NL	0.132682	0.0864661	0.768719	0.912818	0
ENSG00000134245	7482	WNT2B	0.741097	1.91991	0.165867	0.585953	0
ENSG00000007341	54879	ST7L	0.0963306	0.0386326	0.844178	0.94263	0
ENSG00000116489	829	CAPZA1	0.540412	1.47069	0.225236	0.655196	0
ENSG00000155363	4343	MOV10	0.192108	0.179578	0.671736	0.873077	0
ENSG00000155366	389	RHOC	0.667145	2.20869	0.137235	0.537203	0
ENSG00000155367	333926	PPM1J	-0.553992	0.750434	0.386339	0.756566	0
ENSG00000155380	6566	SLC16A1	0.969031	4.59712	0.0320257	0.223711	0
ENSG00000226419	100506392	SLC16A1-AS1	0.215815	0.183545	0.668344	0.871606	0
ENSG00000238198	100996251	LRIG2-DT	-0.297079	0.196674	0.657419	0.867665	0
ENSG00000198799	9860	LRIG2	-0.194847	0.169838	0.680256	0.876996	0
ENSG00000081026	260425	MAGI3	-0.0960594	0.039504	0.842454	0.941934	0
ENSG00000116793	10745	PHTF1	-0.417233	0.781211	0.376771	0.752647	0
ENSG00000081019	54665	RSBN1	-0.079214	0.0286378	0.865618	0.950698	0
ENSG00000134242	26191	PTPN22	0.965737	1.30804	0.25275	0.675297	0
ENSG00000134262	10717	AP4B1	0.465745	0.909745	0.340182	0.730765	0
ENSG00000118655	64858	DCLRE1B	0.169897	0.124885	0.723796	0.894284	0
ENSG00000163349	204851	HIPK1	0.419403	0.868301	0.351426	0.737892	0
ENSG00000197323	51592	TRIM33	0.45074	0.982992	0.321461	0.719537	0
ENSG00000116752	10286	BCAS2	0.426698	0.850439	0.356428	0.741826	0
ENSG00000175984	163259	DENND2C	0.119891	0.0558948	0.813106	0.929859	0
ENSG00000213281	4893	NRAS	0.284213	0.397568	0.528348	0.821683	0
ENSG00000009307	7812	CSDE1	0.461742	1.09756	0.294802	0.700484	0
ENSG00000052723	80143	SIKE1	0.712792	2.42035	0.119768	0.503089	0
ENSG00000228035	112840934	NGF-AS1	1.22112	1.18481	0.276378	0.689037	0
ENSG00000134259	4803	NGF	1.0137	4.21645	0.0400338	0.262405	0
ENSG00000173218	81839	VANGL1	0.462984	1.0232	0.311762	0.712207	0
ENSG00000163393	55356	SLC22A15	0.628128	1.54368	0.214071	0.641928	0
ENSG00000163399	476	ATP1A1	0.710103	2.56514	0.109243	0.479626	0
ENSG00000116815	965	CD58	0.0484102	0.010072	0.920059	0.973528	0
ENSG00000143061	3321	IGSF3	-1.66729	7.89406	0.00495975	0.0538824	0
ENSG00000116830	8458	TTF2	0.535506	1.27722	0.258416	0.679449	0
ENSG00000134253	80263	TRIM45	0.371413	0.543448	0.461007	0.794075	0
ENSG00000198162	10905	MAN1A2	0.141626	0.0999811	0.751852	0.906354	0
ENSG00000183508	54855	TENT5C	-0.232231	0.255491	0.613235	0.851459	0
ENSG00000196505	54834	GDAP2	0.294569	0.381827	0.536627	0.824703	0
ENSG00000065183	10885	WDR3	0.598631	1.72963	0.188458	0.616427	0
ENSG00000092607	6913	TBX15	-1.01461	4.35592	0.0368804	0.248152	0
ENSG00000116874	10352	WARS2	-0.110388	0.0511279	0.821112	0.932827	0
ENSG00000231365	101929147	WARS2-AS1	-1.08022	4.46655	0.0345647	0.236716	0
ENSG00000260941	644242	LINC00622	-0.300044	0.235349	0.627586	0.854766	0
ENSG00000143067	90874	ZNF697	0.385009	0.678261	0.410186	0.77023	0
ENSG00000092621	26227	PHGDH	0.405006	0.824492	0.36387	0.746159	0
ENSG00000134250	4853	NOTCH2	-0.341876	0.597686	0.439462	0.78417	0
ENSG00000265808	9554	SEC22B	0.11225	0.0625681	0.802482	0.925204	0
ENSG00000270231	728841	NBPF8	-0.230884	0.211009	0.645978	0.863344	0
ENSG00000275131	NA	PDE4DIPP2	-0.106678	0.0408927	0.839745	0.940808	0
ENSG00000273136	101060684	NBPF26	-0.320668	0.403547	0.525263	0.820711	0
ENSG00000226067	NA	LINC00623	-0.241123	0.12592	0.722701	0.894105	0
ENSG00000188610	653820	FAM72B	0.404132	0.50466	0.47746	0.800397	0
ENSG00000171943	653464	SRGAP2C	0.217658	0.1912	0.66192	0.868953	0
ENSG00000227082	107985194	LINC02798	-0.905776	1.9935	0.157976	0.572116	0
ENSG00000263513	554282	FAM72C	0.00222618	6.27332e-06	0.998002	0.999081	0
ENSG00000270872	NA	SRGAP2D	0.449072	0.636236	0.425077	0.776732	0
ENSG00000232527	100996732,107985200	LINC02802,LOC107985200	-0.584218	0.934647	0.333658	0.726978	0
ENSG00000266338	284565	NBPF15	0.112144	0.0562215	0.812571	0.929708	0
ENSG00000196369	647135	SRGAP2B	0.192921	0.13342	0.714912	0.890485	0
ENSG00000215784	728833	FAM72D	1.10726	2.54851	0.110398	0.482499	0
ENSG00000272419	NA	LINC01145	-0.487087	0.859203	0.353962	0.739933	0
ENSG00000223612	NA		0.00959931	0.000324021	0.985638	0.995994	0
ENSG00000162825	100288142	NBPF20	-0.280534	0.253151	0.614865	0.851459	0
ENSG00000272150	101929780	NBPF25P	0.210314	0.142771	0.705542	0.886639	0
ENSG00000117262	653519	GPR89A	0.193926	0.138968	0.709309	0.888246	0
ENSG00000265491	27246	RNF115	0.238092	0.2749	0.600063	0.848046	0
ENSG00000186141	10623	POLR3C	0.429353	0.874042	0.349839	0.736448	0
ENSG00000186364	200035	NUDT17	-0.530857	1.00426	0.316282	0.716733	0
ENSG00000131788	10401	PIAS3	0.389279	0.744703	0.388158	0.757865	0
ENSG00000143127	8515	ITGA10	-0.711646	1.68605	0.194122	0.620759	0
ENSG00000131779	8799	PEX11B	0.0148873	0.000988404	0.97492	0.992523	0
ENSG00000265241	9939	RBM8A	0.269813	0.357166	0.550085	0.828891	0
ENSG00000211451	114814	GNRHR2	-0.439299	0.442218	0.506054	0.812991	0
ENSG00000271601	128077	LIX1L	-0.039044	0.00743985	0.931264	0.977038	0
ENSG00000272031	284615	ANKRD34A	0.98949	3.76262	0.0524104	0.310934	0
ENSG00000121851	84265	POLR3GL	0.280998	0.351447	0.553295	0.830031	0
ENSG00000265972	10628	TXNIP	-0.190838	0.185971	0.666291	0.870695	0
ENSG00000271425	100132406	NBPF10	-0.42288	0.681476	0.409079	0.769671	0
ENSG00000264343	388677	NOTCH2NLA	-1.3606	3.75948	0.0525088	0.311	0
ENSG00000277406	NA	SEC22B4P	0.617227	0.901142	0.342476	0.732337	0
ENSG00000287978	100996756	LOC100996756	0.0972002	0.0293772	0.863911	0.949809	0
ENSG00000268043	149013	NBPF12	-0.225189	0.20712	0.649034	0.864299	0
ENSG00000131791	5565	PRKAB2	0.403698	0.773082	0.379265	0.753501	0
ENSG00000180867	NA	PDIA3P1	0.145831	0.0844238	0.77139	0.912818	0
ENSG00000131781	2330	FMO5	-1.47171	6.09599	0.0135489	0.119472	0
ENSG00000226015	644131	CCT8P1	-0.443021	0.446314	0.50409	0.811989	0
ENSG00000131778	9557	CHD1L	0.366526	0.462597	0.496413	0.808392	0
ENSG00000116128	607	BCL9	-0.187783	0.163797	0.685685	0.879884	0
ENSG00000162836	51205	ACP6	-0.127895	0.0641095	0.800115	0.924356	0
ENSG00000265107	2702	GJA5	1.19463	5.24168	0.0220519	0.172158	0
ENSG00000188092	51463	GPR89B	0.479837	0.785339	0.375513	0.751855	0
ENSG00000263956	200030	NBPF11	0.0448278	0.00777039	0.929758	0.976135	0
ENSG00000274020	388685	LINC01138	-1.62891	7.80997	0.00519589	0.0558691	0
ENSG00000270629	25832	NBPF14	-0.42064	0.726534	0.394009	0.762662	0
ENSG00000178104	9659	PDE4DIP	0.170743	0.141967	0.706333	0.886639	0
ENSG00000269713	400818	NBPF9	-0.0629576	0.0176191	0.894401	0.963813	0
ENSG00000274265	NA		-0.151305	0.0882819	0.766373	0.912144	0
ENSG00000286219	100996717	NOTCH2NLC	-0.772308	1.55307	0.212683	0.64045	0
ENSG00000220323	337874	H2BC19P	0.856946	2.53949	0.111031	0.483963	0
ENSG00000261716	337873	H2BC20P	1.04574	3.98772	0.0458331	0.285964	0
ENSG00000184678	8349	H2BC21	1.13852	5.22024	0.0223254	0.173948	0
ENSG00000178096	51027	BOLA1	-0.585222	1.28921	0.256194	0.677935	0
ENSG00000159164	9900	SV2A	-0.413323	0.811042	0.367812	0.749101	0
ENSG00000143368	10262	SF3B4	0.326342	0.527603	0.467617	0.795518	0
ENSG00000014914	10903	MTMR11	-0.599257	1.50698	0.219601	0.647646	0
ENSG00000264522	56957	OTUD7B	-0.00171086	1.39841e-05	0.997016	0.998884	0
ENSG00000285184	NA		0.147202	0.0668672	0.795954	0.922811	0
ENSG00000136631	11311	VPS45	0.58979	1.61107	0.204342	0.630789	0
ENSG00000023902	51177	PLEKHO1	0.246935	0.292909	0.588363	0.84379	0
ENSG00000143401	81611	ANP32E	0.521615	1.32799	0.249163	0.67398	0
ENSG00000117362	51107	APH1A	-0.0102205	0.000518697	0.98183	0.995145	0
ENSG00000118292	79630	C1orf54	-0.266168	0.287314	0.591947	0.844979	0
ENSG00000159208	148523	CIART	0.178105	0.119029	0.73009	0.897168	0
ENSG00000117360	9129	PRPF3	0.547749	1.4073	0.235506	0.665339	0
ENSG00000163125	23248	RPRD2	0.0143245	0.0010063	0.974694	0.992421	0
ENSG00000143374	80222	TARS2	0.076846	0.0253954	0.873386	0.953838	0
ENSG00000143369	1893	ECM1	-0.59281	1.78452	0.181595	0.608191	0
ENSG00000143382	54507	ADAMTSL4	-0.614244	1.8384	0.175138	0.599196	0
ENSG00000143384	4170,574406	MCL1,ADAMTSL4-AS1	0.0816974	0.0341792	0.853326	0.945846	0
ENSG00000143420	2029	ENSA	0.231947	0.26464	0.60695	0.850235	0
ENSG00000143457	55204	GOLPH3L	0.0842753	0.0334187	0.854949	0.946127	0
ENSG00000143387	1513	CTSK	-0.665378	2.23372	0.135028	0.534537	0
ENSG00000143437	405	ARNT	0.0582464	0.0167486	0.897028	0.964688	0
ENSG00000143379	9869	SETDB1	0.228863	0.246915	0.619256	0.851754	0
ENSG00000143418	29956	CERS2	0.485306	1.17585	0.278202	0.689037	0
ENSG00000259357	NA		0.570663	0.715616	0.397586	0.764104	0
ENSG00000143412	8416	ANXA9	1.19871	1.14395	0.28482	0.692114	0
ENSG00000143409	55793	MINDY1	0.21425	0.192176	0.661112	0.868472	0
ENSG00000143363	58497	PRUNE1	0.236403	0.254066	0.614227	0.851459	0
ENSG00000143443	54964	C1orf56	-0.425645	0.698427	0.403313	0.766155	0
ENSG00000197622	56882	CDC42SE1	0.716225	2.50045	0.113814	0.490181	0
ENSG00000213190	10962	MLLT11	0.966592	3.90099	0.0482576	0.295579	0
ENSG00000143458	126626	GABPB2	-0.503853	1.0527	0.304887	0.706756	0
ENSG00000261168	NA		0.0385481	0.00348933	0.952896	0.985023	0
ENSG00000143434	10500	SEMA6C	0.238907	0.223345	0.636503	0.858892	0
ENSG00000163156	79005,100534012	SCNM1,TNFAIP8L2-SCNM1	0.13577	0.0828032	0.773534	0.913548	0
ENSG00000163155	388695	LYSMD1	0.0438344	0.00762085	0.930435	0.976625	0
ENSG00000163157	29765	TMOD4	0.51598	0.626978	0.428466	0.778494	0
ENSG00000163159	6944	VPS72	0.259572	0.323031	0.569792	0.83557	0
ENSG00000143398	8394	PIP5K1A	0.299587	0.445137	0.504653	0.812402	0
ENSG00000159352	5710	PSMD4	0.371183	0.679927	0.409612	0.769889	0
ENSG00000232671	100507670	ZNF687-AS1	0.47846	0.500009	0.479496	0.801188	0
ENSG00000143373	57592	ZNF687	0.256663	0.314519	0.57492	0.837987	0
ENSG00000143393	5298	PI4KB	0.0275141	0.00374177	0.951224	0.984325	0
ENSG00000143390	5993	RFX5	0.32652	0.492638	0.482753	0.801921	0
ENSG00000143416	8991	SELENBP1	0.641998	1.90188	0.167868	0.589184	0
ENSG00000159377	5692	PSMB4	0.17632	0.154555	0.69422	0.882855	0
ENSG00000143442	23126	POGZ	0.076281	0.028474	0.865999	0.950798	0
ENSG00000143376	81609	SNX27	0.096848	0.0443117	0.833275	0.937916	0
ENSG00000143436	65005	MRPL9	0.34476	0.562315	0.453329	0.790787	0
ENSG00000143450	51686	OAZ3	-0.493725	0.568492	0.450859	0.789664	0
ENSG00000159445	117145	THEM4	0.564539	1.36986	0.241836	0.66954	0
ENSG00000197747	6281	S100A10	0.215598	0.236539	0.626717	0.854681	0
ENSG00000163191	6282	S100A11	0.457835	1.07076	0.300773	0.704602	0
ENSG00000197956	6277	S100A6	0.223143	0.259872	0.610208	0.851294	0
ENSG00000196154	6275	S100A4	0.997314	4.99773	0.0253806	0.190488	0
ENSG00000188015	6274	S100A3	1.03506	4.08286	0.0433202	0.27586	0
ENSG00000196754	6273	S100A2	-0.400485	0.516111	0.472505	0.798343	0
ENSG00000285867	NA		-0.487401	0.815188	0.366591	0.74848	0
ENSG00000188643	140576	S100A16	0.380723	0.719919	0.396171	0.76398	0
ENSG00000189171	6284	S100A13	0.254336	0.305992	0.58015	0.84	0
ENSG00000272030	NA		-0.665996	1.08264	0.298107	0.703183	0
ENSG00000160679	26097	CHTOP	0.42465	0.876037	0.349289	0.736448	0
ENSG00000143553	23557	SNAPIN	-0.030266	0.00411147	0.948874	0.983766	0
ENSG00000143621	3608	ILF2	0.49176	1.19944	0.273433	0.688413	0
ENSG00000143624	65123	INTS3	-0.348658	0.587391	0.44343	0.784833	0
ENSG00000143554	11000	SLC27A3	-0.0217348	0.00204122	0.963964	0.989115	0
ENSG00000143614	57459	GATAD2B	-0.0132048	0.000853613	0.976692	0.993363	0
ENSG00000198837	9909	DENND4B	0.490643	1.13214	0.287319	0.693436	0
ENSG00000160741	200186	CRTC2	0.254657	0.310388	0.577442	0.838989	0
ENSG00000143570	27173	SLC39A1	0.177221	0.0996626	0.752235	0.906416	0
ENSG00000282386	NA		0.983773	2.35558	0.124835	0.515024	0
ENSG00000273026	NA		0.408082	0.286544	0.592444	0.845133	0
ENSG00000143578	148327	CREB3L4	-0.0434087	0.00726417	0.932078	0.977335	0
ENSG00000143543	10899	JTB	0.104816	0.0500392	0.822995	0.933622	0
ENSG00000285641	NA		-1.00227	2.0227	0.154964	0.567443	0
ENSG00000143545	5872	RAB13	-0.791662	2.90498	0.0883064	0.429747	0
ENSG00000177954	6232	RPS27	0.471878	1.14257	0.285109	0.692114	0
ENSG00000143549	7170	TPM3	0.501758	1.27976	0.257943	0.678999	0
ENSG00000143612	25912	C1orf43	0.394827	0.773323	0.379191	0.753501	0
ENSG00000143569	9898	UBAP2L	0.425116	0.910975	0.339856	0.730765	0
ENSG00000143575	10456	HAX1	0.21156	0.216866	0.641439	0.861737	0
ENSG00000143515	57198	ATP8B2	-0.100777	0.0507282	0.821801	0.933142	0
ENSG00000160712	3570	IL6R	0.257176	0.246849	0.619303	0.851754	0
ENSG00000160714	55585	UBE2Q1	0.568187	1.58598	0.207901	0.634553	0
ENSG00000160710	103	ADAR	0.620265	1.9553	0.162017	0.578721	0
ENSG00000163344	10654	PMVK	-0.138321	0.0822678	0.774247	0.913788	0
ENSG00000163346	57326	PBXIP1	0.21563	0.231681	0.63028	0.855921	0
ENSG00000163348	90780	PYGO2	0.0445401	0.00941377	0.922707	0.974168	0
ENSG00000271380	NA		-0.539583	0.76013	0.383288	0.754744	0
ENSG00000160691	6464	SHC1	0.353692	0.637896	0.424474	0.775983	0
ENSG00000173207	1163	CKS1B	0.364229	0.578492	0.446904	0.787274	0
ENSG00000160688	80308	FLAD1	0.288614	0.364525	0.546004	0.827991	0
ENSG00000160685	51043	ZBTB7B	0.664205	2.10176	0.147129	0.555434	0
ENSG00000232093	NA	DCST1-AS1	1.13244	2.67168	0.102148	0.467763	0
ENSG00000143537	8751	ADAM15	0.690859	2.33665	0.126361	0.518464	0
ENSG00000243364	1945	EFNA4	0.0804294	0.0257665	0.872472	0.953314	0
ENSG00000143590	1944	EFNA3	0.757312	1.88379	0.169904	0.591843	0
ENSG00000169241	55974	SLC50A1	0.607847	1.66622	0.196766	0.622894	0
ENSG00000179085	54344	DPM3	-0.17017	0.117525	0.731734	0.897613	0
ENSG00000163463	200185	KRTCAP2	-0.0554644	0.0112465	0.915543	0.971697	0
ENSG00000163462	80128	TRIM46	0.133345	0.0659973	0.797256	0.923548	0
ENSG00000185499	4582	MUC1	0.318626	0.468751	0.493562	0.807705	0
ENSG00000231064	105371450	THBS3-AS1	-1.01588	3.22198	0.0726559	0.383798	0
ENSG00000169231	7059	THBS3	-0.0703454	0.0228703	0.879795	0.957691	0
ENSG00000173171	4580	MTX1	0.283555	0.349405	0.55445	0.830611	0
ENSG00000160766	2630	GBAP1	-0.555832	1.04362	0.306981	0.708101	0
ENSG00000177628	2629	GBA1	-0.47411	1.08215	0.298218	0.703217	0
ENSG00000160767	10712	ENTREP3	-0.247381	0.290235	0.59007	0.844907	0
ENSG00000116521	10067	SCAMP3	0.251954	0.306713	0.579704	0.839794	0
ENSG00000176444	1196	CLK2	0.155186	0.111542	0.738395	0.900217	0
ENSG00000143630	57657	HCN3	0.134284	0.0649601	0.798821	0.924064	0
ENSG00000160752	2224	FDPS	0.761847	2.81342	0.0934787	0.445475	0
ENSG00000225855	284618	RUSC1-AS1	-0.36657	0.378204	0.538566	0.825185	0
ENSG00000160753	23623	RUSC1	0.139858	0.0870695	0.767936	0.912419	0
ENSG00000116539	55870	ASH1L	-0.0577044	0.0165025	0.897783	0.964688	0
ENSG00000235919	645676	ASH1L-AS1	0.645591	1.09405	0.295576	0.700735	0
ENSG00000125459	55154	MSTO1	-0.233754	0.217759	0.640753	0.861474	0
ENSG00000246203	NA		-0.986159	2.16893	0.140824	0.544375	0
ENSG00000287839	NA		-0.435074	0.4876	0.485	0.803704	0
ENSG00000163374	55249	YY1AP1	0.27496	0.364503	0.546016	0.827991	0
ENSG00000132676	7818	DAP3	0.252923	0.312731	0.576009	0.838379	0
ENSG00000203761	NA	MSTO2P	-0.358487	0.348771	0.55481	0.830676	0
ENSG00000116580	54856	GON4L	0.360061	0.623435	0.429774	0.779273	0
ENSG00000132718	23208	SYT11	1.03236	5.17515	0.0229122	0.177465	0
ENSG00000143622	6016	RIT1	0.227068	0.241897	0.622839	0.852838	0
ENSG00000132680	22889	KHDC4	0.286806	0.360259	0.548363	0.828616	0
ENSG00000116584	9181	ARHGEF2	0.376839	0.708589	0.399913	0.764907	0
ENSG00000273002	107985209	ARHGEF2-AS2	0.930355	1.98211	0.159168	0.574021	0
ENSG00000163479	6746	SSR2	0.0394598	0.00786193	0.929346	0.976135	0
ENSG00000160803	56893	UBQLN4	0.538557	1.38432	0.239367	0.66681	0
ENSG00000116586	28956	LAMTOR2	0.332395	0.499353	0.479784	0.801188	0
ENSG00000254726	92312	MEX3A	-0.173751	0.120514	0.728478	0.896685	0
ENSG00000160789	4000	LMNA	0.30998	0.500548	0.479259	0.801188	0
ENSG00000196189	64218	SEMA4A	-0.543594	0.953965	0.328712	0.723921	0
ENSG00000160785	9673	SLC25A44	0.413091	0.811258	0.367748	0.749101	0
ENSG00000260238	100527963	PMF1-BGLAP	-0.992375	2.25477	0.133204	0.531978	0
ENSG00000160783	11243	PMF1	-0.0390021	0.00649006	0.935791	0.978265	0
ENSG00000198952	23381	SMG5	0.154703	0.117313	0.731967	0.897613	0
ENSG00000163472	84283	TMEM79	0.224681	0.191038	0.662054	0.868984	0
ENSG00000198715	112770	GLMP	-1.11583	5.72908	0.0166862	0.139253	0
ENSG00000163468	7203	CCT3	0.604837	1.83611	0.175407	0.599501	0
ENSG00000116604	4209	MEF2D	0.41196	0.841944	0.358841	0.743558	0
ENSG00000183856	128239	IQGAP3	0.369072	0.64877	0.420553	0.774583	0
ENSG00000163382	128240	NAXE	0.456018	0.992022	0.319249	0.718446	0
ENSG00000160818	54865	GPATCH4	0.415092	0.801961	0.370508	0.7508	0
ENSG00000272068	NA	BCAN-AS1	0.588272	0.71982	0.396203	0.76398	0
ENSG00000272405	NA		0.929236	2.73844	0.0979604	0.456732	0
ENSG00000229953	NA		0.709004	1.02713	0.310834	0.711384	0
ENSG00000132688	10763	NES	0.681609	2.37076	0.123627	0.512625	0
ENSG00000143320	1382	CRABP2	0.791244	3.19134	0.0740292	0.387926	0
ENSG00000143319	81875	ISG20L2	0.262081	0.326255	0.567872	0.835116	0
ENSG00000143303	51093	METTL25B	0.147859	0.0921705	0.761436	0.909685	0
ENSG00000143314	79590	MRPL24	0.00701009	0.000225292	0.988024	0.996505	0
ENSG00000143321	3068	HDGF	0.212709	0.23135	0.630525	0.856022	0
ENSG00000143294	5546	PRCC	-0.230257	0.257366	0.611936	0.851459	0
ENSG00000187800	375033	PEAR1	-0.638622	1.97584	0.159829	0.574542	0
ENSG00000160838	149499	LRRC71	1.47219	4.93943	0.0262508	0.195509	0
ENSG00000132694	9826	ARHGEF11	-0.0220964	0.00237353	0.961143	0.988317	0
ENSG00000117036	2117	ETV3	0.466052	1.04687	0.306229	0.707418	0
ENSG00000183853	55243	KIRREL1	0.182579	0.170077	0.680043	0.876983	0
ENSG00000163565	3428	IFI16	-0.114027	0.0648123	0.799046	0.924064	0
ENSG00000158716	54935	DUSP23	0.451898	0.797711	0.371779	0.751439	0
ENSG00000272668	107985216	LOC107985216	-0.101517	0.0328963	0.856074	0.946875	0
ENSG00000213085	25790	CFAP45	0.205937	0.125092	0.723576	0.894251	0
ENSG00000158710	8407	TAGLN2	0.553023	1.56596	0.210794	0.638426	0
ENSG00000224259	100505633	LINC01133	-0.5152	1.13046	0.287677	0.693981	0
ENSG00000143315	93183	PIGM	0.229714	0.2377	0.625873	0.854208	0
ENSG00000225279	NA		-0.492914	0.58756	0.443364	0.784833	0
ENSG00000162729	93185	IGSF8	-0.196242	0.175935	0.67489	0.874738	0
ENSG00000018625	477	ATP1A2	1.27914	0.96511	0.325903	0.721597	0
ENSG00000143318	844	CASQ1	-1.60594	1.3638	0.242881	0.670243	0
ENSG00000227741	729867	LOC729867	0.413836	0.402371	0.525867	0.820824	0
ENSG00000162734	8682	PEA15	0.64006	2.09523	0.14776	0.555949	0
ENSG00000132716	50717	DCAF8	-0.0851684	0.0341577	0.853372	0.945846	0
ENSG00000228606	100287049	DCAF8-DT	0.7994	1.56419	0.211052	0.638426	0
ENSG00000162735	5824	PEX19	0.0689119	0.0228965	0.879727	0.957691	0
ENSG00000122218	1314	COPA	0.633959	2.04804	0.152402	0.564365	0
ENSG00000162736	23385	NCSTN	0.371174	0.687115	0.407147	0.768794	0
ENSG00000171786	4807	NHLH1	1.14677	3.38249	0.0658926	0.360034	0
ENSG00000213080	NA		0.603166	0.964518	0.326051	0.721597	0
ENSG00000158773	7391	USF1	0.417177	0.804457	0.369764	0.750259	0
ENSG00000143256	5202	PFDN2	0.396786	0.746559	0.387568	0.757765	0
ENSG00000158793	4817	NIT1	-0.237966	0.243218	0.621891	0.852788	0
ENSG00000158796	9191	DEDD	0.501719	1.20787	0.271754	0.687211	0
ENSG00000143222	51506	UFC1	0.12761	0.0791461	0.778458	0.915651	0
ENSG00000143258	27005	USP21	0.12601	0.070069	0.791236	0.920978	0
ENSG00000143224	5498	PPOX	-0.341237	0.462151	0.49662	0.808544	0
ENSG00000158850	8703	B4GALT3	0.276986	0.349198	0.554568	0.830611	0
ENSG00000158859	9507	ADAMTS4	-1.42505	4.3581	0.0368334	0.248042	0
ENSG00000158864	4720	NDUFS2	0.321116	0.503743	0.47786	0.800725	0
ENSG00000158882	84134	TOMM40L	-0.25351	0.265847	0.606131	0.850165	0
ENSG00000143252	6391	SDHC	0.183665	0.162856	0.686541	0.879884	0
ENSG00000283696	NA		-0.34319	0.313427	0.575585	0.838152	0
ENSG00000143226	2212	FCGR2A	-1.23178	4.36329	0.0367212	0.247605	0
ENSG00000173110	3310	HSPA6	-1.15067	3.43656	0.0637682	0.353342	0
ENSG00000244682	NA	FCGR2C	-1.09843	2.54599	0.110575	0.482913	0
ENSG00000132185	84824	FCRLA	-0.767071	1.55187	0.212859	0.640647	0
ENSG00000162746	127943	FCRLB	0.100932	0.0347355	0.852151	0.9457	0
ENSG00000081721	11266	DUSP12	0.134174	0.077974	0.780062	0.915794	0
ENSG00000118217	22926	ATF6	0.33583	0.55759	0.455233	0.791502	0
ENSG00000162745	25903	OLFML2B	-1.16788	5.61953	0.0177614	0.145675	0
ENSG00000198929	9722	NOS1AP	-2.07852	6.86027	0.00881334	0.0854764	0
ENSG00000239887	400793	C1orf226	-1.697	6.75452	0.00935105	0.0894233	0
ENSG00000152332	127933	UHMK1	0.604641	1.81827	0.177519	0.602104	0
ENSG00000117143	6675	UAP1	0.587399	1.70092	0.192167	0.619602	0
ENSG00000162733	4921	DDR2	0.140613	0.10131	0.750263	0.905578	0
ENSG00000132196	51478	HSD17B7	1.06459	4.05506	0.0440392	0.278343	0
ENSG00000185860	339512	CCDC190	1.76568	6.19774	0.0127914	0.114591	0
ENSG00000232995	8490	RGS5	0.926818	2.38012	0.122888	0.511551	0
ENSG00000143228	83540	NUF2	1.05163	4.69671	0.0302204	0.214821	0
ENSG00000185630	5087	PBX1	-0.367902	0.672253	0.412267	0.770762	0
ENSG00000269887	NA		0.105611	0.0265053	0.870672	0.952516	0
ENSG00000143198	4259	MGST3	0.39031	0.737643	0.390417	0.759723	0
ENSG00000143149	223	ALDH9A1	0.489495	1.18105	0.277141	0.689037	0
ENSG00000143183	54499	TMCO1	0.406371	0.816205	0.366292	0.748233	0
ENSG00000143179	7371	UCK2	0.967832	4.52846	0.0333356	0.230405	0
ENSG00000143157	57645	POGK	0.440009	0.94153	0.331885	0.725584	0
ENSG00000152382	117143	TADA1	0.633668	1.63114	0.201546	0.628272	0
ENSG00000225171	100873912	DUTP6	0.023746	0.00140023	0.97015	0.990582	0
ENSG00000143190	5451	POU2F1	0.22276	0.225063	0.635209	0.857911	0
ENSG00000197965	9019	MPZL1	0.75691	2.8552	0.091079	0.438094	0
ENSG00000143158	25874	MPC2	0.371971	0.646512	0.421363	0.775158	0
ENSG00000143164	55827	DCAF6	0.178047	0.15728	0.691673	0.881728	0
ENSG00000143147	23432	GPR161	-0.174574	0.147185	0.70124	0.88543	0
ENSG00000143155	261726	TIPRL	0.340737	0.567754	0.451153	0.789664	0
ENSG00000213064	375035	SFT2D2	-0.0629553	0.0193588	0.889343	0.961754	0
ENSG00000143178	9095	TBX19	-0.511355	0.911846	0.339625	0.730765	0
ENSG00000143153	481	ATP1B1	1.17535	6.36943	0.0116103	0.105951	0
ENSG00000143156	29922	NME7	0.536886	1.25614	0.262383	0.682127	0
ENSG00000117475	8548	BLZF1	0.699182	2.28798	0.13038	0.526439	0
ENSG00000117479	10560	SLC19A2	0.424648	0.708331	0.399998	0.764907	0
ENSG00000213062	NA		0.790293	1.93647	0.164052	0.58242	0
ENSG00000000460	55732	C1orf112	0.413422	0.684972	0.40788	0.768794	0
ENSG00000171806	92342	METTL18	0.379639	0.551913	0.457537	0.792585	0
ENSG00000000457	57147	SCYL3	-0.290442	0.356867	0.550251	0.828891	0
ENSG00000075945	22920	KIFAP3	0.527329	1.32889	0.249002	0.67398	0
ENSG00000120370	92344	GORAB	0.224141	0.221784	0.637684	0.859483	0
ENSG00000116132	5396	PRRX1	-0.393129	0.775755	0.378443	0.753346	0
ENSG00000271811	NA		0.0707512	0.0124231	0.911253	0.970122	0
ENSG00000231424	NA		-0.633182	1.2414	0.265201	0.68408	0
ENSG00000285665	NA	TOP1P1	1.71451	6.97899	0.00824722	0.0809339	0
ENSG00000117523	23215	PRRC2C	0.225717	0.259586	0.610404	0.851341	0
ENSG00000117533	8674	VAMP4	-0.369224	0.629855	0.427409	0.778362	0
ENSG00000010165	51603	METTL13	-0.185445	0.157388	0.691573	0.881728	0
ENSG00000197959	26052	DNM3	-0.63169	1.20271	0.272781	0.687458	0
ENSG00000230630	NA	DNM3OS	1.06282	4.87553	0.0272402	0.200992	0
ENSG00000135845	5279	PIGC	0.439723	0.884812	0.346887	0.734795	0
ENSG00000094975	51430	SUCO	0.325655	0.51012	0.475087	0.799571	0
ENSG00000117586	7292	TNFSF4	1.30279	5.62671	0.0176888	0.145293	0
ENSG00000203739	101928673	PRDX6-AS1	0.58247	1.14658	0.284266	0.692114	0
ENSG00000076321	27252	KLHL20	0.388383	0.715656	0.397572	0.764104	0
ENSG00000120334	91687	CENPL	0.585469	1.45549	0.227649	0.6586	0
ENSG00000117593	55157	DARS2	0.796771	2.8452	0.0916473	0.44008	0
ENSG00000234741	60674	GAS5	-0.00822805	0.000337728	0.985338	0.995994	0
ENSG00000270084	NA	GAS5-AS1	-0.654517	1.24862	0.263816	0.683354	0
ENSG00000185278	84614	ZBTB37	0.362627	0.540116	0.462385	0.794396	0
ENSG00000135870	149041	RC3H1	0.432238	0.895102	0.344099	0.73357	0
ENSG00000152061	9910	RABGAP1L	0.502274	1.18269	0.276809	0.689037	0
ENSG00000116161	27101	CACYBP	0.61232	1.80379	0.179255	0.604293	0
ENSG00000120333	63931	MRPS14	0.23606	0.253666	0.614505	0.851459	0
ENSG00000235750	9674	KIAA0040	1.21832	6.13292	0.0132687	0.11786	0
ENSG00000143207	64326	COP1	-0.06863	0.0221542	0.881678	0.958578	0
ENSG00000242193	730102	CRYZL2P	-1.18982	5.1108	0.0237773	0.182341	0
ENSG00000224687	100302401	RASAL2-AS1	1.33834	5.43721	0.0197121	0.157807	0
ENSG00000075391	9462	RASAL2	1.0309	5.10042	0.02392	0.183107	0
ENSG00000213058	NA		0.237838	0.230557	0.631111	0.85638	0
ENSG00000213057	400798	C1orf220	-0.220408	0.144727	0.703626	0.886228	0
ENSG00000273384	NA		-0.248347	0.168031	0.681867	0.877854	0
ENSG00000273062	NA	RALGPS2-AS1	0.700942	0.808716	0.3685	0.749276	0
ENSG00000116191	55103	RALGPS2	0.701734	2.41027	0.120542	0.505125	0
ENSG00000116199	9917	FAM20B	0.491509	1.19363	0.274598	0.688848	0
ENSG00000186283	64222	TOR3A	0.133766	0.0837345	0.772299	0.913118	0
ENSG00000143322	27	ABL2	0.50602	1.23679	0.266091	0.684808	0
ENSG00000057252	6646	SOAT1	0.225541	0.239225	0.624766	0.853513	0
ENSG00000169905	163590	TOR1AIP2	0.182729	0.164908	0.684677	0.879453	0
ENSG00000272906	NA		1.12825	3.4566	0.0629997	0.350441	0
ENSG00000143337	26092	TOR1AIP1	0.545897	1.47162	0.225091	0.655196	0
ENSG00000135837	9857	CEP350	-0.0180396	0.00159182	0.968175	0.989948	0
ENSG00000116260	5768	QSOX1	0.291198	0.434514	0.509782	0.814993	0
ENSG00000230124	84320,100527964	ACBD6,LHX4-AS1	-0.0980474	0.0461439	0.829914	0.936528	0
ENSG00000143324	9213	XPR1	0.373458	0.6659	0.414485	0.771927	0
ENSG00000135835	57710	KIAA1614	-0.547775	1.26794	0.260154	0.680991	0
ENSG00000243155	NA		0.649052	1.2452	0.26447	0.683792	0
ENSG00000232586	103344928	KIAA1614-AS1	1.45735	5.70417	0.0169246	0.140576	0
ENSG00000135823	10228	STX6	0.508753	1.25289	0.263001	0.682491	0
ENSG00000153029	3140	MR1	0.0169338	0.00139162	0.970242	0.990582	0
ENSG00000162783	51278	IER5	-0.407333	0.811111	0.367792	0.749101	0
ENSG00000135821	2752	GLUL	-0.0473709	0.0114006	0.914969	0.9716	0
ENSG00000135828	6041	RNASEL	0.117076	0.0619103	0.803502	0.925592	0
ENSG00000261504	284648	LINC01686	1.82454	6.99947	0.00815339	0.0801631	0
ENSG00000287808	NA	DHX9-AS1	1.64407	4.63462	0.031333	0.220569	0
ENSG00000135829	1660	DHX9	0.362539	0.660397	0.41642	0.772519	0
ENSG00000135862	3915	LAMC1	0.561333	1.63823	0.200568	0.627022	0
ENSG00000116698	9887	SMG7	0.513403	1.29951	0.254302	0.675976	0
ENSG00000162704	10092	ARPC5	0.649707	2.13285	0.144172	0.550835	0
ENSG00000143344	23179	RGL1	-0.352209	0.592372	0.441503	0.784183	0
ENSG00000198756	23127	COLGALT2	-0.911116	2.19205	0.138725	0.539896	0
ENSG00000198860	116461	TSEN15	0.680641	2.21978	0.136253	0.536022	0
ENSG00000116667	81563	C1orf21	-1.06331	4.87056	0.0273186	0.201476	0
ENSG00000116406	80267	EDEM3	-0.457916	1.00775	0.315442	0.715803	0
ENSG00000135842	116496	NIBAN1	-0.0279765	0.00392458	0.950048	0.984144	0
ENSG00000121481	6045	RNF2	0.0470175	0.0101687	0.919678	0.973295	0
ENSG00000121486	81627	TRMT1L	-0.00705571	0.000218844	0.988197	0.996505	0
ENSG00000116668	54823	SWT1	0.447742	0.759798	0.383392	0.754744	0
ENSG00000279838	NA		0.648569	0.928021	0.335378	0.728194	0
ENSG00000116679	10625	IVNS1ABP	0.712222	2.47978	0.115319	0.493896	0
ENSG00000273004	NA		1.21504	3.03322	0.0815762	0.410779	0
ENSG00000143341	83872	HMCN1	-0.353309	0.596879	0.439771	0.78417	0
ENSG00000047410	7175	TPR	0.528737	1.39872	0.236939	0.665351	0
ENSG00000157181	54953	ODR4	0.0334761	0.00508085	0.943175	0.981028	0
ENSG00000073756	5743	PTGS2	-1.13049	6.1085	0.0134533	0.11903	0
ENSG00000231767	100271374	RPS27AP5	-0.276155	0.199987	0.654731	0.866863	0
ENSG00000116741	5997	RGS2	-0.390302	0.709015	0.399771	0.764781	0
ENSG00000116750	51377	UCHL5	0.469156	1.03613	0.308723	0.709924	0
ENSG00000116747	6738	RO60	0.565086	1.54891	0.213296	0.641298	0
ENSG00000023572	51022	GLRX2	0.94706	3.86099	0.0494211	0.300868	0
ENSG00000134371	79577	CDC73	0.528379	1.35973	0.243584	0.670947	0
ENSG00000162630	8707	B3GALT2	0.936287	3.53612	0.0600458	0.340267	0
ENSG00000232077	101929184	LINC01031	2.27087	6.88429	0.00869565	0.0848055	0
ENSG00000066279	259266	ASPM	0.381663	0.713124	0.398409	0.764234	0
ENSG00000177888	360023	ZBTB41	0.497729	1.16959	0.279485	0.689876	0
ENSG00000213047	163486	DENND1B	0.580192	1.51326	0.218642	0.646685	0
ENSG00000203724	388722	C1orf53	-0.146132	0.0793921	0.778123	0.915604	0
ENSG00000143355	56956	LHX9	0.313005	0.480306	0.488284	0.805263	0
ENSG00000151414	140609	NEK7	0.905423	4.12226	0.0423225	0.272971	0
ENSG00000116833	2494	NR5A2	-1.00238	3.30779	0.0689523	0.370327	0
ENSG00000203721	554279	LINC00862	1.88889	6.5986	0.0102059	0.0956895	0
ENSG00000162702	23528	ZNF281	1.05802	5.41766	0.0199341	0.159098	0
ENSG00000282849	NA		0.485324	0.187843	0.664718	0.870049	0
ENSG00000118193	9928	KIF14	0.77538	2.69245	0.100825	0.46431	0
ENSG00000118197	83479	DDX59	0.195982	0.162188	0.68715	0.879884	0
ENSG00000118200	23271	CAMSAP2	0.201271	0.200528	0.654295	0.866682	0
ENSG00000116857	252839	TMEM9	0.14329	0.0993712	0.752585	0.906416	0
ENSG00000174307	23612	PHLDA3	-1.07972	5.56149	0.0183598	0.149183	0
ENSG00000159176	1465	CSRP1	0.671542	2.29882	0.129473	0.524796	0
ENSG00000224536	107985246	CSRP1-AS1	-0.515631	0.629386	0.427581	0.778362	0
ENSG00000223396	NA	RPS10P7	0.0429552	0.00513238	0.942888	0.981028	0
ENSG00000134369	89796	NAV1	-0.427986	0.930525	0.334727	0.727807	0
ENSG00000198700	55705	IPO9	0.259537	0.333944	0.563346	0.834102	0
ENSG00000198892	149345	SHISA4	-0.201837	0.190117	0.662819	0.869598	0
ENSG00000223774	NA		0.818168	1.56595	0.210796	0.638426	0
ENSG00000163431	25802	LMOD1	0.197024	0.193782	0.659788	0.868173	0
ENSG00000134375	10440	TIMM17A	0.575509	1.5921	0.207026	0.633852	0
ENSG00000176393	6051	RNPEP	0.452566	1.00895	0.315155	0.71562	0
ENSG00000143862	127829	ARL8A	0.358756	0.616351	0.432406	0.780316	0
ENSG00000077152	29089	UBE2T	0.611771	1.56166	0.211422	0.638971	0
ENSG00000077157	4660	PPP1R12B	0.0920648	0.0360444	0.849424	0.944787	0
ENSG00000236439	NA		0.551607	0.792994	0.373196	0.751855	0
ENSG00000117139	10765	KDM5B	0.372012	0.692274	0.405392	0.767574	0
ENSG00000228288	100506696	PCAT6	-0.667635	1.59468	0.206658	0.633638	0
ENSG00000183155	5877	RABIF	1.17993	5.81188	0.0159182	0.134557	0
ENSG00000117153	59349	KLHL12	0.0443569	0.00919355	0.923613	0.97434	0
ENSG00000159346	51094	ADIPOR1	0.742745	2.70701	0.0999081	0.461642	0
ENSG00000159348	51706	CYB5R1	0.165935	0.129162	0.719302	0.892026	0
[truncated: 13,732 more rows]

## Sheet: Down in leo1
ensembl	entrez	symbol	Leo1_01_logFC	Leo1_01_LR	Leo1_01_PValue	Leo1_01_FDR	Leo1_01_DE
ENSG00000179403	64856	VWA1	-3.0922	28.7169	8.37706e-08	3.46788e-06	-1
ENSG00000227372	57212	TP73-AS1	-1.80046	12.3336	0.000444868	0.00699822	-1
ENSG00000235169	388588	SMIM1	-4.34119	29.9179	4.50728e-08	2.01432e-06	-1
ENSG00000228526	106614088	MIR34AHG	-2.47455	16.1709	5.78779e-05	0.00120593	-1
ENSG00000234546	102724571	LNCTAM34A	-5.52992	33.7758	6.18443e-09	3.29788e-07	-1
ENSG00000231789	101929074	PIK3CD-AS2	-3.94058	32.2479	1.35701e-08	6.65017e-07	-1
ENSG00000116661	26232	FBXO2	-1.68328	8.62474	0.00331627	0.0382707	-1
ENSG00000028137	7133	TNFRSF1B	-8.59549	65.0267	7.38908e-16	1.49023e-13	-1
ENSG00000162496	9249	DHRS3	-1.90419	15.3711	8.83297e-05	0.0017304	-1
ENSG00000171729	55092	TMEM51	-3.1179	30.2501	3.79771e-08	1.70691e-06	-1
ENSG00000142677	58985	IL22RA1	-3.93996	27.2685	1.77077e-07	6.87801e-06	-1
ENSG00000117643	57134	MAN1C1	-2.06222	14.4483	0.00014406	0.00264434	-1
ENSG00000162510	4146	MATN1	-2.56661	13.3318	0.000260947	0.00439502	-1
ENSG00000235790	NA	PEF1-AS1	-2.40449	10.4907	0.00119975	0.0161586	-1
ENSG00000160097	252995	FNDC5	-8.16796	57.4417	3.48152e-14	4.97889e-12	-1
ENSG00000121900	113452	TMEM54	-1.46953	8.94877	0.00277657	0.0328902	-1
ENSG00000171812	1296	COL8A2	-2.18747	17.3729	3.07169e-05	0.000686374	-1
ENSG00000163879	7802	DNALI1	-7.14771	73.1267	1.21586e-17	3.68318e-15	-1
ENSG00000169218	284654	RSPO1	-6.50645	48.7418	2.91977e-12	2.87068e-10	-1
ENSG00000158315	54933	RHBDL2	-3.55148	11.2059	0.000815391	0.0117152	-1
ENSG00000049089	1298	COL9A2	-6.32826	29.1892	6.56446e-08	2.79852e-06	-1
ENSG00000204060	100132074	FOXO6	-1.59494	8.58089	0.00339709	0.0389785	-1
ENSG00000066056	7075	TIE1	-2.10836	10.4013	0.00125926	0.0167593	-1
ENSG00000162415	57643	ZSWIM5	-2.04143	13.5812	0.000228457	0.00393269	-1
ENSG00000171357	541468	LURAP1	-2.16888	15.1132	0.000101254	0.00194246	-1
ENSG00000132122	54558	SPATA6	-1.74409	11.5417	0.000680506	0.0100047	-1
ENSG00000162407	8613	PLPP3	-1.41215	9.53123	0.00202005	0.0251006	-1
ENSG00000185483	4919	ROR1	-2.33446	19.4693	1.0223e-05	0.000258966	-1
ENSG00000158966	57685	CACHD1	-4.17292	52.5292	4.23906e-13	4.83222e-11	-1
ENSG00000162433	205	AK4	-1.60858	11.1206	0.000853756	0.0121908	-1
ENSG00000152760	200132	DYNLT5	-6.08226	26.1695	3.1272e-07	1.15208e-05	-1
ENSG00000122420	5737	PTGFR	-2.05852	18.0976	2.09869e-05	0.00048766	-1
ENSG00000055732	55283	MCOLN3	-2.10495	14.3916	0.000148461	0.00271563	-1
ENSG00000171502	255631	COL24A1	-2.00202	8.24581	0.00408461	0.0455387	-1
ENSG00000172031	253152	EPHX4	-2.36121	15.4239	8.5893e-05	0.00169109	-1
ENSG00000137942	54874	FNBP1L	-1.74698	13.272	0.000269395	0.00450836	-1
ENSG00000162639	113802	HENMT1	-7.19217	41.3524	1.27115e-10	9.25763e-09	-1
ENSG00000258673	104355139	LINC01397	-2.60108	22.0126	2.70868e-06	8.00134e-05	-1
ENSG00000186150	164153	UBL4B	-1.84653	12.6043	0.000384858	0.00617146	-1
ENSG00000116774	56944	OLFML3	-1.46252	10.3457	0.00129779	0.0171271	-1
ENSG00000134198	10100	TSPAN2	-2.2444	16.5337	4.77922e-05	0.0010146	-1
ENSG00000203865	84852	ATP1A1-AS1	-2.36609	16.5117	4.83496e-05	0.00102367	-1
ENSG00000134247	5738	PTGFRN	-3.36582	38.4633	5.57932e-10	3.61187e-08	-1
ENSG00000223804	NA		-2.01459	10.4681	0.00121453	0.0163158	-1
ENSG00000198483	148741	ANKRD35	-1.69265	10.0225	0.00154635	0.0199391	-1
ENSG00000280649	NA		-2.51644	12.4854	0.000410148	0.0065238	-1
ENSG00000215861	NA		-2.38337	14.4392	0.000144756	0.00265402	-1
ENSG00000266472	54460	MRPS21	-2.03474	16.6351	4.5304e-05	0.000969629	-1
ENSG00000163131	1520	CTSS	-1.71947	10.9593	0.000931369	0.0131167	-1
ENSG00000162755	126823	KLHDC9	-2.88664	13.3895	0.000253032	0.00428928	-1
ENSG00000143196	1805	DPT	-1.53297	9.68029	0.00186256	0.0234566	-1
ENSG00000116183	60676	PAPPA2	-2.75182	19.6355	9.37134e-06	0.000239319	-1
ENSG00000116711	5321	PLA2G4A	-3.77738	37.7682	7.96701e-10	5.05359e-08	-1
ENSG00000162687	343450	KCNT2	-2.82873	24.3984	7.83322e-07	2.69637e-05	-1
ENSG00000000971	3075	CFH	-1.79318	14.9035	0.000113153	0.00214437	-1
ENSG00000244414	3078	CFHR1	-2.05118	8.14468	0.00431877	0.0478104	-1
ENSG00000122176	2331	FMOD	-6.71923	63.3796	1.7047e-15	3.04735e-13	-1
ENSG00000123836	5208	PFKFB2	-9.11526	78.5612	7.75591e-19	2.77291e-16	-1
ENSG00000180667	55432	YOD1	-1.60823	9.40974	0.00215835	0.0264432	-1
ENSG00000174059	947	CD34	-1.75364	10.4936	0.00119789	0.0161586	-1
ENSG00000076356	5362	PLXNA2	-1.51912	10.3875	0.0012687	0.0168706	-1
ENSG00000117594	3290	HSD11B1	-4.95151	25.6232	4.15022e-07	1.50085e-05	-1
ENSG00000143469	255928	SYT14	-2.37258	21.2636	4.00251e-06	0.000113385	-1
ENSG00000143494	79805	VASH2	-4.66228	27.7211	1.40125e-07	5.56645e-06	-1
ENSG00000116141	4139	MARK1	-6.48587	71.9329	2.22646e-17	6.14465e-15	-1
ENSG00000186205	64757	MTARC1	-3.05088	14.9712	0.000109162	0.00208149	-1
ENSG00000185842	127602	DNAH14	-1.76996	9.55394	0.00199521	0.0248509	-1
ENSG00000162913	574407	OBSCN-AS1	-2.17202	10.2332	0.00137938	0.0180826	-1
ENSG00000154358	84033	OBSCN	-1.79809	11.894	0.000563147	0.00855103	-1
ENSG00000133019	1131	CHRM3	-2.54437	17.4814	2.90134e-05	0.000656705	-1
ENSG00000162981	151354	LRATD1	-7.02997	39.0356	4.16146e-10	2.76219e-08	-1
ENSG00000170745	3790	KCNS3	-6.46799	92.0777	8.33406e-22	4.68225e-19	-1
ENSG00000143867	130497	OSR1	-2.51915	22.5562	2.04083e-06	6.29497e-05	-1
ENSG00000084710	22979	EFR3B	-2.28567	14.0131	0.000181543	0.00320295	-1
ENSG00000158089	79623	GALNT14	-2.45453	11.9222	0.000554698	0.00844719	-1
ENSG00000013016	30845	EHD3	-1.40024	9.52485	0.00202708	0.0251682	-1
ENSG00000049323	4052	LTBP1	-1.6973	13.5451	0.000232904	0.00398674	-1
ENSG00000143891	130589	GALM	-10.5726	112.121	3.36166e-26	3.77731e-23	-1
ENSG00000183023	6546	SLC8A1	-1.5634	11.4758	0.000705075	0.0103466	-1
ENSG00000170577	10736	SIX2	-4.19248	52.2219	4.95705e-13	5.53045e-11	-1
ENSG00000286519	NA		-6.81439	35.6633	2.3454e-09	1.33679e-07	-1
ENSG00000243244	11037	STON1	-1.47902	8.84417	0.00294027	0.034569	-1
ENSG00000115380	2202	EFEMP1	-3.34416	46.8089	7.82578e-12	6.91614e-10	-1
ENSG00000042493	822	CAPG	-3.3334	39.4184	3.42053e-10	2.30937e-08	-1
ENSG00000172086	51315	KRCC1	-1.59854	10.932	0.000945181	0.0132874	-1
ENSG00000144115	55258	THNSL2	-5.70157	80.6826	2.65048e-19	1.04237e-16	-1
ENSG00000233757	344065	LOC344065	-5.02852	33.4105	7.46194e-09	3.87405e-07	-1
ENSG00000155066	150696	PROM2	-2.66049	11.9689	0.000540958	0.00828609	-1
ENSG00000225398	NA	PGM5P4	-2.2865	13.199	0.000280104	0.0046593	-1
ENSG00000163083	3625	INHBB	-3.97406	51.0661	8.93096e-13	9.49277e-11	-1
ENSG00000186684	339761	CYP27C1	-3.24079	34.5194	4.22026e-09	2.33764e-07	-1
ENSG00000214100	389033	PLAC9P1	-3.18841	24.1267	9.02005e-07	3.02547e-05	-1
ENSG00000136002	50649	ARHGEF4	-2.56588	22.0037	2.72123e-06	8.01643e-05	-1
ENSG00000150540	3176	HNMT	-6.6745	62.8984	2.17653e-15	3.84707e-13	-1
ENSG00000168702	53353	LRP1B	-2.32368	17.0236	3.6918e-05	0.000809981	-1
ENSG00000287900	NA		-4.62327	21.6726	3.23384e-06	9.38589e-05	-1
ENSG00000162989	3760	KCNJ3	-1.71147	12.0728	0.00051162	0.00792155	-1
ENSG00000241399	9936	CD302	-1.88263	16.011	6.29771e-05	0.00129842	-1
ENSG00000153253	6328	SCN3A	-4.61401	41.2481	1.34084e-10	9.72016e-09	-1
ENSG00000136531	6326	SCN2A	-4.05956	35.1352	3.07584e-09	1.72808e-07	-1
ENSG00000178662	80034	CSRNP3	-2.57237	22.3138	2.31536e-06	7.00441e-05	-1
ENSG00000115339	2591	GALNT3	-3.08692	26.0701	3.29235e-07	1.20727e-05	-1
ENSG00000144285	6323	SCN1A	-4.30733	10.4047	0.00125697	0.0167593	-1
ENSG00000136546	6332	SCN7A	-1.94047	9.68466	0.00185813	0.0234404	-1
ENSG00000071909	140469	MYO3B	-3.3814	25.9902	3.43162e-07	1.2525e-05	-1
ENSG00000224189	401022	HAGLR	-6.08939	58.4403	2.09555e-14	3.10991e-12	-1
ENSG00000162998	2487	FRZB	-2.80148	25.4606	4.51505e-07	1.61791e-05	-1
ENSG00000138449	30061	SLC40A1	-6.94678	77.127	1.60314e-18	5.60421e-16	-1
ENSG00000187699	84281	C2orf88	-2.08833	12.436	0.000421137	0.0066716	-1
ENSG00000162944	130132	RFTN2	-2.46943	18.9656	1.33099e-05	0.000325626	-1
ENSG00000115896	5334	PLCL1	-1.67127	8.42727	0.00369635	0.0417724	-1
ENSG00000114948	8745	ADAM23	-4.51685	29.8616	4.6401e-08	2.06196e-06	-1
ENSG00000115457	3485	IGFBP2	-2.01842	9.39763	0.00217266	0.0265771	-1
ENSG00000079308	7145	TNS1	-3.77149	55.1882	1.09522e-13	1.3566e-11	-1
ENSG00000135929	1593	CYP27A1	-1.52721	9.21713	0.00239762	0.0289684	-1
ENSG00000153820	80309	SPHKAP	-1.53022	10.4961	0.00119627	0.0161586	-1
ENSG00000168918	3635	INPP5D	-6.20776	27.5708	1.51449e-07	5.98605e-06	-1
ENSG00000115648	79083	MLPH	-2.3034	18.4518	1.74259e-05	0.000414716	-1
ENSG00000132329	10267	RAMP1	-5.92781	62.6936	2.41501e-15	4.20217e-13	-1
ENSG00000144488	339768	ESPNL	-3.28836	24.2026	8.67138e-07	2.93354e-05	-1
ENSG00000163704	285368	PRRT3	-1.78419	11.1072	0.000859952	0.0122535	-1
ENSG00000132170	5468	PPARG	-3.98081	43.6363	3.95437e-11	3.12594e-09	-1
ENSG00000144712	23066	CAND2	-7.81256	51.6106	6.76742e-13	7.44463e-11	-1
ENSG00000163520	2199	FBLN2	-1.7584	14.8903	0.000113946	0.00215443	-1
ENSG00000151789	79750	ZNF385D	-6.98468	59.5298	1.20457e-14	1.91406e-12	-1
ENSG00000173705	26032	SUSD5	-2.73643	22.5371	2.06126e-06	6.33313e-05	-1
ENSG00000168016	9881	TRANK1	-2.10452	17.8569	2.38158e-05	0.00054773	-1
ENSG00000261786	NA		-2.22175	14.0831	0.000174909	0.00310903	-1
ENSG00000169964	131616	TMEM42	-2.25243	17.988	2.22305e-05	0.000514276	-1
ENSG00000160808	4634	MYL3	-3.08531	23.3964	1.31824e-06	4.22348e-05	-1
ENSG00000001617	6405	SEMA3F	-2.79629	23.7231	1.11237e-06	3.62282e-05	-1
ENSG00000273356	NA	LINC02019	-1.9083	9.06866	0.00260028	0.0310356	-1
ENSG00000144730	54756	IL17RD	-2.68795	24.7463	6.53938e-07	2.28095e-05	-1
ENSG00000168306	8309	ACOX2	-2.83373	18.9312	1.35515e-05	0.000329488	-1
ENSG00000242516	401074	LINC00960	-6.74374	34.8928	3.4837e-09	1.95025e-07	-1
ENSG00000185008	6092	ROBO2	-1.5319	11.0994	0.000863577	0.0122718	-1
ENSG00000172020	2596	GAP43	-7.22654	95.3656	1.58282e-22	1.03747e-19	-1
ENSG00000185565	4045	LSAMP	-4.24546	30.8675	2.76254e-08	1.28573e-06	-1
ENSG00000180353	3059	HCLS1	-4.39883	46.7498	8.06521e-12	7.0096e-10	-1
ENSG00000173175	111	ADCY5	-3.46486	16.2658	5.50496e-05	0.00115005	-1
ENSG00000144908	10840	ALDH1L1	-3.12623	8.17982	0.0042359	0.0470918	-1
ENSG00000249846	105374104	LINC02021	-1.97175	8.20158	0.0041854	0.0465633	-1
ENSG00000129048	51554	ACKR4	-2.53427	27.744	1.38474e-07	5.51479e-06	-1
ENSG00000155893	92370	PXYLP1	-1.92498	14.2673	0.000158594	0.00286764	-1
ENSG00000163710	26577	PCOLCE2	-7.82281	51.1455	8.57682e-13	9.24123e-11	-1
ENSG00000181804	285195	SLC9A9	-2.89545	28.9101	7.58183e-08	3.16366e-06	-1
ENSG00000174963	84107	ZIC4	-4.20262	25.6015	4.19707e-07	1.51431e-05	-1
ENSG00000152977	7545	ZIC1	-1.80568	11.2057	0.000815469	0.0117152	-1
ENSG00000169860	5028	P2RY1	-7.80613	50.8835	9.80136e-13	1.0348e-10	-1
ENSG00000168779	6474	SHOX2	-3.77779	50.0685	1.48472e-12	1.50685e-10	-1
ENSG00000118849	5918	RARRES1	-2.8653	26.9958	2.03898e-07	7.82321e-06	-1
ENSG00000013293	57709	SLC7A14	-5.37521	67.1407	2.52803e-16	5.60118e-14	-1
ENSG00000163584	200916	RPL22L1	-1.51966	10.755	0.00103999	0.0143761	-1
ENSG00000172667	64393	ZMAT3	-1.49136	10.4911	0.00119948	0.0161586	-1
ENSG00000114757	51555	PEX5L	-3.69415	18.9589	1.33561e-05	0.000325991	-1
ENSG00000136514	64108	RTP4	-2.17341	13.0834	0.000297931	0.00491789	-1
ENSG00000229334	NA	TMEM44-AS2	-2.03912	11.9937	0.000533811	0.00820056	-1
ENSG00000189058	347	APOD	-2.38141	24.747	6.5369e-07	2.28095e-05	-1
ENSG00000163975	4241	MELTF	-2.00925	14.0786	0.000175326	0.00310942	-1
ENSG00000159674	10417	SPON2	-1.72232	10.2893	0.00133805	0.0176141	-1
ENSG00000068078	2261	FGFR3	-3.21155	16.6583	4.47549e-05	0.000961803	-1
ENSG00000170801	94031	HTRA3	-6.22034	44.2339	2.91398e-11	2.36287e-09	-1
ENSG00000263327	202020	TAPT1-AS1	-2.00913	9.73986	0.00180314	0.0228384	-1
ENSG00000169744	9079	LDB2	-1.36406	8.31921	0.00392281	0.0439528	-1
ENSG00000163694	54502	RBM47	-5.2028	29.3614	6.0061e-08	2.57444e-06	-1
ENSG00000179299	79730	NSUN7	-5.7566	22.5866	2.00885e-06	6.20849e-05	-1
ENSG00000145244	10699	CORIN	-2.23909	22.0804	2.6146e-06	7.78982e-05	-1
ENSG00000163071	132671	SPATA18	-5.63962	75.4472	3.75311e-18	1.23e-15	-1
ENSG00000157404	3815	KIT	-3.43037	27.4172	1.63967e-07	6.44841e-06	-1
ENSG00000196503	132946	ARL9	-3.13563	14.4347	0.000145103	0.0026573	-1
ENSG00000156140	9508	ADAMTS3	-2.22179	10.3134	0.00132064	0.0173995	-1
ENSG00000124875	6372	CXCL6	-6.27051	28.3136	1.03167e-07	4.17202e-06	-1
ENSG00000163739	2919	CXCL1	-5.9283	42.7514	6.21568e-11	4.79308e-09	-1
ENSG00000138744	27163	NAAA	-1.70039	10.846	0.000990089	0.0138692	-1
ENSG00000152784	56978	PRDM8	-1.55949	10.0604	0.00151491	0.0195979	-1
ENSG00000152785	651	BMP3	-4.24559	17.5584	2.78615e-05	0.000632452	-1
ENSG00000138669	5593	PRKG2	-7.12401	39.9513	2.60368e-10	1.80158e-08	-1
ENSG00000249242	441027	TMEM150C	-2.19262	15.8623	6.81207e-05	0.00138451	-1
ENSG00000138646	51191	HERC5	-2.4319	18.6758	1.54933e-05	0.000370966	-1
ENSG00000246090	100507053	LOC100507053	-1.67667	9.4966	0.00205853	0.0254782	-1
ENSG00000138821	64116	SLC39A8	-1.56096	9.66013	0.00188311	0.0236041	-1
ENSG00000155011	27123	DKK2	-1.94101	8.36097	0.00383365	0.0429844	-1
ENSG00000205403	3426	CFI	-4.49281	41.233	1.35119e-10	9.75027e-09	-1
ENSG00000145362	287	ANK2	-2.14437	15.8018	7.03351e-05	0.00141851	-1
ENSG00000173376	79625	NDNF	-8.37673	125.036	4.99717e-29	1.12301e-25	-1
ENSG00000138741	7222	TRPC3	-3.61727	29.8202	4.74016e-08	2.10049e-06	-1
ENSG00000164056	10252	SPRY1	-2.37349	21.9872	2.74478e-06	8.07069e-05	-1
ENSG00000085871	4258	MGST2	-1.44818	8.17709	0.00424228	0.0470962	-1
ENSG00000151617	1909	EDNRA	-1.53849	9.2885	0.00230597	0.0280551	-1
ENSG00000185149	4887	NPY2R	-5.57214	20.608	5.63607e-06	0.000154193	-1
ENSG00000256043	1519	CTSO	-1.4341	9.37885	0.00219504	0.0268091	-1
ENSG00000145431	56034	PDGFC	-1.61659	12.033	0.000522666	0.00805295	-1
ENSG00000164125	51313	GASK1B	-5.17002	67.007	2.70546e-16	5.91106e-14	-1
ENSG00000168843	56884	FSTL5	-2.63799	24.2825	8.31908e-07	2.82651e-05	-1
ENSG00000109472	1363	CPE	-7.23559	113.416	1.74894e-26	2.29271e-23	-1
ENSG00000196104	50859	SPOCK3	-3.63299	21.8721	2.91443e-06	8.50591e-05	-1
ENSG00000164107	9464	HAND2	-3.25169	23.2948	1.38976e-06	4.43454e-05	-1
ENSG00000237125	79804	HAND2-AS1	-5.65535	52.5022	4.29776e-13	4.86389e-11	-1
ENSG00000218336	55714	TENM3	-1.79481	13.808	0.00020247	0.0035272	-1
ENSG00000151729	291	SLC25A4	-7.81028	52.9771	3.37468e-13	3.93238e-11	-1
ENSG00000154153	54463	RETREG1	-3.09766	18.809	1.44485e-05	0.000348603	-1
ENSG00000145526	1016	CDH18	-4.0007	30.658	3.0776e-08	1.40738e-06	-1
ENSG00000132357	84674	CARD6	-4.34871	48.44	3.4055e-12	3.26606e-10	-1
ENSG00000182836	345557	PLCXD3	-3.81969	40.5729	1.8942e-10	1.34831e-08	-1
ENSG00000250722	6414	SELENOP	-1.71735	11.3169	0.000768058	0.0111664	-1
ENSG00000016082	3670	ISL1	-3.39328	17.4369	2.96998e-05	0.000668395	-1
ENSG00000134363	10468	FST	-2.29054	19.8365	8.43569e-06	0.00021898	-1
ENSG00000164181	79993	ELOVL7	-2.07951	9.41721	0.00214958	0.0263768	-1
ENSG00000113231	8622	PDE8B	-2.04123	14.7702	0.000121438	0.00227421	-1
ENSG00000132840	23743	BHMT2	-3.90742	37.1322	1.10383e-09	6.80956e-08	-1
ENSG00000113319	5924	RASGRF2	-4.82804	59.1687	1.44715e-14	2.2765e-12	-1
ENSG00000081189	4208	MEF2C	-2.73356	23.7788	1.08067e-06	3.54906e-05	-1
ENSG00000171444	4163	MCC	-3.08563	33.9625	5.61839e-09	3.04769e-07	-1
ENSG00000129596	1036	CDO1	-9.36221	81.7774	1.5231e-19	6.14355e-17	-1
ENSG00000064692	9627	SNCAIP	-4.50976	62.1312	3.21322e-15	5.49425e-13	-1
ENSG00000168916	57507	ZNF608	-2.14047	13.2091	0.000278594	0.00464747	-1
ENSG00000131435	8572	PDLIM4	-4.73914	57.3128	3.71737e-14	5.22124e-12	-1
ENSG00000081059	6932	TCF7	-3.3096	32.6798	1.08662e-08	5.44385e-07	-1
ENSG00000146021	26249	KLHL3	-4.21608	28.2567	1.06248e-07	4.27466e-06	-1
ENSG00000250159	NA	PKD2L2-DT	-6.64109	33.3318	7.76996e-09	4.0207e-07	-1
ENSG00000113209	26167	PCDHB5	-2.7422	20.1659	7.10087e-06	0.000188371	-1
ENSG00000113212	56129	PCDHB7	-1.76138	11.1149	0.000856391	0.0122139	-1
ENSG00000253305	56100	PCDHGB6	-1.89376	13.024	0.000307528	0.00506038	-1
ENSG00000253846	56106	PCDHGA10	-2.7687	24.9353	5.92881e-07	2.08649e-05	-1
ENSG00000253159	26025	PCDHGA12	-6.45683	102.682	3.93535e-24	3.43928e-21	-1
ENSG00000183876	340075	ARSI	-2.43075	21.1034	4.35159e-06	0.000121806	-1
ENSG00000155511	2890	GRIA1	-1.93305	16.2354	5.59377e-05	0.00116705	-1
ENSG00000170624	6444	SGCD	-6.63404	126.401	2.51178e-29	6.58546e-26	-1
ENSG00000184347	6586	SLIT3	-5.05273	87.9404	6.74574e-21	3.31616e-18	-1
ENSG00000120149	4488	MSX2	-3.3397	32.985	9.28749e-09	4.71295e-07	-1
ENSG00000131459	9945	GFPT2	-4.71367	55.4721	9.4795e-14	1.18351e-11	-1
ENSG00000286785	285768	LINC01622	-3.69449	21.1708	4.20118e-06	0.000118016	-1
ENSG00000164379	94234	FOXQ1	-1.94875	12.8539	0.000336773	0.00548424	-1
ENSG00000230438	NA	SERPINB9P1	-2.68499	15.6557	7.59838e-05	0.00150922	-1
ENSG00000219607	648791	PPP1R3G	-1.89366	10.44	0.00123317	0.0165238	-1
ENSG00000261189	NA	DSP-AS1	-2.71996	16.9149	3.90934e-05	0.000852953	-1
ENSG00000096696	1832	DSP	-1.86077	16.063	6.12697e-05	0.00126987	-1
ENSG00000111846	2651	GCNT2	-2.8962	9.16645	0.00246492	0.0296852	-1
ENSG00000112137	221692	PHACTR1	-1.57681	8.43546	0.00367974	0.0416146	-1
ENSG00000112149	9308	CD83	-1.66227	10.4471	0.00122845	0.0164887	-1
ENSG00000206337	10866	HCP5	-2.29256	13.3497	0.000258464	0.00436255	-1
ENSG00000243649	629	CFB	-6.57159	32.2056	1.38691e-08	6.77563e-07	-1
ENSG00000146197	222663	SCUBE3	-2.55212	27.8213	1.33051e-07	5.31224e-06	-1
ENSG00000010030	51513	ETV7	-2.39663	16.7677	4.2247e-05	0.000911642	-1
ENSG00000112139	266727	MDGA1	-1.60922	9.99471	0.0015699	0.0201437	-1
ENSG00000112619	5961	PRPH2	-8.49427	63.768	1.3997e-15	2.62126e-13	-1
ENSG00000112655	5754	PTK7	-2.40006	26.1386	3.17763e-07	1.16793e-05	-1
ENSG00000172426	221421	RSPH9	-3.24774	19.975	7.84625e-06	0.000206749	-1
ENSG00000172348	10231	RCAN2	-3.10198	37.3536	9.85375e-10	6.12685e-08	-1
ENSG00000146072	27242	TNFRSF21	-1.63098	10.5685	0.00115033	0.0156674	-1
ENSG00000244694	442213	PTCHD4	-7.02351	71.2919	3.08096e-17	8.21467e-15	-1
ENSG00000124749	81578	COL21A1	-6.98653	80.0557	3.64011e-19	1.39665e-16	-1
ENSG00000112182	60468	BACH2	-2.2471	15.5431	8.06438e-05	0.00159373	-1
ENSG00000146374	84870	RSPO3	-5.53666	54.2564	1.75964e-13	2.11304e-11	-1
ENSG00000146411	154091	SLC2A12	-1.53172	9.03434	0.00264955	0.0315042	-1
ENSG00000225177	NA	NHSL1-AS1	-2.38502	14.3208	0.000154154	0.00280346	-1
ENSG00000111962	10090	UST	-2.77884	28.8895	7.66286e-08	3.18901e-06	-1
ENSG00000120262	80129	CCDC170	-3.27873	27.5339	1.54363e-07	6.08593e-06	-1
ENSG00000091831	2099	ESR1	-2.65795	16.5953	4.62663e-05	0.000987537	-1
ENSG00000225968	392617	ELFN1	-4.56944	61.5386	4.34156e-15	7.26565e-13	-1
ENSG00000005108	221981	THSD7A	-5.13728	42.5258	6.97572e-11	5.32694e-09	-1
ENSG00000146530	221806	VWDE	-3.42006	24.6157	6.99779e-07	2.43007e-05	-1
ENSG00000136267	1607	DGKB	-1.72808	9.27936	0.00231751	0.0281736	-1
ENSG00000271133	101927811	ITGB8-AS1	-2.66519	15.278	9.27932e-05	0.00180602	-1
ENSG00000255690	9865	TRIL	-7.66382	48.4165	3.44648e-12	3.26606e-10	-1
ENSG00000078053	273	AMPH	-2.00247	8.65042	0.00326985	0.0377943	-1
ENSG00000235314	NA	LINC00957	-4.56403	30.6874	3.03125e-08	1.39074e-06	-1
ENSG00000106624	165	AEBP1	-1.62526	12.8609	0.000335516	0.00546943	-1
ENSG00000106633	2645	GCK	-3.88532	18.2841	1.90289e-05	0.000447783	-1
ENSG00000188372	7784	ZP3	-4.03747	28.154	1.12034e-07	4.49594e-06	-1
ENSG00000005471	5244	ABCB4	-5.36408	70.1396	5.52513e-17	1.4486e-14	-1
ENSG00000008277	53616	ADAM22	-4.01348	47.989	4.28623e-12	3.98974e-10	-1
ENSG00000164647	26872	STEAP1	-5.4236	39.9192	2.64688e-10	1.81826e-08	-1
ENSG00000157214	261729	STEAP2	-2.93095	26.9714	2.06487e-07	7.90328e-06	-1
ENSG00000004799	5166	PDK4	-3.15474	28.586	8.96269e-08	3.67167e-06	-1
ENSG00000166448	222865	TMEM130	-3.47406	29.0732	6.96954e-08	2.94726e-06	-1
ENSG00000197093	79690	GAL3ST4	-3.74637	40.8909	1.6097e-10	1.15101e-08	-1
ENSG00000166924	222950	NYAP1	-2.76888	17.7511	2.51776e-05	0.00057568	-1
ENSG00000189056	5649	RELN	-4.11683	46.9866	7.14746e-12	6.42495e-10	-1
ENSG00000105989	7472	WNT2	-4.42116	19.7162	8.98361e-06	0.000231295	-1
ENSG00000077063	83992	CTTNBP2	-6.56147	50.3324	1.2979e-12	1.34324e-10	-1
ENSG00000081803	93664	CADPS2	-5.04616	67.3424	2.2822e-16	5.12874e-14	-1
ENSG00000128602	6608	SMO	-1.81112	12.281	0.000457601	0.00719134	-1
ENSG00000106484	4232	MEST	-2.12056	19.9267	8.04671e-06	0.000211677	-1
ENSG00000270953	NA		-2.98245	11.5939	0.000661672	0.00975535	-1
ENSG00000286214	NA	COPG2IT1	-3.61024	24.3255	8.13531e-07	2.77005e-05	-1
ENSG00000105894	5764	PTN	-1.4293	9.69949	0.0018432	0.0232707	-1
ENSG00000157680	9162	DGKI	-1.58436	8.0721	0.0044952	0.0496238	-1
ENSG00000146858	92092	ZC3HAV1L	-2.91467	23.3653	1.33972e-06	4.28356e-05	-1
ENSG00000155093	5799	PTPRN2	-2.15916	9.07659	0.00258903	0.0309483	-1
ENSG00000185960	6473	SHOX	-1.63778	11.5939	0.000661684	0.00975535	-1
ENSG00000006757	8228	PNPLA4	-9.04812	76.2864	2.45366e-18	8.21244e-16	-1
ENSG00000047648	395	ARHGAP6	-2.29796	12.4958	0.000407861	0.00649911	-1
ENSG00000198759	25975	EGFL6	-5.40272	46.7653	8.0019e-12	6.99322e-10	-1
ENSG00000046653	2824	GPM6B	-7.59332	47.1497	6.57656e-12	5.98011e-10	-1
ENSG00000169306	11141	IL1RAPL1	-3.35957	22.6267	1.96728e-06	6.09198e-05	-1
ENSG00000147144	90060	CCDC120	-5.4007	31.7577	1.74653e-08	8.38502e-07	-1
ENSG00000196368	55190	NUDT11	-3.58899	37.3426	9.90966e-10	6.13736e-08	-1
ENSG00000227486	NA		-3.6244	20.0708	7.46289e-06	0.000197309	-1
ENSG00000089472	9843	HEPH	-3.31111	30.6867	3.03238e-08	1.39074e-06	-1
ENSG00000131080	60401	EDA2R	-4.84262	67.7112	1.89281e-16	4.31534e-14	-1
ENSG00000169083	367	AR	-3.45585	46.2781	1.02604e-11	8.82004e-10	-1
ENSG00000204131	340527	NHSL2	-6.25929	95.7805	1.28354e-22	8.77883e-20	-1
ENSG00000126950	59353	TMEM35A	-7.14682	40.3779	2.0929e-10	1.47639e-08	-1
ENSG00000133169	55859	BEX1	-7.95263	57.2	3.93675e-14	5.43237e-12	-1
ENSG00000101938	91851	CHRDL1	-1.68061	8.50463	0.00354243	0.0403519	-1
ENSG00000123496	3598	IL13RA2	-5.80687	23.2364	1.43261e-06	4.56203e-05	-1
ENSG00000125354	23157	SEPTIN6	-2.16729	20.2593	6.7624e-06	0.000180917	-1
ENSG00000134602	51765	STK26	-2.78206	24.0741	9.2699e-07	3.10265e-05	-1
ENSG00000129675	9459	ARHGEF6	-1.71791	11.5967	0.000660672	0.00975535	-1
ENSG00000046774	51438	MAGEC2	-2.21689	17.7644	2.5002e-05	0.000572499	-1
ENSG00000102287	2564	GABRE	-1.63451	10.4913	0.00119941	0.0161586	-1
ENSG00000198681	4100	MAGEA1	-3.07294	13.7951	0.000203862	0.0035471	-1
ENSG00000067840	57595	PDZD4	-2.38237	18.2521	1.93515e-05	0.000453679	-1
ENSG00000176595	9920	KBTBD11	-2.67196	17.2371	3.29923e-05	0.000730988	-1
ENSG00000183117	64478	CSMD1	-7.7377	111.665	4.23109e-26	4.43729e-23	-1
ENSG00000038945	4481	MSR1	-8.83997	168.346	1.69999e-38	2.67425e-34	-1
ENSG00000003989	6542	SLC7A2	-1.73729	10.831	0.000998126	0.0139555	-1
ENSG00000104213	5157	PDGFRL	-2.46231	23.7971	1.07045e-06	3.53025e-05	-1
ENSG00000168453	55806	HR	-1.89987	13.3352	0.000260469	0.00439169	-1
ENSG00000104689	8797	TNFRSF10A	-6.28241	28.6483	8.67922e-08	3.57416e-06	-1
ENSG00000168079	286133	SCARA5	-5.06244	56.8986	4.58882e-14	6.11752e-12	-1
ENSG00000120875	1846	DUSP4	-1.4918	9.56165	0.00198684	0.0247663	-1
ENSG00000157168	3084	NRG1	-1.7095	13.3968	0.000252055	0.00427732	-1
ENSG00000181195	5179	PENK	-2.6166	13.6374	0.000221728	0.00382876	-1
ENSG00000104435	11075	STMN2	-3.92677	22.6999	1.89376e-06	5.88749e-05	-1
ENSG00000147606	115111	SLC26A7	-3.84648	30.7077	2.99971e-08	1.38658e-06	-1
ENSG00000132561	4147	MATN2	-1.88366	14.618	0.000131651	0.00243935	-1
ENSG00000156486	3788	KCNS2	-3.16358	19.6102	9.49623e-06	0.000242115	-1
ENSG00000164920	116039	OSR2	-1.56073	11.5878	0.000663842	0.00976885	-1
ENSG00000164929	79870	BAALC	-3.55058	37.8867	7.49747e-10	4.79442e-08	-1
ENSG00000169946	23414	ZFPM2	-1.82608	12.2098	0.000475384	0.00740976	-1
ENSG00000251003	NA	ZFPM2-AS1	-2.32321	15.0709	0.000103547	0.00198265	-1
ENSG00000170961	3037	HAS2	-1.87104	13.585	0.000227995	0.00393267	-1
ENSG00000248690	124906789	HAS2-AS1	-2.39785	15.8301	6.92898e-05	0.00140283	-1
ENSG00000170873	9788	MTSS1	-1.9378	13.0451	0.000304071	0.00500873	-1
ENSG00000180155	66004	LYNX1	-6.67169	33.6417	6.62579e-09	3.49766e-07	-1
ENSG00000180921	286077	FAM83H	-3.59095	15.2762	9.28783e-05	0.00180602	-1
ENSG00000178814	26873	OPLAH	-9.88998	96.877	7.37697e-23	5.27487e-20	-1
ENSG00000147804	55630	SLC39A4	-2.80878	23.9399	9.93915e-07	3.30556e-05	-1
ENSG00000147852	7436	VLDLR	-3.14583	35.9581	2.01609e-09	1.16599e-07	-1
ENSG00000236496	392281	GPS2P1	-4.79917	23.7184	1.11511e-06	3.62282e-05	-1
ENSG00000178031	92949	ADAMTSL1	-6.90156	84.9111	3.1208e-20	1.3637e-17	-1
ENSG00000171889	554202	MIR31HG	-1.75137	11.8694	0.000570642	0.00863861	-1
ENSG00000120156	7010	TEK	-6.73008	64.7401	8.54593e-16	1.68045e-13	-1
ENSG00000165272	360	AQP3	-2.91275	19.0414	1.27914e-05	0.000315822	-1
ENSG00000230453	441459	ANKRD18B	-1.8511	10.556	0.0011581	0.0157324	-1
ENSG00000107159	768	CA9	-3.06646	23.7394	1.10302e-06	3.60739e-05	-1
ENSG00000137098	26206	SPAG8	-2.00516	8.79968	0.00301284	0.0353166	-1
ENSG00000185972	881	CCIN	-2.50528	16.8749	3.99256e-05	0.000867228	-1
ENSG00000165118	84267	C9orf64	-5.98149	64.0763	1.19692e-15	2.26852e-13	-1
ENSG00000231007	157956	CDC20P1	-2.33097	8.38743	0.00377826	0.0425758	-1
ENSG00000196730	1612	DAPK1	-4.00554	46.0207	1.17012e-11	1.00039e-09	-1
ENSG00000148082	53358	SHC3	-2.35075	18.3667	1.82212e-05	0.000431684	-1
ENSG00000169071	4920	ROR2	-6.94287	66.9669	2.76107e-16	5.94991e-14	-1
ENSG00000106809	4969	OGN	-1.91986	13.8824	0.000194617	0.00340926	-1
ENSG00000136842	7111	TMOD1	-1.82442	12.4481	0.000418428	0.00663538	-1
ENSG00000178919	2304	FOXE1	-6.95956	86.211	1.61727e-20	7.26896e-18	-1
ENSG00000136928	9568	GABBR2	-2.82427	18.0893	2.1078e-05	0.000489054	-1
ENSG00000165124	79987	SVEP1	-1.37604	9.08771	0.00257333	0.0308545	-1
ENSG00000228623	169834	ZNF883	-1.79496	9.71088	0.0018318	0.0231641	-1
ENSG00000182752	5069	PAPPA	-3.12562	39.9458	2.61115e-10	1.80158e-08	-1
ENSG00000234156	NA		-4.18497	38.1105	6.68498e-10	4.30989e-08	-1
ENSG00000185585	169611	OLFML2A	-2.33934	23.6829	1.13586e-06	3.66904e-05	-1
ENSG00000175287	254295	PHYHD1	-9.04882	104.946	1.25483e-24	1.16116e-21	-1
ENSG00000130707	445	ASS1	-1.71842	14.0123	0.000181618	0.00320295	-1
ENSG00000126878	83543	AIF1L	-3.55471	17.4047	3.02072e-05	0.000678842	-1
ENSG00000148288	26301	GBGT1	-2.07099	13.5364	0.000233985	0.00400089	-1
ENSG00000225756	138948	DBH-AS1	-2.11503	8.47912	0.00359245	0.0408625	-1
ENSG00000123453	1757	SARDH	-2.31745	15.5533	8.021e-05	0.00158715	-1
ENSG00000187796	64170	CARD9	-2.03266	12.6078	0.00038414	0.00616623	-1
ENSG00000182272	338707	B4GALNT4	-2.69865	21.8805	2.90169e-06	8.48446e-05	-1
ENSG00000184524	51286	CEND1	-1.97238	8.24218	0.0040928	0.0455976	-1
ENSG00000167244	3481	IGF2	-7.07623	39.3962	3.45974e-10	2.32586e-08	-1
ENSG00000254838	387751	GVINP1	-1.70299	9.26503	0.00233571	0.0283074	-1
ENSG00000251364	100506258	SYT9-AS1	-1.94885	8.5691	0.00341915	0.0392031	-1
ENSG00000166402	7275	TUB	-1.66695	11.2114	0.000812966	0.0117152	-1
ENSG00000175352	56675	NRIP3	-1.86072	14.2103	0.000163474	0.00294909	-1
ENSG00000175356	57758	SCUBE2	-4.64227	56.3264	6.13844e-14	7.91507e-12	-1
ENSG00000134569	4038	LRP4	-2.30405	21.1957	4.14684e-06	0.000116907	-1
ENSG00000134574	1643	DDB2	-1.63423	10.9863	0.000917863	0.0129497	-1
ENSG00000110042	23220	DTX4	-1.8789	12.2661	0.000461257	0.00722713	-1
ENSG00000229859	643834	PGA3	-4.98796	26.2289	3.03249e-07	1.11981e-05	-1
ENSG00000256713	5222	PGA5	-6.20643	74.2998	6.71097e-18	2.1545e-15	-1
ENSG00000167992	220001	VWCE	-1.89088	11.9367	0.000550381	0.00839771	-1
ENSG00000011347	9066	SYT7	-1.94976	14.3638	0.000150668	0.00274643	-1
ENSG00000162105	22941	SHANK2	-2.13239	13.9704	0.000185715	0.00327154	-1
ENSG00000085741	7481	WNT11	-2.50692	19.1028	1.23864e-05	0.000306852	-1
ENSG00000149256	26011	TENM4	-2.04407	14.6786	0.000127487	0.00238182	-1
ENSG00000086991	50507	NOX4	-2.78867	23.7152	1.11695e-06	3.62282e-05	-1
ENSG00000134627	143689	PIWIL4	-3.75606	19.7081	9.02176e-06	0.000231898	-1
ENSG00000196371	2526	FUT4	-4.52343	47.4914	5.52458e-12	5.08229e-10	-1
ENSG00000170962	80310	PDGFD	-2.93605	24.5677	7.17448e-07	2.48594e-05	-1
ENSG00000109846	1410	CRYAB	-2.82976	27.1513	1.88137e-07	7.25388e-06	-1
ENSG00000076706	4162	MCAM	-2.31495	10.6957	0.00107383	0.0147661	-1
ENSG00000149557	9638,105369550	FEZ1,STT3A-AS1	-5.10034	58.536	1.99606e-14	2.99048e-12	-1
ENSG00000134917	11095	ADAMTS8	-3.80241	39.1638	3.89698e-10	2.5976e-08	-1
ENSG00000196139	8644	AKR1C3	-2.42535	18.9575	1.33662e-05	0.000325991	-1
ENSG00000198879	57713	SFMBT2	-3.09907	24.2467	8.47514e-07	2.87333e-05	-1
ENSG00000134463	79746	ECHDC3	-6.81573	35.7478	2.24584e-09	1.28939e-07	-1
ENSG00000165626	222389	BEND7	-3.42018	30.8293	2.81745e-08	1.30741e-06	-1
ENSG00000148468	221061	FAM171A1	-1.9083	15.325	9.05092e-05	0.0017665	-1
ENSG00000077943	8516	ITGA8	-1.82319	11.7899	0.000595537	0.00898215	-1
ENSG00000204682	399726	MIR1915HG	-1.83526	9.93471	0.00162191	0.020717	-1
ENSG00000151025	57512	GPR158	-1.70865	9.23603	0.00237299	0.0287149	-1
ENSG00000165757	57608	JCAD	-1.58902	10.4232	0.00124445	0.0166467	-1
ENSG00000196793	8187	ZNF239	-6.62682	33.1471	8.54429e-09	4.37819e-07	-1
ENSG00000107562	6387	CXCL12	-2.07535	19.8505	8.37409e-06	0.000218101	-1
ENSG00000165633	196740	VSTM4	-1.87117	13.3249	0.000261906	0.00440431	-1
ENSG00000183346	219621	CABCOCO1	-8.92238	73.1241	1.2175e-17	3.68318e-15	-1
ENSG00000228065	NA	LINC01515	-2.04652	12.2713	0.000459972	0.00721418	-1
ENSG00000189129	219348	PLAC9	-2.15103	17.8695	2.36583e-05	0.000544903	-1
ENSG00000184719	55328	RNLS	-5.0051	38.1011	6.71708e-10	4.31291e-08	-1
ENSG00000026103	355	FAS	-2.041	18.3092	1.87797e-05	0.000444245	-1
ENSG00000138135	9023	CH25H	-3.25695	33.7574	6.24296e-09	3.31784e-07	-1
ENSG00000187553	340665	CYP26C1	-4.14836	16.4019	5.12351e-05	0.00107607	-1
ENSG00000138193	51196	PLCE1	-3.9114	42.2189	8.16092e-11	6.14256e-09	-1
ENSG00000138185	953	ENTPD1	-4.37763	52.541	4.21364e-13	4.83222e-11	-1
ENSG00000172987	60495	HPSE2	-3.0487	36.223	1.75978e-09	1.02911e-07	-1
ENSG00000148798	9118	INA	-8.28366	60.3771	7.83174e-15	1.27012e-12	-1
ENSG00000099204	3983	ABLIM1	-1.82109	13.355	0.000257728	0.0043548	-1
ENSG00000226864	100130887	ATE1-AS1	-2.80264	17.9676	2.24696e-05	0.000519044	-1
ENSG00000182022	51363	CHST15	-1.78496	11.9455	0.0005478	0.00836644	-1
ENSG00000132334	5791	PTPRE	-4.46668	19.9159	8.09258e-06	0.000211871	-1
ENSG00000108001	253738	EBF3	-4.43429	36.9908	1.1869e-09	7.2199e-08	-1
ENSG00000171798	85442	KNDC1	-2.34671	16.6925	4.39546e-05	0.000945895	-1
ENSG00000148803	282969	FUOM	-6.31328	72.2378	1.90768e-17	5.4563e-15	-1
ENSG00000130038	84766	CRACR2A	-3.33921	18.2637	1.9234e-05	0.000451597	-1
ENSG00000010610	920	CD4	-4.2167	48.6265	3.09662e-12	3.00697e-10	-1
ENSG00000226711	440078	FAM66C	-1.66826	9.06961	0.00259893	0.0310356	-1
ENSG00000197614	8076	MFAP5	-2.86834	31.0273	2.54422e-08	1.19116e-06	-1
ENSG00000166532	57494	RIMKLB	-1.56023	9.21732	0.00239736	0.0289684	-1
ENSG00000247157	338817	LINC01252	-2.73341	15.2071	9.63383e-05	0.00186179	-1
ENSG00000111261	54682	MANSC1	-5.47855	72.3659	1.78775e-17	5.20798e-15	-1
ENSG00000111341	4256	MGP	-2.61307	28.4107	9.81231e-08	3.98856e-06	-1
ENSG00000123096	8082	SSPN	-1.53646	10.7792	0.00102645	0.0142516	-1
ENSG00000110900	441631	TSPAN11	-3.99351	32.2597	1.3488e-08	6.64769e-07	-1
ENSG00000134285	51303	FKBP11	-2.23789	20.9338	4.75439e-06	0.000131907	-1
ENSG00000139567	94	ACVRL1	-1.61559	8.61209	0.00333939	0.038485	-1
ENSG00000037965	3224	HOXC8	-2.15869	10.743	0.00104676	0.0144571	-1
ENSG00000248265	440101	FLJ12825	-1.99167	10.8323	0.000997455	0.0139555	-1
ENSG00000250742	400043	LINC02381	-5.15274	57.1411	4.0564e-14	5.50096e-12	-1
ENSG00000241749	204010	RPSAP52	-1.9594	12.9317	0.00032307	0.00529397	-1
ENSG00000135678	1368	CPM	-1.70027	8.55152	0.00345234	0.0395261	-1
ENSG00000111058	79611	ACSS3	-1.6659	12.0227	0.000525574	0.00808192	-1
ENSG00000072041	55117	SLC6A15	-4.11733	37.4354	9.44938e-10	5.89873e-08	-1
ENSG00000198774	9182	RASSF9	-3.02872	20.6538	5.50286e-06	0.000151074	-1
ENSG00000136014	84101	USP44	-2.66746	14.2802	0.000157515	0.00285469	-1
ENSG00000171310	50515	CHST11	-4.08931	42.6364	6.59204e-11	5.0585e-09	-1
ENSG00000174600	1240	CMKLR1	-2.45653	21.523	3.49613e-06	0.000100728	-1
ENSG00000122986	84329	HVCN1	-8.0351	55.1488	1.11742e-13	1.37329e-11	-1
ENSG00000271579	NA		-2.69879	14.3366	0.000152867	0.00278327	-1
ENSG00000157782	9478	CABP1	-2.54463	11.3826	0.000741346	0.0108283	-1
ENSG00000139597	90634	N4BP2L1	-2.07236	14.5622	0.000135607	0.00250674	-1
ENSG00000133083	9201	DCLK1	-3.46834	36.0983	1.8761e-09	1.09204e-07	-1
ENSG00000136160	1910	EDNRB	-2.98594	25.584	4.23539e-07	1.52464e-05	-1
ENSG00000183098	10082	GPC6	-3.55764	19.3976	1.06141e-05	0.000267152	-1
ENSG00000165795	57447	NDRG2	-2.70208	12.892	0.000329991	0.00538494	-1
ENSG00000165821	6297	SALL2	-1.56006	8.72846	0.00313281	0.0365037	-1
ENSG00000155465	9056	SLC7A7	-2.33115	16.905	3.92981e-05	0.000855045	-1
ENSG00000092068	23428	SLC7A8	-6.22739	92.5361	6.61074e-22	3.85161e-19	-1
ENSG00000237356	NA		-2.23893	11.2091	0.00081398	0.0117152	-1
ENSG00000139971	145407	ARMH4	-2.19678	13.678	0.000216985	0.0037551	-1
ENSG00000165617	51339	DACT1	-1.40774	8.78118	0.00304354	0.0356235	-1
ENSG00000100626	57452	GALNT16	-3.10948	18.9144	1.36716e-05	0.000331895	-1
ENSG00000119630	5228	PGF	-2.57203	19.4598	1.02742e-05	0.000259844	-1
ENSG00000170345	2353	FOS	-2.05245	19.9154	8.09451e-06	0.000211871	-1
ENSG00000185070	23768	FLRT2	-1.53216	10.8183	0.00100501	0.0139919	-1
ENSG00000165521	161436	EML5	-3.97141	48.2549	3.74255e-12	3.5254e-10	-1
ENSG00000119714	8111	GPR68	-2.7536	17.0625	3.61694e-05	0.000794665	-1
ENSG00000182218	84439	HHIPL1	-3.11882	23.2064	1.45509e-06	4.62425e-05	-1
ENSG00000196405	51466	EVL	-1.84254	14.5336	0.000137684	0.00253917	-1
ENSG00000183092	57596	BEGAIN	-4.1384	31.7557	1.74832e-08	8.38502e-07	-1
ENSG00000274253	283683	LOC283683	-2.69826	10.4209	0.00124599	0.0166531	-1
ENSG00000062524	4058	LTK	-5.05895	60.5003	7.35655e-15	1.20548e-12	-1
ENSG00000138606	90525	SHF	-4.59993	53.5875	2.47323e-13	2.92529e-11	-1
ENSG00000166477	123169	LEO1	-4.30028	59.0379	1.54663e-14	2.40892e-12	-1
ENSG00000128849	84952	CGNL1	-1.93296	8.97612	0.00273531	0.0324749	-1
ENSG00000137878	145781	GCOM1	-1.66142	8.60833	0.00334628	0.0385362	-1
ENSG00000074410	771	CA12	-2.51508	20.7349	5.27452e-06	0.000145568	-1
ENSG00000166831	348093	RBPMS2	-4.83136	30.3407	3.62435e-08	1.63366e-06	-1
ENSG00000103710	51285	RASL12	-1.79695	10.0911	0.0014899	0.019338	-1
ENSG00000138615	8483	CILP	-2.40613	12.8193	0.000343054	0.00556922	-1
ENSG00000103742	57722	IGDCC4	-5.40085	48.7493	2.90867e-12	2.87068e-10	-1
ENSG00000103647	10391	CORO2B	-1.804	12.0363	0.000521755	0.00804679	-1
ENSG00000129009	3671	ISLR	-1.94973	13.1939	0.000280868	0.00466069	-1
ENSG00000137868	64220	STRA6	-2.00928	15.1326	0.000100216	0.00192726	-1
ENSG00000136425	10518	CIB2	-2.68426	22.0363	2.67545e-06	7.92608e-05	-1
ENSG00000136378	11173	ADAMTS7	-2.85818	27.3322	1.7133e-07	6.70447e-06	-1
ENSG00000166965	91433	RCCD1	-1.58546	9.19927	0.00242112	0.0291851	-1
ENSG00000176463	28232	SLCO3A1	-2.92742	26.9364	2.1026e-07	8.02814e-06	-1
ENSG00000140563	55784	MCTP2	-3.58239	29.6106	5.28161e-08	2.29517e-06	-1
ENSG00000182253	23336	SYNM	-6.93906	112.518	2.75124e-26	3.32921e-23	-1
ENSG00000184254	220	ALDH1A3	-2.32009	20.3563	6.42826e-06	0.000173156	-1
ENSG00000278456	NA		-2.28621	9.80005	0.00174508	0.0221743	-1
ENSG00000259658	100128108	UBE2Q2P13	-4.68296	22.3898	2.22556e-06	6.75875e-05	-1
ENSG00000127585	146330	FBXL16	-4.6431	44.3582	2.7346e-11	2.22891e-09	-1
ENSG00000102854	10232	MSLN	-2.3741	14.0567	0.000177384	0.00314238	-1
ENSG00000260807	115804232	CEROX1	-7.39378	44.1666	3.01588e-11	2.43297e-09	-1
ENSG00000183971	283869	NPW	-5.6149	57.0352	4.28078e-14	5.75563e-12	-1
ENSG00000118898	5493	PPL	-2.4985	15.8665	6.79696e-05	0.00138425	-1
ENSG00000166669	80063	ATF7IP2	-5.91761	39.7217	2.92856e-10	1.98574e-08	-1
ENSG00000103489	64131	XYLT1	-1.70287	13.3557	0.000257634	0.0043548	-1
ENSG00000103485	23475	QPRT	-4.5771	57.4986	3.38225e-14	4.88129e-12	-1
ENSG00000174938	26470	SEZ6L2	-4.52554	65.652	5.38005e-16	1.09914e-13	-1
ENSG00000174939	253982	ASPHD1	-2.87839	22.5033	2.09783e-06	6.43295e-05	-1
ENSG00000131797	100132341	CLUHP3	-2.72628	19.2432	1.15079e-05	0.000286894	-1
ENSG00000260549	4500	MT1L	-5.85501	23.7044	1.12327e-06	3.63583e-05	-1
ENSG00000205078	100130958	SYCE1L	-2.5695	10.854	0.000985844	0.013822	-1
ENSG00000186153	51741	WWOX	-1.70922	10.4682	0.00121448	0.0163158	-1
ENSG00000178573	4094	MAF	-6.4476	56.6363	5.24361e-14	6.81998e-12	-1
ENSG00000270124	NA		-2.49866	18.1124	2.08239e-05	0.000485304	-1
ENSG00000129910	1013	CDH15	-3.03255	10.1169	0.00146915	0.0190844	-1
ENSG00000261373	100128881	VPS9D1-AS1	-3.1171	22.6816	1.91185e-06	5.93202e-05	-1
ENSG00000167705	83547	RILP	-1.64941	9.16347	0.00246894	0.0296933	-1
ENSG00000132386	5176	SERPINF1	-1.8521	15.6986	7.42783e-05	0.00148472	-1
ENSG00000074370	489	ATP2A3	-3.31577	29.6511	5.17237e-08	2.25392e-06	-1
ENSG00000161921	58191	CXCL16	-1.55714	10.038	0.00153345	0.0197889	-1
ENSG00000182853	284013	VMO1	-2.59174	17.0702	3.60223e-05	0.000792541	-1
ENSG00000174292	8711	TNK1	-2.18987	9.6113	0.00193384	0.0242014	-1
ENSG00000181284	284114	TMEM102	-2.04161	11.2363	0.000802122	0.0115976	-1
ENSG00000161955	8741	TNFSF13	-2.75678	13.4132	0.000249863	0.0042493	-1
ENSG00000129244	482	ATP1B2	-6.31673	28.9233	7.53028e-08	3.1589e-06	-1
ENSG00000141510	7157	TP53	-2.19627	21.3824	3.7621e-06	0.000107213	-1
ENSG00000108947	1949	EFNB3	-5.06363	68.0144	1.62304e-16	3.81075e-14	-1
ENSG00000154914	124739	USP43	-6.72372	34.7394	3.76925e-09	2.0952e-07	-1
ENSG00000007237	8522	GAS7	-7.78259	72.507	1.66444e-17	4.94025e-15	-1
ENSG00000141314	162494	RHBDL3	-8.08946	55.8362	7.87671e-14	1.00739e-11	-1
ENSG00000161381	57125	PLXDC1	-2.46899	16.5147	4.82731e-05	0.00102343	-1
ENSG00000131771	84152	PPP1R1B	-3.11219	17.3527	3.10458e-05	0.000692739	-1
ENSG00000167925	84514	GHDC	-4.283	56.7518	4.94431e-14	6.53604e-12	-1
ENSG00000005102	4222	MEOX1	-2.41186	12.7502	0.000355975	0.00573755	-1
ENSG00000184922	752	FMNL1	-2.85395	24.9923	5.75608e-07	2.03024e-05	-1
ENSG00000182575	11248	NXPH3	-1.93405	12.9033	0.000328006	0.00536368	-1
ENSG00000167100	201191	SAMD14	-2.19123	17.4472	2.95403e-05	0.000666713	-1
ENSG00000153930	162282	ANKFN1	-3.34888	32.363	1.27899e-08	6.32696e-07	-1
ENSG00000267280	103689912	TBX2-AS1	-2.23711	12.8467	0.000338077	0.00549977	-1
ENSG00000121075	9496	TBX4	-4.75075	23.3974	1.31759e-06	4.22348e-05	-1
ENSG00000279369	NA		-2.15742	8.88885	0.00286917	0.0338391	-1
ENSG00000271605	284021	MILR1	-2.09986	9.52267	0.00202949	0.0251782	-1
ENSG00000168646	8313	AXIN2	-1.91602	11.8881	0.000564929	0.00856981	-1
ENSG00000141338	10351	ABCA8	-1.98439	10.6349	0.00110974	0.0151934	-1
ENSG00000154258	10350	ABCA9	-1.75842	8.15066	0.00430456	0.0477539	-1
ENSG00000154262	23460	ABCA6	-2.73686	24.1597	8.86664e-07	2.98675e-05	-1
ENSG00000123700	3759	KCNJ2	-2.34569	8.91904	0.00282213	0.0333545	-1
ENSG00000167861	283987	HID1	-5.8395	38.5763	5.26556e-10	3.43703e-08	-1
ENSG00000132470	3691	ITGB4	-1.80677	10.6541	0.00109829	0.015063	-1
ENSG00000141576	114804	RNF157	-2.23997	16.6534	4.48707e-05	0.000962976	-1
ENSG00000161544	114757	CYGB	-3.70856	41.4832	1.18886e-10	8.71555e-09	-1
ENSG00000158270	81035	COLEC12	-1.57512	11.5897	0.000663191	0.0097684	-1
ENSG00000154065	147463	ANKRD29	-3.85404	47.0173	7.03633e-12	6.36141e-10	-1
ENSG00000267414	101927943	SETBP1-DT	-2.82631	22.4437	2.16399e-06	6.59722e-05	-1
ENSG00000152217	26040	SETBP1	-1.72435	13.2826	0.000267874	0.00448768	-1
ENSG00000141469	6563	SLC14A1	-1.52603	8.58266	0.00339379	0.0389785	-1
ENSG00000267787	NA		-1.83115	8.92356	0.00281515	0.0332971	-1
ENSG00000221887	284293	HMSD	-4.87199	14.3808	0.000149317	0.00272811	-1
ENSG00000206052	220164	DOK6	-3.88162	18.2182	1.96986e-05	0.000461128	-1
ENSG00000287281	107985177	LOC107985177	-5.83854	23.7314	1.10759e-06	3.61482e-05	-1
ENSG00000266256	284276,400660	LINC00908,LINC00683	-2.85915	21.1074	4.34253e-06	0.000121769	-1
ENSG00000131196	4772	NFATC1	-5.86968	78.8469	6.71163e-19	2.51383e-16	-1
ENSG00000178184	84552	PARD6G	-2.53653	17.6342	2.67724e-05	0.000609489	-1
ENSG00000088881	57593	EBF4	-4.32902	52.8406	3.61742e-13	4.18424e-11	-1
ENSG00000132622	116835	HSPA12B	-6.96857	57.5099	3.36277e-14	4.88129e-12	-1
ENSG00000101265	9770	RASSF2	-1.4353	8.37596	0.00380218	0.0427534	-1
ENSG00000205181	149837	LINC00654	-1.82347	11.9274	0.000553136	0.00843157	-1
ENSG00000101311	55612	FERMT1	-4.7871	33.9377	5.69062e-09	3.06573e-07	-1
ENSG00000125845	650	BMP2	-2.51432	18.1028	2.09294e-05	0.000487041	-1
ENSG00000172264	140733	MACROD2	-1.91097	10.6499	0.00110078	0.0150839	-1
ENSG00000125848	23767	FLRT3	-3.67173	32.415	1.24523e-08	6.19896e-07	-1
ENSG00000235217	128854	TSPY26P	-2.91291	25.5794	4.24542e-07	1.52476e-05	-1
ENSG00000101460	84557	MAP1LC3A	-1.48291	9.41964	0.00214673	0.0263624	-1
ENSG00000088340	80307	FER1L4	-2.29209	14.7923	0.000120025	0.00225312	-1
ENSG00000198959	7052	TGM2	-1.36976	9.0986	0.00255805	0.0306947	-1
ENSG00000100979	5360	PLTP	-2.8826	26.405	2.76825e-07	1.02706e-05	-1
ENSG00000196562	55959	SULF2	-1.82701	11.6195	0.000652641	0.00968556	-1
ENSG00000124126	57580	PREX1	-5.62636	64.6338	9.0196e-16	1.7517e-13	-1
ENSG00000158445	3745	KCNB1	-1.61093	9.67032	0.00187269	0.0234923	-1
ENSG00000124212	5740	PTGIS	-1.87814	16.1511	5.84832e-05	0.00121693	-1
ENSG00000042062	140876	RIPOR3	-3.38234	29.7783	4.84371e-08	2.12839e-06	-1
ENSG00000124225	56937	PMEPA1	-2.63969	28.3858	9.93926e-08	4.02976e-06	-1
ENSG00000278709	105416157	NKILA	-3.15642	18.6947	1.53406e-05	0.000368433	-1
ENSG00000101210	1917	EEF1A2	-2.8585	20.1552	7.14072e-06	0.000189109	-1
ENSG00000125531	79025	FNDC11	-3.53215	17.265	3.25113e-05	0.000723388	-1
ENSG00000130590	140700	SAMD10	-1.94406	9.9035	0.00164965	0.0210467	-1
ENSG00000129946	25759	SHC2	-7.77047	87.4447	8.66708e-21	4.13157e-18	-1
ENSG00000129951	79948	PLPPR3	-2.18491	10.0144	0.00155318	0.0199943	-1
ENSG00000197766	1675	CFD	-3.15188	11.1979	0.000818894	0.0117537	-1
ENSG00000065717	7089	TLE2	-2.4103	16.3303	5.32053e-05	0.001113	-1
ENSG00000178078	55620	STAP2	-3.67255	30.5355	3.27819e-08	1.49044e-06	-1
ENSG00000090661	79603	CERS4	-3.19257	29.5526	5.44186e-08	2.35829e-06	-1
ENSG00000105088	93145	OLFM2	-2.03701	18.4691	1.7268e-05	0.000411581	-1
ENSG00000090339	3383	ICAM1	-1.63166	10.8182	0.00100508	0.0139919	-1
ENSG00000223547	284391	ZNF844	-5.94454	48.6394	3.07627e-12	3.00577e-10	-1
ENSG00000104903	4066	LYL1	-4.35217	23.9187	1.00492e-06	3.33509e-05	-1
ENSG00000141837	773	CACNA1A	-6.39407	90.1159	2.24607e-21	1.17776e-18	-1
ENSG00000130513	9518	GDF15	-2.43389	20.6269	5.58058e-06	0.000152941	-1
ENSG00000105655	51477	ISYNA1	-2.34366	19.2041	1.17464e-05	0.000292377	-1
ENSG00000160161	148113	CILP2	-1.98622	11.7538	0.000607197	0.00910564	-1
ENSG00000245848	1050	CEBPA	-3.23055	30.6011	3.16914e-08	1.44504e-06	-1
ENSG00000267296	80054	CEBPA-DT	-4.16794	24.6967	6.70992e-07	2.33526e-05	-1
ENSG00000004776	126393	HSPB6	-3.33121	37.6608	8.41812e-10	5.31829e-08	-1
ENSG00000226686	101927667	LINC01535	-4.80585	29.7888	4.81763e-08	2.12839e-06	-1
ENSG00000128011	57622	LRFN1	-5.69775	22.0607	2.64165e-06	7.84073e-05	-1
ENSG00000177191	374907	B3GNT8	-3.68416	29.7332	4.95782e-08	2.17176e-06	-1
ENSG00000125740	2354	FOSB	-1.40662	9.43511	0.0021287	0.0262023	-1
ENSG00000221923	400713	ZNF880	-5.50864	64.1435	1.15677e-15	2.21916e-13	-1
ENSG00000198046	63934	ZNF667	-5.61583	55.7816	8.0984e-14	1.02739e-11	-1
ENSG00000166770	100128252	ZNF667-AS1	-5.80061	64.7822	8.36504e-16	1.6657e-13	-1
ENSG00000083814	79891	ZNF671	-2.40283	13.3786	0.000254511	0.0043097	-1
ENSG00000178026	388886	LRRC75B	-3.31922	33.089	8.80346e-09	4.49634e-07	-1
ENSG00000197077	85379	KIAA1671	-2.56231	10.0696	0.00150734	0.019516	-1
ENSG00000100336	80832	APOL4	-2.39278	16.6	4.61512e-05	0.000986418	-1
ENSG00000100385	3560	IL2RB	-2.11627	10.7749	0.00102888	0.0142656	-1
ENSG00000128340	5880	RAC2	-2.21216	19.6669	9.21867e-06	0.000236187	-1
ENSG00000128274	53947	A4GALT	-3.93856	46.9465	7.29529e-12	6.52058e-10	-1
ENSG00000138944	85352	SHISAL1	-1.68873	11.2803	0.000783336	0.0113629	-1
ENSG00000128408	26150	RIBC2	-5.78428	22.792	1.80513e-06	5.63421e-05	-1
ENSG00000075275	9620	CELSR1	-3.10878	35.3766	2.71729e-09	1.5321e-07	-1
ENSG00000073150	56666	PANX2	-1.97085	13.847	0.000198315	0.00346247	-1
ENSG00000128165	79924	ADM2	-3.63163	32.0009	1.54099e-08	7.4819e-07	-1
ENSG00000215386	388815	MIR99AHG	-2.15546	12.5117	0.000404414	0.00646529	-1
ENSG00000154721	58494	JAM2	-3.92417	53.299	2.86446e-13	3.36275e-11	-1
ENSG00000198743	6526	SLC5A3	-1.3483	8.58221	0.00339463	0.0389785	-1
ENSG00000234380	100506385	LINC01426	-2.30693	10.3679	0.00128222	0.0169786	-1
ENSG00000157542	3763	KCNJ6	-1.98796	10.2484	0.00136803	0.0179637	-1
ENSG00000183570	54039	PCBP3	-2.05942	10.0766	0.00150166	0.0194585	-1
ENSG00000227232	NA	WASH7P	0.44639	0.553263	0.456987	0.792122	0
ENSG00000279457	NA	WASH9P	0.328602	0.334356	0.563105	0.834028	0
ENSG00000225630	100652939	MTND2P28	0.399131	0.760177	0.383273	0.754744	0
ENSG00000237973	107075141	MTCO1P12	-0.192253	0.150833	0.697741	0.884368	0
ENSG00000229344	107075310	MTCO2P12	0.893648	2.10309	0.147002	0.555328	0
ENSG00000248527	106480796	MTATP6P1	0.287967	0.415257	0.519313	0.81908	0
ENSG00000198744	107075270	MTCO3P12	0.140257	0.0480936	0.826414	0.935014	0
ENSG00000228327	NA		-0.0967107	0.026828	0.869895	0.952413	0
ENSG00000230092	NA		-0.205006	0.0948901	0.75805	0.908217	0
ENSG00000228794	643837	LINC01128	0.881207	3.36074	0.0667682	0.362683	0
ENSG00000230699	NA		0.744024	1.45464	0.227785	0.6586	0
ENSG00000223764	100130417	LINC02593	-0.0260511	0.00266379	0.958838	0.987358	0
ENSG00000187634	148398	SAMD11	-0.42608	0.846268	0.35761	0.742163	0
ENSG00000188976	26155	NOC2L	0.700725	2.41105	0.120482	0.505009	0
ENSG00000187961	339451	KLHL17	0.497943	0.987763	0.32029	0.719166	0
ENSG00000187583	84069	PLEKHN1	0.265159	0.259593	0.6104	0.851341	0
ENSG00000272512	NA		0.901835	1.85133	0.173629	0.597867	0
ENSG00000188290	57801	HES4	1.0554	4.59913	0.0319882	0.223548	0
ENSG00000131591	54991	C1orf159	0.16007	0.103595	0.747557	0.904558	0
ENSG00000078808	51150	SDF4	-0.0603895	0.0185599	0.891636	0.962347	0
ENSG00000176022	126792	B3GALT6	-0.475901	1.06786	0.30143	0.704994	0
ENSG00000160087	118424	UBE2J2	0.0278362	0.00374524	0.951201	0.984325	0
ENSG00000230415	NA	LINC01786	-0.0426319	0.00456577	0.946128	0.982214	0
ENSG00000162572	6339	SCNN1D	-0.269621	0.261697	0.608957	0.850452	0
ENSG00000131584	116983	ACAP3	0.523374	1.3114	0.252141	0.674449	0
ENSG00000169972	126789	PUSL1	0.137907	0.0827186	0.773647	0.913565	0
ENSG00000127054	54973	INTS11	0.385533	0.721819	0.395548	0.763813	0
ENSG00000240731	NA		-0.81448	1.45805	0.227241	0.658001	0
ENSG00000224051	80772	CPTP	0.0680348	0.0212961	0.883975	0.959684	0
ENSG00000169962	83756	TAS1R3	0.0352993	0.0029011	0.957045	0.986646	0
ENSG00000107404	1855	DVL1	0.0118926	0.000694368	0.978977	0.994466	0
ENSG00000162576	54587	MXRA8	0.325145	0.544878	0.460418	0.793505	0
ENSG00000175756	54998	AURKAIP1	0.256843	0.317403	0.573173	0.836897	0
ENSG00000221978	81669	CCNL2	-0.118426	0.0659912	0.797266	0.923548	0
ENSG00000224870	148413	MRPL20-AS1	0.500259	1.0544	0.304496	0.706603	0
ENSG00000242485	55052	MRPL20	0.0158345	0.00118375	0.972554	0.991471	0
ENSG00000272455	NA	MRPL20-DT	0.851473	2.24924	0.13368	0.532546	0
ENSG00000160072	83858	ATAD3B	0.138961	0.0810135	0.775929	0.914317	0
ENSG00000197785	55210	ATAD3A	0.633597	1.85691	0.172982	0.59675	0
ENSG00000205090	339453	TMEM240	-1.37303	6.59441	0.0102299	0.0958469	0
ENSG00000160075	29101	SSU72	0.354738	0.620981	0.430683	0.779501	0
ENSG00000215014	NA		1.27936	3.69172	0.0546832	0.319997	0
ENSG00000272106	NA		-0.188314	0.125766	0.722863	0.894105	0
ENSG00000197530	142678	MIB2	0.286193	0.391204	0.531667	0.823032	0
ENSG00000248333	984	CDK11B	0.490568	1.11754	0.290449	0.697565	0
ENSG00000189339	728661	SLC35E2B	0.0374328	0.00662039	0.935151	0.978236	0
ENSG00000008128	728642	CDK11A	0.340648	0.432531	0.51075	0.81563	0
ENSG00000268575	NA		0.155959	0.0768162	0.781659	0.916654	0
ENSG00000215790	NA	SLC35E2A	-0.084346	0.0343575	0.852949	0.945843	0
ENSG00000008130	65220	NADK	0.502489	1.21832	0.26969	0.68658	0
ENSG00000078369	2782	GNB1	0.455979	1.06649	0.301739	0.705221	0
ENSG00000178821	339456	TMEM52	-1.78326	6.45644	0.0110551	0.101879	0
ENSG00000067606	5590	PRKCZ	0.644682	1.19172	0.274982	0.68901	0
ENSG00000182873	100506504	PRKCZ-AS1	1.26988	5.57132	0.018257	0.148578	0
ENSG00000162585	199990	FAAP20	-0.114363	0.0627827	0.802151	0.92512	0
ENSG00000157933	6497	SKI	0.283282	0.406526	0.523738	0.820528	0
ENSG00000287356	NA		0.37238	0.398246	0.527997	0.82151	0
ENSG00000116151	79906	MORN1	0.48257	0.857447	0.354454	0.740199	0
ENSG00000269896	100129534	LOC100129534	1.16068	4.55701	0.0327843	0.227495	0
ENSG00000157916	11079	RER1	0.408792	0.830988	0.361987	0.745611	0
ENSG00000157911	5192	PEX10	-0.192419	0.168645	0.681319	0.877787	0
ENSG00000157881	55229	PANK4	0.162291	0.120295	0.728715	0.896685	0
ENSG00000238164	NA	TNFRSF14-AS1	2.04092	7.64017	0.00570826	0.0605915	0
ENSG00000157873	8764	TNFRSF14	-0.863887	2.99787	0.0833742	0.416236	0
ENSG00000157870	127281	PRXL2B	0.611731	1.74229	0.186849	0.614393	0
ENSG00000162591	1953	MEGF6	-0.806961	3.23683	0.0719999	0.381614	0
ENSG00000158109	127262	TPRG1L	0.378943	0.703921	0.401469	0.76561	0
ENSG00000116213	49856	WRAP73	0.533377	1.19479	0.274364	0.688691	0
ENSG00000130764	57470	LRRC47	0.384101	0.716894	0.397165	0.76398	0
ENSG00000116198	9731	CEP104	0.746684	2.62845	0.104964	0.47123	0
ENSG00000169598	1677	DFFB	0.302436	0.355676	0.550917	0.828891	0
ENSG00000198912	339448	C1orf174	0.285677	0.365076	0.545701	0.827991	0
ENSG00000131697	261734	NPHP4	0.121405	0.0633108	0.801338	0.924798	0
ENSG00000069424	8514	KCNAB2	0.653884	1.96469	0.161013	0.576838	0
ENSG00000116251	6146	RPL22	0.156861	0.121938	0.726942	0.895725	0
ENSG00000158286	388591	RNF207	-1.52648	8.01143	0.0046483	0.0511703	0
ENSG00000116237	23463	ICMT	0.599947	1.79492	0.180328	0.60627	0
ENSG00000158292	387509	GPR153	-0.785529	2.80129	0.0941887	0.447503	0
ENSG00000097021	11332	ACOT7	0.811482	3.11163	0.0777352	0.399173	0
ENSG00000215788	8718	TNFRSF25	0.289673	0.286172	0.592684	0.845133	0
ENSG00000171680	57449	PLEKHG5	0.0688067	0.0195965	0.88867	0.961614	0
ENSG00000162408	79707	NOL9	0.420248	0.795986	0.372296	0.751855	0
ENSG00000204859	3104	ZBTB48	0.22096	0.197655	0.65662	0.867316	0
ENSG00000116273	148479	PHF13	0.52684	1.34444	0.246253	0.67172	0
ENSG00000041988	90326	THAP3	0.020224	0.00172655	0.966856	0.98968	0
ENSG00000007923	55735	DNAJC11	0.474748	1.09124	0.296196	0.701727	0
ENSG00000171735	23261	CAMTA1	0.398986	0.744956	0.388078	0.757802	0
ENSG00000049245	9341	VAMP3	0.349478	0.610802	0.434486	0.781301	0
ENSG00000049246	8863	PER3	0.85428	3.47909	0.0621487	0.347535	0
ENSG00000116288	11315	PARK7	0.168197	0.140819	0.707469	0.887071	0
ENSG00000116285	54206	ERRFI1	-0.621046	1.79541	0.180269	0.606201	0
ENSG00000162426	50651	SLC45A1	-0.054796	0.0106482	0.917812	0.972899	0
ENSG00000142599	473	RERE	-0.045566	0.0102876	0.919211	0.97322	0
ENSG00000074800	2023	ENO1	0.815885	3.42933	0.0640482	0.354269	0
ENSG00000238249	NA	HMGN2P17	1.30808	4.286	0.0384275	0.256037	0
ENSG00000180758	80045	GPR157	0.772944	2.42066	0.119745	0.503089	0
ENSG00000049239	9563	H6PD	-0.670731	2.24474	0.134069	0.532814	0
ENSG00000171621	80176	SPSB1	0.696462	2.28643	0.13051	0.526493	0
ENSG00000284693	100506022	LINC02606	0.476963	0.800787	0.370858	0.750859	0
ENSG00000171612	84275	SLC25A33	0.832001	2.6465	0.103778	0.469856	0
ENSG00000188807	199953	TMEM201	0.269657	0.326163	0.567927	0.835116	0
ENSG00000171608	5293	PIK3CD	-0.350354	0.577911	0.447132	0.787454	0
ENSG00000171603	22883	CLSTN1	0.102732	0.0538975	0.816415	0.931372	0
ENSG00000178585	56998	CTNNBIP1	0.156589	0.112301	0.73754	0.900024	0
ENSG00000162441	84328	LZIC	0.0366281	0.00641169	0.936179	0.978281	0
ENSG00000173614	64802	NMNAT1	-0.0535032	0.0122062	0.912027	0.97057	0
ENSG00000130939	10277	UBE4B	0.0487428	0.0116781	0.913944	0.971249	0
ENSG00000054523	23095	KIF1B	0.505825	1.25468	0.26266	0.682259	0
ENSG00000142657	5226	PGD	0.687674	2.32557	0.127264	0.520674	0
ENSG00000175279	378708	CENPS	0.219159	0.162071	0.687256	0.879884	0
ENSG00000160049	1676	DFFA	-0.0701778	0.0240128	0.876852	0.95635	0
ENSG00000142655	5195	PEX14	0.265987	0.33059	0.565312	0.834476	0
ENSG00000130940	54897	CASZ1	-0.338433	0.213887	0.643737	0.862796	0
ENSG00000120948	23435	TARDBP	0.295798	0.430434	0.511776	0.816021	0
ENSG00000271895			0.25861	0.181652	0.669957	0.871864	0
ENSG00000116649	6723	SRM	0.215485	0.228374	0.632732	0.857027	0
ENSG00000171824	5394	EXOSC10	0.409956	0.817935	0.365785	0.747973	0
ENSG00000198793	2475	MTOR	0.706674	2.43333	0.11878	0.501215	0
ENSG00000120942	29914	UBIAD1	0.0773507	0.0271379	0.869152	0.952136	0
ENSG00000132879	93611	FBXO44	-0.595165	1.51311	0.218666	0.646685	0
ENSG00000116663	26270	FBXO6	-0.110589	0.0476342	0.827232	0.935259	0
ENSG00000116670	10459	MAD2L2	0.229576	0.243927	0.621384	0.852788	0
ENSG00000177674	57085	AGTRAP	-0.494132	1.02828	0.310562	0.711269	0
ENSG00000215910	284498	C1orf167	0.313577	0.138119	0.710158	0.888601	0
ENSG00000177000	4524	MTHFR	0.370067	0.637771	0.424519	0.775983	0
ENSG00000011021	1185	CLCN6	0.734574	2.43573	0.118598	0.50112	0
ENSG00000116685	90231	KIAA2013	0.257128	0.326287	0.567854	0.835116	0
ENSG00000083444	5351	PLOD1	0.0393606	0.00798281	0.928806	0.976022	0
ENSG00000116688	9927	MFN2	0.407231	0.821928	0.364617	0.746677	0
ENSG00000116691	60672	MIIP	0.716498	2.07607	0.149625	0.558954	0
ENSG00000048707	55187	VPS13D	0.286134	0.402044	0.526035	0.820824	0
ENSG00000116731	7799	PRDM2	0.778739	2.89826	0.088675	0.430672	0
ENSG00000189337	23254	KAZN	0.624092	1.73175	0.188187	0.615975	0
ENSG00000142634	79180	EFHD2	0.0932827	0.0426495	0.836387	0.93903	0
ENSG00000132906	842	CASP9	0.85626	3.03103	0.0816862	0.41107	0
ENSG00000116138	23341	DNAJC16	0.0504488	0.0116855	0.913917	0.971249	0
ENSG00000116771	79814	AGMAT	-0.474175	0.779676	0.37724	0.752922	0
ENSG00000197312	84301	DDI2	0.0366941	0.00629745	0.936749	0.978542	0
ENSG00000116786	23207	PLEKHM2	0.139178	0.0961292	0.756525	0.907496	0
ENSG00000162461	284723	SLC25A34	1.0446	3.27899	0.070172	0.374195	0
ENSG00000162458	54751	FBLIM1	-0.0130603	0.000860728	0.976595	0.993328	0
ENSG00000233954	440567	UQCRHL	0.322162	0.340539	0.559518	0.833067	0
ENSG00000178715	441876	RPS16P1	0.30566	0.228441	0.632683	0.857027	0
ENSG00000179743	729614	SPEN-AS1	0.993291	3.51269	0.0609006	0.343995	0
ENSG00000065526	23013	SPEN	0.440959	0.971134	0.324398	0.720777	0
ENSG00000116809	7709	ZBTB17	0.396798	0.730411	0.39275	0.7615	0
ENSG00000184908	1188	CLCNKB	0.0669225	0.00886423	0.92499	0.974801	0
ENSG00000185519	348487	FAM131C	1.42765	4.5274	0.0333563	0.230447	0
ENSG00000227959	NA	EPHA2-AS1	-0.155466	0.0573307	0.810766	0.928994	0
ENSG00000142632	128272	ARHGEF19	0.68124	1.88838	0.169385	0.591262	0
ENSG00000237276	NA	ANO7L1	0.45182	0.659829	0.41662	0.772543	0
ENSG00000288398	NA		-0.432411	0.715996	0.39746	0.764078	0
ENSG00000132881	79363	CPLANE2	-0.475571	0.796266	0.372212	0.751832	0
ENSG00000037637	54455	FBXO42	0.0887409	0.0374073	0.846638	0.943702	0
ENSG00000055070	26099	SZRD1	0.220806	0.246934	0.619243	0.851754	0
ENSG00000157191	55707	NECAP2	0.145809	0.104258	0.746779	0.904187	0
ENSG00000226029	107984921	LINC01772	0.572369	0.858221	0.354237	0.739942	0
ENSG00000080947	114819	CROCCP3	0.187443	0.117751	0.731487	0.897613	0
ENSG00000219481	55672	NBPF1	0.225688	0.22967	0.631768	0.856533	0
ENSG00000215908	84809	CROCCP2	0.428839	0.800273	0.371012	0.750859	0
ENSG00000236698	NA	EIF1AXP1	0.879155	2.05295	0.151912	0.56348	0
ENSG00000058453	9696	CROCC	0.254668	0.304498	0.581076	0.84	0
ENSG00000238142	105376805	LOC105376805	0.0549541	0.00991391	0.920687	0.973799	0
ENSG00000117122	4237	MFAP2	-0.692658	2.30867	0.128654	0.523532	0
ENSG00000286898	105376806	LOC105376806	-1.20206	3.18249	0.0744311	0.389151	0
ENSG00000159363	23400	ATP13A2	0.639847	1.89275	0.168893	0.590549	0
ENSG00000117118	6390	SDHB	0.752446	2.72348	0.098882	0.458806	0
ENSG00000179051	55920	RCC2	0.168916	0.14191	0.706389	0.886639	0
ENSG00000074964	55160	ARHGEF10L	0.00774313	0.000282548	0.986589	0.996087	0
ENSG00000159423	8659	ALDH4A1	1.28078	6.62632	0.0100483	0.0945639	0
ENSG00000169991	126917	IFFO2	0.996705	4.63438	0.0313375	0.220569	0
ENSG00000272084	NA		1.32039	3.97329	0.0462274	0.287651	0
ENSG00000127481	23352	UBR4	0.30175	0.463121	0.496169	0.808318	0
ENSG00000230424	101927895	EMC1-AS1	-0.643127	1.28684	0.256631	0.677935	0
ENSG00000127463	23065	EMC1	0.213397	0.226446	0.634172	0.857536	0
ENSG00000053372	51154	MRTO4	0.184905	0.16398	0.685518	0.879884	0
ENSG00000053371	8574	AKR7A2	0.070781	0.023997	0.876893	0.95635	0
ENSG00000040487	54896	SLC66A1	0.252407	0.276872	0.598759	0.847649	0
ENSG00000077549	832	CAPZB	0.36125	0.668385	0.413615	0.771199	0
ENSG00000173436	440574	MICOS10	0.0658087	0.018736	0.891126	0.962227	0
ENSG00000158747	4681,100532736	NBL1,MICOS10-NBL1	-0.737068	2.72871	0.098559	0.458186	0
ENSG00000226396	NA		0.0264235	0.00263067	0.959094	0.987403	0
ENSG00000162542	255104	TMCO4	0.312302	0.463067	0.496194	0.808318	0
ENSG00000169914	23252	OTUD3	0.626409	1.68571	0.194167	0.620759	0
ENSG00000162545	55450	CAMK2N1	0.98582	4.85803	0.0275177	0.202565	0
ENSG00000090432	79594	MUL1	0.166228	0.13263	0.715721	0.890579	0
ENSG00000158828	65018	PINK1	0.67888	2.27204	0.131727	0.528756	0
ENSG00000117242	100861548	PINK1-AS	-0.0428469	0.00801264	0.928674	0.975948	0
ENSG00000244038	1650	DDOST	0.177865	0.161467	0.68781	0.879884	0
ENSG00000117245	57576	KIF17	0.719717	1.59296	0.206903	0.633845	0
ENSG00000127483	50809	HP1BP3	0.41283	0.864757	0.352411	0.738961	0
ENSG00000075151	8672	EIF4G3	0.395279	0.776696	0.378153	0.753346	0
ENSG00000117298	1889	ECE1	0.150918	0.116211	0.733181	0.898331	0
ENSG00000227001	NA	NBPF2P	0.913842	3.11877	0.0773953	0.398268	0
ENSG00000187952	NA	HS6ST1P1	0.790223	1.47474	0.2246	0.654817	0
ENSG00000142794	84224	NBPF3	1.15927	6.40817	0.0113596	0.104197	0
ENSG00000162551	249	ALPL	0.640017	1.04669	0.306271	0.707418	0
ENSG00000090686	84196	USP48	0.361122	0.638122	0.424392	0.775983	0
ENSG00000187942	401944	LDLRAD2	0.166272	0.0981964	0.754005	0.906595	0
ENSG00000142798	3339	HSPG2	0.373777	0.722446	0.395343	0.763646	0
ENSG00000218510	29092	LINC00339	-0.415667	0.67544	0.411161	0.770308	0
ENSG00000070831	998	CDC42	0.537656	1.46276	0.226492	0.656765	0
ENSG00000162552	54361	WNT4	0.976255	2.39805	0.121486	0.50801	0
ENSG00000184677	9923	ZBTB40	0.134237	0.0845486	0.771225	0.912818	0
ENSG00000133216	2048	EPHB2	1.01499	3.63606	0.0565404	0.326809	0
ENSG00000004487	23028	KDM1A	0.320828	0.510852	0.47477	0.799222	0
ENSG00000169641	7798	LUZP1	0.874934	3.76739	0.0522612	0.310351	0
ENSG00000261326	NA	LINC01355	-0.776919	1.64487	0.199658	0.625661	0
ENSG00000125944	10236	HNRNPR	0.484597	1.18272	0.276803	0.689037	0
ENSG00000125945	80818	ZNF436	-0.380138	0.65324	0.418957	0.773632	0
ENSG00000249087	148898	ZNF436-AS1	-0.89682	2.36207	0.124317	0.514245	0
ENSG00000204219	6920	TCEA3	1.35646	7.02843	0.00802256	0.079124	0
ENSG00000088280	55616	ASAP3	-0.381551	0.66812	0.413708	0.771199	0
ENSG00000007968	1870	E2F2	1.04033	4.04007	0.0444319	0.280256	0
ENSG00000142676	6135	RPL11	0.365052	0.686434	0.40738	0.768794	0
ENSG00000236810	100506963	ELOA-AS1	-0.376283	0.464011	0.495756	0.808318	0
ENSG00000011007	6924	ELOA	0.909803	4.03364	0.0446015	0.280598	0
ENSG00000057757	57095	PITHD1	0.568114	1.53588	0.215232	0.644041	0
ENSG00000011009	11313	LYPLA2	0.394117	0.729762	0.39296	0.761663	0
ENSG00000117308	2582	GALE	0.660141	1.8465	0.174191	0.598297	0
ENSG00000117305	3155	HMGCL	-0.0652866	0.0191685	0.889885	0.961953	0
ENSG00000179163	2517	FUCA1	-1.37757	7.19842	0.00729679	0.0732519	0
ENSG00000189266	55629	PNRC2	0.721526	2.51476	0.112785	0.487558	0
ENSG00000188529	10772	SRSF10	0.563416	1.55444	0.212481	0.64045	0
ENSG00000001460	90529	STPG1	0.714457	2.12781	0.144647	0.551756	0
ENSG00000001461	57185	NIPAL3	0.935585	4.27398	0.0387002	0.256983	0
ENSG00000117602	11123	RCAN3	0.861874	3.41677	0.0645374	0.355445	0
ENSG00000133226	10250	SRRM1	0.269241	0.357851	0.549702	0.828798	0
ENSG00000169504	25932	CLIC4	0.74156	2.83597	0.092175	0.441402	0
ENSG00000117614	25949	SYF2	0.183664	0.163177	0.686248	0.879884	0
ENSG00000117616	57035	RSRP1	-0.325942	0.438995	0.507608	0.8138	0
ENSG00000183726	23585	TMEM50A	0.516078	1.32235	0.25017	0.674126	0
ENSG00000188672	6006	RHCE	0.259675	0.168389	0.681547	0.877787	0
ENSG00000204178	55219	MACO1	0.316934	0.477905	0.489373	0.805263	0
ENSG00000157978	26119	LDLRAP1	0.588625	1.64016	0.200304	0.626687	0
ENSG00000225643	NA		1.00344	2.22102	0.136143	0.536022	0
ENSG00000162430	57190	SELENON	-0.227872	0.262562	0.608366	0.850235	0
ENSG00000228172	NA		-0.859191	1.63414	0.201131	0.627652	0
ENSG00000117640	56181	MTFR1L	-0.0162634	0.0012763	0.971501	0.99117	0
ENSG00000127423	79000	AUNIP	1.47607	7.48305	0.00622824	0.0649232	0
ENSG00000182749	164091	PAQR7	0.387064	0.697057	0.403774	0.766264	0
ENSG00000117632	3925	STMN1	0.817443	3.31577	0.0686183	0.368971	0
ENSG00000158006	5051	PAFAH2	0.170006	0.118011	0.731202	0.897514	0
ENSG00000158008	2134	EXTL1	-0.903913	2.36698	0.123927	0.513187	0
ENSG00000175087	149420	PDIK1L	0.653153	1.68216	0.194638	0.62084	0
ENSG00000142684	51042	ZNF593	-0.125165	0.0641646	0.800031	0.924356	0
ENSG00000142675	10256	CNKSR1	1.06452	2.90699	0.0881964	0.429662	0
ENSG00000130695	64793	CEP85	0.532644	1.19292	0.274741	0.6889	0
ENSG00000142669	83442	SH3BGRL3	0.335759	0.574692	0.4484	0.78796	0
ENSG00000158062	91544	UBXN11	-0.0646432	0.016736	0.897067	0.964688	0
ENSG00000117682	79947	DHDDS	0.466875	1.02901	0.310392	0.711269	0
ENSG00000198830	3151	HMGN2	0.923735	4.24074	0.039465	0.259859	0
ENSG00000117676	6195	RPS6KA1	1.23703	5.85844	0.0155025	0.1319	0
ENSG00000260063	101928728	LOC101928728	0.982225	2.68501	0.101297	0.465925	0
ENSG00000117713	8289	ARID1A	0.409829	0.833115	0.361373	0.745301	0
ENSG00000060642	55650	PIGV	0.182313	0.143323	0.705	0.886639	0
ENSG00000204160	84243	ZDHHC18	0.0428808	0.00875152	0.925467	0.974801	0
ENSG00000142751	54707	GPN2	0.184661	0.160147	0.689021	0.880003	0
ENSG00000198746	63906	GPATCH3	0.0567936	0.013669	0.906928	0.96867	0
ENSG00000090273	10726	NUDC	0.423044	0.885353	0.34674	0.734795	0
ENSG00000253368	388610	TRNP1	-0.925799	4.1933	0.0405841	0.264798	0
ENSG00000158246	115572	TENT5B	0.827296	2.13743	0.143742	0.549541	0
ENSG00000090020	6548	SLC9A1	0.217296	0.233678	0.62881	0.855175	0
ENSG00000142784	23038	WDTC1	0.0793583	0.0311476	0.859912	0.948018	0
ENSG00000186501	84065	TMEM222	0.318303	0.48584	0.485789	0.804492	0
ENSG00000241547	NA	ACTG1P20	-0.342063	0.240192	0.624068	0.853225	0
ENSG00000142733	9064	MAP3K6	0.0873976	0.0352455	0.851082	0.945325	0
ENSG00000181773	2827	GPR3	0.602952	1.22139	0.269087	0.685859	0
ENSG00000158195	10163	WASF2	0.376672	0.717835	0.396855	0.76398	0
ENSG00000126705	27245	AHDC1	0.274849	0.374749	0.540427	0.826186	0
ENSG00000009780	199870	FAM76A	0.628553	1.66024	0.197571	0.62347	0
ENSG00000117758	23673	STX12	0.572423	1.61322	0.20404	0.630789	0
ENSG00000117751	5511	PPP1R8	0.284999	0.393743	0.530338	0.822313	0
ENSG00000130775	9473	THEMIS2	0.761669	2.20644	0.137436	0.537203	0
ENSG00000117748	6118	RPA2	0.170552	0.138405	0.709872	0.888538	0
ENSG00000158156	55113	XKR8	0.12522	0.0629163	0.801945	0.925085	0
ENSG00000158161	2140	EYA3	0.291105	0.395984	0.529171	0.822019	0
ENSG00000228589	NA	SPCS2P4	0.410292	0.455017	0.499962	0.810063	0
ENSG00000169403	5724	PTAFR	0.483209	0.531233	0.466089	0.795518	0
ENSG00000126698	22826	DNAJC8	0.528893	1.38155	0.239838	0.667329	0
ENSG00000130770	93974	ATP5IF1	0.625473	1.87987	0.170349	0.592604	0
ENSG00000130766	83667	SESN2	0.301166	0.412053	0.520929	0.819895	0
ENSG00000130772	54797	MED18	-0.225266	0.21576	0.64229	0.861883	0
ENSG00000204138	65979	PHACTR4	0.46568	1.03709	0.308499	0.70961	0
ENSG00000180198	1104	RCC1	0.533466	1.36303	0.243012	0.670243	0
ENSG00000242125	8420	SNHG3	-0.285383	0.361829	0.547492	0.828374	0
ENSG00000200087	26768	SNORA73B	-0.653199	1.37785	0.240467	0.667641	0
ENSG00000279443	NA		1.07327	3.12565	0.077069	0.397369	0
ENSG00000180098	54952	TRNAU1AP	0.0873004	0.032582	0.856756	0.947173	0
ENSG00000197989	85028	SNHG12	0.495651	0.952878	0.328988	0.723941	0
ENSG00000120656	6883	TAF12	0.228651	0.2364	0.626818	0.854681	0
ENSG00000188060	115273	RAB42	-0.0468025	0.00793442	0.929022	0.976135	0
ENSG00000162419	10691	GMEB1	0.151563	0.104497	0.746499	0.904086	0
ENSG00000198492	51441	YTHDF2	0.428321	0.906556	0.34103	0.731298	0
ENSG00000159023	2035	EPB41	-0.53958	1.30248	0.253761	0.675976	0
ENSG00000253304	399474	TMEM200B	0.420398	0.837861	0.360009	0.744171	0
ENSG00000116350	6429	SRSF4	0.30921	0.472469	0.491854	0.806977	0
ENSG00000116353	51102	MECR	-0.0383597	0.00642529	0.936112	0.978281	0
ENSG00000060656	10076	PTPRU	-1.2706	7.22036	0.00720811	0.0725469	0
ENSG00000186056	100129196	MATN1-AS1	-1.31168	5.119	0.0236652	0.182043	0
ENSG00000223382	105378622	LINC01778	-0.271348	0.169931	0.680173	0.876996	0
ENSG00000162512	9672	SDC3	-0.0872469	0.0384095	0.844623	0.94302	0
ENSG00000134644	9698	PUM1	0.379173	0.713114	0.398412	0.764234	0
ENSG00000060688	9410	SNRNP40	0.282019	0.376358	0.539559	0.825421	0
ENSG00000121766	51538	ZCCHC17	0.217719	0.219785	0.639204	0.860458	0
ENSG00000142910	64129	TINAGL1	0.12743	0.0264885	0.870713	0.952516	0
ENSG00000162517	553115	PEF1	0.53437	1.38447	0.239342	0.66681	0
ENSG00000084636	1307	COL16A1	-1.02049	5.22478	0.0222672	0.173667	0
ENSG00000121753	576	ADGRB2	-0.613135	1.80177	0.179499	0.604777	0
ENSG00000134668	90853	SPOCD1	-0.262237	0.330605	0.565303	0.834476	0
ENSG00000184007	8073	PTP4A2	0.282743	0.407572	0.523204	0.820458	0
ENSG00000121774	10657	KHDRBS1	0.373595	0.702745	0.401863	0.765715	0
ENSG00000121775	55116	TMEM39B	0.0594207	0.0159449	0.899516	0.965692	0
ENSG00000025800	23633	KPNA6	0.368717	0.672295	0.412253	0.770762	0
ENSG00000084652	200081	TXLNA	0.402122	0.800889	0.370828	0.750859	0
ENSG00000160050	79140	CCDC28B	-0.608782	1.40273	0.236266	0.665351	0
ENSG00000160051	55721	IQCC	0.188576	0.134247	0.714069	0.890021	0
ENSG00000160055	56063	TMEM234	-0.618981	1.47115	0.225164	0.655196	0
ENSG00000084623	8668	EIF3I	0.39781	0.791588	0.37362	0.751855	0
ENSG00000220785	339483	MTMR9LP	-0.874759	2.85764	0.090941	0.437838	0
ENSG00000183615	84734	FAM167B	-0.739249	1.60991	0.204504	0.631026	0
ENSG00000116478	3065	HDAC1	0.323719	0.518565	0.471455	0.797376	0
ENSG00000175130	65108	MARCKSL1	0.37863	0.698698	0.403222	0.766155	0
ENSG00000225828	100128071	FAM229A	-0.141286	0.0706403	0.790407	0.920516	0
ENSG00000160058	55108	BSDC1	0.293646	0.422038	0.515922	0.81767	0
ENSG00000160062	653121	ZBTB8A	0.0964388	0.0402348	0.841022	0.941512	0
ENSG00000176261	339487	ZBTB8OS	0.653372	1.84555	0.174302	0.598415	0
ENSG00000162521	5928	RBBP4	0.350058	0.609171	0.4351	0.781361	0
ENSG00000162520	81493	SYNC	0.280294	0.39018	0.532205	0.823054	0
ENSG00000162522	57648	KIAA1522	-0.0766439	0.0288976	0.865016	0.950448	0
ENSG00000134684	8565	YARS1	0.489619	1.19596	0.27413	0.68843	0
ENSG00000116497	64766	S100PBP	0.084478	0.0335816	0.8546	0.946127	0
ENSG00000116514	127544	RNF19B	0.793285	2.64361	0.103967	0.469856	0
ENSG00000004455	204	AK2	0.520696	1.33762	0.247455	0.672989	0
ENSG00000142920	113451	AZIN2	-0.241329	0.224666	0.635507	0.858126	0
ENSG00000278997	NA		0.253886	0.236619	0.626658	0.854681	0
ENSG00000116525	55223	TRIM62	0.577948	1.5818	0.208502	0.635154	0
ENSG00000160094	149076	ZNF362	-0.105676	0.0542814	0.815774	0.931138	0
ENSG00000134686	1912	PHC2	0.0645215	0.0207141	0.885561	0.960157	0
ENSG00000121903	7579	ZSCAN20	0.434834	0.742816	0.38876	0.758726	0
ENSG00000163866	113444	SMIM12	0.643045	1.90115	0.167949	0.589252	0
ENSG00000284773	NA		-0.0800687	0.0216297	0.883076	0.959366	0
ENSG00000241014	653160	GPR199P	-0.571032	0.834193	0.361063	0.745	0
ENSG00000243749	100506144	TMEM35B	-0.321665	0.35158	0.55322	0.830031	0
ENSG00000163867	9204	ZMYM6	0.413247	0.699957	0.402798	0.765915	0
ENSG00000197056	79830	ZMYM1	0.264825	0.301481	0.582956	0.840651	0
ENSG00000116560	6421	SFPQ	0.220759	0.246698	0.61941	0.851754	0
ENSG00000146463	9202	ZMYM4	0.174155	0.150257	0.69829	0.884587	0
ENSG00000142687	79932	KIAA0319L	0.104745	0.052236	0.819217	0.932294	0
ENSG00000020129	23154	NCDN	0.374209	0.673805	0.411728	0.770308	0
ENSG00000116819	339488	TFAP2E	0.0090367	0.000233022	0.987821	0.996505	0
ENSG00000126067	5690	PSMB2	0.409298	0.828388	0.362739	0.745647	0
ENSG00000142686	127703	C1orf216	0.655538	2.01381	0.155873	0.569315	0
ENSG00000092853	63967	CLSPN	1.01757	4.432	0.0352711	0.240403	0
ENSG00000134698	192670	AGO4	0.0243456	0.00264608	0.958975	0.987358	0
ENSG00000092847	26523	AGO1	0.243114	0.285986	0.592804	0.845152	0
ENSG00000126070	192669	AGO3	0.0464798	0.0101766	0.919646	0.973295	0
ENSG00000116863	54936	ADPRS	0.296029	0.407603	0.523189	0.820458	0
ENSG00000054116	27095	TRAPPC3	0.281277	0.381476	0.536815	0.824703	0
ENSG00000116871	55700	MAP7D1	0.694954	2.44171	0.118147	0.50003	0
ENSG00000054118	9967	THRAP3	0.43764	0.959132	0.327406	0.722258	0
ENSG00000214193	79729	SH3D21	-0.3544	0.535072	0.464482	0.794905	0
ENSG00000142694	55194	EVA1B	-0.0811942	0.0325631	0.856797	0.947173	0
ENSG00000286379	NA		0.189202	0.0916981	0.762029	0.910142	0
ENSG00000196182	83931	STK40	0.664379	2.11634	0.145734	0.553548	0
ENSG00000181817	84967	LSM10	0.11645	0.0608207	0.805204	0.926329	0
ENSG00000116885	127700	OSCP1	-0.699148	1.80462	0.179155	0.604293	0
ENSG00000116898	64960	MRPS15	0.542944	1.40352	0.236134	0.665351	0
ENSG00000233621	728431	ZC3H12A-DT	0.809562	2.44323	0.118033	0.49994	0
ENSG00000163874	80149	ZC3H12A	0.728771	2.28225	0.130862	0.526741	0
ENSG00000163875	64769	MEAF6	0.436379	0.9215	0.337082	0.729463	0
ENSG00000163877	79753	SNIP1	0.3974	0.72981	0.392945	0.761663	0
ENSG00000134697	29889	GNL2	0.308491	0.468068	0.493877	0.807729	0
ENSG00000116922	54955	C1orf109	0.0630302	0.0175817	0.894513	0.963813	0
ENSG00000134690	55143	CDCA8	0.972017	4.2451	0.0393638	0.259419	0
ENSG00000185090	149175	MANEAL	0.469092	1.03084	0.309962	0.711022	0
ENSG00000196449	79693	YRDC	0.408057	0.70148	0.402287	0.765771	0
ENSG00000197982	127687	C1orf122	0.200338	0.187599	0.664923	0.870049	0
ENSG00000188786	4520	MTF1	0.346107	0.562186	0.453381	0.79079	0
ENSG00000204084	3633	INPP5B	0.127025	0.0735961	0.786171	0.91902	0
ENSG00000183431	10946	SF3A3	0.515932	1.31171	0.252085	0.674414	0
ENSG00000183386	2275	FHL3	0.982225	4.59271	0.0321081	0.223988	0
ENSG00000183520	51118	UTP11	0.546095	1.41613	0.234041	0.664029	0
ENSG00000116954	64121	RRAGC	0.934	3.91537	0.0478464	0.294012	0
ENSG00000228436	105378663	LOC105378663	-0.0639219	0.0112121	0.915672	0.971697	0
ENSG00000214114	26292	MYCBP	0.074163	0.0232225	0.87888	0.957439	0
ENSG00000174574	79647	AKIRIN1	0.653758	2.08653	0.148604	0.556592	0
ENSG00000168653	4725	NDUFS5	0.222829	0.242653	0.622296	0.852788	0
ENSG00000127603	23499	MACF1	0.360461	0.664869	0.414846	0.77221	0
ENSG00000243970	728448	PPIEL	-1.5672	7.05404	0.00790867	0.0782461	0
ENSG00000090621	8761	PABPC4	0.28821	0.41988	0.516997	0.81795	0
ENSG00000084072	10450	PPIE	0.173081	0.142145	0.706157	0.886639	0
ENSG00000043514	54802	TRIT1	0.438491	0.87066	0.350773	0.737231	0
ENSG00000168389	84879	MFSD2A	0.37129	0.420615	0.51663	0.817671	0
ENSG00000131236	10487	CAP1	0.952983	4.60601	0.0318602	0.222752	0
ENSG00000131238	5538	PPT1	0.647043	2.06313	0.1509	0.561409	0
ENSG00000117000	6018	RLF	0.48188	1.11271	0.291494	0.698051	0
ENSG00000259943	NA	ZMPSTE24-DT	1.04053	3.80265	0.0511716	0.30632	0
ENSG00000084073	10269	ZMPSTE24	0.607839	1.8092	0.178605	0.603984	0
ENSG00000084070	64744	SMAP2	0.486576	1.11619	0.29074	0.697657	0
ENSG00000187801	65243	ZFP69B	0.441354	0.76304	0.382379	0.754744	0
ENSG00000260920	NA		0.0234552	0.00215074	0.96301	0.989007	0
ENSG00000187815	339559	ZFP69	-0.18107	0.126338	0.72226	0.893882	0
ENSG00000238287	NA	EXO5-DT	0.558491	0.761874	0.382743	0.754744	0
ENSG00000164002	64789	EXO5	1.02166	4.07955	0.0434052	0.276202	0
ENSG00000117010	127396	ZNF684	0.426113	0.675378	0.411183	0.770308	0
ENSG00000117016	9783	RIMS3	-0.408069	0.479588	0.488609	0.805263	0
ENSG00000066136	4802	NFYC	0.0320938	0.00473707	0.945128	0.981963	0
ENSG00000179862	163732	CITED4	-0.741827	2.01121	0.156141	0.569632	0
ENSG00000171793	1503	CTPS1	0.569513	1.57839	0.208992	0.636157	0
ENSG00000281207	100507178	SLFNL1-AS1	1.2795	3.61031	0.0574225	0.329436	0
ENSG00000010803	22955	SCMH1	-0.557725	1.46061	0.226833	0.657498	0
ENSG00000127124	59269	HIVEP3	0.580316	1.38615	0.239057	0.666537	0
ENSG00000198815	22887	FOXJ3	0.212319	0.221095	0.638207	0.859558	0
ENSG00000127125	79717	PPCS	0.419418	0.758038	0.383943	0.75504	0
ENSG00000186409	728621	CCDC30	-0.0875836	0.0215727	0.88323	0.959366	0
ENSG00000236876	NA	TMSB4XP1	-0.131564	0.0336742	0.854402	0.946121	0
ENSG00000171960	10465	PPIH	0.339625	0.495701	0.481395	0.801507	0
ENSG00000065978	4904	YBX1	0.897597	4.10393	0.0427836	0.274743	0
ENSG00000117385	64175	P3H1	-0.0920884	0.0425702	0.836537	0.93903	0
ENSG00000164008	79078	C1orf50	-0.316052	0.377498	0.538945	0.825343	0
ENSG00000177868	374969	SVBP	0.0629352	0.0167188	0.897119	0.964688	0
ENSG00000164010	114625	ERMAP	-0.724266	2.37183	0.123542	0.512625	0
ENSG00000228192	NA	ZNF691-DT	-1.17307	3.21556	0.0729412	0.384659	0
ENSG00000164011	51058	ZNF691	-0.130237	0.0652642	0.798361	0.923978	0
ENSG00000117394	6513	SLC2A1	0.407586	0.83868	0.359775	0.744028	0
ENSG00000227533	440584	SLC2A1-DT	-0.143654	0.0722326	0.788113	0.919855	0
ENSG00000117395	10969	EBNA1BP2	0.639179	1.98251	0.159126	0.574021	0
ENSG00000243710	149465	CFAP57	1.16603	3.84577	0.0498718	0.301976	0
ENSG00000117399	991	CDC20	0.819054	3.19209	0.0739952	0.387926	0
ENSG00000066322	64834	ELOVL1	0.534874	1.39642	0.237324	0.665351	0
ENSG00000159479	112950	MED8	0.419351	0.840869	0.359148	0.743558	0
ENSG00000198198	23334	SZT2	0.486872	1.14587	0.284415	0.692114	0
ENSG00000178922	81888	HYI	-0.625302	1.61425	0.203896	0.630789	0
ENSG00000142949	5792	PTPRF	-0.521705	1.34166	0.246742	0.672355	0
ENSG00000066135	9682	KDM4A	0.407255	0.780202	0.377079	0.752908	0
ENSG00000126091	6487	ST3GAL3	-0.00943193	0.000328499	0.98554	0.995994	0
ENSG00000117407	9048	ARTN	0.995588	2.32079	0.127655	0.521712	0
ENSG00000117408	9670	IPO13	-0.233261	0.245246	0.620443	0.852438	0
ENSG00000132768	1802	DPH2	-0.253669	0.27727	0.598496	0.847402	0
ENSG00000117410	533	ATP6V0B	0.351915	0.593908	0.440912	0.784183	0
ENSG00000117411	8704	B4GALT2	-0.241275	0.288707	0.59105	0.844979	0
ENSG00000159214	149473	CCDC24	-0.0748047	0.0202247	0.886911	0.96088	0
ENSG00000196517	6536	SLC6A9	1.16619	6.35856	0.0116816	0.106345	0
ENSG00000230615	107984948	LOC107984948	-0.448914	0.705643	0.400894	0.765255	0
ENSG00000171872	128209	KLF17	0.412646	0.437963	0.508107	0.813939	0
ENSG00000178028	55929	DMAP1	0.0439072	0.00869118	0.925724	0.974801	0
ENSG00000117419	79033	ERI3	0.106249	0.0545564	0.815316	0.931074	0
ENSG00000187147	55182	RNF220	0.113636	0.0633075	0.801343	0.924798	0
ENSG00000126106	79639	TMEM53	0.69989	1.87482	0.170924	0.593453	0
ENSG00000198520	339541	ARMH1	0.155679	0.0567862	0.81165	0.929202	0
ENSG00000142945	11004	KIF2C	1.03714	5.01148	0.0251797	0.189522	0
ENSG00000225721	NA		-0.0721974	0.0204043	0.886414	0.960673	0
ENSG00000142937	6202	RPS8	0.252828	0.332095	0.564428	0.834201	0
ENSG00000142959	266675	BEST4	-2.00128	4.39968	0.0359456	0.243418	0
ENSG00000173846	1263	PLK3	0.78465	2.7703	0.0960283	0.452133	0
ENSG00000222009	149478	BTBD19	-0.79954	2.53879	0.11108	0.484008	0
ENSG00000117425	8643	PTCH2	-0.170419	0.105072	0.745826	0.903845	0
ENSG00000226499	NA		0.288831	0.204784	0.650887	0.865216	0
ENSG00000070785	8891	EIF2B3	0.418558	0.807288	0.368923	0.749679	0
ENSG00000126107	79654	HECTD3	0.451719	0.982578	0.321563	0.719537	0
ENSG00000126088	7389	UROD	0.398698	0.777693	0.377848	0.753346	0
ENSG00000281912	400752	LINC01144	1.1845	2.86929	0.0902846	0.435938	0
ENSG00000132781	4595	MUTYH	-0.16389	0.0751003	0.784051	0.917786	0
ENSG00000132773	114034	TOE1	-0.0112873	0.000537288	0.981507	0.995145	0
ENSG00000070759	10420	TESK2	-0.307404	0.327162	0.567335	0.834713	0
ENSG00000280670	126661	CCDC163	0.53642	0.943366	0.331414	0.725584	0
ENSG00000132763	25974	MMACHC	0.0351807	0.00497454	0.943772	0.98126	0
ENSG00000117450	5052	PRDX1	0.7276	2.67617	0.101861	0.467299	0
ENSG00000117448	10327	AKR1A1	0.59933	1.73727	0.187485	0.615289	0
ENSG00000132780	4678	NASP	0.587173	1.68088	0.194808	0.62084	0
ENSG00000159592	60313	GPBP1L1	0.469935	1.0867	0.297203	0.701998	0
ENSG00000234329	100270896	RPL7AP16	1.25297	3.46819	0.0625596	0.348981	0
ENSG00000159596	51249	TMEM69	0.368906	0.612622	0.433802	0.781261	0
ENSG00000197429	3652	IPP	0.210724	0.193818	0.659758	0.868173	0
ENSG00000230896	NA		0.124116	0.053001	0.817921	0.931548	0
ENSG00000086015	23139	MAST2	0.241937	0.286316	0.592591	0.845133	0
ENSG00000117461	8503	PIK3R3	0.336352	0.449678	0.502488	0.811187	0
ENSG00000085998	55624	POMGNT1	0.121279	0.0718336	0.788686	0.919934	0
ENSG00000085999	8438	RAD54L	0.28152	0.301517	0.582933	0.840651	0
ENSG00000132128	10489	LRRC41	0.176558	0.155212	0.693604	0.882631	0
ENSG00000173660	7388	UQCRH	0.358553	0.6272	0.428384	0.778494	0
ENSG00000117481	387338	NSUN4	0.378576	0.644497	0.422087	0.775321	0
ENSG00000117480	2166	FAAH	0.706199	1.51735	0.21802	0.646092	0
ENSG00000079277	8569	MKNK1	0.386286	0.685525	0.407691	0.768794	0
ENSG00000142961	148932	MOB3C	-0.00799706	0.000287126	0.986481	0.996087	0
ENSG00000123472	64756	ATPAF1	0.239772	0.275617	0.599589	0.848046	0
ENSG00000159658	9813	EFCAB14	0.374384	0.698656	0.403236	0.766155	0
ENSG00000123473	6491	STIL	1.06997	4.948	0.0261208	0.194743	0
ENSG00000162368	51727	CMPK1	0.640613	2.04485	0.152722	0.564365	0
ENSG00000225762	NA	LINC01389	-0.204715	0.103579	0.747576	0.904558	0
ENSG00000237424	84793	FOXD2-AS1	1.11637	4.52402	0.0334222	0.2307	0
ENSG00000186564	2306	FOXD2	0.495172	0.792577	0.373322	0.751855	0
ENSG00000185104	11124	FAF1	0.492875	1.17445	0.278488	0.689037	0
ENSG00000123080	1031	CDKN2C	-0.305203	0.449036	0.502793	0.811187	0
ENSG00000123091	26994	RNF11	0.222953	0.248004	0.618484	0.851754	0
ENSG00000085831	22996	TTC39A	-1.3554	1.57366	0.209676	0.637251	0
ENSG00000085832	2060	EPS15	0.341119	0.573193	0.448993	0.788734	0
ENSG00000117859	114883	OSBPL9	0.0552396	0.0150945	0.902218	0.967192	0
ENSG00000078618	4898	NRDC	0.478867	1.14472	0.284657	0.692114	0
ENSG00000266993	NA		0.736471	1.61449	0.203862	0.630789	0
ENSG00000169213	5865	RAB3B	0.0931637	0.0443026	0.833292	0.937916	0
ENSG00000117862	51060	TXNDC12	0.214672	0.195617	0.658283	0.867913	0
ENSG00000198841	112970	KTI12	0.115829	0.0535257	0.817038	0.931548	0
ENSG00000134717	91408	BTF3L4	0.604385	1.7717	0.183171	0.610285	0
ENSG00000157077	9372	ZFYVE9	0.0372374	0.00662781	0.935115	0.978236	0
ENSG00000154222	200014	CC2D1B	0.268136	0.331908	0.564538	0.834201	0
ENSG00000085840	4998	ORC1	1.09924	4.661	0.0308552	0.218346	0
ENSG00000134748	84950	PRPF38A	-0.200381	0.188221	0.664402	0.870047	0
ENSG00000134744	23318	TUT4	0.237538	0.270225	0.603181	0.849176	0
ENSG00000116157	2882	GPX7	-0.814047	2.50502	0.113484	0.489368	0
ENSG00000162377	65260	COA7	0.678258	2.14816	0.142741	0.547166	0
ENSG00000162378	79699	ZYG11B	0.279277	0.383726	0.535616	0.824564	0
ENSG00000228929	729236	RPS13P2	0.478319	0.78502	0.37561	0.751855	0
ENSG00000121310	55268	ECHDC2	-0.506848	1.08432	0.297734	0.702829	0
ENSG00000116171	6342	SCP2	0.818469	3.30651	0.0690059	0.370378	0
ENSG00000236360	NA	RRAS2P1	-0.231495	0.14254	0.705769	0.886639	0
ENSG00000174348	127435	PODN	-0.287116	0.408578	0.522692	0.820458	0
ENSG00000157184	1376	CPT2	0.265083	0.301462	0.582967	0.840651	0
ENSG00000236723	NA		0.210933	0.0996383	0.752264	0.906416	0
ENSG00000162384	54987	CZIB	0.27438	0.359541	0.548762	0.828616	0
ENSG00000162385	4116	MAGOH	0.253767	0.294861	0.587122	0.843239	0
ENSG00000226754	100507564	MAGOH-DT	0.982199	2.767	0.0962264	0.452538	0
ENSG00000157193	7804	LRP8	1.30812	6.79078	0.00916296	0.0883152	0
ENSG00000174332	148979	GLIS1	-0.7099	2.31814	0.127873	0.521721	0
ENSG00000058804	55706	NDC1	0.78054	2.85734	0.0909577	0.437838	0
ENSG00000058799	54432	YIPF1	0.593049	1.55452	0.21247	0.64045	0
ENSG00000081870	51668	HSPB11	0.512515	1.16552	0.280324	0.690613	0
ENSG00000116212	115353	LRRC42	0.247048	0.292034	0.58892	0.843865	0
ENSG00000116209	9528	TMEM59	0.108744	0.0601009	0.806336	0.926483	0
ENSG00000116205	127428	TCEANC2	0.178538	0.132594	0.715758	0.890579	0
ENSG00000215883	606495	CYB5RL	0.679405	1.8904	0.169157	0.590809	0
ENSG00000116221	51253	MRPL37	0.525419	1.34382	0.246361	0.671781	0
ENSG00000157216	23648	SSBP3	0.0557496	0.0154012	0.901235	0.966685	0
ENSG00000162390	26027	ACOT11	0.406555	0.538081	0.463229	0.794396	0
ENSG00000243725	7268	TTC4	0.237211	0.202625	0.65261	0.865982	0
ENSG00000162396	25973	PARS2	0.37432	0.547293	0.459426	0.793089	0
ENSG00000162402	23358	USP24	0.284565	0.39928	0.527461	0.82151	0
ENSG00000162409	5563	PRKAA2	-0.778177	2.31336	0.128266	0.522735	0
ENSG00000162600	115209	OMA1	-0.834272	2.66773	0.102402	0.468144	0
ENSG00000162601	114803	MYSM1	0.442139	0.905167	0.3414	0.731674	0
ENSG00000177606	3725	JUN	-0.324416	0.539755	0.462534	0.794396	0
ENSG00000234807	101926907	LOC101926907	0.388373	0.406606	0.523697	0.820528	0
ENSG00000232453	105378753	LINC02777	1.54342	7.32875	0.00678603	0.0691965	0
ENSG00000224609	729467	HSD52	0.764547	1.70149	0.192094	0.619602	0
ENSG00000172456	55277	FGGY	0.54413	1.14453	0.284698	0.692114	0
ENSG00000162599	4774	NFIA	-0.157628	0.11824	0.730951	0.897497	0
ENSG00000162604	83941	TM2D1	0.145781	0.098945	0.753099	0.906416	0
ENSG00000132849	10207	PATJ	0.192184	0.163726	0.685749	0.879884	0
ENSG00000162607	7398	USP1	0.361202	0.637484	0.424623	0.776084	0
ENSG00000116641	85440	DOCK7	0.792905	3.10799	0.0779091	0.39952	0
ENSG00000125703	84938	ATG4C	0.698847	2.04064	0.153145	0.564647	0
ENSG00000088035	29929	ALG6	0.969863	3.69763	0.0544899	0.319303	0
ENSG00000142856	23421	ITGB3BP	0.25952	0.277552	0.59831	0.847402	0
ENSG00000203965	84455	EFCAB7	0.448795	0.794205	0.372832	0.751855	0
ENSG00000079739	5236	PGM1	-0.159122	0.12318	0.725611	0.895318	0
ENSG00000162437	55225	RAVER2	-0.386173	0.601041	0.438181	0.783242	0
ENSG00000162434	3716	JAK1	0.149337	0.113516	0.736177	0.899433	0
ENSG00000213625	54741	LEPROT	0.0374562	0.00705549	0.933059	0.977588	0
ENSG00000116678	3953	LEPR	0.093411	0.0388019	0.843842	0.942518	0
ENSG00000184588	5142	PDE4B	-0.22785	0.255154	0.613469	0.851459	0
ENSG00000118473	84251	SGIP1	0.510403	1.25669	0.262279	0.682081	0
ENSG00000152763	79819	DNAI4	-0.874642	2.67429	0.101981	0.467577	0
ENSG00000198160	57708	MIER1	0.444809	0.959664	0.327272	0.722258	0
ENSG00000116704	23169	SLC35D1	0.184382	0.162026	0.687298	0.879884	0
ENSG00000142864	26135	SERBP1	0.465022	1.10029	0.294203	0.700274	0
ENSG00000116717	1647	GADD45A	0.594827	1.70349	0.191832	0.619602	0
ENSG00000172380	55970	GNG12	0.472966	1.14637	0.28431	0.692114	0
ENSG00000232284	100289178	GNG12-AS1	-0.88581	1.66698	0.196663	0.622894	0
ENSG00000162595	9077	DIRAS3	-0.102262	0.0312128	0.859766	0.948018	0
ENSG00000116729	79971	WLS	0.766702	2.95016	0.0858689	0.423274	0
ENSG00000024526	55635	DEPDC1	0.823569	3.08229	0.0791491	0.403335	0
ENSG00000066557	55631	LRRC40	0.8572	3.34263	0.0675067	0.365056	0
ENSG00000116754	9295	SRSF11	0.314796	0.490184	0.483845	0.803056	0
ENSG00000118454	81573	ANKRD13C	0.030296	0.00437309	0.947275	0.982892	0
ENSG00000197568	11147	HHLA3	-1.04285	4.12309	0.0423019	0.272949	0
ENSG00000116761	1491	CTH	0.18663	0.120757	0.728215	0.896645	0
ENSG00000132485	9406	ZRANB2	0.388712	0.736007	0.390943	0.760147	0
ENSG00000229956	NA	ZRANB2-DT	0.494151	0.684602	0.408007	0.768849	0
ENSG00000172260	257194	NEGR1	-0.209087	0.195579	0.658313	0.867913	0
ENSG00000162620	127255	LRRIQ3	0.669763	1.16439	0.280557	0.690749	0
ENSG00000254685	8790	FPGT	0.561036	1.31713	0.251107	0.674255	0
ENSG00000116791	1429	CRYZ	0.529694	1.3005	0.254121	0.675976	0
ENSG00000162623	127253	TYW3	0.302816	0.429543	0.512213	0.816021	0
ENSG00000117054	34	ACADM	0.972037	4.41641	0.0355949	0.241667	0
ENSG00000137955	5876	RABGGTB	0.408183	0.788151	0.37466	0.751855	0
ENSG00000184005	256435	ST6GALNAC3	0.300385	0.222817	0.636902	0.859272	0
ENSG00000226415	NA	TPI1P1	0.018986	0.00117184	0.972692	0.991471	0
ENSG00000142892	10026	PIGK	0.382557	0.709124	0.399735	0.764781	0
ENSG00000226084	645441	RPL17P6	0.158028	0.0808234	0.776185	0.914421	0
ENSG00000036549	26009	ZZZ3	0.180707	0.158682	0.690373	0.880799	0
ENSG00000077254	23032	USP33	0.353538	0.611942	0.434058	0.781301	0
ENSG00000180488	374986	MIGA1	0.670275	2.05377	0.151829	0.563442	0
ENSG00000219201	NA		0.0753916	0.0162924	0.898433	0.965081	0
ENSG00000235927	374987	NEXN-AS1	-0.26091	0.18747	0.665031	0.870049	0
ENSG00000162614	91624	NEXN	0.856159	3.58211	0.0584049	0.33434	0
ENSG00000162613	8880	FUBP1	0.0450577	0.0100339	0.92021	0.973557	0
ENSG00000162616	11080	DNAJB4	0.742605	2.64935	0.103592	0.469767	0
ENSG00000137965	10561	IFI44	0.949728	4.09487	0.0430134	0.275183	0
ENSG00000162618	64123	ADGRL4	0.375337	0.568731	0.450763	0.789664	0
ENSG00000117114	23266	ADGRL2	-0.119891	0.0719828	0.788471	0.919934	0
ENSG00000137941	79739	TTLL7	0.503561	1.12543	0.288752	0.695313	0
ENSG00000271576	NA	PRKACB-DT	-1.09214	2.43723	0.118485	0.50091	0
ENSG00000142875	5567	PRKACB	0.180306	0.160437	0.688754	0.879926	0
ENSG00000203943	148418	SAMD13	-1.48945	4.58185	0.0323123	0.225113	0
ENSG00000117133	80135	RPF1	0.553648	1.43768	0.230515	0.660998	0
ENSG00000174021	2787	GNG5	0.319441	0.473737	0.491273	0.806683	0
ENSG00000117151	1486	CTBS	-0.0781668	0.0283444	0.866302	0.950876	0
ENSG00000117155	117178	SSX2IP	0.939875	4.11441	0.0425194	0.273699	0
ENSG00000153898	255231	MCOLN2	0.877838	2.84406	0.0917121	0.440257	0
ENSG00000162643	126820	DNAI3	-1.55469	7.54412	0.00602061	0.0633513	0
ENSG00000280099	NA		1.22699	5.56432	0.0183301	0.149019	0
ENSG00000162642	148423	C1orf52	0.562428	1.45253	0.228122	0.6586	0
ENSG00000142867	8915	BCL10	0.467369	1.036	0.308754	0.709924	0
ENSG00000223653	NA	BCL10-AS1	0.739377	1.28492	0.256986	0.67823	0
ENSG00000153904	23576	DDAH1	0.341217	0.585282	0.444249	0.784923	0
ENSG00000273264	NA		1.87115	6.4595	0.0110361	0.101764	0
ENSG00000142871	3491	CCN1	-0.292063	0.443508	0.505434	0.812888	0
ENSG00000117174	54680	ZNHIT6	0.319275	0.491297	0.48335	0.802488	0
ENSG00000122417	57489	ODF2L	0.12928	0.0723359	0.787966	0.919751	0
ENSG00000137975	9635	CLCA2	0.113368	0.0253631	0.873466	0.953838	0
ENSG00000261737			-0.553182	0.707941	0.400128	0.764907	0
ENSG00000097033	51100	SH3GLB1	0.344333	0.595447	0.440321	0.784183	0
ENSG00000183291	9403	SELENOF	0.18869	0.177946	0.673145	0.873988	0
ENSG00000153936	9653	HS2ST1	0.410304	0.816042	0.36634	0.748233	0
ENSG00000143013	8543	LMO4	0.129161	0.0781658	0.779799	0.91576	0
ENSG00000065243	5586	PKN2	0.378959	0.700361	0.402662	0.765896	0
ENSG00000137947	2959	GTF2B	0.62822	1.8322	0.175868	0.600124	0
ENSG00000137944	56267	KYAT3	-0.0626633	0.018442	0.891978	0.962527	0
ENSG00000213516	494115	RBMXL1	0.948317	4.04627	0.0442689	0.279564	0
ENSG00000117226	2635	GBP3	0.392937	0.759675	0.38343	0.754744	0
ENSG00000162654	115361	GBP4	0.294422	0.395465	0.52944	0.822175	0
ENSG00000154451	115362	GBP5	0.0471002	0.00109522	0.9736	0.991756	0
ENSG00000225492	400759	GBP1P1	-0.903697	2.52077	0.112356	0.486503	0
ENSG00000197147	23507	LRRC8B	1.32736	7.17259	0.00740259	0.0740306	0
ENSG00000231999	400761	LRRC8C-DT	0.312483	0.320459	0.571332	0.836138	0
ENSG00000171488	84230	LRRC8C	0.435543	0.911824	0.339631	0.730765	0
ENSG00000171492	55144	LRRC8D	0.954053	4.40074	0.0359234	0.243373	0
ENSG00000228175	NA	GEMIN8P4	1.48018	4.86442	0.0274159	0.20191	0
ENSG00000162664	284695	ZNF326	0.487498	1.10566	0.293028	0.699382	0
ENSG00000122482	84146	ZNF644	0.475029	1.08499	0.297584	0.70258	0
ENSG00000097046	8317	CDC7	1.16673	5.18358	0.0228013	0.177129	0
ENSG00000069702	7049	TGFBR3	-0.63629	1.91578	0.166322	0.587035	0
ENSG00000189195	284697	BTBD8	-0.504397	0.949827	0.329763	0.72437	0
ENSG00000174842	11146	GLMN	0.751189	2.28721	0.130444	0.526493	0
ENSG00000122484	79871	RPAP2	0.497899	1.14667	0.284246	0.692114	0
ENSG00000067208	7813	EVI5	0.446155	0.960703	0.32701	0.722258	0
ENSG00000122406	6125	RPL5	0.280615	0.407315	0.523336	0.82047	0
ENSG00000154511	388650	DIPK1A	0.182826	0.162203	0.687137	0.879884	0
ENSG00000143033	22823	MTF2	0.0630214	0.0171547	0.895794	0.964395	0
ENSG00000117500	50999	TMED5	0.124256	0.0754204	0.783602	0.917733	0
ENSG00000122483	343099	CCDC18	0.202382	0.16037	0.688816	0.879926	0
ENSG00000223745	NA	CCDC18-AS1	-0.569537	1.178	0.277764	0.689037	0
ENSG00000117505	1810	DR1	0.25589	0.323426	0.569556	0.83557	0
ENSG00000137936	8412	BCAR3	0.444018	0.9484	0.330127	0.724805	0
ENSG00000260464	NA		1.03963	2.72176	0.0989886	0.458806	0
ENSG00000067334	30836	DNTTIP2	0.311984	0.474875	0.490753	0.806102	0
ENSG00000023909	2730	GCLM	0.233991	0.256894	0.612262	0.851459	0
ENSG00000198691	24	ABCA4	-1.25782	3.86368	0.0493419	0.300502	0
ENSG00000137962	9411	ARHGAP29	-0.264805	0.350741	0.553694	0.830031	0
ENSG00000117528	5825	ABCD3	0.687629	2.26929	0.13196	0.529221	0
ENSG00000224081	101928079	SLC44A3-AS1	0.356692	0.318632	0.572431	0.83654	0
ENSG00000143036	126969	SLC44A3	0.385689	0.44631	0.504093	0.811989	0
ENSG00000117519	1266	CNN3	0.772918	3.01829	0.0823305	0.412991	0
ENSG00000235501	NA	CNN3-DT	0.744103	2.16872	0.140843	0.544375	0
ENSG00000172339	199857	ALG14	0.143289	0.085641	0.769794	0.912818	0
ENSG00000152078	148534	TLCD4	-0.392368	0.571928	0.449494	0.789085	0
ENSG00000122481	25950	RWDD3	0.247184	0.221343	0.638018	0.859558	0
ENSG00000228502	NA	EEF1A1P11	0.114303	0.0412358	0.839083	0.940479	0
ENSG00000137970	653702	RPL7P9	0.201137	0.160468	0.688726	0.879926	0
ENSG00000117569	58155	PTBP2	0.240648	0.239484	0.624579	0.853469	0
ENSG00000188641	1806	DPYD	-0.0829571	0.0337932	0.854147	0.946042	0
ENSG00000228057	100420341	SEC63P1	0.575596	0.943849	0.33129	0.725584	0
ENSG00000225206	400765	MIR137HG	1.57433	4.25262	0.0391897	0.258488	0
ENSG00000162627	51375	SNX7	0.290905	0.407325	0.523331	0.82047	0
ENSG00000156869	391059	FRRS1	-0.340082	0.461596	0.496879	0.808544	0
ENSG00000162688	178	AGL	-0.1766	0.1444	0.703946	0.88631	0
ENSG00000117620	23443	SLC35A3	0.0824014	0.0312778	0.859622	0.948018	0
ENSG00000156875	64645	MFSD14A	0.373434	0.544835	0.460436	0.793505	0
ENSG00000156876	163786	SASS6	0.522018	1.08838	0.296831	0.701872	0
ENSG00000122435	54482	TRMT13	0.10214	0.0428211	0.836062	0.938966	0
ENSG00000137992	1629	DBT	0.338989	0.539764	0.462531	0.794396	0
ENSG00000224616	NA	RTCA-AS1	-0.0679421	0.0165928	0.897506	0.964688	0
ENSG00000137996	8634	RTCA	0.483515	1.08015	0.298664	0.70323	0
ENSG00000079335	8556	CDC14A	0.0826124	0.0255883	0.87291	0.953593	0
ENSG00000162694	2135	EXTL2	0.0774918	0.0285457	0.865832	0.950698	0
ENSG00000162695	148867	SLC30A7	0.160622	0.125219	0.723442	0.894222	0
ENSG00000117543	51611	DPH5	-0.368566	0.591981	0.441654	0.784183	0
ENSG00000233184	102606465	DPH5-DT	-0.639231	1.47739	0.224184	0.654413	0
ENSG00000170989	1901	S1PR1	0.409585	0.661541	0.416016	0.772519	0
ENSG00000183298	730029	RPSAP19	0.575104	1.25501	0.262597	0.682259	0
ENSG00000060718	1301	COL11A1	1.11486	6.24048	0.0124863	0.112369	0
ENSG00000185946	55599	RNPC3	0.287066	0.318637	0.572428	0.83654	0
ENSG00000240038	280	AMY2B	0.906549	2.19205	0.138724	0.539896	0
ENSG00000198890	55170	PRMT6	-1.06724	4.70046	0.0301545	0.214449	0
ENSG00000085491	29957	SLC25A24	0.67622	2.22136	0.136114	0.536022	0
ENSG00000162636	284611	EEIG2	1.32696	7.9855	0.00471534	0.0517634	0
ENSG00000134186	55119	PRPF38B	0.0464599	0.0104613	0.918534	0.973199	0
ENSG00000116266	6814	STXBP3	0.397137	0.761239	0.382941	0.754744	0
ENSG00000162641	254268	AKNAD1	1.69326	7.96542	0.00476794	0.0521952	0
ENSG00000121957	29899	GPSM2	0.230014	0.256335	0.612649	0.851459	0
ENSG00000121940	23155	CLCC1	0.259894	0.327643	0.56705	0.834713	0
ENSG00000085433	22911	WDR47	1.0396	4.98429	0.0255785	0.191607	0
ENSG00000244716	100132742	RPL17P7	0.404922	0.494563	0.481899	0.801507	0
ENSG00000197780	6884	TAF13	0.745007	2.62658	0.105088	0.471379	0
ENSG00000273382	NA	TMEM167B-DT	-1.10462	3.66709	0.0554971	0.323103	0
ENSG00000215717	56900	TMEM167B	0.287378	0.40675	0.523624	0.820528	0
ENSG00000116299	57535	ELAPOR1	-0.0482458	0.00810721	0.928255	0.975871	0
ENSG00000031698	6301	SARS1	0.108119	0.0589116	0.808224	0.927907	0
ENSG00000143126	1952	CELSR2	0.526975	1.15317	0.282886	0.691939	0
ENSG00000134222	84722	PSRC1	0.399461	0.672005	0.412353	0.770762	0
ENSG00000134243	6272	SORT1	0.994719	4.83787	0.0278412	0.204233	0
ENSG00000143106	5686	PSMA5	0.670813	2.24877	0.133721	0.532546	0
ENSG00000143028	284612	SYPL2	0.961299	4.68168	0.0304859	0.216317	0
ENSG00000162650	127002	ATXN7L2	0.57531	1.55093	0.212998	0.640908	0
ENSG00000174151	284613	CYB561D1	0.570348	1.49023	0.22218	0.651588	0
ENSG00000181754	57463	AMIGO1	-0.26167	0.276346	0.599106	0.847759	0
ENSG00000065135	2773	GNAI3	0.423822	0.893168	0.34462	0.733842	0
ENSG00000116337	271	AMPD2	0.0966374	0.0463287	0.829579	0.936499	0
ENSG00000168765	2948	GSTM4	-0.036814	0.0061838	0.937321	0.978759	0
ENSG00000213366	2946	GSTM2	-0.249238	0.265728	0.606212	0.850165	0
ENSG00000134184	2944	GSTM1	-0.819375	1.29654	0.254846	0.676736	0
ENSG00000184371	1435	CSF1	-0.900604	3.92253	0.0476432	0.293634	0
ENSG00000168710	10768	AHCYL1	0.355621	0.635187	0.425459	0.776979	0
ENSG00000143093	85369	STRIP1	-0.0514761	0.0126232	0.910544	0.969984	0
ENSG00000258634	NA		-0.207771	0.182665	0.669093	0.871864	0
ENSG00000156150	257	ALX3	-1.08733	4.78463	0.0287149	0.208301	0
ENSG00000197106	388662	SLC6A17	-0.991756	3.46277	0.0627652	0.349689	0
ENSG00000116396	3749	KCNC4	-0.38996	0.599713	0.438688	0.783581	0
ENSG00000162775	64783	RBM15	0.858839	3.12325	0.0771827	0.397628	0
ENSG00000224699	101410535	LAMTOR5-AS1	1.1874	3.2302	0.0722917	0.382645	0
ENSG00000168679	9122	SLC16A4	-0.44081	0.792602	0.373314	0.751855	0
ENSG00000134248	10542	LAMTOR5	0.294078	0.412289	0.52081	0.819895	0
ENSG00000261654	NA		1.32606	4.22698	0.0397862	0.261087	0
ENSG00000121931	55791	LRIF1	0.208005	0.200215	0.654547	0.866797	0
ENSG00000273010	NA		1.73244	7.41091	0.00648296	0.0669182	0
ENSG00000156171	128338	DRAM2	0.253399	0.305053	0.580732	0.84	0
ENSG00000134255	10390	CEPT1	0.446265	0.919304	0.337658	0.729589	0
ENSG00000162777	79961	DENND2D	-0.97241	1.47073	0.22523	0.655196	0
ENSG00000085465	5016	OVGP1	-0.141588	0.0589863	0.808105	0.927907	0
ENSG00000260948	NA		0.394605	0.463521	0.495983	0.808318	0
ENSG00000116455	79084	WDR77	0.718684	2.2593	0.132814	0.531224	0
ENSG00000116459	515	ATP5PB	0.612063	1.84792	0.174025	0.597989	0
ENSG00000116473	5906	RAP1A	0.672862	2.21403	0.136761	0.536529	0
ENSG00000197852	55924	INKA2	1.07129	4.92804	0.0264243	0.196354	0
ENSG00000064703	11218	DDX20	0.613893	1.76499	0.184003	0.610791	0
ENSG00000143079	55917	CTTNBP2NL	0.132682	0.0864661	0.768719	0.912818	0
ENSG00000134245	7482	WNT2B	0.741097	1.91991	0.165867	0.585953	0
ENSG00000007341	54879	ST7L	0.0963306	0.0386326	0.844178	0.94263	0
ENSG00000116489	829	CAPZA1	0.540412	1.47069	0.225236	0.655196	0
ENSG00000155363	4343	MOV10	0.192108	0.179578	0.671736	0.873077	0
ENSG00000155366	389	RHOC	0.667145	2.20869	0.137235	0.537203	0
ENSG00000155367	333926	PPM1J	-0.553992	0.750434	0.386339	0.756566	0
ENSG00000155380	6566	SLC16A1	0.969031	4.59712	0.0320257	0.223711	0
ENSG00000226419	100506392	SLC16A1-AS1	0.215815	0.183545	0.668344	0.871606	0
ENSG00000238198	100996251	LRIG2-DT	-0.297079	0.196674	0.657419	0.867665	0
ENSG00000198799	9860	LRIG2	-0.194847	0.169838	0.680256	0.876996	0
ENSG00000081026	260425	MAGI3	-0.0960594	0.039504	0.842454	0.941934	0
ENSG00000116793	10745	PHTF1	-0.417233	0.781211	0.376771	0.752647	0
ENSG00000081019	54665	RSBN1	-0.079214	0.0286378	0.865618	0.950698	0
ENSG00000134242	26191	PTPN22	0.965737	1.30804	0.25275	0.675297	0
ENSG00000134262	10717	AP4B1	0.465745	0.909745	0.340182	0.730765	0
ENSG00000118655	64858	DCLRE1B	0.169897	0.124885	0.723796	0.894284	0
ENSG00000163349	204851	HIPK1	0.419403	0.868301	0.351426	0.737892	0
ENSG00000197323	51592	TRIM33	0.45074	0.982992	0.321461	0.719537	0
ENSG00000116752	10286	BCAS2	0.426698	0.850439	0.356428	0.741826	0
ENSG00000175984	163259	DENND2C	0.119891	0.0558948	0.813106	0.929859	0
ENSG00000213281	4893	NRAS	0.284213	0.397568	0.528348	0.821683	0
ENSG00000009307	7812	CSDE1	0.461742	1.09756	0.294802	0.700484	0
ENSG00000052723	80143	SIKE1	0.712792	2.42035	0.119768	0.503089	0
ENSG00000228035	112840934	NGF-AS1	1.22112	1.18481	0.276378	0.689037	0
ENSG00000134259	4803	NGF	1.0137	4.21645	0.0400338	0.262405	0
ENSG00000173218	81839	VANGL1	0.462984	1.0232	0.311762	0.712207	0
ENSG00000163393	55356	SLC22A15	0.628128	1.54368	0.214071	0.641928	0
ENSG00000163399	476	ATP1A1	0.710103	2.56514	0.109243	0.479626	0
ENSG00000116815	965	CD58	0.0484102	0.010072	0.920059	0.973528	0
ENSG00000143061	3321	IGSF3	-1.66729	7.89406	0.00495975	0.0538824	0
ENSG00000116830	8458	TTF2	0.535506	1.27722	0.258416	0.679449	0
ENSG00000134253	80263	TRIM45	0.371413	0.543448	0.461007	0.794075	0
ENSG00000198162	10905	MAN1A2	0.141626	0.0999811	0.751852	0.906354	0
ENSG00000183508	54855	TENT5C	-0.232231	0.255491	0.613235	0.851459	0
ENSG00000196505	54834	GDAP2	0.294569	0.381827	0.536627	0.824703	0
ENSG00000065183	10885	WDR3	0.598631	1.72963	0.188458	0.616427	0
ENSG00000092607	6913	TBX15	-1.01461	4.35592	0.0368804	0.248152	0
ENSG00000116874	10352	WARS2	-0.110388	0.0511279	0.821112	0.932827	0
ENSG00000231365	101929147	WARS2-AS1	-1.08022	4.46655	0.0345647	0.236716	0
ENSG00000260941	644242	LINC00622	-0.300044	0.235349	0.627586	0.854766	0
ENSG00000143067	90874	ZNF697	0.385009	0.678261	0.410186	0.77023	0
ENSG00000092621	26227	PHGDH	0.405006	0.824492	0.36387	0.746159	0
ENSG00000134250	4853	NOTCH2	-0.341876	0.597686	0.439462	0.78417	0
ENSG00000265808	9554	SEC22B	0.11225	0.0625681	0.802482	0.925204	0
ENSG00000270231	728841	NBPF8	-0.230884	0.211009	0.645978	0.863344	0
ENSG00000275131	NA	PDE4DIPP2	-0.106678	0.0408927	0.839745	0.940808	0
ENSG00000273136	101060684	NBPF26	-0.320668	0.403547	0.525263	0.820711	0
ENSG00000226067	NA	LINC00623	-0.241123	0.12592	0.722701	0.894105	0
ENSG00000188610	653820	FAM72B	0.404132	0.50466	0.47746	0.800397	0
ENSG00000171943	653464	SRGAP2C	0.217658	0.1912	0.66192	0.868953	0
ENSG00000227082	107985194	LINC02798	-0.905776	1.9935	0.157976	0.572116	0
ENSG00000263513	554282	FAM72C	0.00222618	6.27332e-06	0.998002	0.999081	0
ENSG00000270872	NA	SRGAP2D	0.449072	0.636236	0.425077	0.776732	0
ENSG00000232527	100996732,107985200	LINC02802,LOC107985200	-0.584218	0.934647	0.333658	0.726978	0
ENSG00000266338	284565	NBPF15	0.112144	0.0562215	0.812571	0.929708	0
ENSG00000196369	647135	SRGAP2B	0.192921	0.13342	0.714912	0.890485	0
ENSG00000215784	728833	FAM72D	1.10726	2.54851	0.110398	0.482499	0
ENSG00000272419	NA	LINC01145	-0.487087	0.859203	0.353962	0.739933	0
ENSG00000223612	NA		0.00959931	0.000324021	0.985638	0.995994	0
ENSG00000162825	100288142	NBPF20	-0.280534	0.253151	0.614865	0.851459	0
ENSG00000272150	101929780	NBPF25P	0.210314	0.142771	0.705542	0.886639	0
ENSG00000117262	653519	GPR89A	0.193926	0.138968	0.709309	0.888246	0
ENSG00000265491	27246	RNF115	0.238092	0.2749	0.600063	0.848046	0
ENSG00000186141	10623	POLR3C	0.429353	0.874042	0.349839	0.736448	0
ENSG00000186364	200035	NUDT17	-0.530857	1.00426	0.316282	0.716733	0
ENSG00000131788	10401	PIAS3	0.389279	0.744703	0.388158	0.757865	0
ENSG00000143127	8515	ITGA10	-0.711646	1.68605	0.194122	0.620759	0
ENSG00000131779	8799	PEX11B	0.0148873	0.000988404	0.97492	0.992523	0
ENSG00000265241	9939	RBM8A	0.269813	0.357166	0.550085	0.828891	0
ENSG00000211451	114814	GNRHR2	-0.439299	0.442218	0.506054	0.812991	0
ENSG00000271601	128077	LIX1L	-0.039044	0.00743985	0.931264	0.977038	0
ENSG00000272031	284615	ANKRD34A	0.98949	3.76262	0.0524104	0.310934	0
ENSG00000121851	84265	POLR3GL	0.280998	0.351447	0.553295	0.830031	0
ENSG00000265972	10628	TXNIP	-0.190838	0.185971	0.666291	0.870695	0
ENSG00000271425	100132406	NBPF10	-0.42288	0.681476	0.409079	0.769671	0
ENSG00000264343	388677	NOTCH2NLA	-1.3606	3.75948	0.0525088	0.311	0
ENSG00000277406	NA	SEC22B4P	0.617227	0.901142	0.342476	0.732337	0
ENSG00000287978	100996756	LOC100996756	0.0972002	0.0293772	0.863911	0.949809	0
ENSG00000268043	149013	NBPF12	-0.225189	0.20712	0.649034	0.864299	0
ENSG00000131791	5565	PRKAB2	0.403698	0.773082	0.379265	0.753501	0
ENSG00000180867	NA	PDIA3P1	0.145831	0.0844238	0.77139	0.912818	0
ENSG00000131781	2330	FMO5	-1.47171	6.09599	0.0135489	0.119472	0
ENSG00000226015	644131	CCT8P1	-0.443021	0.446314	0.50409	0.811989	0
ENSG00000131778	9557	CHD1L	0.366526	0.462597	0.496413	0.808392	0
ENSG00000116128	607	BCL9	-0.187783	0.163797	0.685685	0.879884	0
ENSG00000162836	51205	ACP6	-0.127895	0.0641095	0.800115	0.924356	0
ENSG00000265107	2702	GJA5	1.19463	5.24168	0.0220519	0.172158	0
ENSG00000188092	51463	GPR89B	0.479837	0.785339	0.375513	0.751855	0
ENSG00000263956	200030	NBPF11	0.0448278	0.00777039	0.929758	0.976135	0
ENSG00000274020	388685	LINC01138	-1.62891	7.80997	0.00519589	0.0558691	0
ENSG00000270629	25832	NBPF14	-0.42064	0.726534	0.394009	0.762662	0
ENSG00000178104	9659	PDE4DIP	0.170743	0.141967	0.706333	0.886639	0
ENSG00000269713	400818	NBPF9	-0.0629576	0.0176191	0.894401	0.963813	0
ENSG00000274265	NA		-0.151305	0.0882819	0.766373	0.912144	0
ENSG00000286219	100996717	NOTCH2NLC	-0.772308	1.55307	0.212683	0.64045	0
ENSG00000220323	337874	H2BC19P	0.856946	2.53949	0.111031	0.483963	0
ENSG00000261716	337873	H2BC20P	1.04574	3.98772	0.0458331	0.285964	0
ENSG00000184678	8349	H2BC21	1.13852	5.22024	0.0223254	0.173948	0
ENSG00000178096	51027	BOLA1	-0.585222	1.28921	0.256194	0.677935	0
ENSG00000159164	9900	SV2A	-0.413323	0.811042	0.367812	0.749101	0
ENSG00000143368	10262	SF3B4	0.326342	0.527603	0.467617	0.795518	0
ENSG00000014914	10903	MTMR11	-0.599257	1.50698	0.219601	0.647646	0
ENSG00000264522	56957	OTUD7B	-0.00171086	1.39841e-05	0.997016	0.998884	0
ENSG00000285184	NA		0.147202	0.0668672	0.795954	0.922811	0
ENSG00000136631	11311	VPS45	0.58979	1.61107	0.204342	0.630789	0
ENSG00000023902	51177	PLEKHO1	0.246935	0.292909	0.588363	0.84379	0
ENSG00000143401	81611	ANP32E	0.521615	1.32799	0.249163	0.67398	0
ENSG00000117362	51107	APH1A	-0.0102205	0.000518697	0.98183	0.995145	0
ENSG00000118292	79630	C1orf54	-0.266168	0.287314	0.591947	0.844979	0
ENSG00000159208	148523	CIART	0.178105	0.119029	0.73009	0.897168	0
ENSG00000117360	9129	PRPF3	0.547749	1.4073	0.235506	0.665339	0
ENSG00000163125	23248	RPRD2	0.0143245	0.0010063	0.974694	0.992421	0
ENSG00000143374	80222	TARS2	0.076846	0.0253954	0.873386	0.953838	0
ENSG00000143369	1893	ECM1	-0.59281	1.78452	0.181595	0.608191	0
ENSG00000143382	54507	ADAMTSL4	-0.614244	1.8384	0.175138	0.599196	0
ENSG00000143384	4170,574406	MCL1,ADAMTSL4-AS1	0.0816974	0.0341792	0.853326	0.945846	0
ENSG00000143420	2029	ENSA	0.231947	0.26464	0.60695	0.850235	0
ENSG00000143457	55204	GOLPH3L	0.0842753	0.0334187	0.854949	0.946127	0
ENSG00000143387	1513	CTSK	-0.665378	2.23372	0.135028	0.534537	0
ENSG00000143437	405	ARNT	0.0582464	0.0167486	0.897028	0.964688	0
ENSG00000143379	9869	SETDB1	0.228863	0.246915	0.619256	0.851754	0
ENSG00000143418	29956	CERS2	0.485306	1.17585	0.278202	0.689037	0
ENSG00000259357	NA		0.570663	0.715616	0.397586	0.764104	0
ENSG00000143412	8416	ANXA9	1.19871	1.14395	0.28482	0.692114	0
ENSG00000143409	55793	MINDY1	0.21425	0.192176	0.661112	0.868472	0
ENSG00000143363	58497	PRUNE1	0.236403	0.254066	0.614227	0.851459	0
ENSG00000143443	54964	C1orf56	-0.425645	0.698427	0.403313	0.766155	0
ENSG00000197622	56882	CDC42SE1	0.716225	2.50045	0.113814	0.490181	0
ENSG00000213190	10962	MLLT11	0.966592	3.90099	0.0482576	0.295579	0
ENSG00000143458	126626	GABPB2	-0.503853	1.0527	0.304887	0.706756	0
ENSG00000261168	NA		0.0385481	0.00348933	0.952896	0.985023	0
ENSG00000143434	10500	SEMA6C	0.238907	0.223345	0.636503	0.858892	0
ENSG00000163156	79005,100534012	SCNM1,TNFAIP8L2-SCNM1	0.13577	0.0828032	0.773534	0.913548	0
ENSG00000163155	388695	LYSMD1	0.0438344	0.00762085	0.930435	0.976625	0
ENSG00000163157	29765	TMOD4	0.51598	0.626978	0.428466	0.778494	0
ENSG00000163159	6944	VPS72	0.259572	0.323031	0.569792	0.83557	0
ENSG00000143398	8394	PIP5K1A	0.299587	0.445137	0.504653	0.812402	0
ENSG00000159352	5710	PSMD4	0.371183	0.679927	0.409612	0.769889	0
ENSG00000232671	100507670	ZNF687-AS1	0.47846	0.500009	0.479496	0.801188	0
ENSG00000143373	57592	ZNF687	0.256663	0.314519	0.57492	0.837987	0
ENSG00000143393	5298	PI4KB	0.0275141	0.00374177	0.951224	0.984325	0
ENSG00000143390	5993	RFX5	0.32652	0.492638	0.482753	0.801921	0
ENSG00000143416	8991	SELENBP1	0.641998	1.90188	0.167868	0.589184	0
ENSG00000159377	5692	PSMB4	0.17632	0.154555	0.69422	0.882855	0
ENSG00000143442	23126	POGZ	0.076281	0.028474	0.865999	0.950798	0
ENSG00000143376	81609	SNX27	0.096848	0.0443117	0.833275	0.937916	0
ENSG00000143436	65005	MRPL9	0.34476	0.562315	0.453329	0.790787	0
ENSG00000143450	51686	OAZ3	-0.493725	0.568492	0.450859	0.789664	0
ENSG00000159445	117145	THEM4	0.564539	1.36986	0.241836	0.66954	0
ENSG00000197747	6281	S100A10	0.215598	0.236539	0.626717	0.854681	0
ENSG00000163191	6282	S100A11	0.457835	1.07076	0.300773	0.704602	0
ENSG00000197956	6277	S100A6	0.223143	0.259872	0.610208	0.851294	0
ENSG00000196154	6275	S100A4	0.997314	4.99773	0.0253806	0.190488	0
ENSG00000188015	6274	S100A3	1.03506	4.08286	0.0433202	0.27586	0
ENSG00000196754	6273	S100A2	-0.400485	0.516111	0.472505	0.798343	0
ENSG00000285867	NA		-0.487401	0.815188	0.366591	0.74848	0
ENSG00000188643	140576	S100A16	0.380723	0.719919	0.396171	0.76398	0
ENSG00000189171	6284	S100A13	0.254336	0.305992	0.58015	0.84	0
ENSG00000272030	NA		-0.665996	1.08264	0.298107	0.703183	0
ENSG00000160679	26097	CHTOP	0.42465	0.876037	0.349289	0.736448	0
ENSG00000143553	23557	SNAPIN	-0.030266	0.00411147	0.948874	0.983766	0
ENSG00000143621	3608	ILF2	0.49176	1.19944	0.273433	0.688413	0
ENSG00000143624	65123	INTS3	-0.348658	0.587391	0.44343	0.784833	0
ENSG00000143554	11000	SLC27A3	-0.0217348	0.00204122	0.963964	0.989115	0
ENSG00000143614	57459	GATAD2B	-0.0132048	0.000853613	0.976692	0.993363	0
ENSG00000198837	9909	DENND4B	0.490643	1.13214	0.287319	0.693436	0
ENSG00000160741	200186	CRTC2	0.254657	0.310388	0.577442	0.838989	0
ENSG00000143570	27173	SLC39A1	0.177221	0.0996626	0.752235	0.906416	0
ENSG00000282386	NA		0.983773	2.35558	0.124835	0.515024	0
ENSG00000273026	NA		0.408082	0.286544	0.592444	0.845133	0
ENSG00000143578	148327	CREB3L4	-0.0434087	0.00726417	0.932078	0.977335	0
ENSG00000143543	10899	JTB	0.104816	0.0500392	0.822995	0.933622	0
ENSG00000285641	NA		-1.00227	2.0227	0.154964	0.567443	0
ENSG00000143545	5872	RAB13	-0.791662	2.90498	0.0883064	0.429747	0
ENSG00000177954	6232	RPS27	0.471878	1.14257	0.285109	0.692114	0
ENSG00000143549	7170	TPM3	0.501758	1.27976	0.257943	0.678999	0
ENSG00000143612	25912	C1orf43	0.394827	0.773323	0.379191	0.753501	0
ENSG00000143569	9898	UBAP2L	0.425116	0.910975	0.339856	0.730765	0
ENSG00000143575	10456	HAX1	0.21156	0.216866	0.641439	0.861737	0
ENSG00000143515	57198	ATP8B2	-0.100777	0.0507282	0.821801	0.933142	0
ENSG00000160712	3570	IL6R	0.257176	0.246849	0.619303	0.851754	0
ENSG00000160714	55585	UBE2Q1	0.568187	1.58598	0.207901	0.634553	0
ENSG00000160710	103	ADAR	0.620265	1.9553	0.162017	0.578721	0
ENSG00000163344	10654	PMVK	-0.138321	0.0822678	0.774247	0.913788	0
ENSG00000163346	57326	PBXIP1	0.21563	0.231681	0.63028	0.855921	0
ENSG00000163348	90780	PYGO2	0.0445401	0.00941377	0.922707	0.974168	0
ENSG00000271380	NA		-0.539583	0.76013	0.383288	0.754744	0
ENSG00000160691	6464	SHC1	0.353692	0.637896	0.424474	0.775983	0
ENSG00000173207	1163	CKS1B	0.364229	0.578492	0.446904	0.787274	0
ENSG00000160688	80308	FLAD1	0.288614	0.364525	0.546004	0.827991	0
ENSG00000160685	51043	ZBTB7B	0.664205	2.10176	0.147129	0.555434	0
ENSG00000232093	NA	DCST1-AS1	1.13244	2.67168	0.102148	0.467763	0
ENSG00000143537	8751	ADAM15	0.690859	2.33665	0.126361	0.518464	0
ENSG00000243364	1945	EFNA4	0.0804294	0.0257665	0.872472	0.953314	0
ENSG00000143590	1944	EFNA3	0.757312	1.88379	0.169904	0.591843	0
ENSG00000169241	55974	SLC50A1	0.607847	1.66622	0.196766	0.622894	0
ENSG00000179085	54344	DPM3	-0.17017	0.117525	0.731734	0.897613	0
ENSG00000163463	200185	KRTCAP2	-0.0554644	0.0112465	0.915543	0.971697	0
ENSG00000163462	80128	TRIM46	0.133345	0.0659973	0.797256	0.923548	0
ENSG00000185499	4582	MUC1	0.318626	0.468751	0.493562	0.807705	0
ENSG00000231064	105371450	THBS3-AS1	-1.01588	3.22198	0.0726559	0.383798	0
ENSG00000169231	7059	THBS3	-0.0703454	0.0228703	0.879795	0.957691	0
ENSG00000173171	4580	MTX1	0.283555	0.349405	0.55445	0.830611	0
ENSG00000160766	2630	GBAP1	-0.555832	1.04362	0.306981	0.708101	0
ENSG00000177628	2629	GBA1	-0.47411	1.08215	0.298218	0.703217	0
ENSG00000160767	10712	ENTREP3	-0.247381	0.290235	0.59007	0.844907	0
ENSG00000116521	10067	SCAMP3	0.251954	0.306713	0.579704	0.839794	0
ENSG00000176444	1196	CLK2	0.155186	0.111542	0.738395	0.900217	0
ENSG00000143630	57657	HCN3	0.134284	0.0649601	0.798821	0.924064	0
ENSG00000160752	2224	FDPS	0.761847	2.81342	0.0934787	0.445475	0
ENSG00000225855	284618	RUSC1-AS1	-0.36657	0.378204	0.538566	0.825185	0
ENSG00000160753	23623	RUSC1	0.139858	0.0870695	0.767936	0.912419	0
ENSG00000116539	55870	ASH1L	-0.0577044	0.0165025	0.897783	0.964688	0
ENSG00000235919	645676	ASH1L-AS1	0.645591	1.09405	0.295576	0.700735	0
ENSG00000125459	55154	MSTO1	-0.233754	0.217759	0.640753	0.861474	0
ENSG00000246203	NA		-0.986159	2.16893	0.140824	0.544375	0
ENSG00000287839	NA		-0.435074	0.4876	0.485	0.803704	0
ENSG00000163374	55249	YY1AP1	0.27496	0.364503	0.546016	0.827991	0
ENSG00000132676	7818	DAP3	0.252923	0.312731	0.576009	0.838379	0
ENSG00000203761	NA	MSTO2P	-0.358487	0.348771	0.55481	0.830676	0
ENSG00000116580	54856	GON4L	0.360061	0.623435	0.429774	0.779273	0
ENSG00000132718	23208	SYT11	1.03236	5.17515	0.0229122	0.177465	0
ENSG00000143622	6016	RIT1	0.227068	0.241897	0.622839	0.852838	0
ENSG00000132680	22889	KHDC4	0.286806	0.360259	0.548363	0.828616	0
ENSG00000116584	9181	ARHGEF2	0.376839	0.708589	0.399913	0.764907	0
ENSG00000273002	107985209	ARHGEF2-AS2	0.930355	1.98211	0.159168	0.574021	0
ENSG00000163479	6746	SSR2	0.0394598	0.00786193	0.929346	0.976135	0
ENSG00000160803	56893	UBQLN4	0.538557	1.38432	0.239367	0.66681	0
ENSG00000116586	28956	LAMTOR2	0.332395	0.499353	0.479784	0.801188	0
ENSG00000254726	92312	MEX3A	-0.173751	0.120514	0.728478	0.896685	0
ENSG00000160789	4000	LMNA	0.30998	0.500548	0.479259	0.801188	0
ENSG00000196189	64218	SEMA4A	-0.543594	0.953965	0.328712	0.723921	0
ENSG00000160785	9673	SLC25A44	0.413091	0.811258	0.367748	0.749101	0
ENSG00000260238	100527963	PMF1-BGLAP	-0.992375	2.25477	0.133204	0.531978	0
ENSG00000160783	11243	PMF1	-0.0390021	0.00649006	0.935791	0.978265	0
ENSG00000198952	23381	SMG5	0.154703	0.117313	0.731967	0.897613	0
ENSG00000163472	84283	TMEM79	0.224681	0.191038	0.662054	0.868984	0
ENSG00000198715	112770	GLMP	-1.11583	5.72908	0.0166862	0.139253	0
ENSG00000163468	7203	CCT3	0.604837	1.83611	0.175407	0.599501	0
ENSG00000116604	4209	MEF2D	0.41196	0.841944	0.358841	0.743558	0
ENSG00000183856	128239	IQGAP3	0.369072	0.64877	0.420553	0.774583	0
ENSG00000163382	128240	NAXE	0.456018	0.992022	0.319249	0.718446	0
ENSG00000160818	54865	GPATCH4	0.415092	0.801961	0.370508	0.7508	0
ENSG00000272068	NA	BCAN-AS1	0.588272	0.71982	0.396203	0.76398	0
ENSG00000272405	NA		0.929236	2.73844	0.0979604	0.456732	0
ENSG00000229953	NA		0.709004	1.02713	0.310834	0.711384	0
ENSG00000132688	10763	NES	0.681609	2.37076	0.123627	0.512625	0
ENSG00000143320	1382	CRABP2	0.791244	3.19134	0.0740292	0.387926	0
ENSG00000143319	81875	ISG20L2	0.262081	0.326255	0.567872	0.835116	0
ENSG00000143303	51093	METTL25B	0.147859	0.0921705	0.761436	0.909685	0
ENSG00000143314	79590	MRPL24	0.00701009	0.000225292	0.988024	0.996505	0
ENSG00000143321	3068	HDGF	0.212709	0.23135	0.630525	0.856022	0
ENSG00000143294	5546	PRCC	-0.230257	0.257366	0.611936	0.851459	0
ENSG00000187800	375033	PEAR1	-0.638622	1.97584	0.159829	0.574542	0
ENSG00000160838	149499	LRRC71	1.47219	4.93943	0.0262508	0.195509	0
ENSG00000132694	9826	ARHGEF11	-0.0220964	0.00237353	0.961143	0.988317	0
ENSG00000117036	2117	ETV3	0.466052	1.04687	0.306229	0.707418	0
ENSG00000183853	55243	KIRREL1	0.182579	0.170077	0.680043	0.876983	0
ENSG00000163565	3428	IFI16	-0.114027	0.0648123	0.799046	0.924064	0
ENSG00000158716	54935	DUSP23	0.451898	0.797711	0.371779	0.751439	0
ENSG00000272668	107985216	LOC107985216	-0.101517	0.0328963	0.856074	0.946875	0
ENSG00000213085	25790	CFAP45	0.205937	0.125092	0.723576	0.894251	0
ENSG00000158710	8407	TAGLN2	0.553023	1.56596	0.210794	0.638426	0
ENSG00000224259	100505633	LINC01133	-0.5152	1.13046	0.287677	0.693981	0
ENSG00000143315	93183	PIGM	0.229714	0.2377	0.625873	0.854208	0
ENSG00000225279	NA		-0.492914	0.58756	0.443364	0.784833	0
ENSG00000162729	93185	IGSF8	-0.196242	0.175935	0.67489	0.874738	0
ENSG00000018625	477	ATP1A2	1.27914	0.96511	0.325903	0.721597	0
ENSG00000143318	844	CASQ1	-1.60594	1.3638	0.242881	0.670243	0
ENSG00000227741	729867	LOC729867	0.413836	0.402371	0.525867	0.820824	0
ENSG00000162734	8682	PEA15	0.64006	2.09523	0.14776	0.555949	0
ENSG00000132716	50717	DCAF8	-0.0851684	0.0341577	0.853372	0.945846	0
ENSG00000228606	100287049	DCAF8-DT	0.7994	1.56419	0.211052	0.638426	0
ENSG00000162735	5824	PEX19	0.0689119	0.0228965	0.879727	0.957691	0
ENSG00000122218	1314	COPA	0.633959	2.04804	0.152402	0.564365	0
ENSG00000162736	23385	NCSTN	0.371174	0.687115	0.407147	0.768794	0
ENSG00000171786	4807	NHLH1	1.14677	3.38249	0.0658926	0.360034	0
ENSG00000213080	NA		0.603166	0.964518	0.326051	0.721597	0
ENSG00000158773	7391	USF1	0.417177	0.804457	0.369764	0.750259	0
ENSG00000143256	5202	PFDN2	0.396786	0.746559	0.387568	0.757765	0
ENSG00000158793	4817	NIT1	-0.237966	0.243218	0.621891	0.852788	0
ENSG00000158796	9191	DEDD	0.501719	1.20787	0.271754	0.687211	0
ENSG00000143222	51506	UFC1	0.12761	0.0791461	0.778458	0.915651	0
ENSG00000143258	27005	USP21	0.12601	0.070069	0.791236	0.920978	0
ENSG00000143224	5498	PPOX	-0.341237	0.462151	0.49662	0.808544	0
ENSG00000158850	8703	B4GALT3	0.276986	0.349198	0.554568	0.830611	0
ENSG00000158859	9507	ADAMTS4	-1.42505	4.3581	0.0368334	0.248042	0
ENSG00000158864	4720	NDUFS2	0.321116	0.503743	0.47786	0.800725	0
ENSG00000158882	84134	TOMM40L	-0.25351	0.265847	0.606131	0.850165	0
ENSG00000143252	6391	SDHC	0.183665	0.162856	0.686541	0.879884	0
ENSG00000283696	NA		-0.34319	0.313427	0.575585	0.838152	0
ENSG00000143226	2212	FCGR2A	-1.23178	4.36329	0.0367212	0.247605	0
ENSG00000173110	3310	HSPA6	-1.15067	3.43656	0.0637682	0.353342	0
ENSG00000244682	NA	FCGR2C	-1.09843	2.54599	0.110575	0.482913	0
ENSG00000132185	84824	FCRLA	-0.767071	1.55187	0.212859	0.640647	0
ENSG00000162746	127943	FCRLB	0.100932	0.0347355	0.852151	0.9457	0
ENSG00000081721	11266	DUSP12	0.134174	0.077974	0.780062	0.915794	0
ENSG00000118217	22926	ATF6	0.33583	0.55759	0.455233	0.791502	0
ENSG00000162745	25903	OLFML2B	-1.16788	5.61953	0.0177614	0.145675	0
ENSG00000198929	9722	NOS1AP	-2.07852	6.86027	0.00881334	0.0854764	0
ENSG00000239887	400793	C1orf226	-1.697	6.75452	0.00935105	0.0894233	0
ENSG00000152332	127933	UHMK1	0.604641	1.81827	0.177519	0.602104	0
ENSG00000117143	6675	UAP1	0.587399	1.70092	0.192167	0.619602	0
ENSG00000162733	4921	DDR2	0.140613	0.10131	0.750263	0.905578	0
ENSG00000132196	51478	HSD17B7	1.06459	4.05506	0.0440392	0.278343	0
ENSG00000185860	339512	CCDC190	1.76568	6.19774	0.0127914	0.114591	0
ENSG00000232995	8490	RGS5	0.926818	2.38012	0.122888	0.511551	0
ENSG00000143228	83540	NUF2	1.05163	4.69671	0.0302204	0.214821	0
ENSG00000185630	5087	PBX1	-0.367902	0.672253	0.412267	0.770762	0
ENSG00000269887	NA		0.105611	0.0265053	0.870672	0.952516	0
ENSG00000143198	4259	MGST3	0.39031	0.737643	0.390417	0.759723	0
ENSG00000143149	223	ALDH9A1	0.489495	1.18105	0.277141	0.689037	0
ENSG00000143183	54499	TMCO1	0.406371	0.816205	0.366292	0.748233	0
ENSG00000143179	7371	UCK2	0.967832	4.52846	0.0333356	0.230405	0
ENSG00000143157	57645	POGK	0.440009	0.94153	0.331885	0.725584	0
ENSG00000152382	117143	TADA1	0.633668	1.63114	0.201546	0.628272	0
ENSG00000225171	100873912	DUTP6	0.023746	0.00140023	0.97015	0.990582	0
ENSG00000143190	5451	POU2F1	0.22276	0.225063	0.635209	0.857911	0
ENSG00000197965	9019	MPZL1	0.75691	2.8552	0.091079	0.438094	0
ENSG00000143158	25874	MPC2	0.371971	0.646512	0.421363	0.775158	0
ENSG00000143164	55827	DCAF6	0.178047	0.15728	0.691673	0.881728	0
ENSG00000143147	23432	GPR161	-0.174574	0.147185	0.70124	0.88543	0
ENSG00000143155	261726	TIPRL	0.340737	0.567754	0.451153	0.789664	0
ENSG00000213064	375035	SFT2D2	-0.0629553	0.0193588	0.889343	0.961754	0
ENSG00000143178	9095	TBX19	-0.511355	0.911846	0.339625	0.730765	0
ENSG00000143153	481	ATP1B1	1.17535	6.36943	0.0116103	0.105951	0
ENSG00000143156	29922	NME7	0.536886	1.25614	0.262383	0.682127	0
ENSG00000117475	8548	BLZF1	0.699182	2.28798	0.13038	0.526439	0
ENSG00000117479	10560	SLC19A2	0.424648	0.708331	0.399998	0.764907	0
ENSG00000213062	NA		0.790293	1.93647	0.164052	0.58242	0
ENSG00000000460	55732	C1orf112	0.413422	0.684972	0.40788	0.768794	0
ENSG00000171806	92342	METTL18	0.379639	0.551913	0.457537	0.792585	0
ENSG00000000457	57147	SCYL3	-0.290442	0.356867	0.550251	0.828891	0
ENSG00000075945	22920	KIFAP3	0.527329	1.32889	0.249002	0.67398	0
ENSG00000120370	92344	GORAB	0.224141	0.221784	0.637684	0.859483	0
ENSG00000116132	5396	PRRX1	-0.393129	0.775755	0.378443	0.753346	0
ENSG00000271811	NA		0.0707512	0.0124231	0.911253	0.970122	0
ENSG00000231424	NA		-0.633182	1.2414	0.265201	0.68408	0
ENSG00000285665	NA	TOP1P1	1.71451	6.97899	0.00824722	0.0809339	0
ENSG00000117523	23215	PRRC2C	0.225717	0.259586	0.610404	0.851341	0
ENSG00000117533	8674	VAMP4	-0.369224	0.629855	0.427409	0.778362	0
ENSG00000010165	51603	METTL13	-0.185445	0.157388	0.691573	0.881728	0
ENSG00000197959	26052	DNM3	-0.63169	1.20271	0.272781	0.687458	0
ENSG00000230630	NA	DNM3OS	1.06282	4.87553	0.0272402	0.200992	0
ENSG00000135845	5279	PIGC	0.439723	0.884812	0.346887	0.734795	0
ENSG00000094975	51430	SUCO	0.325655	0.51012	0.475087	0.799571	0
ENSG00000117586	7292	TNFSF4	1.30279	5.62671	0.0176888	0.145293	0
ENSG00000203739	101928673	PRDX6-AS1	0.58247	1.14658	0.284266	0.692114	0
ENSG00000076321	27252	KLHL20	0.388383	0.715656	0.397572	0.764104	0
ENSG00000120334	91687	CENPL	0.585469	1.45549	0.227649	0.6586	0
ENSG00000117593	55157	DARS2	0.796771	2.8452	0.0916473	0.44008	0
ENSG00000234741	60674	GAS5	-0.00822805	0.000337728	0.985338	0.995994	0
ENSG00000270084	NA	GAS5-AS1	-0.654517	1.24862	0.263816	0.683354	0
ENSG00000185278	84614	ZBTB37	0.362627	0.540116	0.462385	0.794396	0
ENSG00000135870	149041	RC3H1	0.432238	0.895102	0.344099	0.73357	0
ENSG00000152061	9910	RABGAP1L	0.502274	1.18269	0.276809	0.689037	0
ENSG00000116161	27101	CACYBP	0.61232	1.80379	0.179255	0.604293	0
ENSG00000120333	63931	MRPS14	0.23606	0.253666	0.614505	0.851459	0
ENSG00000235750	9674	KIAA0040	1.21832	6.13292	0.0132687	0.11786	0
ENSG00000143207	64326	COP1	-0.06863	0.0221542	0.881678	0.958578	0
ENSG00000242193	730102	CRYZL2P	-1.18982	5.1108	0.0237773	0.182341	0
ENSG00000224687	100302401	RASAL2-AS1	1.33834	5.43721	0.0197121	0.157807	0
ENSG00000075391	9462	RASAL2	1.0309	5.10042	0.02392	0.183107	0
ENSG00000213058	NA		0.237838	0.230557	0.631111	0.85638	0
ENSG00000213057	400798	C1orf220	-0.220408	0.144727	0.703626	0.886228	0
ENSG00000273384	NA		-0.248347	0.168031	0.681867	0.877854	0
ENSG00000273062	NA	RALGPS2-AS1	0.700942	0.808716	0.3685	0.749276	0
ENSG00000116191	55103	RALGPS2	0.701734	2.41027	0.120542	0.505125	0
ENSG00000116199	9917	FAM20B	0.491509	1.19363	0.274598	0.688848	0
ENSG00000186283	64222	TOR3A	0.133766	0.0837345	0.772299	0.913118	0
ENSG00000143322	27	ABL2	0.50602	1.23679	0.266091	0.684808	0
ENSG00000057252	6646	SOAT1	0.225541	0.239225	0.624766	0.853513	0
ENSG00000169905	163590	TOR1AIP2	0.182729	0.164908	0.684677	0.879453	0
ENSG00000272906	NA		1.12825	3.4566	0.0629997	0.350441	0
ENSG00000143337	26092	TOR1AIP1	0.545897	1.47162	0.225091	0.655196	0
ENSG00000135837	9857	CEP350	-0.0180396	0.00159182	0.968175	0.989948	0
ENSG00000116260	5768	QSOX1	0.291198	0.434514	0.509782	0.814993	0
ENSG00000230124	84320,100527964	ACBD6,LHX4-AS1	-0.0980474	0.0461439	0.829914	0.936528	0
ENSG00000143324	9213	XPR1	0.373458	0.6659	0.414485	0.771927	0
ENSG00000135835	57710	KIAA1614	-0.547775	1.26794	0.260154	0.680991	0
ENSG00000243155	NA		0.649052	1.2452	0.26447	0.683792	0
ENSG00000232586	103344928	KIAA1614-AS1	1.45735	5.70417	0.0169246	0.140576	0
ENSG00000135823	10228	STX6	0.508753	1.25289	0.263001	0.682491	0
ENSG00000153029	3140	MR1	0.0169338	0.00139162	0.970242	0.990582	0
ENSG00000162783	51278	IER5	-0.407333	0.811111	0.367792	0.749101	0
ENSG00000135821	2752	GLUL	-0.0473709	0.0114006	0.914969	0.9716	0
ENSG00000135828	6041	RNASEL	0.117076	0.0619103	0.803502	0.925592	0
ENSG00000261504	284648	LINC01686	1.82454	6.99947	0.00815339	0.0801631	0
ENSG00000287808	NA	DHX9-AS1	1.64407	4.63462	0.031333	0.220569	0
ENSG00000135829	1660	DHX9	0.362539	0.660397	0.41642	0.772519	0
ENSG00000135862	3915	LAMC1	0.561333	1.63823	0.200568	0.627022	0
ENSG00000116698	9887	SMG7	0.513403	1.29951	0.254302	0.675976	0
ENSG00000162704	10092	ARPC5	0.649707	2.13285	0.144172	0.550835	0
ENSG00000143344	23179	RGL1	-0.352209	0.592372	0.441503	0.784183	0
ENSG00000198756	23127	COLGALT2	-0.911116	2.19205	0.138725	0.539896	0
ENSG00000198860	116461	TSEN15	0.680641	2.21978	0.136253	0.536022	0
ENSG00000116667	81563	C1orf21	-1.06331	4.87056	0.0273186	0.201476	0
ENSG00000116406	80267	EDEM3	-0.457916	1.00775	0.315442	0.715803	0
ENSG00000135842	116496	NIBAN1	-0.0279765	0.00392458	0.950048	0.984144	0
ENSG00000121481	6045	RNF2	0.0470175	0.0101687	0.919678	0.973295	0
ENSG00000121486	81627	TRMT1L	-0.00705571	0.000218844	0.988197	0.996505	0
ENSG00000116668	54823	SWT1	0.447742	0.759798	0.383392	0.754744	0
ENSG00000279838	NA		0.648569	0.928021	0.335378	0.728194	0
ENSG00000116679	10625	IVNS1ABP	0.712222	2.47978	0.115319	0.493896	0
ENSG00000273004	NA		1.21504	3.03322	0.0815762	0.410779	0
ENSG00000143341	83872	HMCN1	-0.353309	0.596879	0.439771	0.78417	0
ENSG00000047410	7175	TPR	0.528737	1.39872	0.236939	0.665351	0
ENSG00000157181	54953	ODR4	0.0334761	0.00508085	0.943175	0.981028	0
ENSG00000073756	5743	PTGS2	-1.13049	6.1085	0.0134533	0.11903	0
ENSG00000231767	100271374	RPS27AP5	-0.276155	0.199987	0.654731	0.866863	0
ENSG00000116741	5997	RGS2	-0.390302	0.709015	0.399771	0.764781	0
ENSG00000116750	51377	UCHL5	0.469156	1.03613	0.308723	0.709924	0
ENSG00000116747	6738	RO60	0.565086	1.54891	0.213296	0.641298	0
ENSG00000023572	51022	GLRX2	0.94706	3.86099	0.0494211	0.300868	0
ENSG00000134371	79577	CDC73	0.528379	1.35973	0.243584	0.670947	0
ENSG00000162630	8707	B3GALT2	0.936287	3.53612	0.0600458	0.340267	0
ENSG00000232077	101929184	LINC01031	2.27087	6.88429	0.00869565	0.0848055	0
ENSG00000066279	259266	ASPM	0.381663	0.713124	0.398409	0.764234	0
ENSG00000177888	360023	ZBTB41	0.497729	1.16959	0.279485	0.689876	0
ENSG00000213047	163486	DENND1B	0.580192	1.51326	0.218642	0.646685	0
ENSG00000203724	388722	C1orf53	-0.146132	0.0793921	0.778123	0.915604	0
ENSG00000143355	56956	LHX9	0.313005	0.480306	0.488284	0.805263	0
ENSG00000151414	140609	NEK7	0.905423	4.12226	0.0423225	0.272971	0
ENSG00000116833	2494	NR5A2	-1.00238	3.30779	0.0689523	0.370327	0
ENSG00000203721	554279	LINC00862	1.88889	6.5986	0.0102059	0.0956895	0
ENSG00000162702	23528	ZNF281	1.05802	5.41766	0.0199341	0.159098	0
ENSG00000282849	NA		0.485324	0.187843	0.664718	0.870049	0
ENSG00000118193	9928	KIF14	0.77538	2.69245	0.100825	0.46431	0
ENSG00000118197	83479	DDX59	0.195982	0.162188	0.68715	0.879884	0
ENSG00000118200	23271	CAMSAP2	0.201271	0.200528	0.654295	0.866682	0
ENSG00000116857	252839	TMEM9	0.14329	0.0993712	0.752585	0.906416	0
ENSG00000174307	23612	PHLDA3	-1.07972	5.56149	0.0183598	0.149183	0
ENSG00000159176	1465	CSRP1	0.671542	2.29882	0.129473	0.524796	0
ENSG00000224536	107985246	CSRP1-AS1	-0.515631	0.629386	0.427581	0.778362	0
ENSG00000223396	NA	RPS10P7	0.0429552	0.00513238	0.942888	0.981028	0
ENSG00000134369	89796	NAV1	-0.427986	0.930525	0.334727	0.727807	0
ENSG00000198700	55705	IPO9	0.259537	0.333944	0.563346	0.834102	0
[truncated: 13,921 more rows]

## Sheet: Up in wt
ensembl	entrez	symbol	WT01_WT10_logFC	WT01_WT10_LR	WT01_WT10_PValue	WT01_WT10_FDR	WT01_WT10_DE
[truncated: 15,731 more rows]
