# Supplementary material for: LEO1 Is Required for Efficient Entry into Quiescence, Control of H3K9 Methylation and Gene Expression in Human Fibroblasts
Source: Biomolecules. 2023 Nov 17;13(11):1662. doi: 10.3390/biom13111662 (PMC10668985; doi:10.3390/biom13111662)
Supplement: Supplementary file 1 [file biomolecules-13-01662-s001.zip › Supplementary Tables S1-S4.xlsx]

## Sheet: Table S1 Down in wt 0.1 vs 10
Analysis Type:	PANTHER Overrepresentation Test (Released 20231017)
Annotation Version and Release Date:	GO Ontology database DOI: 10.5281/zenodo.7942786 Released 2023-01-05
Analyzed List:	upload_1 (Homo sapiens)
Reference List:	Homo sapiens (all genes in database)
Test Type:	FISHER
Correction:	FDR
GO biological process complete	Homo sapiens - REFLIST (20592)	upload_1 (4768)	upload_1 (expected)	upload_1 (over/under)	upload_1 (fold Enrichment)	upload_1 (raw P-value)	upload_1 (FDR)
double-strand break repair via break-induced replication (GO:0000727)	12	11	2.78	+	3.96	1.47E-03	3.55E-02
mitotic DNA replication (GO:1902969)	14	12	3.24	+	3.70	1.33E-03	3.30E-02
purine deoxyribonucleotide metabolic process (GO:0009151)	16	13	3.70	+	3.51	1.18E-03	2.98E-02
nuclear DNA replication (GO:0033260)	26	20	6.02	+	3.32	1.72E-04	6.10E-03
kinetochore organization (GO:0051383)	17	13	3.94	+	3.30	1.73E-03	4.03E-02
DNA unwinding involved in DNA replication (GO:0006268)	21	16	4.86	+	3.29	5.41E-04	1.56E-02
regulation of mitotic cell cycle spindle assembly checkpoint (GO:0090266)	20	15	4.63	+	3.24	8.98E-04	2.38E-02
regulation of spindle checkpoint (GO:0090231)	20	15	4.63	+	3.24	8.98E-04	2.38E-02
regulation of mitotic spindle checkpoint (GO:1903504)	20	15	4.63	+	3.24	8.98E-04	2.38E-02
cell cycle DNA replication (GO:0044786)	27	20	6.25	+	3.20	2.04E-04	7.05E-03
negative regulation of mitotic sister chromatid separation (GO:2000816)	33	24	7.64	+	3.14	4.82E-05	2.08E-03
negative regulation of mitotic sister chromatid segregation (GO:0033048)	33	24	7.64	+	3.14	4.82E-05	2.08E-03
negative regulation of sister chromatid segregation (GO:0033046)	33	24	7.64	+	3.14	4.82E-05	2.07E-03
negative regulation of mitotic metaphase/anaphase transition (GO:0045841)	33	24	7.64	+	3.14	4.82E-05	2.07E-03
branched-chain amino acid catabolic process (GO:0009083)	21	15	4.86	+	3.08	1.83E-03	4.20E-02
negative regulation of metaphase/anaphase transition of cell cycle (GO:1902100)	35	25	8.10	+	3.08	3.92E-05	1.73E-03
DNA replication initiation (GO:0006270)	28	20	6.48	+	3.08	2.55E-04	8.52E-03
negative regulation of chromosome separation (GO:1905819)	35	25	8.10	+	3.08	3.92E-05	1.72E-03
spindle checkpoint signaling (GO:0031577)	31	22	7.18	+	3.06	1.26E-04	4.66E-03
negative regulation of mitotic nuclear division (GO:0045839)	41	29	9.49	+	3.05	1.04E-05	5.22E-04
mitotic spindle assembly checkpoint signaling (GO:0007094)	30	21	6.95	+	3.02	2.04E-04	7.08E-03
mitotic spindle checkpoint signaling (GO:0071174)	30	21	6.95	+	3.02	2.04E-04	7.07E-03
spindle assembly checkpoint signaling (GO:0071173)	30	21	6.95	+	3.02	2.04E-04	7.05E-03
negative regulation of chromosome segregation (GO:0051985)	36	25	8.34	+	3.00	5.25E-05	2.23E-03
regulation of mitotic sister chromatid separation (GO:0010965)	58	40	13.43	+	2.98	3.91E-07	2.74E-05
regulation of mitotic sister chromatid segregation (GO:0033047)	54	37	12.50	+	2.96	1.21E-06	7.60E-05
branched-chain amino acid metabolic process (GO:0009081)	27	18	6.25	+	2.88	8.58E-04	2.31E-02
attachment of spindle microtubules to kinetochore (GO:0008608)	26	17	6.02	+	2.82	1.38E-03	3.37E-02
negative regulation of nuclear division (GO:0051784)	48	31	11.11	+	2.79	3.14E-05	1.43E-03
regulation of chromosome separation (GO:1905818)	73	47	16.90	+	2.78	2.10E-07	1.53E-05
positive regulation of mitochondrial membrane permeability (GO:0035794)	32	20	7.41	+	2.70	9.88E-04	2.57E-02
NADP metabolic process (GO:0006739)	37	23	8.57	+	2.68	3.75E-04	1.15E-02
intra-Golgi vesicle-mediated transport (GO:0006891)	34	21	7.87	+	2.67	7.54E-04	2.07E-02
substrate adhesion-dependent cell spreading (GO:0034446)	47	29	10.88	+	2.66	8.46E-05	3.29E-03
protein depolymerization (GO:0051261)	39	24	9.03	+	2.66	2.98E-04	9.50E-03
pyruvate metabolic process (GO:0006090)	71	43	16.44	+	2.62	2.78E-06	1.60E-04
regulation of autophagy of mitochondrion (GO:1903146)	38	23	8.80	+	2.61	4.68E-04	1.39E-02
centrosome duplication (GO:0051298)	35	21	8.10	+	2.59	9.24E-04	2.43E-02
cortical cytoskeleton organization (GO:0030865)	50	30	11.58	+	2.59	7.91E-05	3.13E-03
regulation of mitotic nuclear division (GO:0007088)	117	70	27.09	+	2.58	2.35E-09	2.72E-07
regulation of cell cycle checkpoint (GO:1901976)	47	28	10.88	+	2.57	1.56E-04	5.60E-03
cortical actin cytoskeleton organization (GO:0030866)	42	25	9.72	+	2.57	4.08E-04	1.23E-02
positive regulation of microtubule polymerization or depolymerization (GO:0031112)	36	21	8.34	+	2.52	1.74E-03	4.04E-02
glycolytic process (GO:0006096)	45	26	10.42	+	2.50	3.72E-04	1.14E-02
positive regulation of G1/S transition of mitotic cell cycle (GO:1900087)	42	24	9.72	+	2.47	7.34E-04	2.02E-02
DNA-templated DNA replication (GO:0006261)	135	77	31.26	+	2.46	1.61E-09	1.89E-07
cell cycle G2/M phase transition (GO:0044839)	58	33	13.43	+	2.46	7.61E-05	3.03E-03
mitotic spindle organization (GO:0007052)	95	54	22.00	+	2.45	4.74E-07	3.27E-05
Schwann cell differentiation (GO:0014037)	37	21	8.57	+	2.45	1.94E-03	4.43E-02
G2/M transition of mitotic cell cycle (GO:0000086)	53	30	12.27	+	2.44	1.90E-04	6.63E-03
actin cytoskeleton reorganization (GO:0031532)	55	31	12.74	+	2.43	1.47E-04	5.36E-03
semaphorin-plexin signaling pathway (GO:0071526)	43	24	9.96	+	2.41	8.79E-04	2.36E-02
regulation of DNA-templated DNA replication (GO:0090329)	52	29	12.04	+	2.41	2.88E-04	9.28E-03
microtubule cytoskeleton organization involved in mitosis (GO:1902850)	130	72	30.10	+	2.39	1.81E-08	1.74E-06
protein targeting to ER (GO:0045047)	38	21	8.80	+	2.39	2.23E-03	4.98E-02
retrograde vesicle-mediated transport, Golgi to endoplasmic reticulum (GO:0006890)	49	27	11.35	+	2.38	5.66E-04	1.62E-02
mitotic spindle assembly (GO:0090307)	49	27	11.35	+	2.38	5.66E-04	1.62E-02
cell-substrate junction assembly (GO:0007044)	40	22	9.26	+	2.38	1.72E-03	4.01E-02
deoxyribonucleotide metabolic process (GO:0009262)	42	23	9.72	+	2.37	2.06E-03	4.65E-02
deoxyribose phosphate metabolic process (GO:0019692)	42	23	9.72	+	2.37	2.06E-03	4.64E-02
establishment of protein localization to endoplasmic reticulum (GO:0072599)	42	23	9.72	+	2.37	2.06E-03	4.63E-02
regulation of mitotic metaphase/anaphase transition (GO:0030071)	90	49	20.84	+	2.35	5.30E-06	2.79E-04
cellular response to nerve growth factor stimulus (GO:1990090)	46	25	10.65	+	2.35	1.12E-03	2.87E-02
mitotic cytokinesis (GO:0000281)	83	45	19.22	+	2.34	1.15E-05	5.74E-04
vesicle cytoskeletal trafficking (GO:0099518)	65	35	15.05	+	2.33	1.49E-04	5.41E-03
regulation of metaphase/anaphase transition of cell cycle (GO:1902099)	93	50	21.53	+	2.32	4.51E-06	2.43E-04
positive regulation of cell cycle G1/S phase transition (GO:1902808)	56	30	12.97	+	2.31	4.29E-04	1.28E-02
cell cycle G1/S phase transition (GO:0044843)	86	46	19.91	+	2.31	1.52E-05	7.35E-04
regulation of amyloid precursor protein catabolic process (GO:1902991)	43	23	9.96	+	2.31	2.24E-03	4.99E-02
regulation of sister chromatid segregation (GO:0033045)	105	56	24.31	+	2.30	1.38E-06	8.48E-05
microtubule polymerization or depolymerization (GO:0031109)	60	32	13.89	+	2.30	2.54E-04	8.49E-03
axo-dendritic transport (GO:0008088)	74	39	17.13	+	2.28	8.39E-05	3.29E-03
mitotic sister chromatid segregation (GO:0000070)	135	71	31.26	+	2.27	8.27E-08	6.59E-06
sister chromatid segregation (GO:0000819)	139	73	32.18	+	2.27	7.03E-08	5.68E-06
regulation of nuclear division (GO:0051783)	145	76	33.57	+	2.26	3.24E-08	2.89E-06
G1/S transition of mitotic cell cycle (GO:0000082)	84	44	19.45	+	2.26	3.23E-05	1.47E-03
mitotic nuclear division (GO:0140014)	161	84	37.28	+	2.25	8.17E-09	8.52E-07
regulation of spindle organization (GO:0090224)	48	25	11.11	+	2.25	1.49E-03	3.58E-02
response to nerve growth factor (GO:1990089)	48	25	11.11	+	2.25	1.49E-03	3.58E-02
pyridine-containing compound metabolic process (GO:0072524)	79	41	18.29	+	2.24	5.61E-05	2.34E-03
regulation of mitochondrial membrane permeability (GO:0046902)	60	31	13.89	+	2.23	6.26E-04	1.77E-02
regulation of macroautophagy (GO:0016241)	157	81	36.35	+	2.23	2.25E-08	2.12E-06
DNA replication (GO:0006260)	200	103	46.31	+	2.22	2.76E-10	3.58E-08
cell cycle phase transition (GO:0044770)	176	90	40.75	+	2.21	4.95E-09	5.42E-07
mitotic cell cycle process (GO:1903047)	522	266	120.87	+	2.20	4.53E-24	2.01E-21
purine nucleoside bisphosphate biosynthetic process (GO:0034033)	53	27	12.27	+	2.20	1.39E-03	3.39E-02
ribonucleoside bisphosphate biosynthetic process (GO:0034030)	53	27	12.27	+	2.20	1.39E-03	3.38E-02
nucleoside bisphosphate biosynthetic process (GO:0033866)	53	27	12.27	+	2.20	1.39E-03	3.38E-02
spindle organization (GO:0007051)	163	83	37.74	+	2.20	2.39E-08	2.22E-06
mitotic cell cycle phase transition (GO:0044772)	165	84	38.21	+	2.20	1.84E-08	1.77E-06
DNA-templated DNA replication maintenance of fidelity (GO:0045005)	55	28	12.74	+	2.20	1.08E-03	2.76E-02
response to gamma radiation (GO:0010332)	55	28	12.74	+	2.20	1.08E-03	2.76E-02
apoptotic mitochondrial changes (GO:0008637)	59	30	13.66	+	2.20	9.10E-04	2.40E-02
positive regulation of mitotic cell cycle (GO:0045931)	120	61	27.79	+	2.20	1.99E-06	1.19E-04
maintenance of protein location in cell (GO:0032507)	65	33	15.05	+	2.19	4.08E-04	1.23E-02
regulation of chromosome segregation (GO:0051983)	131	66	30.33	+	2.18	8.50E-07	5.55E-05
pyridine nucleotide metabolic process (GO:0019362)	72	36	16.67	+	2.16	2.93E-04	9.40E-03
centrosome cycle (GO:0007098)	90	45	20.84	+	2.16	5.53E-05	2.32E-03
protein localization to endoplasmic reticulum (GO:0070972)	68	34	15.75	+	2.16	4.98E-04	1.46E-02
DNA duplex unwinding (GO:0032508)	76	38	17.60	+	2.16	2.51E-04	8.40E-03
nicotinamide nucleotide metabolic process (GO:0046496)	72	36	16.67	+	2.16	2.93E-04	9.38E-03
mitotic cell cycle (GO:0000278)	616	307	142.63	+	2.15	1.48E-26	7.43E-24
organelle transport along microtubule (GO:0072384)	83	41	19.22	+	2.13	1.82E-04	6.37E-03
regulation of microtubule cytoskeleton organization (GO:0070507)	156	77	36.12	+	2.13	1.92E-07	1.42E-05
positive regulation of macroautophagy (GO:0016239)	75	37	17.37	+	2.13	3.59E-04	1.11E-02
spindle localization (GO:0051653)	63	31	14.59	+	2.13	1.27E-03	3.17E-02
endoplasmic reticulum to Golgi vesicle-mediated transport (GO:0006888)	124	61	28.71	+	2.12	4.26E-06	2.31E-04
axonal transport (GO:0098930)	61	30	14.12	+	2.12	1.13E-03	2.88E-02
cytokinesis (GO:0000910)	114	56	26.40	+	2.12	1.10E-05	5.53E-04
regulation of phosphoprotein phosphatase activity (GO:0043666)	57	28	13.20	+	2.12	1.91E-03	4.38E-02
cytoskeleton-dependent cytokinesis (GO:0061640)	112	55	25.93	+	2.12	1.45E-05	7.07E-04
positive regulation of mitotic cell cycle phase transition (GO:1901992)	90	44	20.84	+	2.11	9.07E-05	3.48E-03
DNA geometric change (GO:0032392)	82	40	18.99	+	2.11	2.58E-04	8.59E-03
vesicle budding from membrane (GO:0006900)	76	37	17.60	+	2.10	3.92E-04	1.19E-02
negative regulation of protein polymerization (GO:0032272)	74	36	17.13	+	2.10	5.14E-04	1.50E-02
establishment of spindle localization (GO:0051293)	58	28	13.43	+	2.08	2.12E-03	4.76E-02
regulation of reactive oxygen species metabolic process (GO:2000377)	144	69	33.34	+	2.07	2.24E-06	1.31E-04
cell cycle checkpoint signaling (GO:0000075)	161	77	37.28	+	2.07	6.23E-07	4.19E-05
regulation of microtubule polymerization or depolymerization (GO:0031110)	88	42	20.38	+	2.06	2.61E-04	8.67E-03
Rho protein signal transduction (GO:0007266)	65	31	15.05	+	2.06	1.49E-03	3.58E-02
actin polymerization or depolymerization (GO:0008154)	63	30	14.59	+	2.06	1.95E-03	4.43E-02
regulation of membrane permeability (GO:0090559)	72	34	16.67	+	2.04	1.05E-03	2.71E-02
regulation of protein dephosphorylation (GO:0035304)	87	41	20.14	+	2.04	3.68E-04	1.13E-02
alpha-amino acid biosynthetic process (GO:1901607)	66	31	15.28	+	2.03	1.67E-03	3.92E-02
ERAD pathway (GO:0036503)	98	46	22.69	+	2.03	1.53E-04	5.51E-03
positive regulation of cell cycle phase transition (GO:1901989)	113	53	26.16	+	2.03	5.41E-05	2.28E-03
post-Golgi vesicle-mediated transport (GO:0006892)	96	45	22.23	+	2.02	1.98E-04	6.92E-03
Golgi vesicle transport (GO:0048193)	284	133	65.76	+	2.02	1.08E-10	1.50E-08
protein targeting to membrane (GO:0006612)	92	43	21.30	+	2.02	2.41E-04	8.15E-03
microtubule organizing center organization (GO:0031023)	107	50	24.78	+	2.02	8.32E-05	3.27E-03
establishment of vesicle localization (GO:0051650)	167	78	38.67	+	2.02	9.37E-07	6.04E-05
membrane docking (GO:0022406)	90	42	20.84	+	2.02	3.08E-04	9.73E-03
mitotic cell cycle checkpoint signaling (GO:0007093)	127	59	29.41	+	2.01	2.72E-05	1.25E-03
maintenance of protein location (GO:0045185)	97	45	22.46	+	2.00	2.16E-04	7.38E-03
autophagosome organization (GO:1905037)	82	38	18.99	+	2.00	6.30E-04	1.78E-02
cell division (GO:0051301)	521	240	120.64	+	1.99	1.45E-17	4.41E-15
negative regulation of cell cycle phase transition (GO:1901988)	228	105	52.79	+	1.99	2.52E-08	2.32E-06
Ras protein signal transduction (GO:0007265)	189	87	43.76	+	1.99	3.57E-07	2.53E-05
protein N-linked glycosylation (GO:0006487)	74	34	17.13	+	1.98	1.79E-03	4.13E-02
purine nucleoside triphosphate metabolic process (GO:0009144)	148	68	34.27	+	1.98	6.73E-06	3.48E-04
spindle assembly (GO:0051225)	98	45	22.69	+	1.98	2.39E-04	8.08E-03
regulation of mitochondrial membrane potential (GO:0051881)	72	33	16.67	+	1.98	1.65E-03	3.89E-02
regulation of mitochondrion organization (GO:0010821)	155	71	35.89	+	1.98	4.71E-06	2.50E-04
positive regulation of endothelial cell migration (GO:0010595)	107	49	24.78	+	1.98	1.81E-04	6.35E-03
nucleoside triphosphate metabolic process (GO:0009141)	166	76	38.44	+	1.98	2.82E-06	1.62E-04
positive regulation of protein polymerization (GO:0032273)	92	42	21.30	+	1.97	5.08E-04	1.49E-02
regulation of protein targeting (GO:1903533)	79	36	18.29	+	1.97	1.14E-03	2.90E-02
negative regulation of mitotic cell cycle phase transition (GO:1901991)	167	76	38.67	+	1.97	2.98E-06	1.70E-04
vascular transport (GO:0010232)	86	39	19.91	+	1.96	7.92E-04	2.15E-02
transport across blood-brain barrier (GO:0150104)	86	39	19.91	+	1.96	7.92E-04	2.15E-02
nuclear chromosome segregation (GO:0098813)	236	107	54.64	+	1.96	2.83E-08	2.57E-06
autophagosome assembly (GO:0000045)	75	34	17.37	+	1.96	1.90E-03	4.37E-02
actin cytoskeleton organization (GO:0030036)	543	246	125.73	+	1.96	2.44E-17	7.29E-15
regulation of response to endoplasmic reticulum stress (GO:1905897)	84	38	19.45	+	1.95	1.02E-03	2.64E-02
chromosome segregation (GO:0007059)	332	150	76.87	+	1.95	5.97E-11	8.83E-09
establishment or maintenance of cell polarity (GO:0007163)	204	92	47.24	+	1.95	4.01E-07	2.80E-05
DNA conformation change (GO:0071103)	91	41	21.07	+	1.95	7.09E-04	1.98E-02
positive regulation of epithelial cell migration (GO:0010634)	151	68	34.96	+	1.94	1.17E-05	5.82E-04
response to hydrogen peroxide (GO:0042542)	100	45	23.15	+	1.94	3.82E-04	1.16E-02
recombinational repair (GO:0000725)	120	54	27.79	+	1.94	1.24E-04	4.58E-03
double-strand break repair via homologous recombination (GO:0000724)	116	52	26.86	+	1.94	1.44E-04	5.25E-03
purine ribonucleoside triphosphate metabolic process (GO:0009205)	143	64	33.11	+	1.93	2.34E-05	1.09E-03
vesicle localization (GO:0051648)	181	81	41.91	+	1.93	2.18E-06	1.29E-04
negative regulation of organelle organization (GO:0010639)	340	152	78.73	+	1.93	9.34E-11	1.34E-08
ribonucleoside triphosphate metabolic process (GO:0009199)	150	67	34.73	+	1.93	1.63E-05	7.78E-04
positive regulation of organelle assembly (GO:1902117)	83	37	19.22	+	1.93	1.43E-03	3.45E-02
response to unfolded protein (GO:0006986)	119	53	27.55	+	1.92	1.69E-04	6.01E-03
regulation of dephosphorylation (GO:0035303)	128	57	29.64	+	1.92	9.09E-05	3.48E-03
negative regulation of cytoskeleton organization (GO:0051494)	155	69	35.89	+	1.92	1.45E-05	7.06E-04
small GTPase mediated signal transduction (GO:0007264)	263	117	60.90	+	1.92	1.41E-08	1.39E-06
regulation of protein polymerization (GO:0032271)	196	87	45.38	+	1.92	1.15E-06	7.32E-05
regulation of protein depolymerization (GO:1901879)	88	39	20.38	+	1.91	1.28E-03	3.18E-02
mitochondrial transport (GO:0006839)	149	66	34.50	+	1.91	2.26E-05	1.06E-03
regulation of generation of precursor metabolites and energy (GO:0043467)	104	46	24.08	+	1.91	4.76E-04	1.40E-02
positive regulation of cytoskeleton organization (GO:0051495)	186	82	43.07	+	1.90	2.89E-06	1.66E-04
ATP metabolic process (GO:0046034)	118	52	27.32	+	1.90	2.31E-04	7.88E-03
cellular response to decreased oxygen levels (GO:0036294)	134	59	31.03	+	1.90	8.71E-05	3.38E-03
regulation of actin filament polymerization (GO:0030833)	134	59	31.03	+	1.90	8.71E-05	3.37E-03
cellular response to oxygen levels (GO:0071453)	150	66	34.73	+	1.90	3.29E-05	1.49E-03
actomyosin structure organization (GO:0031032)	116	51	26.86	+	1.90	3.02E-04	9.58E-03
regulation of cytokinesis (GO:0032465)	91	40	21.07	+	1.90	1.07E-03	2.76E-02
protein-containing complex disassembly (GO:0032984)	139	61	32.18	+	1.90	5.72E-05	2.38E-03
negative regulation of cell cycle process (GO:0010948)	274	120	63.44	+	1.89	2.43E-08	2.25E-06
actin filament-based process (GO:0030029)	603	264	139.62	+	1.89	4.61E-17	1.32E-14
ribose phosphate biosynthetic process (GO:0046390)	217	95	50.25	+	1.89	5.80E-07	3.93E-05
positive regulation of intracellular protein transport (GO:0090316)	158	69	36.58	+	1.89	2.44E-05	1.13E-03
mitochondrial membrane organization (GO:0007006)	117	51	27.09	+	1.88	3.16E-04	9.96E-03
actin filament organization (GO:0007015)	280	122	64.83	+	1.88	2.31E-08	2.16E-06
negative regulation of mitotic cell cycle (GO:0045930)	214	93	49.55	+	1.88	1.01E-06	6.46E-05
positive regulation of supramolecular fiber organization (GO:1902905)	175	76	40.52	+	1.88	9.97E-06	5.04E-04
purine-containing compound biosynthetic process (GO:0072522)	242	105	56.03	+	1.87	2.37E-07	1.73E-05
dicarboxylic acid metabolic process (GO:0043648)	90	39	20.84	+	1.87	1.49E-03	3.59E-02
regulation of mitotic cell cycle (GO:0007346)	494	214	114.38	+	1.87	1.06E-13	2.14E-11
organophosphate biosynthetic process (GO:0090407)	545	236	126.19	+	1.87	6.44E-15	1.54E-12
nucleoside phosphate biosynthetic process (GO:1901293)	268	116	62.05	+	1.87	5.33E-08	4.55E-06
response to topologically incorrect protein (GO:0035966)	141	61	32.65	+	1.87	8.80E-05	3.39E-03
nucleotide biosynthetic process (GO:0009165)	266	115	61.59	+	1.87	6.74E-08	5.51E-06
regulation of autophagy (GO:0010506)	352	152	81.50	+	1.86	5.17E-10	6.47E-08
protein polymerization (GO:0051258)	102	44	23.62	+	1.86	9.01E-04	2.38E-02
regulation of actin polymerization or depolymerization (GO:0008064)	153	66	35.43	+	1.86	5.49E-05	2.30E-03
regulation of intracellular protein transport (GO:0033157)	230	99	53.26	+	1.86	7.56E-07	5.02E-05
negative regulation of protein binding (GO:0032091)	93	40	21.53	+	1.86	1.67E-03	3.93E-02
positive regulation of intracellular transport (GO:0032388)	200	86	46.31	+	1.86	4.06E-06	2.20E-04
phosphatidylinositol biosynthetic process (GO:0006661)	128	55	29.64	+	1.86	2.70E-04	8.85E-03
establishment of organelle localization (GO:0051656)	391	168	90.53	+	1.86	1.02E-10	1.45E-08
signal transduction in response to DNA damage (GO:0042770)	142	61	32.88	+	1.86	9.49E-05	3.61E-03
regulation of cell cycle G2/M phase transition (GO:1902749)	112	48	25.93	+	1.85	7.22E-04	2.00E-02
cytoskeleton-dependent intracellular transport (GO:0030705)	203	87	47.00	+	1.85	3.42E-06	1.92E-04
glycerophospholipid biosynthetic process (GO:0046474)	203	87	47.00	+	1.85	3.42E-06	1.91E-04
regulation of cytoskeleton organization (GO:0051493)	516	221	119.48	+	1.85	1.06E-13	2.12E-11
regulation of actin filament organization (GO:0110053)	271	116	62.75	+	1.85	8.68E-08	6.81E-06
cell cycle process (GO:0022402)	881	377	203.99	+	1.85	9.29E-23	3.70E-20
negative regulation of supramolecular fiber organization (GO:1902904)	159	68	36.82	+	1.85	5.18E-05	2.20E-03
phosphatidylinositol metabolic process (GO:0046488)	152	65	35.20	+	1.85	7.42E-05	2.97E-03
endoplasmic reticulum organization (GO:0007029)	96	41	22.23	+	1.84	1.94E-03	4.43E-02
organelle fission (GO:0048285)	335	143	77.57	+	1.84	3.57E-09	4.07E-07
regulation of cell cycle phase transition (GO:1901987)	434	185	100.49	+	1.84	1.75E-11	2.72E-09
phospholipid biosynthetic process (GO:0008654)	244	104	56.50	+	1.84	5.25E-07	3.60E-05
glycerolipid biosynthetic process (GO:0045017)	223	95	51.63	+	1.84	1.56E-06	9.44E-05
purine ribonucleotide biosynthetic process (GO:0009152)	195	83	45.15	+	1.84	9.03E-06	4.58E-04
positive regulation of protein-containing complex assembly (GO:0031334)	200	85	46.31	+	1.84	5.87E-06	3.07E-04
aerobic respiration (GO:0009060)	160	68	37.05	+	1.84	5.46E-05	2.30E-03
positive regulation of cell cycle process (GO:0090068)	252	107	58.35	+	1.83	3.89E-07	2.75E-05
purine nucleotide biosynthetic process (GO:0006164)	231	98	53.49	+	1.83	1.16E-06	7.38E-05
ribonucleotide biosynthetic process (GO:0009260)	210	89	48.62	+	1.83	4.61E-06	2.46E-04
DNA integrity checkpoint signaling (GO:0031570)	118	50	27.32	+	1.83	6.76E-04	1.90E-02
regulation of mitotic cell cycle phase transition (GO:1901990)	333	141	77.10	+	1.83	6.45E-09	6.96E-07
regulation of actin filament length (GO:0030832)	156	66	36.12	+	1.83	8.96E-05	3.44E-03
regulation of protein localization to cell periphery (GO:1904375)	133	56	30.80	+	1.82	3.41E-04	1.06E-02
maintenance of location in cell (GO:0051651)	100	42	23.15	+	1.81	1.69E-03	3.96E-02
regulation of G2/M transition of mitotic cell cycle (GO:0010389)	100	42	23.15	+	1.81	1.69E-03	3.95E-02
intracellular protein transport (GO:0006886)	694	291	160.69	+	1.81	1.00E-16	2.72E-14
organelle localization (GO:0051640)	528	221	122.26	+	1.81	7.00E-13	1.26E-10
regulation of supramolecular fiber organization (GO:1902903)	380	159	87.99	+	1.81	1.31E-09	1.57E-07
negative regulation of cell cycle (GO:0045786)	361	151	83.59	+	1.81	4.18E-09	4.71E-07
purine nucleotide metabolic process (GO:0006163)	422	176	97.71	+	1.80	2.10E-10	2.81E-08
Golgi organization (GO:0007030)	144	60	33.34	+	1.80	2.09E-04	7.20E-03
organelle disassembly (GO:1903008)	108	45	25.01	+	1.80	1.69E-03	3.95E-02
glucose metabolic process (GO:0006006)	120	50	27.79	+	1.80	7.49E-04	2.06E-02
cytosolic transport (GO:0016482)	156	65	36.12	+	1.80	1.26E-04	4.66E-03
double-strand break repair (GO:0006302)	209	87	48.39	+	1.80	8.80E-06	4.51E-04
cell-substrate adhesion (GO:0031589)	185	77	42.84	+	1.80	3.12E-05	1.43E-03
cellular response to hypoxia (GO:0071456)	125	52	28.94	+	1.80	6.59E-04	1.85E-02
establishment of protein localization to membrane (GO:0090150)	224	93	51.87	+	1.79	4.54E-06	2.43E-04
nuclear division (GO:0000280)	309	128	71.55	+	1.79	8.73E-08	6.82E-06
nucleotide metabolic process (GO:0009117)	481	199	111.37	+	1.79	2.57E-11	3.94E-09
hexose metabolic process (GO:0019318)	162	67	37.51	+	1.79	1.18E-04	4.38E-03
response to endoplasmic reticulum stress (GO:0034976)	225	93	52.10	+	1.79	6.37E-06	3.31E-04
mitochondrion organization (GO:0007005)	458	189	106.05	+	1.78	9.61E-11	1.37E-08
response to ionizing radiation (GO:0010212)	143	59	33.11	+	1.78	3.78E-04	1.15E-02
protein targeting (GO:0006605)	257	106	59.51	+	1.78	1.31E-06	8.14E-05
proteasomal protein catabolic process (GO:0010498)	381	157	88.22	+	1.78	3.68E-09	4.18E-07
positive regulation of protein ubiquitination (GO:0031398)	124	51	28.71	+	1.78	8.85E-04	2.36E-02
proteasome-mediated ubiquitin-dependent protein catabolic process (GO:0043161)	346	142	80.11	+	1.77	3.00E-08	2.70E-06
nucleoside phosphate metabolic process (GO:0006753)	490	201	113.46	+	1.77	3.69E-11	5.56E-09
nucleobase-containing small molecule metabolic process (GO:0055086)	561	230	129.90	+	1.77	1.06E-12	1.87E-10
regulation of protein-containing complex assembly (GO:0043254)	418	171	96.79	+	1.77	1.24E-09	1.49E-07
ribose phosphate metabolic process (GO:0019693)	372	152	86.14	+	1.76	1.25E-08	1.25E-06
regulation of intracellular transport (GO:0032386)	338	138	78.26	+	1.76	5.67E-08	4.78E-06
regulation of protein-containing complex disassembly (GO:0043244)	125	51	28.94	+	1.76	9.41E-04	2.45E-02
response to oxygen levels (GO:0070482)	314	128	72.71	+	1.76	2.02E-07	1.48E-05
purine-containing compound metabolic process (GO:0072521)	454	185	105.12	+	1.76	2.97E-10	3.81E-08
intracellular transport (GO:0046907)	1368	557	316.76	+	1.76	2.37E-29	1.47E-26
regulation of organelle organization (GO:0033043)	1174	478	271.84	+	1.76	4.82E-25	2.27E-22
oxidative phosphorylation (GO:0006119)	118	48	27.32	+	1.76	1.37E-03	3.35E-02
purine ribonucleotide metabolic process (GO:0009150)	342	139	79.19	+	1.76	6.62E-08	5.44E-06
cellular respiration (GO:0045333)	192	78	44.46	+	1.75	5.73E-05	2.37E-03
monosaccharide metabolic process (GO:0005996)	192	78	44.46	+	1.75	5.73E-05	2.37E-03
vesicle organization (GO:0016050)	340	138	78.73	+	1.75	8.40E-08	6.66E-06
peptidyl-serine phosphorylation (GO:0018105)	190	77	43.99	+	1.75	7.29E-05	2.93E-03
nucleoside triphosphate biosynthetic process (GO:0009142)	114	46	26.40	+	1.74	2.18E-03	4.87E-02
positive regulation of cell-substrate adhesion (GO:0010811)	129	52	29.87	+	1.74	1.10E-03	2.80E-02
energy derivation by oxidation of organic compounds (GO:0015980)	263	106	60.90	+	1.74	3.14E-06	1.77E-04
ribonucleotide metabolic process (GO:0009259)	363	146	84.05	+	1.74	4.33E-08	3.78E-06
response to decreased oxygen levels (GO:0036293)	286	115	66.22	+	1.74	1.19E-06	7.52E-05
regulation of epithelial cell migration (GO:0010632)	229	92	53.02	+	1.74	1.46E-05	7.07E-04
positive regulation of protein modification by small protein conjugation or removal (GO:1903322)	142	57	32.88	+	1.73	6.97E-04	1.95E-02
autophagy (GO:0006914)	317	127	73.40	+	1.73	4.24E-07	2.95E-05
process utilizing autophagic mechanism (GO:0061919)	317	127	73.40	+	1.73	4.24E-07	2.94E-05
regulation of peptidyl-serine phosphorylation (GO:0033135)	140	56	32.42	+	1.73	8.80E-04	2.36E-02
regulation of DNA replication (GO:0006275)	130	52	30.10	+	1.73	1.55E-03	3.69E-02
cellular response to chemical stress (GO:0062197)	270	108	62.52	+	1.73	3.07E-06	1.74E-04
transport along microtubule (GO:0010970)	165	66	38.21	+	1.73	3.46E-04	1.07E-02
regulation of cell shape (GO:0008360)	140	56	32.42	+	1.73	8.80E-04	2.35E-02
regulation of actin cytoskeleton organization (GO:0032956)	343	137	79.42	+	1.72	1.74E-07	1.31E-05
protein transport (GO:0015031)	1187	474	274.85	+	1.72	1.92E-23	8.04E-21
cell cycle (GO:0007049)	1270	507	294.06	+	1.72	4.84E-25	2.21E-22
cellular response to oxidative stress (GO:0034599)	218	87	50.48	+	1.72	3.27E-05	1.48E-03
macroautophagy (GO:0016236)	198	79	45.85	+	1.72	7.35E-05	2.95E-03
organophosphate metabolic process (GO:0019637)	900	359	208.39	+	1.72	7.84E-18	2.44E-15
establishment of protein localization (GO:0045184)	1284	512	297.31	+	1.72	3.08E-25	1.49E-22
regulation of cell cycle process (GO:0010564)	725	289	167.87	+	1.72	2.16E-14	4.79E-12
establishment of cell polarity (GO:0030010)	133	53	30.80	+	1.72	1.27E-03	3.18E-02
carbohydrate derivative biosynthetic process (GO:1901137)	600	239	138.93	+	1.72	4.47E-12	7.46E-10
regulation of protein ubiquitination (GO:0031396)	216	86	50.01	+	1.72	4.10E-05	1.79E-03
endosomal transport (GO:0016197)	239	95	55.34	+	1.72	1.54E-05	7.37E-04
vacuolar transport (GO:0007034)	169	67	39.13	+	1.71	2.99E-04	9.52E-03
regulation of actin filament-based process (GO:0032970)	385	152	89.15	+	1.71	6.88E-08	5.59E-06
positive regulation of autophagy (GO:0010508)	152	60	35.20	+	1.70	7.38E-04	2.03E-02
vacuole organization (GO:0007033)	188	74	43.53	+	1.70	1.74E-04	6.17E-03
generation of precursor metabolites and energy (GO:0006091)	371	146	85.90	+	1.70	1.40E-07	1.07E-05
chromosome organization (GO:0051276)	455	179	105.35	+	1.70	4.86E-09	5.36E-07
cellular response to insulin stimulus (GO:0032869)	150	59	34.73	+	1.70	9.30E-04	2.43E-02
proton transmembrane transport (GO:1902600)	145	57	33.57	+	1.70	1.06E-03	2.74E-02
negative regulation of apoptotic signaling pathway (GO:2001234)	229	90	53.02	+	1.70	3.62E-05	1.62E-03
supramolecular fiber organization (GO:0097435)	591	232	136.84	+	1.70	2.70E-11	4.11E-09
maintenance of location (GO:0051235)	176	69	40.75	+	1.69	3.76E-04	1.15E-02
negative regulation of protein-containing complex assembly (GO:0031333)	148	58	34.27	+	1.69	1.17E-03	2.97E-02
cytoskeleton organization (GO:0007010)	1249	488	289.20	+	1.69	1.57E-22	6.09E-20
regulation of protein modification by small protein conjugation or removal (GO:1903320)	256	100	59.28	+	1.69	2.02E-05	9.51E-04
regulation of G1/S transition of mitotic cell cycle (GO:2000045)	164	64	37.97	+	1.69	6.15E-04	1.75E-02
regulation of microtubule-based process (GO:0032886)	259	101	59.97	+	1.68	1.67E-05	7.97E-04
myeloid cell homeostasis (GO:0002262)	136	53	31.49	+	1.68	1.92E-03	4.40E-02
positive regulation of cell cycle (GO:0045787)	344	134	79.65	+	1.68	7.98E-07	5.27E-05
peptidyl-serine modification (GO:0018209)	208	81	48.16	+	1.68	1.39E-04	5.09E-03
establishment of localization in cell (GO:0051649)	1785	695	413.31	+	1.68	3.20E-32	2.76E-29
membrane organization (GO:0061024)	759	295	175.74	+	1.68	1.23E-13	2.35E-11
response to reactive oxygen species (GO:0000302)	175	68	40.52	+	1.68	4.89E-04	1.44E-02
regulation of intrinsic apoptotic signaling pathway (GO:2001242)	170	66	39.36	+	1.68	5.61E-04	1.61E-02
regulation of cell-substrate adhesion (GO:0010810)	219	85	50.71	+	1.68	8.46E-05	3.30E-03
glycerophospholipid metabolic process (GO:0006650)	286	111	66.22	+	1.68	7.13E-06	3.68E-04
endomembrane system organization (GO:0010256)	554	215	128.28	+	1.68	3.59E-10	4.53E-08
positive regulation of cell migration (GO:0030335)	534	207	123.65	+	1.67	8.07E-10	9.79E-08
regulation of protein localization to membrane (GO:1905475)	181	70	41.91	+	1.67	4.45E-04	1.33E-02
negative regulation of phosphate metabolic process (GO:0045936)	404	156	93.54	+	1.67	1.29E-07	9.95E-06
protein localization to plasma membrane (GO:0072659)	202	78	46.77	+	1.67	2.06E-04	7.08E-03
response to hypoxia (GO:0001666)	272	105	62.98	+	1.67	1.46E-05	7.08E-04
negative regulation of phosphorus metabolic process (GO:0010563)	405	156	93.78	+	1.66	1.36E-07	1.04E-05
protein localization to membrane (GO:0072657)	465	179	107.67	+	1.66	1.63E-08	1.59E-06
vesicle-mediated transport (GO:0016192)	1302	501	301.47	+	1.66	4.53E-22	1.60E-19
regulation of endothelial cell migration (GO:0010594)	169	65	39.13	+	1.66	7.33E-04	2.02E-02
regulation of Ras protein signal transduction (GO:0046578)	190	73	43.99	+	1.66	3.40E-04	1.07E-02
positive regulation of organelle organization (GO:0010638)	508	195	117.63	+	1.66	4.70E-09	5.21E-07
regulation of stress-activated protein kinase signaling cascade (GO:0070302)	193	74	44.69	+	1.66	3.66E-04	1.13E-02
electron transport chain (GO:0022900)	167	64	38.67	+	1.66	9.12E-04	2.40E-02
protein localization (GO:0008104)	1931	740	447.12	+	1.66	1.11E-32	1.08E-29
cellular macromolecule localization (GO:0070727)	1937	741	448.51	+	1.65	1.37E-32	1.25E-29
regulation of cell cycle G1/S phase transition (GO:1902806)	191	73	44.23	+	1.65	4.57E-04	1.36E-02
protein localization to cell periphery (GO:1990778)	246	94	56.96	+	1.65	6.22E-05	2.56E-03
localization within membrane (GO:0051668)	555	212	128.51	+	1.65	1.53E-09	1.81E-07
microtubule cytoskeleton organization (GO:0000226)	555	212	128.51	+	1.65	1.53E-09	1.80E-07
intrinsic apoptotic signaling pathway (GO:0097193)	165	63	38.21	+	1.65	1.14E-03	2.90E-02
glycosylation (GO:0070085)	236	90	54.64	+	1.65	1.07E-04	3.99E-03
non-membrane-bounded organelle assembly (GO:0140694)	320	122	74.09	+	1.65	4.99E-06	2.65E-04
dephosphorylation (GO:0016311)	223	85	51.63	+	1.65	1.67E-04	5.96E-03
vascular process in circulatory system (GO:0003018)	265	101	61.36	+	1.65	3.59E-05	1.61E-03
positive regulation of cellular component biogenesis (GO:0044089)	510	194	118.09	+	1.64	8.78E-09	9.09E-07
regulation of chromosome organization (GO:0033044)	250	95	57.89	+	1.64	7.00E-05	2.83E-03
regulation of organelle assembly (GO:1902115)	214	81	49.55	+	1.63	2.97E-04	9.48E-03
phosphorus metabolic process (GO:0006793)	1839	694	425.81	+	1.63	6.47E-29	3.86E-26
phosphate-containing compound metabolic process (GO:0006796)	1813	684	419.79	+	1.63	1.80E-28	1.04E-25
protein glycosylation (GO:0006486)	220	83	50.94	+	1.63	2.68E-04	8.83E-03
macromolecule glycosylation (GO:0043413)	220	83	50.94	+	1.63	2.68E-04	8.81E-03
response to oxidative stress (GO:0006979)	367	138	84.98	+	1.62	2.16E-06	1.28E-04
regulation of stress-activated MAPK cascade (GO:0032872)	189	71	43.76	+	1.62	7.59E-04	2.08E-02
amino acid metabolic process (GO:0006520)	285	107	65.99	+	1.62	3.69E-05	1.64E-03
protein dephosphorylation (GO:0006470)	168	63	38.90	+	1.62	1.65E-03	3.90E-02
DNA repair (GO:0006281)	510	191	118.09	+	1.62	3.41E-08	3.01E-06
phospholipid metabolic process (GO:0006644)	358	134	82.89	+	1.62	3.77E-06	2.08E-04
positive regulation of cell motility (GO:2000147)	559	209	129.43	+	1.61	6.86E-09	7.29E-07
negative regulation of protein localization (GO:1903828)	206	77	47.70	+	1.61	5.39E-04	1.56E-02
regulation of cellular component size (GO:0032535)	364	136	84.28	+	1.61	3.41E-06	1.92E-04
cellular response to stress (GO:0033554)	1600	597	370.47	+	1.61	8.96E-24	3.87E-21
DNA damage response (GO:0006974)	764	285	176.90	+	1.61	1.27E-11	2.08E-09
exocytosis (GO:0006887)	239	89	55.34	+	1.61	2.03E-04	7.06E-03
regulation of cellular component biogenesis (GO:0044087)	967	360	223.91	+	1.61	2.59E-14	5.67E-12
regulation of cell cycle (GO:0051726)	1119	416	259.10	+	1.61	2.45E-16	6.35E-14
protein localization to organelle (GO:0033365)	730	271	169.03	+	1.60	7.38E-11	1.08E-08
cellular localization (GO:0051641)	2695	1000	624.02	+	1.60	8.52E-41	1.47E-37
positive regulation of locomotion (GO:0040017)	575	213	133.14	+	1.60	1.03E-08	1.06E-06
negative regulation of protein modification process (GO:0031400)	462	171	106.97	+	1.60	3.01E-07	2.16E-05
negative regulation of cellular component organization (GO:0051129)	708	262	163.93	+	1.60	2.04E-10	2.75E-08
carbohydrate derivative metabolic process (GO:1901135)	981	363	227.15	+	1.60	3.74E-14	8.08E-12
negative regulation of protein kinase activity (GO:0006469)	200	74	46.31	+	1.60	7.94E-04	2.15E-02
establishment of protein localization to organelle (GO:0072594)	344	127	79.65	+	1.59	1.26E-05	6.25E-04
regulation of cell morphogenesis (GO:0022604)	247	91	57.19	+	1.59	2.50E-04	8.41E-03
negative regulation of protein phosphorylation (GO:0001933)	318	117	73.63	+	1.59	3.10E-05	1.43E-03
negative regulation of phosphorylation (GO:0042326)	348	128	80.58	+	1.59	1.40E-05	6.86E-04
regulation of plasma membrane bounded cell projection assembly (GO:0120032)	196	72	45.38	+	1.59	1.20E-03	3.03E-02
regulation of anatomical structure size (GO:0090066)	501	184	116.00	+	1.59	1.70E-07	1.29E-05
organelle organization (GO:0006996)	3054	1121	707.14	+	1.59	1.02E-44	3.96E-41
small molecule biosynthetic process (GO:0044283)	461	169	106.74	+	1.58	6.35E-07	4.25E-05
phosphorylation (GO:0016310)	882	323	204.22	+	1.58	2.93E-12	5.06E-10
regulation of GTPase activity (GO:0043087)	366	134	84.75	+	1.58	1.02E-05	5.12E-04
nitrogen compound transport (GO:0071705)	1623	594	375.80	+	1.58	4.31E-22	1.56E-19
glycerolipid metabolic process (GO:0046486)	356	130	82.43	+	1.58	1.35E-05	6.64E-04
negative regulation of kinase activity (GO:0033673)	222	81	51.40	+	1.58	6.39E-04	1.80E-02
regulation of cell projection assembly (GO:0060491)	198	72	45.85	+	1.57	1.65E-03	3.90E-02
glycoprotein biosynthetic process (GO:0009101)	278	101	64.37	+	1.57	1.52E-04	5.50E-03
microtubule-based process (GO:0007017)	818	297	189.40	+	1.57	4.98E-11	7.44E-09
cellular component disassembly (GO:0022411)	325	118	75.25	+	1.57	4.77E-05	2.07E-03
intracellular signal transduction (GO:0035556)	1554	564	359.82	+	1.57	2.28E-20	7.70E-18
regulation of cellular response to stress (GO:0080135)	642	233	148.65	+	1.57	7.07E-09	7.47E-07
regulation of protein localization (GO:0032880)	871	316	201.68	+	1.57	1.34E-11	2.17E-09
modification-dependent protein catabolic process (GO:0019941)	593	215	137.31	+	1.57	3.48E-08	3.05E-06
ubiquitin-dependent protein catabolic process (GO:0006511)	583	211	134.99	+	1.56	4.61E-08	3.98E-06
regulation of small GTPase mediated signal transduction (GO:0051056)	304	110	70.39	+	1.56	1.02E-04	3.83E-03
MAPK cascade (GO:0000165)	216	78	50.01	+	1.56	1.18E-03	2.98E-02
macromolecule localization (GO:0033036)	2371	856	549.00	+	1.56	5.30E-31	4.11E-28
apoptotic signaling pathway (GO:0097190)	313	113	72.47	+	1.56	7.71E-05	3.06E-03
positive regulation of establishment of protein localization (GO:1904951)	330	119	76.41	+	1.56	5.39E-05	2.28E-03
positive regulation of protein localization (GO:1903829)	477	172	110.45	+	1.56	1.20E-06	7.53E-05
ameboidal-type cell migration (GO:0001667)	200	72	46.31	+	1.55	1.74E-03	4.04E-02
positive regulation of protein transport (GO:0051222)	314	113	72.71	+	1.55	1.00E-04	3.78E-03
modification-dependent macromolecule catabolic process (GO:0043632)	604	217	139.85	+	1.55	4.58E-08	3.97E-06
proteolysis involved in protein catabolic process (GO:0051603)	656	235	151.89	+	1.55	1.58E-08	1.55E-06
regulation of protein kinase activity (GO:0045859)	615	220	142.40	+	1.54	5.73E-08	4.81E-06
microtubule-based transport (GO:0099111)	207	74	47.93	+	1.54	2.04E-03	4.62E-02
regulation of cellular catabolic process (GO:0031329)	649	232	150.27	+	1.54	2.22E-08	2.10E-06
regulation of apoptotic signaling pathway (GO:2001233)	375	134	86.83	+	1.54	2.67E-05	1.23E-03
response to starvation (GO:0042594)	213	76	49.32	+	1.54	1.82E-03	4.20E-02
protein phosphorylation (GO:0006468)	707	252	163.70	+	1.54	6.85E-09	7.33E-07
regulation of cellular localization (GO:0060341)	977	348	226.22	+	1.54	7.23E-12	1.19E-09
regulation of protein catabolic process (GO:0042176)	369	131	85.44	+	1.53	3.84E-05	1.69E-03
regulation of establishment of protein localization (GO:0070201)	536	190	124.11	+	1.53	8.00E-07	5.26E-05
regulation of protein transport (GO:0051223)	511	181	118.32	+	1.53	1.56E-06	9.47E-05
carbohydrate metabolic process (GO:0005975)	449	159	103.96	+	1.53	7.34E-06	3.77E-04
regulation of protein serine/threonine kinase activity (GO:0071900)	359	127	83.13	+	1.53	6.30E-05	2.57E-03
regulation of vesicle-mediated transport (GO:0060627)	536	189	124.11	+	1.52	1.02E-06	6.54E-05
regulation of cellular component organization (GO:0051128)	2438	859	564.51	+	1.52	3.28E-28	1.82E-25
regulation of cell migration (GO:0030334)	932	328	215.80	+	1.52	1.04E-10	1.46E-08
small molecule metabolic process (GO:0044281)	1674	589	387.61	+	1.52	8.11E-19	2.57E-16
regulation of catabolic process (GO:0009894)	1013	356	234.56	+	1.52	1.53E-11	2.42E-09
organonitrogen compound biosynthetic process (GO:1901566)	1346	472	311.66	+	1.51	6.87E-15	1.59E-12
positive regulation of cellular component organization (GO:0051130)	1118	392	258.87	+	1.51	1.71E-12	2.99E-10
cellular response to external stimulus (GO:0071496)	328	115	75.95	+	1.51	1.75E-04	6.18E-03
endocytosis (GO:0006897)	535	187	123.88	+	1.51	2.01E-06	1.20E-04
cellular response to peptide (GO:1901653)	309	108	71.55	+	1.51	3.05E-04	9.66E-03
protein catabolic process (GO:0030163)	774	270	179.22	+	1.51	1.04E-08	1.06E-06
cellular response to peptide hormone stimulus (GO:0071375)	247	86	57.19	+	1.50	1.44E-03	3.49E-02
DNA recombination (GO:0006310)	247	86	57.19	+	1.50	1.44E-03	3.48E-02
positive regulation of protein kinase activity (GO:0045860)	365	127	84.51	+	1.50	1.14E-04	4.25E-03
viral process (GO:0016032)	256	89	59.28	+	1.50	1.36E-03	3.33E-02
cellular response to extracellular stimulus (GO:0031668)	259	90	59.97	+	1.50	1.15E-03	2.92E-02
regulation of protein modification process (GO:0031399)	1442	501	333.89	+	1.50	3.16E-15	7.78E-13
regulation of cell motility (GO:2000145)	990	343	229.23	+	1.50	1.59E-10	2.16E-08
carboxylic acid metabolic process (GO:0019752)	840	291	194.50	+	1.50	4.61E-09	5.15E-07
negative regulation of locomotion (GO:0040013)	338	117	78.26	+	1.49	2.67E-04	8.81E-03
organic substance transport (GO:0071702)	2214	766	512.64	+	1.49	3.50E-23	1.43E-20
positive regulation of cellular catabolic process (GO:0031331)	318	110	73.63	+	1.49	3.66E-04	1.13E-02
negative regulation of transferase activity (GO:0051348)	266	92	61.59	+	1.49	1.31E-03	3.26E-02
protein polyubiquitination (GO:0000209)	243	84	56.27	+	1.49	2.11E-03	4.75E-02
regulation of phosphate metabolic process (GO:0019220)	1314	452	304.25	+	1.49	3.17E-13	5.86E-11
lipid biosynthetic process (GO:0008610)	605	208	140.09	+	1.48	1.23E-06	7.70E-05
regulation of phosphorus metabolic process (GO:0051174)	1315	452	304.48	+	1.48	3.23E-13	5.91E-11
secretion by cell (GO:0032940)	419	144	97.02	+	1.48	6.46E-05	2.63E-03
glycoprotein metabolic process (GO:0009100)	350	120	81.04	+	1.48	2.69E-04	8.83E-03
negative regulation of cell motility (GO:2000146)	301	103	69.70	+	1.48	8.17E-04	2.21E-02
DNA metabolic process (GO:0006259)	772	264	178.75	+	1.48	6.09E-08	5.03E-06
positive regulation of cell projection organization (GO:0031346)	354	121	81.97	+	1.48	2.88E-04	9.26E-03
regulation of protein phosphorylation (GO:0001932)	1071	366	247.99	+	1.48	1.39E-10	1.92E-08
regulation of kinase activity (GO:0043549)	709	242	164.17	+	1.47	2.82E-07	2.04E-05
oxoacid metabolic process (GO:0043436)	862	294	199.59	+	1.47	1.33E-08	1.32E-06
regulation of locomotion (GO:0040012)	1035	353	239.65	+	1.47	3.55E-10	4.52E-08
small molecule catabolic process (GO:0044282)	355	121	82.20	+	1.47	3.64E-04	1.12E-02
negative regulation of intracellular signal transduction (GO:1902532)	524	178	121.33	+	1.47	1.53E-05	7.35E-04
positive regulation of catabolic process (GO:0009896)	527	179	122.02	+	1.47	1.30E-05	6.42E-04
homeostasis of number of cells (GO:0048872)	271	92	62.75	+	1.47	1.82E-03	4.20E-02
organic acid metabolic process (GO:0006082)	869	295	201.21	+	1.47	1.86E-08	1.77E-06
regulation of endocytosis (GO:0030100)	292	99	67.61	+	1.46	1.35E-03	3.33E-02
regulation of transferase activity (GO:0051338)	847	287	196.12	+	1.46	3.07E-08	2.76E-06
positive regulation of transferase activity (GO:0051347)	523	177	121.10	+	1.46	1.86E-05	8.79E-04
regulation of neuron projection development (GO:0010975)	450	152	104.20	+	1.46	7.26E-05	2.93E-03
regulation of plasma membrane bounded cell projection organization (GO:0120035)	643	217	148.88	+	1.46	2.35E-06	1.37E-04
export from cell (GO:0140352)	481	162	111.37	+	1.45	5.12E-05	2.18E-03
negative regulation of cell migration (GO:0030336)	286	96	66.22	+	1.45	1.91E-03	4.37E-02
regulation of neuron death (GO:1901214)	292	98	67.61	+	1.45	2.08E-03	4.67E-02
organonitrogen compound catabolic process (GO:1901565)	1112	373	257.48	+	1.45	5.28E-10	6.56E-08
regulation of phosphorylation (GO:0042325)	1170	392	270.91	+	1.45	2.35E-10	3.12E-08
regulation of cell projection organization (GO:0031344)	657	220	152.13	+	1.45	2.94E-06	1.68E-04
macromolecule catabolic process (GO:0009057)	1007	335	233.17	+	1.44	1.04E-08	1.06E-06
import into cell (GO:0098657)	722	240	167.18	+	1.44	1.53E-06	9.33E-05
angiogenesis (GO:0001525)	340	113	78.73	+	1.44	1.03E-03	2.67E-02
cellular homeostasis (GO:0019725)	671	223	155.37	+	1.44	3.66E-06	2.02E-04
localization (GO:0051179)	4496	1493	1041.03	+	1.43	9.42E-42	2.09E-38
regulation of amide metabolic process (GO:0034248)	488	162	112.99	+	1.43	8.74E-05	3.38E-03
regulation of binding (GO:0051098)	371	123	85.90	+	1.43	7.21E-04	2.01E-02
wound healing (GO:0042060)	338	112	78.26	+	1.43	1.23E-03	3.08E-02
catabolic process (GO:0009056)	1977	654	457.77	+	1.43	4.00E-16	1.00E-13
negative regulation of programmed cell death (GO:0043069)	916	303	212.10	+	1.43	8.83E-08	6.85E-06
regulation of anatomical structure morphogenesis (GO:0022603)	871	288	201.68	+	1.43	1.90E-07	1.41E-05
regulation of intracellular signal transduction (GO:1902531)	1727	571	399.88	+	1.43	5.33E-14	1.09E-11
cellular response to abiotic stimulus (GO:0071214)	327	108	75.72	+	1.43	1.58E-03	3.75E-02
cellular response to environmental stimulus (GO:0104004)	327	108	75.72	+	1.43	1.58E-03	3.74E-02
positive regulation of kinase activity (GO:0033674)	430	142	99.56	+	1.43	3.41E-04	1.06E-02
establishment of localization (GO:0051234)	3934	1298	910.90	+	1.42	5.57E-34	5.76E-31
positive regulation of protein modification process (GO:0031401)	935	307	216.50	+	1.42	1.16E-07	8.96E-06
positive regulation of transport (GO:0051050)	921	302	213.25	+	1.42	1.72E-07	1.30E-05
negative regulation of apoptotic process (GO:0043066)	888	291	205.61	+	1.42	2.96E-07	2.13E-05
monocarboxylic acid metabolic process (GO:0032787)	522	171	120.87	+	1.41	9.63E-05	3.65E-03
negative regulation of protein metabolic process (GO:0051248)	986	323	228.30	+	1.41	7.06E-08	5.68E-06
response to wounding (GO:0009611)	456	149	105.59	+	1.41	3.31E-04	1.04E-02
protein modification process (GO:0036211)	2502	817	579.33	+	1.41	4.12E-19	1.33E-16
transport (GO:0006810)	3765	1229	871.77	+	1.41	3.72E-30	2.51E-27
regulation of translation (GO:0006417)	429	140	99.33	+	1.41	5.03E-04	1.47E-02
post-transcriptional regulation of gene expression (GO:0010608)	518	169	119.94	+	1.41	1.34E-04	4.92E-03
cellular catabolic process (GO:0044248)	1073	350	248.45	+	1.41	2.61E-08	2.38E-06
response to abiotic stimulus (GO:0009628)	1118	364	258.87	+	1.41	1.46E-08	1.44E-06
cellular component morphogenesis (GO:0032989)	618	200	143.10	+	1.40	4.95E-05	2.12E-03
organic substance catabolic process (GO:1901575)	1703	550	394.32	+	1.39	4.07E-12	6.95E-10
response to inorganic substance (GO:0010035)	539	174	124.80	+	1.39	1.75E-04	6.19E-03
response to organonitrogen compound (GO:0010243)	986	318	228.30	+	1.39	2.73E-07	1.98E-05
cell part morphogenesis (GO:0032990)	518	167	119.94	+	1.39	2.38E-04	8.06E-03
regulation of localization (GO:0032879)	2126	685	492.27	+	1.39	7.56E-15	1.73E-12
regulation of catalytic activity (GO:0050790)	1826	588	422.80	+	1.39	9.69E-13	1.73E-10
regulation of protein metabolic process (GO:0051246)	2461	792	569.84	+	1.39	3.44E-17	1.01E-14
blood vessel morphogenesis (GO:0048514)	432	139	100.03	+	1.39	9.27E-04	2.43E-02
organelle assembly (GO:0070925)	827	266	191.49	+	1.39	3.49E-06	1.94E-04
transmembrane receptor protein tyrosine kinase signaling pathway (GO:0007169)	423	136	97.94	+	1.39	1.00E-03	2.61E-02
positive regulation of protein metabolic process (GO:0051247)	1425	458	329.95	+	1.39	6.61E-10	8.15E-08
positive regulation of protein phosphorylation (GO:0001934)	711	228	164.63	+	1.38	2.41E-05	1.12E-03
blood vessel development (GO:0001568)	526	168	121.79	+	1.38	3.18E-04	9.99E-03
intracellular monoatomic cation homeostasis (GO:0030003)	426	136	98.64	+	1.38	1.26E-03	3.16E-02
cell morphogenesis (GO:0000902)	686	219	158.84	+	1.38	4.48E-05	1.95E-03
vasculature development (GO:0001944)	546	174	126.42	+	1.38	2.78E-04	9.06E-03
response to extracellular stimulus (GO:0009991)	509	162	117.86	+	1.37	5.35E-04	1.55E-02
secretion (GO:0046903)	535	170	123.88	+	1.37	4.20E-04	1.26E-02
positive regulation of catalytic activity (GO:0043085)	1111	353	257.25	+	1.37	1.88E-07	1.40E-05
response to growth factor (GO:0070848)	510	162	118.09	+	1.37	5.42E-04	1.56E-02
neuron projection morphogenesis (GO:0048812)	488	155	112.99	+	1.37	7.23E-04	2.01E-02
cellular component organization (GO:0016043)	5540	1759	1282.77	+	1.37	2.22E-41	4.30E-38
biosynthetic process (GO:0009058)	2637	837	610.59	+	1.37	6.15E-17	1.74E-14
organonitrogen compound metabolic process (GO:1901564)	4843	1537	1121.38	+	1.37	1.98E-34	2.20E-31
response to nutrient levels (GO:0031667)	479	152	110.91	+	1.37	7.87E-04	2.14E-02
intracellular chemical homeostasis (GO:0055082)	561	178	129.90	+	1.37	2.77E-04	9.06E-03
cell projection morphogenesis (GO:0048858)	498	158	115.31	+	1.37	6.77E-04	1.89E-02
response to nitrogen compound (GO:1901698)	1060	336	245.44	+	1.37	5.33E-07	3.65E-05
organic substance biosynthetic process (GO:1901576)	2574	815	596.00	+	1.37	3.19E-16	8.11E-14
plasma membrane bounded cell projection morphogenesis (GO:0120039)	493	156	114.15	+	1.37	7.68E-04	2.10E-02
apoptotic process (GO:0006915)	1045	330	241.97	+	1.36	9.23E-07	5.97E-05
cellular component assembly (GO:0022607)	2407	760	557.33	+	1.36	6.51E-15	1.53E-12
macromolecule modification (GO:0043412)	2716	857	628.88	+	1.36	7.89E-17	2.19E-14
regulation of transport (GO:0051049)	1771	558	410.07	+	1.36	8.22E-11	1.19E-08
cell death (GO:0008219)	1103	347	255.40	+	1.36	5.92E-07	3.99E-05
cellular response to nitrogen compound (GO:1901699)	633	199	146.57	+	1.36	2.10E-04	7.20E-03
intracellular monoatomic ion homeostasis (GO:0006873)	436	137	100.95	+	1.36	2.03E-03	4.60E-02
cell morphogenesis involved in differentiation (GO:0000904)	522	164	120.87	+	1.36	7.41E-04	2.04E-02
regulation of hydrolase activity (GO:0051336)	963	302	222.98	+	1.35	4.51E-06	2.42E-04
cellular response to growth factor stimulus (GO:0071363)	479	150	110.91	+	1.35	1.34E-03	3.33E-02
response to peptide (GO:1901652)	454	142	105.12	+	1.35	2.05E-03	4.65E-02
positive regulation of phosphorylation (GO:0042327)	771	241	178.52	+	1.35	5.55E-05	2.32E-03
programmed cell death (GO:0012501)	1091	341	252.62	+	1.35	1.24E-06	7.73E-05
response to radiation (GO:0009314)	445	139	103.04	+	1.35	2.24E-03	4.98E-02
positive regulation of intracellular signal transduction (GO:1902533)	1006	314	232.94	+	1.35	3.52E-06	1.95E-04
cellular response to organonitrogen compound (GO:0071417)	593	185	137.31	+	1.35	4.63E-04	1.37E-02
cell junction organization (GO:0034330)	531	165	122.95	+	1.34	1.14E-03	2.90E-02
cellular component organization or biogenesis (GO:0071840)	5754	1787	1332.32	+	1.34	2.75E-37	3.28E-34
protein metabolic process (GO:0019538)	3802	1179	880.34	+	1.34	9.05E-22	3.12E-19
positive regulation of phosphorus metabolic process (GO:0010562)	845	262	195.66	+	1.34	3.56E-05	1.61E-03
positive regulation of phosphate metabolic process (GO:0045937)	845	262	195.66	+	1.34	3.56E-05	1.60E-03
amide metabolic process (GO:0043603)	800	248	185.24	+	1.34	6.24E-05	2.56E-03
regulation of MAPK cascade (GO:0043408)	672	208	155.60	+	1.34	2.64E-04	8.74E-03
regulation of DNA metabolic process (GO:0051052)	531	164	122.95	+	1.33	1.36E-03	3.33E-02
regulation of apoptotic process (GO:0042981)	1467	453	339.68	+	1.33	5.14E-08	4.41E-06
circulatory system process (GO:0003013)	493	152	114.15	+	1.33	2.17E-03	4.87E-02
regulation of programmed cell death (GO:0043067)	1517	466	351.26	+	1.33	5.74E-08	4.79E-06
positive regulation of molecular function (GO:0044093)	1518	466	351.49	+	1.33	5.81E-08	4.82E-06
negative regulation of catalytic activity (GO:0043086)	630	193	145.87	+	1.32	7.75E-04	2.11E-02
amide biosynthetic process (GO:0043604)	543	166	125.73	+	1.32	1.80E-03	4.15E-02
peptidyl-amino acid modification (GO:0018193)	733	224	169.72	+	1.32	2.83E-04	9.15E-03
positive regulation of hydrolase activity (GO:0051345)	570	174	131.98	+	1.32	1.64E-03	3.89E-02
negative regulation of molecular function (GO:0044092)	973	296	225.29	+	1.31	3.58E-05	1.61E-03
negative regulation of signal transduction (GO:0009968)	1265	384	292.91	+	1.31	2.60E-06	1.51E-04
proteolysis (GO:0006508)	1282	389	296.84	+	1.31	2.19E-06	1.29E-04
regulation of molecular function (GO:0065009)	2565	778	593.92	+	1.31	4.40E-12	7.43E-10
neuron projection development (GO:0031175)	699	212	161.85	+	1.31	6.34E-04	1.79E-02
cellular biosynthetic process (GO:0044249)	2217	671	513.34	+	1.31	2.41E-10	3.18E-08
protein-containing complex assembly (GO:0065003)	1256	380	290.82	+	1.31	3.86E-06	2.11E-04
circulatory system development (GO:0072359)	926	280	214.41	+	1.31	8.46E-05	3.31E-03
chemical homeostasis (GO:0048878)	875	264	202.60	+	1.30	1.64E-04	5.87E-03
cell migration (GO:0016477)	891	268	206.31	+	1.30	1.61E-04	5.76E-03
regulation of signal transduction (GO:0009966)	2989	899	692.09	+	1.30	2.35E-13	4.41E-11
negative regulation of signaling (GO:0023057)	1361	409	315.13	+	1.30	2.55E-06	1.49E-04
cellular lipid metabolic process (GO:0044255)	916	275	212.10	+	1.30	1.66E-04	5.92E-03
positive regulation of signal transduction (GO:0009967)	1549	465	358.67	+	1.30	5.73E-07	3.90E-05
regulation of signaling (GO:0023051)	3392	1018	785.40	+	1.30	4.67E-15	1.13E-12
homeostatic process (GO:0042592)	1414	424	327.41	+	1.30	2.05E-06	1.22E-04
cellular component biogenesis (GO:0044085)	2655	796	614.76	+	1.29	1.62E-11	2.55E-09
negative regulation of cell communication (GO:0010648)	1360	407	314.90	+	1.29	3.96E-06	2.16E-04
cellular metabolic process (GO:0044237)	5808	1735	1344.82	+	1.29	5.23E-28	2.80E-25
regulation of cell communication (GO:0010646)	3401	1015	787.49	+	1.29	1.84E-14	4.15E-12
regulation of response to stress (GO:0080134)	1417	422	328.10	+	1.29	3.80E-06	2.09E-04
positive regulation of signaling (GO:0023056)	1725	513	399.42	+	1.28	3.30E-07	2.35E-05
response to stress (GO:0006950)	3419	1011	791.66	+	1.28	1.41E-13	2.67E-11
positive regulation of cell communication (GO:0010647)	1726	510	399.65	+	1.28	6.85E-07	4.57E-05
heterocycle biosynthetic process (GO:0018130)	1097	324	254.01	+	1.28	1.03E-04	3.88E-03
negative regulation of response to stimulus (GO:0048585)	1635	482	378.58	+	1.27	1.84E-06	1.11E-04
regulation of cell adhesion (GO:0030155)	785	231	181.76	+	1.27	1.38E-03	3.36E-02
cellular response to oxygen-containing compound (GO:1901701)	1146	337	265.35	+	1.27	9.34E-05	3.56E-03
protein modification by small protein conjugation or removal (GO:0070647)	854	251	197.74	+	1.27	9.31E-04	2.43E-02
neuron development (GO:0048666)	861	253	199.36	+	1.27	8.48E-04	2.29E-02
lipid metabolic process (GO:0006629)	1228	360	284.34	+	1.27	6.76E-05	2.74E-03
cellular nitrogen compound biosynthetic process (GO:0044271)	1623	474	375.80	+	1.26	5.21E-06	2.75E-04
primary metabolic process (GO:0044238)	7140	2085	1653.24	+	1.26	4.32E-31	3.53E-28
nitrogen compound metabolic process (GO:0006807)	6589	1924	1525.66	+	1.26	1.52E-27	7.89E-25
metabolic process (GO:0008152)	8056	2352	1865.34	+	1.26	1.08E-37	1.52E-34
regulation of biological quality (GO:0065008)	2928	854	677.97	+	1.26	2.56E-10	3.34E-08
head development (GO:0060322)	847	247	196.12	+	1.26	1.35E-03	3.32E-02
response to organic cyclic compound (GO:0014070)	871	253	201.68	+	1.25	1.54E-03	3.68E-02
protein-containing complex organization (GO:0043933)	1971	572	456.38	+	1.25	8.35E-07	5.47E-05
negative regulation of cellular process (GO:0048523)	4692	1359	1086.41	+	1.25	2.19E-16	5.76E-14
plasma membrane bounded cell projection organization (GO:0120036)	1147	331	265.58	+	1.25	3.56E-04	1.10E-02
aromatic compound biosynthetic process (GO:0019438)	1107	319	256.32	+	1.24	4.83E-04	1.42E-02
cellular response to endogenous stimulus (GO:0071495)	1201	346	278.09	+	1.24	2.84E-04	9.18E-03
organic substance metabolic process (GO:0071704)	7624	2196	1765.31	+	1.24	2.34E-30	1.65E-27
organic cyclic compound biosynthetic process (GO:1901362)	1230	354	284.80	+	1.24	2.56E-04	8.54E-03
response to endogenous stimulus (GO:0009719)	1464	421	338.98	+	1.24	6.70E-05	2.72E-03
transmembrane transport (GO:0055085)	1246	358	288.51	+	1.24	2.78E-04	9.06E-03
cell projection organization (GO:0030030)	1194	341	276.47	+	1.23	5.15E-04	1.50E-02
nucleobase-containing compound biosynthetic process (GO:0034654)	1026	293	237.57	+	1.23	1.43E-03	3.47E-02
negative regulation of biological process (GO:0048519)	5307	1514	1228.82	+	1.23	1.31E-16	3.49E-14
regulation of response to stimulus (GO:0048583)	3954	1126	915.53	+	1.23	1.45E-11	2.33E-09
neurogenesis (GO:0022008)	1318	374	305.18	+	1.23	3.94E-04	1.19E-02
response to oxygen-containing compound (GO:1901700)	1681	474	389.23	+	1.22	9.89E-05	3.74E-03
anatomical structure morphogenesis (GO:0009653)	2239	628	518.43	+	1.21	8.84E-06	4.50E-04
response to organic substance (GO:0010033)	2592	727	600.17	+	1.21	1.46E-06	8.95E-05
positive regulation of response to stimulus (GO:0048584)	2198	616	508.94	+	1.21	1.20E-05	5.95E-04
multicellular organism development (GO:0007275)	3959	1109	916.69	+	1.21	6.64E-10	8.12E-08
system development (GO:0048731)	3548	992	821.53	+	1.21	1.16E-08	1.17E-06
positive regulation of cellular process (GO:0048522)	5492	1533	1271.65	+	1.21	5.07E-14	1.05E-11
regulation of developmental process (GO:0050793)	2456	683	568.68	+	1.20	8.82E-06	4.51E-04
nervous system development (GO:0007399)	2230	618	516.35	+	1.20	3.69E-05	1.63E-03
macromolecule biosynthetic process (GO:0009059)	1517	420	351.26	+	1.20	8.70E-04	2.34E-02
cellular response to organic substance (GO:0071310)	1777	491	411.46	+	1.19	3.46E-04	1.08E-02
macromolecule metabolic process (GO:0043170)	5864	1620	1357.79	+	1.19	1.14E-13	2.25E-11
cellular response to chemical stimulus (GO:0070887)	2394	659	554.32	+	1.19	3.68E-05	1.64E-03
positive regulation of biological process (GO:0048518)	6198	1701	1435.12	+	1.19	1.21E-13	2.36E-11
negative regulation of metabolic process (GO:0009892)	2980	816	690.01	+	1.18	5.32E-06	2.79E-04
cellular nitrogen compound metabolic process (GO:0034641)	3334	910	771.98	+	1.18	1.94E-06	1.17E-04
negative regulation of cellular metabolic process (GO:0031324)	2212	602	512.18	+	1.18	2.28E-04	7.79E-03
heterocycle metabolic process (GO:0046483)	2960	804	685.38	+	1.17	1.73E-05	8.21E-04
nucleobase-containing compound metabolic process (GO:0006139)	2784	751	644.62	+	1.17	7.94E-05	3.14E-03
animal organ development (GO:0048513)	2920	784	676.11	+	1.16	8.22E-05	3.24E-03
cellular aromatic compound metabolic process (GO:0006725)	3002	805	695.10	+	1.16	7.46E-05	2.98E-03
anatomical structure development (GO:0048856)	5189	1389	1201.49	+	1.16	3.36E-08	2.98E-06
organic cyclic compound metabolic process (GO:1901360)	3244	866	751.14	+	1.15	5.97E-05	2.46E-03
cellular process (GO:0009987)	14613	3900	3383.59	+	1.15	2.62E-55	4.06E-51
cell development (GO:0048468)	2181	582	505.00	+	1.15	1.51E-03	3.59E-02
positive regulation of metabolic process (GO:0009893)	3814	1013	883.12	+	1.15	2.05E-05	9.61E-04
negative regulation of macromolecule metabolic process (GO:0010605)	2750	730	636.75	+	1.15	4.59E-04	1.36E-02
developmental process (GO:0032502)	5689	1507	1317.27	+	1.14	5.36E-08	4.55E-06
negative regulation of nitrogen compound metabolic process (GO:0051172)	2371	626	549.00	+	1.14	2.02E-03	4.60E-02
positive regulation of nitrogen compound metabolic process (GO:0051173)	3111	815	720.34	+	1.13	7.31E-04	2.02E-02
regulation of metabolic process (GO:0019222)	6691	1744	1549.28	+	1.13	8.45E-08	6.66E-06
positive regulation of macromolecule metabolic process (GO:0010604)	3503	913	811.11	+	1.13	5.09E-04	1.49E-02
cellular response to stimulus (GO:0051716)	6449	1656	1493.24	+	1.11	6.30E-06	3.28E-04
regulation of cellular metabolic process (GO:0031323)	5457	1396	1263.55	+	1.10	1.16E-04	4.31E-03
regulation of primary metabolic process (GO:0080090)	5801	1476	1343.20	+	1.10	1.43E-04	5.23E-03
regulation of nitrogen compound metabolic process (GO:0051171)	5622	1421	1301.75	+	1.09	5.70E-04	1.63E-02
biological_process (GO:0008150)	17714	4463	4101.61	+	1.09	2.00E-52	1.55E-48
regulation of macromolecule metabolic process (GO:0060255)	6161	1549	1426.56	+	1.09	5.42E-04	1.56E-02
regulation of biological process (GO:0050789)	11752	2941	2721.13	+	1.08	5.57E-09	6.05E-07
regulation of cellular process (GO:0050794)	10986	2749	2543.77	+	1.08	7.78E-08	6.23E-06
biological regulation (GO:0065007)	12172	3040	2818.38	+	1.08	3.16E-09	3.63E-07
response to stimulus (GO:0050896)	8207	2026	1900.30	+	1.07	8.83E-04	2.36E-02
regulation of RNA metabolic process (GO:0051252)	3743	773	866.68	-	.89	1.31E-03	3.26E-02
regulation of RNA biosynthetic process (GO:2001141)	3450	708	798.83	-	.89	1.31E-03	3.26E-02
regulation of DNA-templated transcription (GO:0006355)	3427	700	793.51	-	.88	9.33E-04	2.43E-02
system process (GO:0003008)	2066	399	478.37	-	.83	4.18E-04	1.25E-02
RNA metabolic process (GO:0016070)	1653	316	382.75	-	.83	1.06E-03	2.72E-02
regulation of transcription by RNA polymerase II (GO:0006357)	2582	477	597.85	-	.80	8.91E-07	5.79E-05
immune response (GO:0006955)	1635	265	378.58	-	.70	7.43E-09	7.80E-07
RNA processing (GO:0006396)	881	141	203.99	-	.69	1.72E-05	8.18E-04
mRNA processing (GO:0006397)	459	67	106.28	-	.63	2.36E-04	8.02E-03
RNA splicing (GO:0008380)	381	55	88.22	-	.62	6.47E-04	1.82E-02
nervous system process (GO:0050877)	1449	199	335.51	-	.59	4.01E-14	8.52E-12
ribosome biogenesis (GO:0042254)	310	42	71.78	-	.59	5.74E-04	1.64E-02
rRNA processing (GO:0006364)	217	27	50.25	-	.54	1.27E-03	3.18E-02
defense response to bacterium (GO:0042742)	299	37	69.23	-	.53	1.36E-04	4.99E-03
RNA splicing, via transesterification reactions (GO:0000375)	253	31	58.58	-	.53	4.12E-04	1.24E-02
mRNA splicing, via spliceosome (GO:0000398)	249	30	57.66	-	.52	2.81E-04	9.13E-03
RNA splicing, via transesterification reactions with bulged adenosine as nucleophile (GO:0000377)	249	30	57.66	-	.52	2.81E-04	9.11E-03
humoral immune response (GO:0006959)	255	28	59.04	-	.47	4.55E-05	1.98E-03
Unclassified (UNCLASSIFIED)	2878	305	666.39	-	.46	2.00E-52	1.03E-48
production of molecular mediator of immune response (GO:0002440)	144	15	33.34	-	.45	1.50E-03	3.60E-02
G protein-coupled receptor signaling pathway (GO:0007186)	1220	127	282.49	-	.45	2.48E-22	9.38E-20
immunoglobulin mediated immune response (GO:0016064)	173	18	40.06	-	.45	5.28E-04	1.53E-02
B cell mediated immunity (GO:0019724)	178	18	41.22	-	.44	3.07E-04	9.70E-03
cilium-dependent cell motility (GO:0060285)	134	13	31.03	-	.42	1.35E-03	3.32E-02
cilium or flagellum-dependent cell motility (GO:0001539)	134	13	31.03	-	.42	1.35E-03	3.32E-02
adaptive immune response (GO:0002250)	661	64	153.05	-	.42	4.60E-14	9.66E-12
antimicrobial humoral response (GO:0019730)	149	14	34.50	-	.41	3.91E-04	1.18E-02
sensory perception (GO:0007600)	982	90	227.38	-	.40	3.42E-22	1.27E-19
axoneme assembly (GO:0035082)	98	8	22.69	-	.35	1.68E-03	3.94E-02
ribosomal small subunit biogenesis (GO:0042274)	103	8	23.85	-	.34	8.90E-04	2.37E-02
detection of stimulus (GO:0051606)	676	50	156.53	-	.32	2.49E-20	8.22E-18
neuropeptide signaling pathway (GO:0007218)	113	8	26.16	-	.31	2.45E-04	8.26E-03
detection of stimulus involved in sensory perception (GO:0050906)	555	18	128.51	-	.14	1.88E-30	1.39E-27
detection of chemical stimulus (GO:0009593)	514	15	119.01	-	.13	1.25E-29	8.10E-27
sensory perception of taste (GO:0050909)	69	2	15.98	-	.13	9.75E-05	3.69E-03
sensory perception of bitter taste (GO:0050913)	44	1	10.19	-	.10	1.74E-03	4.04E-02
sensory perception of chemical stimulus (GO:0007606)	539	5	124.80	-	.04	8.61E-42	2.23E-38
sensory perception of smell (GO:0007608)	460	3	106.51	-	.03	1.65E-37	2.14E-34
detection of chemical stimulus involved in sensory perception of smell (GO:0050911)	433	1	100.26	-	< 0.01	4.14E-38	6.44E-35
detection of chemical stimulus involved in sensory perception (GO:0050907)	481	1	111.37	-	< 0.01	2.22E-42	6.88E-39
detection of chemical stimulus involved in sensory perception of bitter taste (GO:0001580)	39	0	9.03	-	< 0.01	6.20E-04	1.76E-02
detection of chemical stimulus involved in sensory perception of taste (GO:0050912)	45	0	10.42	-	< 0.01	1.55E-04	5.60E-03

## Sheet: Table S2 Up in wt 0.1 vs 10
Analysis Type:	PANTHER Overrepresentation Test (Released 20231017)
Annotation Version and Release Date:	GO Ontology database DOI: 10.5281/zenodo.7942786 Released 2023-01-05
Analyzed List:	upload_1 (Homo sapiens)
Reference List:	Homo sapiens (all genes in database)
Test Type:	FISHER
Correction:	FDR
GO biological process complete	Homo sapiens - REFLIST (20592)	upload_1 (142)	upload_1 (expected)	upload_1 (over/under)	upload_1 (fold Enrichment)	upload_1 (raw P-value)	upload_1 (FDR)
regulation of calcium-independent cell-cell adhesion (GO:0051040)	2	2	.01	+	> 100	2.77E-04	1.73E-02
negative regulation of beta-catenin-TCF complex assembly (GO:1904864)	2	2	.01	+	> 100	2.77E-04	1.72E-02
regulation of beta-catenin-TCF complex assembly (GO:1904863)	2	2	.01	+	> 100	2.77E-04	1.71E-02
renal vesicle induction (GO:0072034)	3	2	.02	+	96.68	4.60E-04	2.49E-02
regulation of branching involved in salivary gland morphogenesis by mesenchymal-epithelial signaling (GO:0060665)	3	2	.02	+	96.68	4.60E-04	2.48E-02
Harderian gland development (GO:0070384)	4	2	.03	+	72.51	6.86E-04	3.42E-02
paramesonephric duct development (GO:0061205)	4	2	.03	+	72.51	6.86E-04	3.40E-02
prostate gland morphogenetic growth (GO:0060737)	4	2	.03	+	72.51	6.86E-04	3.39E-02
lacrimal gland development (GO:0032808)	7	3	.05	+	62.15	3.64E-05	3.60E-03
mammary gland branching involved in pregnancy (GO:0060745)	7	3	.05	+	62.15	3.64E-05	3.58E-03
gastro-intestinal system smooth muscle contraction (GO:0014831)	7	3	.05	+	62.15	3.64E-05	3.56E-03
response to cortisol (GO:0051414)	5	2	.03	+	58.01	9.56E-04	4.37E-02
intestine smooth muscle contraction (GO:0014827)	5	2	.03	+	58.01	9.56E-04	4.35E-02
induction of positive chemotaxis (GO:0050930)	15	4	.10	+	38.67	7.55E-06	1.03E-03
branch elongation of an epithelium (GO:0060602)	16	4	.11	+	36.25	9.38E-06	1.20E-03
axis elongation (GO:0003401)	25	5	.17	+	29.00	1.74E-06	2.97E-04
positive regulation of positive chemotaxis (GO:0050927)	26	5	.18	+	27.89	2.07E-06	3.49E-04
positive regulation of animal organ morphogenesis (GO:0110110)	32	6	.22	+	27.19	2.14E-07	4.68E-05
organ induction (GO:0001759)	16	3	.11	+	27.19	2.81E-04	1.73E-02
neuroendocrine cell differentiation (GO:0061101)	16	3	.11	+	27.19	2.81E-04	1.72E-02
regulation of positive chemotaxis (GO:0050926)	27	5	.19	+	26.85	2.44E-06	4.02E-04
developmental induction (GO:0031128)	27	5	.19	+	26.85	2.44E-06	3.98E-04
branching involved in mammary gland duct morphogenesis (GO:0060444)	22	4	.15	+	26.37	2.80E-05	2.94E-03
negative regulation of fibroblast growth factor receptor signaling pathway (GO:0040037)	18	3	.12	+	24.17	3.82E-04	2.19E-02
white fat cell differentiation (GO:0050872)	18	3	.12	+	24.17	3.82E-04	2.18E-02
eosinophil chemotaxis (GO:0048245)	25	4	.17	+	23.20	4.38E-05	4.15E-03
positive regulation of myelination (GO:0031643)	19	3	.13	+	22.90	4.40E-04	2.42E-02
female genitalia development (GO:0030540)	19	3	.13	+	22.90	4.40E-04	2.42E-02
mammary gland duct morphogenesis (GO:0060603)	32	5	.22	+	22.66	5.13E-06	7.44E-04
eosinophil migration (GO:0072677)	26	4	.18	+	22.31	5.03E-05	4.49E-03
regulation of animal organ formation (GO:0003156)	27	4	.19	+	21.48	5.75E-05	5.01E-03
adrenal gland development (GO:0030325)	28	4	.19	+	20.72	6.53E-05	5.37E-03
phasic smooth muscle contraction (GO:0014821)	21	3	.14	+	20.72	5.73E-04	3.00E-02
negative regulation of stem cell proliferation (GO:2000647)	22	3	.15	+	19.77	6.48E-04	3.30E-02
positive regulation of transforming growth factor beta production (GO:0071636)	22	3	.15	+	19.77	6.48E-04	3.29E-02
regulation of insulin-like growth factor receptor signaling pathway (GO:0043567)	23	3	.16	+	18.91	7.29E-04	3.56E-02
negative regulation of cartilage development (GO:0061037)	31	4	.21	+	18.71	9.36E-05	7.27E-03
negative regulation of chemokine production (GO:0032682)	24	3	.17	+	18.13	8.15E-04	3.91E-02
postsynapse assembly (GO:0099068)	24	3	.17	+	18.13	8.15E-04	3.90E-02
prostate gland epithelium morphogenesis (GO:0060740)	24	3	.17	+	18.13	8.15E-04	3.88E-02
epithelial tube branching involved in lung morphogenesis (GO:0060441)	26	3	.18	+	16.73	1.01E-03	4.53E-02
cochlea morphogenesis (GO:0090103)	26	3	.18	+	16.73	1.01E-03	4.51E-02
prostate gland morphogenesis (GO:0060512)	26	3	.18	+	16.73	1.01E-03	4.50E-02
positive regulation of bone mineralization (GO:0030501)	44	5	.30	+	16.48	2.10E-05	2.31E-03
urogenital system development (GO:0001655)	64	7	.44	+	15.86	5.62E-07	1.05E-04
mammary gland morphogenesis (GO:0060443)	47	5	.32	+	15.43	2.82E-05	2.94E-03
smooth muscle cell differentiation (GO:0051145)	38	4	.26	+	15.26	1.93E-04	1.29E-02
positive chemotaxis (GO:0050918)	49	5	.34	+	14.80	3.39E-05	3.37E-03
lymphocyte chemotaxis (GO:0048247)	50	5	.34	+	14.50	3.71E-05	3.60E-03
regulation of transforming growth factor beta production (GO:0071634)	41	4	.28	+	14.15	2.53E-04	1.63E-02
exocrine system development (GO:0035272)	41	4	.28	+	14.15	2.53E-04	1.63E-02
regulation of activated T cell proliferation (GO:0046006)	42	4	.29	+	13.81	2.75E-04	1.72E-02
positive regulation of ossification (GO:0045778)	53	5	.37	+	13.68	4.80E-05	4.36E-03
positive regulation of glial cell differentiation (GO:0045687)	43	4	.30	+	13.49	2.99E-04	1.79E-02
ERK1 and ERK2 cascade (GO:0070371)	54	5	.37	+	13.43	5.22E-05	4.61E-03
positive regulation of biomineral tissue development (GO:0070169)	54	5	.37	+	13.43	5.22E-05	4.58E-03
prostate gland development (GO:0030850)	46	4	.32	+	12.61	3.80E-04	2.19E-02
mesonephros development (GO:0001823)	93	8	.64	+	12.47	4.69E-07	9.00E-05
semi-lunar valve development (GO:1905314)	47	4	.32	+	12.34	4.10E-04	2.29E-02
digestive tract morphogenesis (GO:0048546)	48	4	.33	+	12.08	4.42E-04	2.42E-02
positive regulation of endothelial cell proliferation (GO:0001938)	97	8	.67	+	11.96	6.33E-07	1.17E-04
regulation of cartilage development (GO:0061035)	73	6	.50	+	11.92	1.71E-05	2.01E-03
negative regulation of epithelial cell differentiation (GO:0030857)	49	4	.34	+	11.84	4.76E-04	2.54E-02
mammary gland epithelium development (GO:0061180)	62	5	.43	+	11.69	9.64E-05	7.41E-03
regulation of animal organ morphogenesis (GO:2000027)	129	10	.89	+	11.24	4.14E-08	1.29E-05
regulation of morphogenesis of an epithelium (GO:1905330)	65	5	.45	+	11.15	1.19E-04	8.79E-03
lymphocyte migration (GO:0072676)	78	6	.54	+	11.15	2.43E-05	2.59E-03
cochlea development (GO:0090102)	52	4	.36	+	11.15	5.88E-04	3.06E-02
regulation of morphogenesis of a branching structure (GO:0060688)	52	4	.36	+	11.15	5.88E-04	3.05E-02
regulation of bone mineralization (GO:0030500)	79	6	.54	+	11.01	2.60E-05	2.75E-03
cellular response to retinoic acid (GO:0071300)	67	5	.46	+	10.82	1.36E-04	9.86E-03
epithelial to mesenchymal transition (GO:0001837)	82	6	.57	+	10.61	3.17E-05	3.24E-03
positive regulation of leukocyte chemotaxis (GO:0002690)	99	7	.68	+	10.25	8.44E-06	1.10E-03
ureteric bud morphogenesis (GO:0060675)	57	4	.39	+	10.18	8.13E-04	3.91E-02
stem cell proliferation (GO:0072089)	72	5	.50	+	10.07	1.87E-04	1.26E-02
mesonephric tubule morphogenesis (GO:0072171)	58	4	.40	+	10.00	8.65E-04	4.02E-02
ureteric bud development (GO:0001657)	88	6	.61	+	9.89	4.61E-05	4.26E-03
positive regulation of chemotaxis (GO:0050921)	147	10	1.01	+	9.86	1.31E-07	3.09E-05
bone mineralization (GO:0030282)	59	4	.41	+	9.83	9.18E-04	4.24E-02
mesonephric tubule development (GO:0072164)	89	6	.61	+	9.78	4.89E-05	4.42E-03
mesonephric epithelium development (GO:0072163)	89	6	.61	+	9.78	4.89E-05	4.39E-03
positive regulation of mononuclear cell migration (GO:0071677)	75	5	.52	+	9.67	2.23E-04	1.48E-02
ovulation cycle (GO:0042698)	75	5	.52	+	9.67	2.23E-04	1.47E-02
regulation of ossification (GO:0030278)	120	8	.83	+	9.67	2.84E-06	4.55E-04
collagen fibril organization (GO:0030199)	60	4	.41	+	9.67	9.74E-04	4.42E-02
smooth muscle contraction (GO:0006939)	61	4	.42	+	9.51	1.03E-03	4.58E-02
maternal process involved in female pregnancy (GO:0060135)	61	4	.42	+	9.51	1.03E-03	4.57E-02
embryonic digit morphogenesis (GO:0042733)	61	4	.42	+	9.51	1.03E-03	4.56E-02
tissue regeneration (GO:0042246)	61	4	.42	+	9.51	1.03E-03	4.54E-02
heart valve morphogenesis (GO:0003179)	61	4	.42	+	9.51	1.03E-03	4.53E-02
negative regulation of transforming growth factor beta receptor signaling pathway (GO:0030512)	94	6	.65	+	9.26	6.52E-05	5.39E-03
hair follicle development (GO:0001942)	80	5	.55	+	9.06	2.97E-04	1.79E-02
regulation of stem cell proliferation (GO:0072091)	80	5	.55	+	9.06	2.97E-04	1.79E-02
response to retinoic acid (GO:0032526)	112	7	.77	+	9.06	1.80E-05	2.07E-03
regulation of leukocyte chemotaxis (GO:0002688)	128	8	.88	+	9.06	4.47E-06	6.80E-04
female sex differentiation (GO:0046660)	116	7	.80	+	8.75	2.23E-05	2.41E-03
regulation of biomineral tissue development (GO:0070167)	100	6	.69	+	8.70	9.03E-05	7.04E-03
positive regulation of leukocyte migration (GO:0002687)	151	9	1.04	+	8.64	1.61E-06	2.78E-04
hair cycle process (GO:0022405)	84	5	.58	+	8.63	3.67E-04	2.14E-02
molting cycle process (GO:0022404)	84	5	.58	+	8.63	3.67E-04	2.14E-02
branching morphogenesis of an epithelial tube (GO:0048754)	137	8	.94	+	8.47	7.18E-06	9.96E-04
negative regulation of canonical Wnt signaling pathway (GO:0090090)	138	8	.95	+	8.41	7.55E-06	1.02E-03
regulation of endothelial cell proliferation (GO:0001936)	140	8	.97	+	8.29	8.35E-06	1.10E-03
metanephros development (GO:0001656)	88	5	.61	+	8.24	4.50E-04	2.45E-02
chondrocyte differentiation (GO:0002062)	88	5	.61	+	8.24	4.50E-04	2.44E-02
canonical Wnt signaling pathway (GO:0060070)	106	6	.73	+	8.21	1.22E-04	9.01E-03
gland morphogenesis (GO:0022612)	106	6	.73	+	8.21	1.22E-04	8.97E-03
regulation of mononuclear cell migration (GO:0071675)	124	7	.86	+	8.19	3.35E-05	3.36E-03
positive regulation of canonical Wnt signaling pathway (GO:0090263)	107	6	.74	+	8.13	1.29E-04	9.37E-03
kidney morphogenesis (GO:0060993)	90	5	.62	+	8.06	4.96E-04	2.61E-02
inner ear morphogenesis (GO:0042472)	109	6	.75	+	7.98	1.42E-04	1.01E-02
mononuclear cell migration (GO:0071674)	110	6	.76	+	7.91	1.48E-04	1.05E-02
morphogenesis of a branching epithelium (GO:0061138)	165	9	1.14	+	7.91	3.22E-06	5.11E-04
mammary gland development (GO:0030879)	129	7	.89	+	7.87	4.26E-05	4.06E-03
ear morphogenesis (GO:0042471)	130	7	.90	+	7.81	4.47E-05	4.18E-03
endocrine system development (GO:0035270)	131	7	.90	+	7.75	4.68E-05	4.30E-03
mesenchymal cell differentiation (GO:0048762)	171	9	1.18	+	7.63	4.25E-06	6.67E-04
negative regulation of Wnt signaling pathway (GO:0030178)	172	9	1.19	+	7.59	4.45E-06	6.84E-04
cell-cell signaling by wnt (GO:0198738)	287	15	1.98	+	7.58	2.59E-09	1.68E-06
Wnt signaling pathway (GO:0016055)	287	15	1.98	+	7.58	2.59E-09	1.61E-06
skin epidermis development (GO:0098773)	115	6	.79	+	7.57	1.87E-04	1.25E-02
ear development (GO:0043583)	230	12	1.59	+	7.57	1.11E-07	2.74E-05
regeneration (GO:0031099)	155	8	1.07	+	7.48	1.69E-05	2.00E-03
hair cycle (GO:0042633)	97	5	.67	+	7.47	6.87E-04	3.38E-02
molting cycle (GO:0042303)	97	5	.67	+	7.47	6.87E-04	3.37E-02
morphogenesis of a branching structure (GO:0001763)	175	9	1.21	+	7.46	5.09E-06	7.45E-04
regulation of canonical Wnt signaling pathway (GO:0060828)	256	13	1.77	+	7.36	4.34E-08	1.32E-05
developmental growth involved in morphogenesis (GO:0060560)	138	7	.95	+	7.36	6.40E-05	5.38E-03
regulation of epithelial cell apoptotic process (GO:1904035)	99	5	.68	+	7.32	7.50E-04	3.64E-02
kidney epithelium development (GO:0072073)	140	7	.97	+	7.25	6.98E-05	5.65E-03
regulation of transforming growth factor beta receptor signaling pathway (GO:0017015)	140	7	.97	+	7.25	6.98E-05	5.62E-03
kidney development (GO:0001822)	303	15	2.09	+	7.18	5.21E-09	2.45E-06
development of primary female sexual characteristics (GO:0046545)	101	5	.70	+	7.18	8.17E-04	3.87E-02
regulation of cellular response to transforming growth factor beta stimulus (GO:1903844)	143	7	.99	+	7.10	7.93E-05	6.35E-03
positive regulation of Wnt signaling pathway (GO:0030177)	144	7	.99	+	7.05	8.27E-05	6.59E-03
negative regulation of transmembrane receptor protein serine/threonine kinase signaling pathway (GO:0090101)	145	7	1.00	+	7.00	8.62E-05	6.83E-03
digestive system development (GO:0055123)	145	7	1.00	+	7.00	8.62E-05	6.80E-03
regulation of chemotaxis (GO:0050920)	228	11	1.57	+	7.00	8.03E-07	1.47E-04
biomineral tissue development (GO:0031214)	104	5	.72	+	6.97	9.27E-04	4.26E-02
regulation of leukocyte migration (GO:0002685)	229	11	1.58	+	6.97	8.36E-07	1.49E-04
renal system development (GO:0072001)	313	15	2.16	+	6.95	7.91E-09	3.41E-06
positive regulation of epithelial cell proliferation (GO:0050679)	209	10	1.44	+	6.94	2.78E-06	4.49E-04
extracellular matrix organization (GO:0030198)	275	13	1.90	+	6.86	9.63E-08	2.53E-05
regulation of osteoblast differentiation (GO:0045667)	127	6	.88	+	6.85	3.12E-04	1.86E-02
extracellular structure organization (GO:0043062)	276	13	1.90	+	6.83	1.00E-07	2.55E-05
leukocyte chemotaxis (GO:0030595)	149	7	1.03	+	6.81	1.01E-04	7.72E-03
limb morphogenesis (GO:0035108)	149	7	1.03	+	6.81	1.01E-04	7.68E-03
appendage morphogenesis (GO:0035107)	149	7	1.03	+	6.81	1.01E-04	7.65E-03
external encapsulating structure organization (GO:0045229)	278	13	1.92	+	6.78	1.09E-07	2.72E-05
odontogenesis (GO:0042476)	129	6	.89	+	6.74	3.38E-04	2.00E-02
nephron epithelium development (GO:0072009)	109	5	.75	+	6.65	1.13E-03	4.92E-02
digestive tract development (GO:0048565)	133	6	.92	+	6.54	3.95E-04	2.22E-02
gliogenesis (GO:0042063)	266	12	1.83	+	6.54	4.93E-07	9.34E-05
regulation of Wnt signaling pathway (GO:0030111)	334	15	2.30	+	6.51	1.81E-08	6.70E-06
inner ear development (GO:0048839)	202	9	1.39	+	6.46	1.53E-05	1.84E-03
liver development (GO:0001889)	135	6	.93	+	6.45	4.26E-04	2.36E-02
cell surface receptor signaling pathway involved in cell-cell signaling (GO:1905114)	363	16	2.50	+	6.39	7.59E-09	3.37E-06
glial cell differentiation (GO:0010001)	206	9	1.42	+	6.34	1.78E-05	2.08E-03
nephron development (GO:0072006)	138	6	.95	+	6.30	4.77E-04	2.54E-02
hepaticobiliary system development (GO:0061008)	138	6	.95	+	6.30	4.77E-04	2.53E-02
positive regulation of leukocyte proliferation (GO:0070665)	165	7	1.14	+	6.15	1.86E-04	1.26E-02
gland development (GO:0048732)	425	18	2.93	+	6.14	1.50E-09	1.06E-06
cell chemotaxis (GO:0060326)	214	9	1.48	+	6.10	2.37E-05	2.54E-03
positive regulation of neurogenesis (GO:0050769)	240	10	1.66	+	6.04	8.95E-06	1.16E-03
regulation of cellular response to growth factor stimulus (GO:0090287)	313	13	2.16	+	6.02	3.99E-07	7.95E-05
positive regulation of lymphocyte proliferation (GO:0050671)	145	6	1.00	+	6.00	6.13E-04	3.16E-02
positive regulation of mononuclear cell proliferation (GO:0032946)	148	6	1.02	+	5.88	6.79E-04	3.39E-02
female pregnancy (GO:0007565)	174	7	1.20	+	5.83	2.54E-04	1.63E-02
regulation of transmembrane receptor protein serine/threonine kinase signaling pathway (GO:0090092)	275	11	1.90	+	5.80	4.58E-06	6.77E-04
regulation of nervous system process (GO:0031644)	151	6	1.04	+	5.76	7.52E-04	3.64E-02
regulation of epithelial cell differentiation (GO:0030856)	154	6	1.06	+	5.65	8.30E-04	3.89E-02
positive regulation of neuron projection development (GO:0010976)	155	6	1.07	+	5.61	8.57E-04	4.00E-02
positive regulation of peptidyl-tyrosine phosphorylation (GO:0050731)	181	7	1.25	+	5.61	3.20E-04	1.90E-02
cellular response to transforming growth factor beta stimulus (GO:0071560)	156	6	1.08	+	5.58	8.85E-04	4.10E-02
negative regulation of cell migration (GO:0030336)	286	11	1.97	+	5.58	6.55E-06	9.16E-04
positive regulation of nervous system development (GO:0051962)	289	11	1.99	+	5.52	7.20E-06	9.90E-04
regulation of epithelial cell proliferation (GO:0050678)	372	14	2.57	+	5.46	4.40E-07	8.55E-05
limb development (GO:0060173)	187	7	1.29	+	5.43	3.87E-04	2.19E-02
appendage development (GO:0048736)	187	7	1.29	+	5.43	3.87E-04	2.18E-02
positive regulation of ERK1 and ERK2 cascade (GO:0070374)	215	8	1.48	+	5.40	1.54E-04	1.08E-02
mesenchyme development (GO:0060485)	243	9	1.68	+	5.37	6.15E-05	5.19E-03
response to transforming growth factor beta (GO:0071559)	163	6	1.12	+	5.34	1.10E-03	4.80E-02
leukocyte migration (GO:0050900)	245	9	1.69	+	5.33	6.54E-05	5.34E-03
negative regulation of cell motility (GO:2000146)	301	11	2.08	+	5.30	1.04E-05	1.30E-03
multi-organism reproductive process (GO:0044703)	195	7	1.34	+	5.21	4.93E-04	2.60E-02
growth (GO:0040007)	419	15	2.89	+	5.19	3.09E-07	6.40E-05
developmental growth (GO:0048589)	419	15	2.89	+	5.19	3.09E-07	6.31E-05
sex differentiation (GO:0007548)	285	10	1.97	+	5.09	3.71E-05	3.58E-03
development of primary sexual characteristics (GO:0045137)	234	8	1.61	+	4.96	2.69E-04	1.69E-02
multi-multicellular organism process (GO:0044706)	205	7	1.41	+	4.95	6.56E-04	3.32E-02
positive regulation of cell migration (GO:0030335)	534	18	3.68	+	4.89	4.51E-08	1.35E-05
reproductive structure development (GO:0048608)	301	10	2.08	+	4.82	5.79E-05	5.02E-03
embryonic organ morphogenesis (GO:0048562)	301	10	2.08	+	4.82	5.79E-05	4.99E-03
regulation of ERK1 and ERK2 cascade (GO:0070372)	301	10	2.08	+	4.82	5.79E-05	4.97E-03
positive regulation of locomotion (GO:0040017)	575	19	3.97	+	4.79	2.50E-08	8.64E-06
reproductive system development (GO:0061458)	305	10	2.10	+	4.75	6.44E-05	5.35E-03
chemotaxis (GO:0006935)	521	17	3.59	+	4.73	1.72E-07	3.92E-05
negative regulation of locomotion (GO:0040013)	338	11	2.33	+	4.72	2.94E-05	3.04E-03
regulation of peptidyl-tyrosine phosphorylation (GO:0050730)	246	8	1.70	+	4.72	3.72E-04	2.15E-02
taxis (GO:0042330)	523	17	3.61	+	4.71	1.81E-07	4.07E-05
sensory organ morphogenesis (GO:0090596)	278	9	1.92	+	4.69	1.65E-04	1.13E-02
angiogenesis (GO:0001525)	340	11	2.34	+	4.69	3.10E-05	3.18E-03
blood vessel development (GO:0001568)	526	17	3.63	+	4.69	1.96E-07	4.34E-05
tube morphogenesis (GO:0035239)	683	22	4.71	+	4.67	2.76E-09	1.59E-06
positive regulation of cell motility (GO:2000147)	559	18	3.85	+	4.67	8.76E-08	2.35E-05
embryonic morphogenesis (GO:0048598)	591	19	4.08	+	4.66	3.81E-08	1.21E-05
regulation of cell-substrate adhesion (GO:0010810)	219	7	1.51	+	4.64	9.55E-04	4.37E-02
locomotion (GO:0040011)	542	17	3.74	+	4.55	2.94E-07	6.17E-05
vasculature development (GO:0001944)	546	17	3.77	+	4.52	3.25E-07	6.56E-05
regulation of neurogenesis (GO:0050767)	386	12	2.66	+	4.51	1.96E-05	2.19E-03
positive regulation of cell projection organization (GO:0031346)	354	11	2.44	+	4.51	4.42E-05	4.16E-03
cell fate commitment (GO:0045165)	258	8	1.78	+	4.50	5.04E-04	2.65E-02
regulation of vasculature development (GO:1901342)	291	9	2.01	+	4.48	2.29E-04	1.50E-02
blood vessel morphogenesis (GO:0048514)	432	13	2.98	+	4.36	1.22E-05	1.51E-03
regulation of nervous system development (GO:0051960)	466	14	3.21	+	4.36	5.65E-06	8.05E-04
regulation of leukocyte proliferation (GO:0070663)	268	8	1.85	+	4.33	6.43E-04	3.29E-02
muscle cell differentiation (GO:0042692)	269	8	1.85	+	4.31	6.58E-04	3.32E-02
positive regulation of cell development (GO:0010720)	441	13	3.04	+	4.27	1.51E-05	1.83E-03
cell-cell signaling (GO:0007267)	1091	32	7.52	+	4.25	3.98E-12	6.87E-09
positive regulation of GTPase activity (GO:0043547)	275	8	1.90	+	4.22	7.56E-04	3.65E-02
negative regulation of cell development (GO:0010721)	279	8	1.92	+	4.16	8.28E-04	3.91E-02
learning or memory (GO:0007611)	279	8	1.92	+	4.16	8.28E-04	3.90E-02
epithelial tube morphogenesis (GO:0060562)	316	9	2.18	+	4.13	4.12E-04	2.30E-02
embryonic organ development (GO:0048568)	458	13	3.16	+	4.12	2.21E-05	2.40E-03
negative regulation of cell population proliferation (GO:0008285)	708	20	4.88	+	4.10	1.26E-07	3.00E-05
cognition (GO:0050890)	321	9	2.21	+	4.07	4.61E-04	2.47E-02
regulation of angiogenesis (GO:0045765)	287	8	1.98	+	4.04	9.89E-04	4.48E-02
tube development (GO:0035295)	899	25	6.20	+	4.03	3.69E-09	1.85E-06
negative regulation of cell adhesion (GO:0007162)	290	8	2.00	+	4.00	1.06E-03	4.62E-02
regulation of anatomical structure morphogenesis (GO:0022603)	871	24	6.01	+	4.00	9.40E-09	3.95E-06
regulation of cell migration (GO:0030334)	932	25	6.43	+	3.89	7.45E-09	3.40E-06
cytokine-mediated signaling pathway (GO:0019221)	373	10	2.57	+	3.89	3.15E-04	1.87E-02
regulation of cell development (GO:0060284)	829	22	5.72	+	3.85	7.99E-08	2.18E-05
positive regulation of cell population proliferation (GO:0008284)	946	25	6.52	+	3.83	9.94E-09	4.06E-06
regulation of actin cytoskeleton organization (GO:0032956)	343	9	2.37	+	3.81	7.31E-04	3.56E-02
regulation of locomotion (GO:0040012)	1035	27	7.14	+	3.78	3.03E-09	1.68E-06
circulatory system development (GO:0072359)	926	24	6.39	+	3.76	2.93E-08	9.49E-06
regulation of multicellular organismal development (GO:2000026)	1400	36	9.65	+	3.73	5.58E-12	8.67E-09
sensory organ development (GO:0007423)	591	15	4.08	+	3.68	1.82E-05	2.08E-03
regulation of cell motility (GO:2000145)	990	25	6.83	+	3.66	2.38E-08	8.40E-06
regulation of cell population proliferation (GO:0042127)	1670	42	11.52	+	3.65	1.13E-13	4.38E-10
cellular response to growth factor stimulus (GO:0071363)	479	12	3.30	+	3.63	1.46E-04	1.04E-02
cell adhesion (GO:0007155)	966	24	6.66	+	3.60	6.37E-08	1.80E-05
cellular response to lipid (GO:0071396)	527	13	3.63	+	3.58	8.95E-05	7.02E-03
regulation of GTPase activity (GO:0043087)	366	9	2.52	+	3.57	1.14E-03	4.93E-02
regulation of neuron projection development (GO:0010975)	450	11	3.10	+	3.54	3.41E-04	2.00E-02
positive regulation of response to external stimulus (GO:0032103)	532	13	3.67	+	3.54	9.81E-05	7.50E-03
positive regulation of developmental process (GO:0051094)	1318	32	9.09	+	3.52	4.53E-10	3.70E-07
response to wounding (GO:0009611)	456	11	3.14	+	3.50	3.80E-04	2.19E-02
negative regulation of cell differentiation (GO:0045596)	666	16	4.59	+	3.48	1.83E-05	2.07E-03
morphogenesis of an epithelium (GO:0002009)	458	11	3.16	+	3.48	3.94E-04	2.22E-02
anatomical structure formation involved in morphogenesis (GO:0048646)	959	23	6.61	+	3.48	2.29E-07	4.94E-05
muscle structure development (GO:0061061)	503	12	3.47	+	3.46	2.27E-04	1.49E-02
skeletal system development (GO:0001501)	504	12	3.48	+	3.45	2.31E-04	1.50E-02
transmembrane receptor protein tyrosine kinase signaling pathway (GO:0007169)	423	10	2.92	+	3.43	8.16E-04	3.88E-02
response to growth factor (GO:0070848)	510	12	3.52	+	3.41	2.57E-04	1.64E-02
positive regulation of cellular component biogenesis (GO:0044089)	510	12	3.52	+	3.41	2.57E-04	1.63E-02
positive regulation of cell differentiation (GO:0045597)	857	20	5.91	+	3.38	2.31E-06	3.86E-04
regulation of plasma membrane bounded cell projection organization (GO:0120035)	643	15	4.43	+	3.38	4.69E-05	4.29E-03
cell population proliferation (GO:0008283)	729	17	5.03	+	3.38	1.43E-05	1.76E-03
axon development (GO:0061564)	430	10	2.97	+	3.37	9.22E-04	4.25E-02
inflammatory response (GO:0006954)	560	13	3.86	+	3.37	1.61E-04	1.12E-02
animal organ morphogenesis (GO:0009887)	991	23	6.83	+	3.37	4.03E-07	7.91E-05
regulation of cell adhesion (GO:0030155)	785	18	5.41	+	3.33	9.80E-06	1.24E-03
negative regulation of signal transduction (GO:0009968)	1265	29	8.72	+	3.32	1.22E-08	4.63E-06
regulation of cell projection organization (GO:0031344)	657	15	4.53	+	3.31	5.95E-05	5.08E-03
positive regulation of MAPK cascade (GO:0043410)	483	11	3.33	+	3.30	6.07E-04	3.14E-02
positive regulation of cell adhesion (GO:0045785)	484	11	3.34	+	3.30	6.17E-04	3.17E-02
positive regulation of multicellular organismal process (GO:0051240)	1651	37	11.39	+	3.25	1.29E-10	1.34E-07
response to lipid (GO:0033993)	854	19	5.89	+	3.23	8.26E-06	1.10E-03
negative regulation of multicellular organismal process (GO:0051241)	1125	25	7.76	+	3.22	2.61E-07	5.54E-05
regulation of leukocyte activation (GO:0002694)	593	13	4.09	+	3.18	2.77E-04	1.71E-02
enzyme-linked receptor protein signaling pathway (GO:0007167)	639	14	4.41	+	3.18	1.61E-04	1.11E-02
embryo development (GO:0009790)	1054	23	7.27	+	3.16	1.14E-06	1.99E-04
cell surface receptor signaling pathway (GO:0007166)	2090	45	14.41	+	3.12	2.40E-12	4.65E-09
cell migration (GO:0016477)	891	19	6.14	+	3.09	1.48E-05	1.81E-03
negative regulation of cell communication (GO:0010648)	1360	29	9.38	+	3.09	5.75E-08	1.68E-05
negative regulation of signaling (GO:0023057)	1361	29	9.39	+	3.09	5.84E-08	1.68E-05
regulation of multicellular organismal process (GO:0051239)	2975	63	20.52	+	3.07	1.42E-17	2.20E-13
tissue morphogenesis (GO:0048729)	570	12	3.93	+	3.05	6.78E-04	3.41E-02
positive regulation of hydrolase activity (GO:0051345)	570	12	3.93	+	3.05	6.78E-04	3.40E-02
behavior (GO:0007610)	622	13	4.29	+	3.03	4.33E-04	2.39E-02
regulation of MAPK cascade (GO:0043408)	672	14	4.63	+	3.02	2.68E-04	1.69E-02
negative regulation of developmental process (GO:0051093)	915	19	6.31	+	3.01	2.12E-05	2.32E-03
regulation of response to external stimulus (GO:0032101)	1062	22	7.32	+	3.00	4.57E-06	6.83E-04
regulation of cell differentiation (GO:0045595)	1554	32	10.72	+	2.99	2.27E-08	8.21E-06
anatomical structure morphogenesis (GO:0009653)	2239	45	15.44	+	2.91	2.41E-11	3.12E-08
epithelium development (GO:0060429)	1097	22	7.56	+	2.91	7.57E-06	1.01E-03
regulation of cell activation (GO:0050865)	650	13	4.48	+	2.90	6.47E-04	3.31E-02
regulation of hydrolase activity (GO:0051336)	963	19	6.64	+	2.86	4.20E-05	4.02E-03
positive regulation of protein phosphorylation (GO:0001934)	711	14	4.90	+	2.86	4.66E-04	2.49E-02
negative regulation of response to stimulus (GO:0048585)	1635	32	11.27	+	2.84	7.27E-08	2.02E-05
cellular response to endogenous stimulus (GO:0071495)	1201	23	8.28	+	2.78	9.58E-06	1.22E-03
response to endogenous stimulus (GO:0009719)	1464	28	10.10	+	2.77	8.87E-07	1.57E-04
neurogenesis (GO:0022008)	1318	25	9.09	+	2.75	4.36E-06	6.77E-04
cell motility (GO:0048870)	1055	20	7.28	+	2.75	4.49E-05	4.17E-03
tissue development (GO:0009888)	1747	33	12.05	+	2.74	9.83E-08	2.54E-05
positive regulation of cellular component organization (GO:0051130)	1118	21	7.71	+	2.72	3.24E-05	3.27E-03
regulation of developmental process (GO:0050793)	2456	46	16.94	+	2.72	1.40E-10	1.36E-07
regulation of cellular component biogenesis (GO:0044087)	967	18	6.67	+	2.70	1.39E-04	1.01E-02
neuron development (GO:0048666)	861	16	5.94	+	2.69	3.41E-04	2.00E-02
cellular response to organic substance (GO:0071310)	1777	33	12.25	+	2.69	1.45E-07	3.37E-05
neuron differentiation (GO:0030182)	1078	20	7.43	+	2.69	6.02E-05	5.11E-03
positive regulation of immune system process (GO:0002684)	973	18	6.71	+	2.68	1.50E-04	1.06E-02
positive regulation of phosphorylation (GO:0042327)	771	14	5.32	+	2.63	1.01E-03	4.49E-02
system development (GO:0048731)	3548	64	24.47	+	2.62	1.70E-14	8.81E-11
nervous system development (GO:0007399)	2230	40	15.38	+	2.60	1.16E-08	4.63E-06
central nervous system development (GO:0007417)	1069	19	7.37	+	2.58	1.62E-04	1.11E-02
regulation of protein phosphorylation (GO:0001932)	1071	19	7.39	+	2.57	1.66E-04	1.13E-02
head development (GO:0060322)	847	15	5.84	+	2.57	8.53E-04	3.99E-02
multicellular organism development (GO:0007275)	3959	69	27.30	+	2.53	4.06E-15	3.15E-11
generation of neurons (GO:0048699)	1148	20	7.92	+	2.53	1.40E-04	9.99E-03
response to organic cyclic compound (GO:0014070)	871	15	6.01	+	2.50	1.12E-03	4.89E-02
cellular response to chemical stimulus (GO:0070887)	2394	41	16.51	+	2.48	2.63E-08	8.87E-06
animal organ development (GO:0048513)	2920	50	20.14	+	2.48	3.62E-10	3.12E-07
regulation of phosphorylation (GO:0042325)	1170	20	8.07	+	2.48	1.79E-04	1.21E-02
regulation of immune system process (GO:0002682)	1484	25	10.23	+	2.44	3.18E-05	3.23E-03
negative regulation of gene expression (GO:0010629)	954	16	6.58	+	2.43	1.01E-03	4.54E-02
regulation of phosphate metabolic process (GO:0019220)	1314	22	9.06	+	2.43	1.11E-04	8.25E-03
regulation of phosphorus metabolic process (GO:0051174)	1315	22	9.07	+	2.43	1.12E-04	8.30E-03
response to oxygen-containing compound (GO:1901700)	1681	28	11.59	+	2.42	1.68E-05	2.00E-03
cellular response to oxygen-containing compound (GO:1901701)	1146	19	7.90	+	2.40	3.83E-04	2.18E-02
positive regulation of gene expression (GO:0010628)	1171	19	8.08	+	2.35	7.17E-04	3.51E-02
regulation of signal transduction (GO:0009966)	2989	48	20.61	+	2.33	1.20E-08	4.64E-06
regulation of signaling (GO:0023051)	3392	54	23.39	+	2.31	8.92E-10	6.93E-07
regulation of cell communication (GO:0010646)	3401	54	23.45	+	2.30	9.55E-10	7.06E-07
regulation of programmed cell death (GO:0043067)	1517	24	10.46	+	2.29	1.40E-04	1.00E-02
regulation of apoptotic process (GO:0042981)	1467	23	10.12	+	2.27	2.22E-04	1.47E-02
signal transduction (GO:0007165)	4801	72	33.11	+	2.17	1.98E-12	4.40E-09
signaling (GO:0023052)	5101	76	35.18	+	2.16	3.06E-13	9.50E-10
regulation of catalytic activity (GO:0050790)	1826	27	12.59	+	2.14	1.57E-04	1.10E-02
regulation of response to stimulus (GO:0048583)	3954	58	27.27	+	2.13	3.09E-09	1.65E-06
response to organic substance (GO:0010033)	2592	38	17.87	+	2.13	5.60E-06	8.05E-04
cell communication (GO:0007154)	5260	77	36.27	+	2.12	5.21E-13	1.35E-09
positive regulation of molecular function (GO:0044093)	1518	22	10.47	+	2.10	9.98E-04	4.51E-02
response to external stimulus (GO:0009605)	2419	35	16.68	+	2.10	1.98E-05	2.19E-03
anatomical structure development (GO:0048856)	5189	74	35.78	+	2.07	9.43E-12	1.33E-08
cell development (GO:0048468)	2181	31	15.04	+	2.06	9.63E-05	7.44E-03
positive regulation of response to stimulus (GO:0048584)	2198	31	15.16	+	2.05	1.07E-04	8.00E-03
regulation of cellular component organization (GO:0051128)	2438	34	16.81	+	2.02	6.70E-05	5.45E-03
negative regulation of cellular process (GO:0048523)	4692	65	32.36	+	2.01	2.22E-09	1.50E-06
regulation of molecular function (GO:0065009)	2565	35	17.69	+	1.98	6.42E-05	5.36E-03
regulation of biological quality (GO:0065008)	2928	39	20.19	+	1.93	5.21E-05	4.62E-03
negative regulation of biological process (GO:0048519)	5307	70	36.60	+	1.91	3.23E-09	1.67E-06
developmental process (GO:0032502)	5689	75	39.23	+	1.91	3.39E-10	3.10E-07
response to chemical (GO:0042221)	3886	50	26.80	+	1.87	4.56E-06	6.87E-04
cell differentiation (GO:0030154)	3581	46	24.69	+	1.86	1.79E-05	2.08E-03
cellular developmental process (GO:0048869)	3605	46	24.86	+	1.85	1.92E-05	2.16E-03
negative regulation of macromolecule metabolic process (GO:0010605)	2750	35	18.96	+	1.85	2.85E-04	1.73E-02
cellular response to stimulus (GO:0051716)	6449	82	44.47	+	1.84	1.27E-10	1.41E-07
multicellular organismal process (GO:0032501)	6692	85	46.15	+	1.84	3.09E-11	3.69E-08
negative regulation of metabolic process (GO:0009892)	2980	37	20.55	+	1.80	2.91E-04	1.77E-02
positive regulation of cellular process (GO:0048522)	5492	63	37.87	+	1.66	6.17E-06	8.72E-04
positive regulation of biological process (GO:0048518)	6198	71	42.74	+	1.66	8.30E-07	1.50E-04
response to stimulus (GO:0050896)	8207	92	56.59	+	1.63	2.63E-09	1.57E-06
regulation of cellular process (GO:0050794)	10986	110	75.76	+	1.45	4.75E-09	2.31E-06
regulation of biological process (GO:0050789)	11752	113	81.04	+	1.39	2.93E-08	9.67E-06
biological regulation (GO:0065007)	12172	114	83.94	+	1.36	1.13E-07	2.74E-05
cellular process (GO:0009987)	14613	120	100.77	+	1.19	2.61E-04	1.65E-02

## Sheet: Table S3 Down in leo1 0.1 vs 10
Analysis Type:	PANTHER Overrepresentation Test (Released 20231017)
Annotation Version and Release Date:	GO Ontology database DOI: 10.5281/zenodo.7942786 Released 2023-01-05
Analyzed List:	upload_1 (Homo sapiens)
Reference List:	Homo sapiens (all genes in database)
Test Type:	FISHER
Correction:	FDR
GO biological process complete	Homo sapiens - REFLIST (20592)	upload_1 (542)	upload_1 (expected)	upload_1 (over/under)	upload_1 (fold Enrichment)	upload_1 (raw P-value)	upload_1 (FDR)
cardiac chamber formation (GO:0003207)	11	4	.29	+	13.82	4.66E-04	3.69E-02
secondary heart field specification (GO:0003139)	11	4	.29	+	13.82	4.66E-04	3.68E-02
heart field specification (GO:0003128)	12	4	.32	+	12.66	6.09E-04	4.55E-02
iron ion transmembrane transport (GO:0034755)	27	7	.71	+	9.85	2.07E-05	4.07E-03
mesenchymal cell proliferation (GO:0010463)	28	7	.74	+	9.50	2.53E-05	4.73E-03
renal absorption (GO:0070293)	29	6	.76	+	7.86	2.39E-04	2.24E-02
epithelial cell differentiation involved in kidney development (GO:0035850)	36	7	.95	+	7.39	1.02E-04	1.26E-02
cardiac atrium development (GO:0003230)	37	7	.97	+	7.19	1.18E-04	1.43E-02
positive regulation of animal organ morphogenesis (GO:0110110)	32	6	.84	+	7.12	3.80E-04	3.12E-02
semi-lunar valve development (GO:1905314)	47	8	1.24	+	6.47	7.49E-05	1.05E-02
cell differentiation involved in kidney development (GO:0061005)	47	8	1.24	+	6.47	7.49E-05	1.04E-02
cardiac chamber morphogenesis (GO:0003206)	125	21	3.29	+	6.38	1.65E-10	2.33E-07
chondroitin sulfate proteoglycan metabolic process (GO:0050654)	36	6	.95	+	6.33	6.62E-04	4.76E-02
negative regulation of epithelial cell differentiation (GO:0030857)	49	8	1.29	+	6.20	9.72E-05	1.23E-02
aortic valve development (GO:0003176)	43	7	1.13	+	6.18	2.70E-04	2.45E-02
glomerulus development (GO:0032835)	56	9	1.47	+	6.11	4.00E-05	6.41E-03
chondrocyte differentiation (GO:0002062)	88	14	2.32	+	6.04	3.38E-07	1.69E-04
positive regulation of bone mineralization (GO:0030501)	44	7	1.16	+	6.04	3.06E-04	2.64E-02
positive regulation of ossification (GO:0045778)	53	8	1.40	+	5.73	1.58E-04	1.73E-02
regulation of cartilage development (GO:0061035)	73	11	1.92	+	5.72	9.76E-06	2.30E-03
regulation of chondrocyte differentiation (GO:0032330)	54	8	1.42	+	5.63	1.78E-04	1.81E-02
cardiac ventricle morphogenesis (GO:0003208)	70	10	1.84	+	5.43	3.73E-05	6.29E-03
cardiac chamber development (GO:0003205)	168	24	4.42	+	5.43	1.63E-10	2.54E-07
heart valve development (GO:0003170)	72	10	1.90	+	5.28	4.63E-05	7.18E-03
regulation of establishment of planar polarity (GO:0090175)	58	8	1.53	+	5.24	2.76E-04	2.49E-02
cardiac muscle tissue morphogenesis (GO:0055008)	60	8	1.58	+	5.07	3.40E-04	2.89E-02
heart valve morphogenesis (GO:0003179)	61	8	1.61	+	4.98	3.76E-04	3.11E-02
outflow tract morphogenesis (GO:0003151)	77	10	2.03	+	4.93	7.72E-05	1.05E-02
cardiac septum morphogenesis (GO:0060411)	70	9	1.84	+	4.88	1.88E-04	1.87E-02
muscle tissue morphogenesis (GO:0060415)	71	9	1.87	+	4.82	2.07E-04	2.02E-02
proteoglycan metabolic process (GO:0006029)	91	11	2.40	+	4.59	6.18E-05	8.81E-03
cellular response to retinoic acid (GO:0071300)	67	8	1.76	+	4.54	6.64E-04	4.75E-02
aminoglycan biosynthetic process (GO:0006023)	67	8	1.76	+	4.54	6.64E-04	4.73E-02
inorganic ion import across plasma membrane (GO:0099587)	110	13	2.90	+	4.49	1.69E-05	3.54E-03
inorganic cation import across plasma membrane (GO:0098659)	110	13	2.90	+	4.49	1.69E-05	3.49E-03
cardiac ventricle development (GO:0003231)	127	15	3.34	+	4.49	3.86E-06	1.11E-03
regulation of animal organ morphogenesis (GO:2000027)	129	15	3.40	+	4.42	4.60E-06	1.25E-03
muscle organ morphogenesis (GO:0048644)	78	9	2.05	+	4.38	3.90E-04	3.19E-02
regulation of bone mineralization (GO:0030500)	79	9	2.08	+	4.33	4.25E-04	3.42E-02
cardiac septum development (GO:0003279)	107	12	2.82	+	4.26	5.64E-05	8.26E-03
neural crest cell differentiation (GO:0014033)	92	10	2.42	+	4.13	2.92E-04	2.55E-02
regulation of ossification (GO:0030278)	120	13	3.16	+	4.12	3.88E-05	6.41E-03
bone morphogenesis (GO:0060349)	102	11	2.68	+	4.10	1.57E-04	1.74E-02
regulation of heart rate (GO:0002027)	102	11	2.68	+	4.10	1.57E-04	1.73E-02
response to retinoic acid (GO:0032526)	112	12	2.95	+	4.07	8.43E-05	1.13E-02
negative regulation of transforming growth factor beta receptor signaling pathway (GO:0030512)	94	10	2.47	+	4.04	3.42E-04	2.88E-02
mesenchymal cell differentiation (GO:0048762)	171	18	4.50	+	4.00	1.94E-06	6.53E-04
heart morphogenesis (GO:0003007)	255	26	6.71	+	3.87	1.90E-08	1.64E-05
cartilage development (GO:0051216)	177	18	4.66	+	3.86	3.03E-06	9.40E-04
cardiocyte differentiation (GO:0035051)	118	12	3.11	+	3.86	1.33E-04	1.55E-02
bone development (GO:0060348)	197	20	5.19	+	3.86	8.84E-07	3.52E-04
nephron development (GO:0072006)	138	14	3.63	+	3.85	3.84E-05	6.42E-03
nephron epithelium development (GO:0072009)	109	11	2.87	+	3.83	2.66E-04	2.43E-02
aminoglycan metabolic process (GO:0006022)	121	12	3.18	+	3.77	1.65E-04	1.73E-02
glycosaminoglycan metabolic process (GO:0030203)	112	11	2.95	+	3.73	3.30E-04	2.83E-02
import across plasma membrane (GO:0098739)	167	16	4.40	+	3.64	2.10E-05	4.08E-03
mesenchyme development (GO:0060485)	243	23	6.40	+	3.60	4.23E-07	1.99E-04
kidney epithelium development (GO:0072073)	140	13	3.68	+	3.53	1.64E-04	1.74E-02
cell-cell signaling by wnt (GO:0198738)	287	26	7.55	+	3.44	1.66E-07	9.54E-05
Wnt signaling pathway (GO:0016055)	287	26	7.55	+	3.44	1.66E-07	9.20E-05
digestive tract development (GO:0048565)	133	12	3.50	+	3.43	3.68E-04	3.06E-02
cellular response to transforming growth factor beta stimulus (GO:0071560)	156	14	4.11	+	3.41	1.29E-04	1.55E-02
negative regulation of transmembrane receptor protein serine/threonine kinase signaling pathway (GO:0090101)	145	13	3.82	+	3.41	2.25E-04	2.17E-02
digestive system development (GO:0055123)	145	13	3.82	+	3.41	2.25E-04	2.16E-02
locomotory behavior (GO:0007626)	204	18	5.37	+	3.35	1.83E-05	3.69E-03
stem cell differentiation (GO:0048863)	182	16	4.79	+	3.34	5.49E-05	8.12E-03
extracellular matrix organization (GO:0030198)	275	24	7.24	+	3.32	9.18E-07	3.56E-04
negative regulation of canonical Wnt signaling pathway (GO:0090090)	138	12	3.63	+	3.30	5.01E-04	3.91E-02
extracellular structure organization (GO:0043062)	276	24	7.26	+	3.30	9.74E-07	3.69E-04
external encapsulating structure organization (GO:0045229)	278	24	7.32	+	3.28	1.10E-06	3.78E-04
epithelial cell proliferation (GO:0050673)	174	15	4.58	+	3.28	1.14E-04	1.39E-02
response to transforming growth factor beta (GO:0071559)	163	14	4.29	+	3.26	1.98E-04	1.96E-02
regulation of endothelial cell proliferation (GO:0001936)	140	12	3.68	+	3.26	5.65E-04	4.30E-02
regulation of transforming growth factor beta receptor signaling pathway (GO:0017015)	140	12	3.68	+	3.26	5.65E-04	4.28E-02
osteoblast differentiation (GO:0001649)	141	12	3.71	+	3.23	5.99E-04	4.49E-02
regulation of cellular response to transforming growth factor beta stimulus (GO:1903844)	143	12	3.76	+	3.19	6.72E-04	4.77E-02
positive regulation of neuron projection development (GO:0010976)	155	13	4.08	+	3.19	4.09E-04	3.33E-02
calcium-mediated signaling (GO:0019722)	155	13	4.08	+	3.19	4.09E-04	3.31E-02
connective tissue development (GO:0061448)	233	19	6.13	+	3.10	2.98E-05	5.32E-03
cardiac muscle tissue development (GO:0048738)	184	15	4.84	+	3.10	2.01E-04	1.98E-02
regulation of transmembrane receptor protein serine/threonine kinase signaling pathway (GO:0090092)	275	22	7.24	+	3.04	9.46E-06	2.26E-03
cell surface receptor signaling pathway involved in cell-cell signaling (GO:1905114)	363	29	9.55	+	3.04	3.79E-07	1.84E-04
kidney development (GO:0001822)	303	24	7.98	+	3.01	4.39E-06	1.22E-03
regulation of heart contraction (GO:0008016)	202	16	5.32	+	3.01	1.70E-04	1.76E-02
striated muscle tissue development (GO:0014706)	190	15	5.00	+	3.00	2.78E-04	2.49E-02
skeletal system morphogenesis (GO:0048705)	232	18	6.11	+	2.95	8.69E-05	1.14E-02
axon guidance (GO:0007411)	234	18	6.16	+	2.92	9.62E-05	1.23E-02
neuron projection guidance (GO:0097485)	234	18	6.16	+	2.92	9.62E-05	1.22E-02
renal system development (GO:0072001)	313	24	8.24	+	2.91	7.32E-06	1.83E-03
response to mechanical stimulus (GO:0009612)	223	17	5.87	+	2.90	1.65E-04	1.74E-02
transmembrane receptor protein serine/threonine kinase signaling pathway (GO:0007178)	210	16	5.53	+	2.89	2.56E-04	2.38E-02
ear development (GO:0043583)	230	17	6.05	+	2.81	2.32E-04	2.20E-02
enzyme-linked receptor protein signaling pathway (GO:0007167)	639	47	16.82	+	2.79	1.06E-09	1.37E-06
skeletal system development (GO:0001501)	504	37	13.27	+	2.79	7.06E-08	4.57E-05
transmembrane receptor protein tyrosine kinase signaling pathway (GO:0007169)	423	31	11.13	+	2.78	8.55E-07	3.50E-04
embryonic organ morphogenesis (GO:0048562)	301	22	7.92	+	2.78	3.46E-05	6.03E-03
ossification (GO:0001503)	288	21	7.58	+	2.77	5.35E-05	7.98E-03
heart development (GO:0007507)	563	41	14.82	+	2.77	1.67E-08	1.53E-05
positive regulation of epithelial cell proliferation (GO:0050679)	209	15	5.50	+	2.73	7.06E-04	4.92E-02
regulation of cellular response to growth factor stimulus (GO:0090287)	313	22	8.24	+	2.67	5.96E-05	8.65E-03
tissue morphogenesis (GO:0048729)	570	40	15.00	+	2.67	6.42E-08	4.75E-05
muscle contraction (GO:0006936)	229	16	6.03	+	2.65	6.24E-04	4.57E-02
animal organ morphogenesis (GO:0009887)	991	68	26.08	+	2.61	3.34E-12	6.48E-09
regulation of blood circulation (GO:1903522)	249	17	6.55	+	2.59	5.46E-04	4.20E-02
positive regulation of cell projection organization (GO:0031346)	354	24	9.32	+	2.58	4.77E-05	7.34E-03
embryonic organ development (GO:0048568)	458	31	12.05	+	2.57	4.01E-06	1.13E-03
muscle cell differentiation (GO:0042692)	269	18	7.08	+	2.54	4.75E-04	3.72E-02
cellular response to growth factor stimulus (GO:0071363)	479	32	12.61	+	2.54	5.07E-06	1.36E-03
response to hypoxia (GO:0001666)	272	18	7.16	+	2.51	5.36E-04	4.14E-02
behavior (GO:0007610)	622	41	16.37	+	2.50	2.38E-07	1.23E-04
glycoprotein metabolic process (GO:0009100)	350	23	9.21	+	2.50	1.63E-04	1.74E-02
response to growth factor (GO:0070848)	510	33	13.42	+	2.46	5.44E-06	1.41E-03
regulation of epithelial cell proliferation (GO:0050678)	372	24	9.79	+	2.45	1.29E-04	1.56E-02
circulatory system development (GO:0072359)	926	59	24.37	+	2.42	1.41E-09	1.68E-06
morphogenesis of an epithelium (GO:0002009)	458	29	12.05	+	2.41	2.91E-05	5.25E-03
blood vessel development (GO:0001568)	526	32	13.84	+	2.31	2.81E-05	5.14E-03
vasculature development (GO:0001944)	546	33	14.37	+	2.30	2.20E-05	4.17E-03
tube morphogenesis (GO:0035239)	683	41	17.98	+	2.28	3.09E-06	9.39E-04
embryonic morphogenesis (GO:0048598)	591	35	15.56	+	2.25	1.64E-05	3.53E-03
tube development (GO:0035295)	899	53	23.66	+	2.24	1.39E-07	8.32E-05
circulatory system process (GO:0003013)	493	29	12.98	+	2.23	1.07E-04	1.32E-02
metal ion transport (GO:0030001)	640	37	16.85	+	2.20	1.75E-05	3.58E-03
chemotaxis (GO:0006935)	521	30	13.71	+	2.19	1.62E-04	1.75E-02
sensory organ development (GO:0007423)	591	34	15.56	+	2.19	4.61E-05	7.23E-03
taxis (GO:0042330)	523	30	13.77	+	2.18	1.66E-04	1.73E-02
growth (GO:0040007)	419	24	11.03	+	2.18	6.29E-04	4.59E-02
developmental growth (GO:0048589)	419	24	11.03	+	2.18	6.29E-04	4.57E-02
cell adhesion (GO:0007155)	966	55	25.43	+	2.16	2.21E-07	1.18E-04
cellular response to lipid (GO:0071396)	527	30	13.87	+	2.16	1.74E-04	1.79E-02
gland development (GO:0048732)	425	24	11.19	+	2.15	7.21E-04	4.98E-02
cell-cell signaling (GO:0007267)	1091	61	28.72	+	2.12	7.85E-08	4.88E-05
locomotion (GO:0040011)	542	30	14.27	+	2.10	2.28E-04	2.17E-02
anatomical structure formation involved in morphogenesis (GO:0048646)	959	53	25.24	+	2.10	1.04E-06	3.75E-04
anatomical structure morphogenesis (GO:0009653)	2239	123	58.93	+	2.09	9.02E-15	4.67E-11
regulation of anatomical structure morphogenesis (GO:0022603)	871	47	22.93	+	2.05	8.31E-06	2.05E-03
cellular response to organic cyclic compound (GO:0071407)	502	27	13.21	+	2.04	6.99E-04	4.91E-02
muscle structure development (GO:0061061)	503	27	13.24	+	2.04	7.14E-04	4.95E-02
inorganic cation transmembrane transport (GO:0098662)	635	34	16.71	+	2.03	1.56E-04	1.75E-02
positive regulation of phosphorylation (GO:0042327)	771	41	20.29	+	2.02	3.68E-05	6.34E-03
cell surface receptor signaling pathway (GO:0007166)	2090	111	55.01	+	2.02	2.14E-12	5.53E-09
regulation of system process (GO:0044057)	567	30	14.92	+	2.01	5.13E-04	3.99E-02
import into cell (GO:0098657)	722	38	19.00	+	2.00	9.21E-05	1.19E-02
embryo development (GO:0009790)	1054	55	27.74	+	1.98	3.18E-06	9.49E-04
monoatomic cation transmembrane transport (GO:0098655)	654	34	17.21	+	1.98	3.02E-04	2.62E-02
response to organic cyclic compound (GO:0014070)	871	45	22.93	+	1.96	3.71E-05	6.33E-03
cellular response to endogenous stimulus (GO:0071495)	1201	62	31.61	+	1.96	8.42E-07	3.53E-04
cell population proliferation (GO:0008283)	729	37	19.19	+	1.93	2.51E-04	2.35E-02
monoatomic cation transport (GO:0006812)	790	40	20.79	+	1.92	1.76E-04	1.80E-02
cell migration (GO:0016477)	891	45	23.45	+	1.92	5.00E-05	7.54E-03
inorganic ion transmembrane transport (GO:0098660)	733	37	19.29	+	1.92	2.66E-04	2.44E-02
system development (GO:0048731)	3548	178	93.39	+	1.91	4.57E-18	7.10E-14
positive regulation of developmental process (GO:0051094)	1318	66	34.69	+	1.90	1.00E-06	3.71E-04
positive regulation of protein phosphorylation (GO:0001934)	711	35	18.71	+	1.87	5.69E-04	4.29E-02
animal organ development (GO:0048513)	2920	143	76.86	+	1.86	2.26E-13	8.76E-10
tissue development (GO:0009888)	1747	85	45.98	+	1.85	7.03E-08	4.74E-05
regulation of multicellular organismal development (GO:2000026)	1400	68	36.85	+	1.85	1.97E-06	6.51E-04
positive regulation of phosphorus metabolic process (GO:0010562)	845	41	22.24	+	1.84	2.88E-04	2.54E-02
positive regulation of phosphate metabolic process (GO:0045937)	845	41	22.24	+	1.84	2.88E-04	2.53E-02
epithelium development (GO:0060429)	1097	53	28.87	+	1.84	4.54E-05	7.20E-03
positive regulation of cell differentiation (GO:0045597)	857	41	22.56	+	1.82	3.39E-04	2.89E-02
multicellular organism development (GO:0007275)	3959	189	104.20	+	1.81	4.31E-17	3.34E-13
regulation of cell migration (GO:0030334)	932	44	24.53	+	1.79	3.63E-04	3.05E-02
response to lipid (GO:0033993)	854	40	22.48	+	1.78	7.05E-04	4.93E-02
response to endogenous stimulus (GO:0009719)	1464	68	38.53	+	1.76	1.04E-05	2.37E-03
cell motility (GO:0048870)	1055	49	27.77	+	1.76	1.81E-04	1.81E-02
monoatomic ion transport (GO:0006811)	991	46	26.08	+	1.76	3.66E-04	3.05E-02
cellular response to organic substance (GO:0071310)	1777	82	46.77	+	1.75	1.06E-06	3.76E-04
positive regulation of multicellular organismal process (GO:0051240)	1651	76	43.46	+	1.75	3.33E-06	9.75E-04
central nervous system development (GO:0007417)	1069	49	28.14	+	1.74	2.81E-04	2.50E-02
nervous system development (GO:0007399)	2230	102	58.70	+	1.74	6.56E-08	4.63E-05
regulation of cell motility (GO:2000145)	990	45	26.06	+	1.73	5.51E-04	4.21E-02
neurogenesis (GO:0022008)	1318	59	34.69	+	1.70	1.31E-04	1.54E-02
neuron differentiation (GO:0030182)	1078	48	28.37	+	1.69	6.23E-04	4.59E-02
cellular response to oxygen-containing compound (GO:1901701)	1146	51	30.16	+	1.69	4.40E-04	3.53E-02
generation of neurons (GO:0048699)	1148	51	30.22	+	1.69	4.46E-04	3.55E-02
transmembrane transport (GO:0055085)	1246	55	32.80	+	1.68	2.65E-04	2.45E-02
regulation of multicellular organismal process (GO:0051239)	2975	129	78.30	+	1.65	1.22E-08	1.18E-05
regulation of cell differentiation (GO:0045595)	1554	66	40.90	+	1.61	2.09E-04	2.03E-02
regulation of transport (GO:0051049)	1771	75	46.61	+	1.61	7.53E-05	1.04E-02
regulation of developmental process (GO:0050793)	2456	103	64.64	+	1.59	2.67E-06	8.46E-04
regulation of cell population proliferation (GO:0042127)	1670	70	43.96	+	1.59	1.80E-04	1.81E-02
cellular response to chemical stimulus (GO:0070887)	2394	100	63.01	+	1.59	5.37E-06	1.41E-03
anatomical structure development (GO:0048856)	5189	214	136.58	+	1.57	6.21E-13	1.93E-09
response to organic substance (GO:0010033)	2592	106	68.22	+	1.55	6.03E-06	1.54E-03
response to oxygen-containing compound (GO:1901700)	1681	68	44.25	+	1.54	6.35E-04	4.59E-02
regulation of localization (GO:0032879)	2126	86	55.96	+	1.54	8.52E-05	1.13E-02
cell development (GO:0048468)	2181	87	57.41	+	1.52	1.35E-04	1.57E-02
cell differentiation (GO:0030154)	3581	142	94.26	+	1.51	4.33E-07	1.98E-04
cellular developmental process (GO:0048869)	3605	142	94.89	+	1.50	6.29E-07	2.71E-04
developmental process (GO:0032502)	5689	223	149.74	+	1.49	3.06E-11	5.28E-08
signal transduction (GO:0007165)	4801	185	126.37	+	1.46	1.93E-08	1.58E-05
signaling (GO:0023052)	5101	196	134.26	+	1.46	6.34E-09	6.57E-06
cell communication (GO:0007154)	5260	202	138.45	+	1.46	3.59E-09	3.98E-06
multicellular organismal process (GO:0032501)	6692	256	176.14	+	1.45	2.53E-12	5.62E-09
regulation of biological quality (GO:0065008)	2928	110	77.07	+	1.43	1.46E-04	1.65E-02
regulation of cell communication (GO:0010646)	3401	126	89.52	+	1.41	6.85E-05	9.68E-03
regulation of signaling (GO:0023051)	3392	124	89.28	+	1.39	1.40E-04	1.61E-02
cellular response to stimulus (GO:0051716)	6449	233	169.74	+	1.37	2.18E-08	1.69E-05
regulation of response to stimulus (GO:0048583)	3954	137	104.07	+	1.32	6.22E-04	4.60E-02
response to stimulus (GO:0050896)	8207	275	216.02	+	1.27	4.82E-07	2.14E-04
positive regulation of biological process (GO:0048518)	6198	207	163.14	+	1.27	8.17E-05	1.10E-02
regulation of biological process (GO:0050789)	11752	356	309.32	+	1.15	6.05E-05	8.69E-03
regulation of cellular process (GO:0050794)	10986	332	289.16	+	1.15	2.87E-04	2.54E-02
biological regulation (GO:0065007)	12172	364	320.38	+	1.14	1.62E-04	1.76E-02
cellular process (GO:0009987)	14613	430	384.63	+	1.12	1.45E-05	3.17E-03
biological_process (GO:0008150)	17714	498	466.25	+	1.07	3.94E-05	6.37E-03
organic cyclic compound metabolic process (GO:1901360)	3244	57	85.39	-	.67	6.18E-04	4.59E-02
cellular aromatic compound metabolic process (GO:0006725)	3002	49	79.02	-	.62	1.53E-04	1.72E-02
cellular nitrogen compound metabolic process (GO:0034641)	3334	52	87.75	-	.59	1.39E-05	3.08E-03
nucleobase-containing compound metabolic process (GO:0006139)	2784	43	73.28	-	.59	8.94E-05	1.17E-02
Unclassified (UNCLASSIFIED)	2878	44	75.75	-	.58	3.94E-05	6.44E-03
heterocycle metabolic process (GO:0046483)	2960	45	77.91	-	.58	2.75E-05	5.09E-03
nucleic acid metabolic process (GO:0090304)	2270	31	59.75	-	.52	3.39E-05	5.98E-03
gene expression (GO:0010467)	1823	24	47.98	-	.50	1.45E-04	1.65E-02
regulation of cell cycle (GO:0051726)	1119	9	29.45	-	.31	1.64E-05	3.49E-03
cell cycle process (GO:0022402)	881	7	23.19	-	.30	1.30E-04	1.54E-02
cell cycle (GO:0007049)	1270	10	33.43	-	.30	2.59E-06	8.38E-04
mitotic cell cycle (GO:0000278)	616	4	16.21	-	.25	6.74E-04	4.76E-02
RNA processing (GO:0006396)	881	5	23.19	-	.22	1.03E-05	2.38E-03
detection of chemical stimulus involved in sensory perception (GO:0050907)	481	1	12.66	-	.08	9.98E-05	1.25E-02
detection of chemical stimulus (GO:0009593)	514	1	13.53	-	.07	4.84E-05	7.37E-03
sensory perception of chemical stimulus (GO:0007606)	539	1	14.19	-	.07	2.17E-05	4.15E-03
detection of chemical stimulus involved in sensory perception of smell (GO:0050911)	433	0	11.40	-	< 0.01	1.97E-05	3.92E-03
ribonucleoprotein complex biogenesis (GO:0022613)	455	0	11.98	-	< 0.01	1.38E-05	3.12E-03
sensory perception of smell (GO:0007608)	460	0	12.11	-	< 0.01	8.91E-06	2.16E-03

## Sheet: Table S4 Up in leo1 0.1 vs 10
Analysis Type:	PANTHER Overrepresentation Test (Released 20231017)
Annotation Version and Release Date:	GO Ontology database DOI: 10.5281/zenodo.7942786 Released 2023-01-05
Analyzed List:	upload_1 (Homo sapiens)
Reference List:	Homo sapiens (all genes in database)
Test Type:	FISHER
Correction:	FDR
GO biological process complete	Homo sapiens - REFLIST (20592)	upload_1 (549)	upload_1 (expected)	upload_1 (over/under)	upload_1 (fold Enrichment)	upload_1 (raw P-value)	upload_1 (FDR)
negative regulation of alkaline phosphatase activity (GO:0010693)	3	3	.08	+	37.51	3.29E-04	3.11E-02
interleukin-27-mediated signaling pathway (GO:0070106)	7	4	.19	+	21.43	1.28E-04	1.63E-02
regulation of ribonuclease activity (GO:0060700)	9	5	.24	+	20.84	1.91E-05	3.81E-03
anterograde axonal protein transport (GO:0099641)	9	4	.24	+	16.67	2.67E-04	2.82E-02
axo-dendritic protein transport (GO:0099640)	9	4	.24	+	16.67	2.67E-04	2.80E-02
protein localization to presynapse (GO:1905383)	9	4	.24	+	16.67	2.67E-04	2.78E-02
protein kinase C signaling (GO:0070528)	17	5	.45	+	11.03	2.12E-04	2.44E-02
secondary alcohol biosynthetic process (GO:1902653)	37	10	.99	+	10.14	2.80E-07	1.06E-04
cholesterol biosynthetic process (GO:0006695)	37	10	.99	+	10.14	2.80E-07	1.04E-04
regulation of nuclease activity (GO:0032069)	22	5	.59	+	8.52	5.83E-04	4.74E-02
sterol biosynthetic process (GO:0016126)	44	10	1.17	+	8.52	1.10E-06	3.42E-04
regulation of renal system process (GO:0098801)	34	7	.91	+	7.72	8.01E-05	1.13E-02
isoprenoid biosynthetic process (GO:0008299)	30	6	.80	+	7.50	3.00E-04	2.94E-02
negative regulation of viral genome replication (GO:0045071)	56	10	1.49	+	6.70	7.34E-06	1.75E-03
positive regulation of interferon-beta production (GO:0032728)	42	7	1.12	+	6.25	2.56E-04	2.78E-02
antiviral innate immune response (GO:0140374)	49	8	1.31	+	6.12	1.06E-04	1.43E-02
leukocyte cell-cell adhesion (GO:0007159)	56	8	1.49	+	5.36	2.42E-04	2.65E-02
myeloid cell activation involved in immune response (GO:0002275)	66	9	1.76	+	5.11	1.38E-04	1.70E-02
regulation of viral genome replication (GO:0045069)	86	11	2.29	+	4.80	4.34E-05	7.02E-03
alcohol biosynthetic process (GO:0046165)	94	12	2.51	+	4.79	2.00E-05	3.88E-03
release of sequestered calcium ion into cytosol (GO:0051209)	63	8	1.68	+	4.76	4.97E-04	4.20E-02
positive regulation of type I interferon production (GO:0032481)	71	9	1.89	+	4.75	2.27E-04	2.55E-02
negative regulation of viral process (GO:0048525)	95	12	2.53	+	4.74	2.20E-05	4.11E-03
negative regulation of sequestering of calcium ion (GO:0051283)	64	8	1.71	+	4.69	5.47E-04	4.52E-02
negative regulation of cytokine-mediated signaling pathway (GO:0001960)	73	9	1.95	+	4.62	2.74E-04	2.72E-02
steroid biosynthetic process (GO:0006694)	116	14	3.09	+	4.53	7.44E-06	1.75E-03
negative regulation of response to cytokine stimulus (GO:0060761)	77	9	2.05	+	4.38	3.92E-04	3.50E-02
secondary alcohol metabolic process (GO:1902652)	131	15	3.49	+	4.29	6.34E-06	1.54E-03
regulation of systemic arterial blood pressure (GO:0003073)	98	11	2.61	+	4.21	1.27E-04	1.65E-02
positive regulation of MAP kinase activity (GO:0043406)	117	13	3.12	+	4.17	3.47E-05	5.92E-03
cholesterol metabolic process (GO:0008203)	121	13	3.23	+	4.03	4.77E-05	7.49E-03
xenobiotic metabolic process (GO:0006805)	124	13	3.31	+	3.93	6.01E-05	8.98E-03
defense response to virus (GO:0051607)	270	27	7.20	+	3.75	1.91E-08	1.48E-05
defense response to symbiont (GO:0140546)	271	27	7.23	+	3.74	2.05E-08	1.51E-05
regulation of phosphatidylinositol 3-kinase signaling (GO:0014066)	111	11	2.96	+	3.72	3.42E-04	3.20E-02
sterol metabolic process (GO:0016125)	135	13	3.60	+	3.61	1.33E-04	1.66E-02
negative regulation of neurogenesis (GO:0050768)	148	13	3.95	+	3.29	3.05E-04	2.98E-02
regulation of cold-induced thermogenesis (GO:0120161)	150	13	4.00	+	3.25	3.44E-04	3.20E-02
negative regulation of nervous system development (GO:0051961)	155	13	4.13	+	3.15	4.60E-04	3.95E-02
negative regulation of cell growth (GO:0030308)	191	16	5.09	+	3.14	1.08E-04	1.43E-02
cell-cell adhesion via plasma-membrane adhesion molecules (GO:0098742)	263	22	7.01	+	3.14	5.98E-06	1.47E-03
regulation of chemotaxis (GO:0050920)	228	19	6.08	+	3.13	2.68E-05	4.73E-03
organic hydroxy compound biosynthetic process (GO:1901617)	173	14	4.61	+	3.04	3.95E-04	3.50E-02
response to virus (GO:0009615)	372	30	9.92	+	3.02	2.59E-07	1.03E-04
steroid metabolic process (GO:0008202)	261	21	6.96	+	3.02	1.67E-05	3.46E-03
negative regulation of peptidase activity (GO:0010466)	218	17	5.81	+	2.92	1.49E-04	1.79E-02
cell-cell adhesion (GO:0098609)	543	42	14.48	+	2.90	3.14E-09	4.06E-06
muscle contraction (GO:0006936)	229	17	6.11	+	2.78	2.56E-04	2.76E-02
second-messenger-mediated signaling (GO:0019932)	230	17	6.13	+	2.77	2.68E-04	2.74E-02
cell morphogenesis involved in neuron differentiation (GO:0048667)	450	33	12.00	+	2.75	4.94E-07	1.67E-04
external encapsulating structure organization (GO:0045229)	278	20	7.41	+	2.70	1.12E-04	1.48E-02
negative regulation of hydrolase activity (GO:0051346)	320	23	8.53	+	2.70	3.57E-05	6.03E-03
positive regulation of cell migration (GO:0030335)	534	38	14.24	+	2.67	1.36E-07	6.62E-05
positive regulation of cell motility (GO:2000147)	559	39	14.90	+	2.62	1.50E-07	6.67E-05
neuron projection morphogenesis (GO:0048812)	488	34	13.01	+	2.61	9.86E-07	3.12E-04
blood circulation (GO:0008015)	402	28	10.72	+	2.61	8.99E-06	1.99E-03
positive regulation of locomotion (GO:0040017)	575	40	15.33	+	2.61	1.11E-07	5.58E-05
response to xenobiotic stimulus (GO:0009410)	432	30	11.52	+	2.60	4.56E-06	1.14E-03
extracellular matrix organization (GO:0030198)	275	19	7.33	+	2.59	2.68E-04	2.76E-02
plasma membrane bounded cell projection morphogenesis (GO:0120039)	493	34	13.14	+	2.59	1.22E-06	3.65E-04
extracellular structure organization (GO:0043062)	276	19	7.36	+	2.58	2.80E-04	2.77E-02
cell projection morphogenesis (GO:0048858)	498	34	13.28	+	2.56	2.20E-06	6.00E-04
cell morphogenesis involved in differentiation (GO:0000904)	522	35	13.92	+	2.51	1.91E-06	5.38E-04
axonogenesis (GO:0007409)	375	25	10.00	+	2.50	7.71E-05	1.10E-02
alcohol metabolic process (GO:0006066)	330	22	8.80	+	2.50	2.34E-04	2.60E-02
regulation of cell migration (GO:0030334)	932	62	24.85	+	2.50	2.22E-10	1.72E-06
cell part morphogenesis (GO:0032990)	518	34	13.81	+	2.46	3.80E-06	9.82E-04
cell morphogenesis (GO:0000902)	686	45	18.29	+	2.46	9.03E-08	4.84E-05
cellular component morphogenesis (GO:0032989)	618	40	16.48	+	2.43	6.64E-07	2.20E-04
neuron development (GO:0048666)	861	55	22.95	+	2.40	7.55E-09	7.82E-06
regulation of locomotion (GO:0040012)	1035	66	27.59	+	2.39	2.62E-10	1.02E-06
regulation of cell motility (GO:2000145)	990	63	26.39	+	2.39	7.97E-10	1.77E-06
neuron projection development (GO:0031175)	699	44	18.64	+	2.36	4.06E-07	1.43E-04
small molecule biosynthetic process (GO:0044283)	461	29	12.29	+	2.36	3.91E-05	6.52E-03
circulatory system process (GO:0003013)	493	31	13.14	+	2.36	2.10E-05	4.03E-03
regulation of neurogenesis (GO:0050767)	386	24	10.29	+	2.33	2.19E-04	2.48E-02
positive regulation of MAPK cascade (GO:0043410)	483	30	12.88	+	2.33	5.14E-05	7.90E-03
chemotaxis (GO:0006935)	521	32	13.89	+	2.30	2.93E-05	5.12E-03
neuron differentiation (GO:0030182)	1078	66	28.74	+	2.30	1.20E-09	2.33E-06
taxis (GO:0042330)	523	32	13.94	+	2.29	3.07E-05	5.30E-03
locomotion (GO:0040011)	542	33	14.45	+	2.28	2.39E-05	4.31E-03
axon development (GO:0061564)	430	26	11.46	+	2.27	2.40E-04	2.64E-02
positive regulation of protein kinase activity (GO:0045860)	365	22	9.73	+	2.26	5.76E-04	4.71E-02
regulation of nervous system development (GO:0051960)	466	28	12.42	+	2.25	1.33E-04	1.66E-02
cell adhesion (GO:0007155)	966	58	25.75	+	2.25	2.58E-08	1.82E-05
regulation of neuron projection development (GO:0010975)	450	27	12.00	+	2.25	1.85E-04	2.16E-02
generation of neurons (GO:0048699)	1148	68	30.61	+	2.22	2.25E-09	3.49E-06
regulation of hormone levels (GO:0010817)	541	32	14.42	+	2.22	4.94E-05	7.68E-03
positive regulation of kinase activity (GO:0033674)	430	25	11.46	+	2.18	4.61E-04	3.92E-02
regulation of plasma membrane bounded cell projection organization (GO:0120035)	643	37	17.14	+	2.16	2.31E-05	4.27E-03
organic hydroxy compound metabolic process (GO:1901615)	487	28	12.98	+	2.16	3.35E-04	3.16E-02
regulation of hydrolase activity (GO:0051336)	963	55	25.67	+	2.14	2.76E-07	1.07E-04
response to growth factor (GO:0070848)	510	29	13.60	+	2.13	2.66E-04	2.83E-02
positive regulation of response to external stimulus (GO:0032103)	532	30	14.18	+	2.12	2.15E-04	2.45E-02
cellular response to growth factor stimulus (GO:0071363)	479	27	12.77	+	2.11	5.18E-04	4.33E-02
regulation of cell projection organization (GO:0031344)	657	37	17.52	+	2.11	4.36E-05	6.99E-03
neurogenesis (GO:0022008)	1318	74	35.14	+	2.11	4.37E-09	5.22E-06
secretion (GO:0046903)	535	30	14.26	+	2.10	2.29E-04	2.56E-02
regulation of MAPK cascade (GO:0043408)	672	37	17.92	+	2.07	5.83E-05	8.79E-03
cell migration (GO:0016477)	891	49	23.75	+	2.06	4.33E-06	1.10E-03
lipid biosynthetic process (GO:0008610)	605	33	16.13	+	2.05	1.92E-04	2.22E-02
negative regulation of catalytic activity (GO:0043086)	630	34	16.80	+	2.02	1.68E-04	1.97E-02
negative regulation of multicellular organismal process (GO:0051241)	1125	58	29.99	+	1.93	3.11E-06	8.32E-04
negative regulation of cell differentiation (GO:0045596)	666	34	17.76	+	1.91	5.91E-04	4.76E-02
positive regulation of protein phosphorylation (GO:0001934)	711	36	18.96	+	1.90	3.80E-04	3.43E-02
regulation of cytokine production (GO:0001817)	775	39	20.66	+	1.89	2.67E-04	2.77E-02
innate immune response (GO:0045087)	758	38	20.21	+	1.88	3.57E-04	3.28E-02
cell-cell signaling (GO:0007267)	1091	54	29.09	+	1.86	2.18E-05	4.13E-03
regulation of cell development (GO:0060284)	829	41	22.10	+	1.86	2.74E-04	2.76E-02
nervous system development (GO:0007399)	2230	110	59.45	+	1.85	5.18E-10	1.61E-06
positive regulation of phosphorylation (GO:0042327)	771	38	20.56	+	1.85	4.23E-04	3.69E-02
regulation of multicellular organismal development (GO:2000026)	1400	69	37.33	+	1.85	1.52E-06	4.38E-04
regulation of response to external stimulus (GO:0032101)	1062	52	28.31	+	1.84	4.11E-05	6.71E-03
cell motility (GO:0048870)	1055	51	28.13	+	1.81	8.48E-05	1.19E-02
animal organ morphogenesis (GO:0009887)	991	47	26.42	+	1.78	2.70E-04	2.74E-02
response to endogenous stimulus (GO:0009719)	1464	69	39.03	+	1.77	8.00E-06	1.83E-03
response to organic cyclic compound (GO:0014070)	871	41	23.22	+	1.77	6.12E-04	4.90E-02
anatomical structure morphogenesis (GO:0009653)	2239	105	59.69	+	1.76	1.82E-08	1.49E-05
positive regulation of intracellular signal transduction (GO:1902533)	1006	47	26.82	+	1.75	3.06E-04	2.97E-02
defense response to other organism (GO:0098542)	1006	47	26.82	+	1.75	3.06E-04	2.95E-02
regulation of catalytic activity (GO:0050790)	1826	85	48.68	+	1.75	7.78E-07	2.52E-04
tissue development (GO:0009888)	1747	81	46.58	+	1.74	2.14E-06	5.92E-04
cell development (GO:0048468)	2181	101	58.15	+	1.74	8.77E-08	4.86E-05
regulation of protein phosphorylation (GO:0001932)	1071	49	28.55	+	1.72	4.51E-04	3.89E-02
response to external stimulus (GO:0009605)	2419	110	64.49	+	1.71	5.06E-08	3.02E-05
cellular response to endogenous stimulus (GO:0071495)	1201	54	32.02	+	1.69	3.18E-04	3.02E-02
negative regulation of signaling (GO:0023057)	1361	61	36.29	+	1.68	1.27E-04	1.65E-02
animal organ development (GO:0048513)	2920	130	77.85	+	1.67	5.32E-09	5.90E-06
plasma membrane bounded cell projection organization (GO:0120036)	1147	51	30.58	+	1.67	5.01E-04	4.20E-02
defense response (GO:0006952)	1429	63	38.10	+	1.65	1.31E-04	1.66E-02
regulation of multicellular organismal process (GO:0051239)	2975	131	79.32	+	1.65	9.96E-09	9.67E-06
lipid metabolic process (GO:0006629)	1228	54	32.74	+	1.65	5.19E-04	4.31E-02
response to external biotic stimulus (GO:0043207)	1374	60	36.63	+	1.64	2.74E-04	2.74E-02
regulation of molecular function (GO:0065009)	2565	112	68.39	+	1.64	2.29E-07	9.63E-05
negative regulation of response to stimulus (GO:0048585)	1635	71	43.59	+	1.63	8.87E-05	1.23E-02
system development (GO:0048731)	3548	154	94.59	+	1.63	5.78E-10	1.50E-06
negative regulation of cell communication (GO:0010648)	1360	59	36.26	+	1.63	3.59E-04	3.28E-02
regulation of phosphate metabolic process (GO:0019220)	1314	57	35.03	+	1.63	4.16E-04	3.67E-02
regulation of phosphorus metabolic process (GO:0051174)	1315	57	35.06	+	1.63	4.20E-04	3.68E-02
positive regulation of signal transduction (GO:0009967)	1549	67	41.30	+	1.62	1.62E-04	1.94E-02
regulation of cell differentiation (GO:0045595)	1554	67	41.43	+	1.62	1.66E-04	1.97E-02
response to other organism (GO:0051707)	1371	59	36.55	+	1.61	3.92E-04	3.52E-02
positive regulation of multicellular organismal process (GO:0051240)	1651	71	44.02	+	1.61	9.77E-05	1.34E-02
regulation of transport (GO:0051049)	1771	76	47.22	+	1.61	6.09E-05	9.00E-03
positive regulation of signaling (GO:0023056)	1725	74	45.99	+	1.61	7.10E-05	1.03E-02
positive regulation of cell communication (GO:0010647)	1726	74	46.02	+	1.61	7.16E-05	1.03E-02
cell surface receptor signaling pathway (GO:0007166)	2090	89	55.72	+	1.60	1.73E-05	3.49E-03
biological process involved in interspecies interaction between organisms (GO:0044419)	1551	65	41.35	+	1.57	4.32E-04	3.74E-02
positive regulation of response to stimulus (GO:0048584)	2198	92	58.60	+	1.57	1.98E-05	3.90E-03
multicellular organism development (GO:0007275)	3959	165	105.55	+	1.56	2.08E-09	3.59E-06
response to organic substance (GO:0010033)	2592	108	69.10	+	1.56	3.71E-06	9.78E-04
regulation of signaling (GO:0023051)	3392	141	90.43	+	1.56	7.87E-08	4.53E-05
regulation of cell communication (GO:0010646)	3401	140	90.67	+	1.54	1.55E-07	6.68E-05
regulation of developmental process (GO:0050793)	2456	100	65.48	+	1.53	2.64E-05	4.72E-03
cellular response to chemical stimulus (GO:0070887)	2394	97	63.83	+	1.52	3.97E-05	6.56E-03
regulation of localization (GO:0032879)	2126	86	56.68	+	1.52	1.28E-04	1.65E-02
anatomical structure development (GO:0048856)	5189	207	138.34	+	1.50	2.23E-10	1.15E-06
regulation of signal transduction (GO:0009966)	2989	119	79.69	+	1.49	9.87E-06	2.16E-03
regulation of response to stimulus (GO:0048583)	3954	155	105.42	+	1.47	4.41E-07	1.52E-04
regulation of biological quality (GO:0065008)	2928	114	78.06	+	1.46	4.40E-05	6.97E-03
response to chemical (GO:0042221)	3886	151	103.60	+	1.46	1.16E-06	3.53E-04
regulation of cellular component organization (GO:0051128)	2438	94	65.00	+	1.45	3.12E-04	2.99E-02
signal transduction (GO:0007165)	4801	182	128.00	+	1.42	2.37E-07	9.70E-05
negative regulation of biological process (GO:0048519)	5307	201	141.49	+	1.42	3.85E-08	2.39E-05
signaling (GO:0023052)	5101	192	136.00	+	1.41	1.42E-07	6.48E-05
developmental process (GO:0032502)	5689	214	151.67	+	1.41	1.45E-08	1.33E-05
cell communication (GO:0007154)	5260	197	140.24	+	1.40	1.41E-07	6.65E-05
cell differentiation (GO:0030154)	3581	132	95.47	+	1.38	1.05E-04	1.44E-02
cellular developmental process (GO:0048869)	3605	132	96.11	+	1.37	1.39E-04	1.70E-02
multicellular organismal process (GO:0032501)	6692	243	178.41	+	1.36	1.64E-08	1.41E-05
negative regulation of cellular process (GO:0048523)	4692	169	125.09	+	1.35	2.35E-05	4.30E-03
cellular response to stimulus (GO:0051716)	6449	230	171.94	+	1.34	2.81E-07	1.02E-04
response to stimulus (GO:0050896)	8207	284	218.81	+	1.30	3.11E-08	2.10E-05
regulation of biological process (GO:0050789)	11752	375	313.32	+	1.20	1.10E-07	5.70E-05
biological regulation (GO:0065007)	12172	388	324.52	+	1.20	3.28E-08	2.12E-05
regulation of cellular process (GO:0050794)	10986	345	292.90	+	1.18	1.13E-05	2.44E-03
cellular process (GO:0009987)	14613	426	389.59	+	1.09	5.83E-04	4.72E-02
macromolecule metabolic process (GO:0043170)	5864	118	156.34	-	.75	2.59E-04	2.77E-02
cellular aromatic compound metabolic process (GO:0006725)	3002	52	80.04	-	.65	5.49E-04	4.51E-02
cellular nitrogen compound metabolic process (GO:0034641)	3334	53	88.89	-	.60	1.56E-05	3.27E-03
heterocycle metabolic process (GO:0046483)	2960	47	78.92	-	.60	5.40E-05	8.22E-03
nucleobase-containing compound metabolic process (GO:0006139)	2784	41	74.22	-	.55	1.41E-05	2.99E-03
cellular nitrogen compound biosynthetic process (GO:0044271)	1623	22	43.27	-	.51	3.64E-04	3.31E-02
gene expression (GO:0010467)	1823	21	48.60	-	.43	7.56E-06	1.75E-03
nucleic acid metabolic process (GO:0090304)	2270	18	60.52	-	.30	8.04E-11	1.25E-06
RNA metabolic process (GO:0016070)	1653	11	44.07	-	.25	2.65E-09	3.73E-06
RNA biosynthetic process (GO:0032774)	644	4	17.17	-	.23	3.57E-04	3.30E-02
DNA-templated transcription (GO:0006351)	632	3	16.85	-	.18	1.06E-04	1.42E-02
RNA processing (GO:0006396)	881	4	23.49	-	.17	1.39E-06	4.07E-04
mRNA metabolic process (GO:0016071)	622	2	16.58	-	.12	1.71E-05	3.49E-03
mRNA processing (GO:0006397)	459	1	12.24	-	.08	1.44E-04	1.74E-02
ribosome biogenesis (GO:0042254)	310	0	8.26	-	< 0.01	4.61E-04	3.93E-02
RNA splicing (GO:0008380)	381	0	10.16	-	< 0.01	6.42E-05	9.40E-03
ribonucleoprotein complex biogenesis (GO:0022613)	455	0	12.13	-	< 0.01	8.90E-06	2.00E-03
